# Supplementary material
Source: PubMed Central journal article supplement (PMC2852518)

# Supplementary figure 1

a

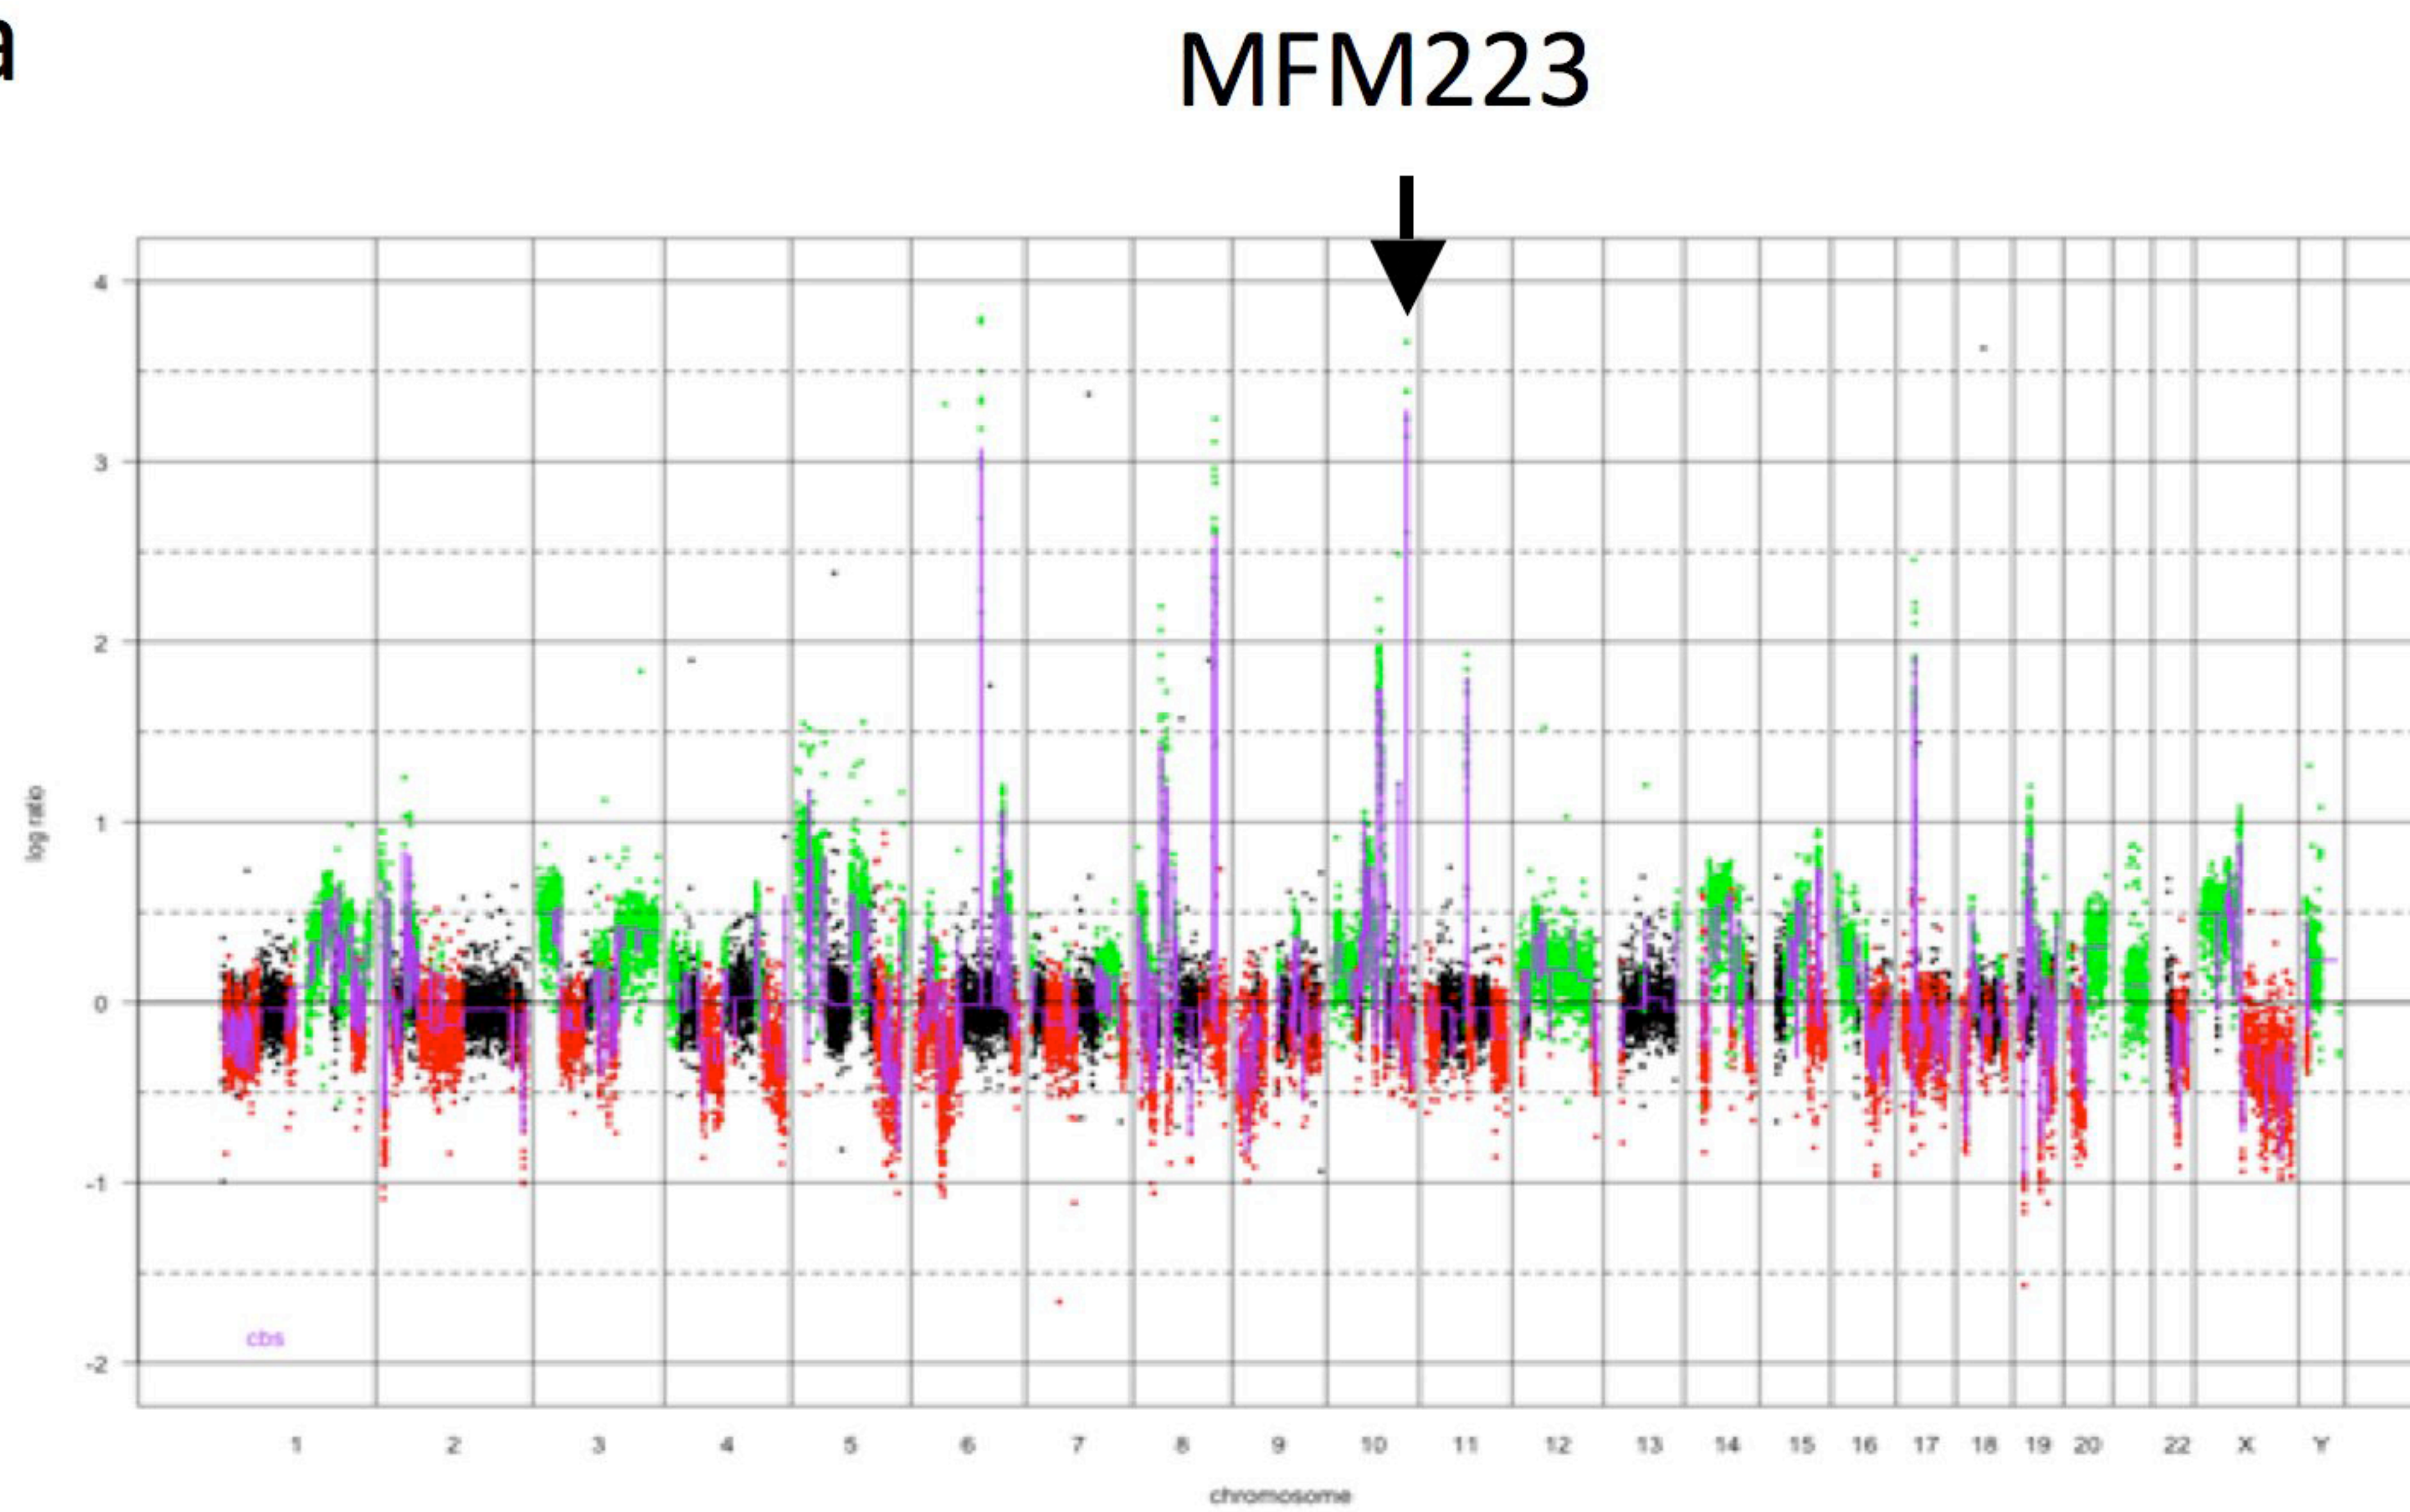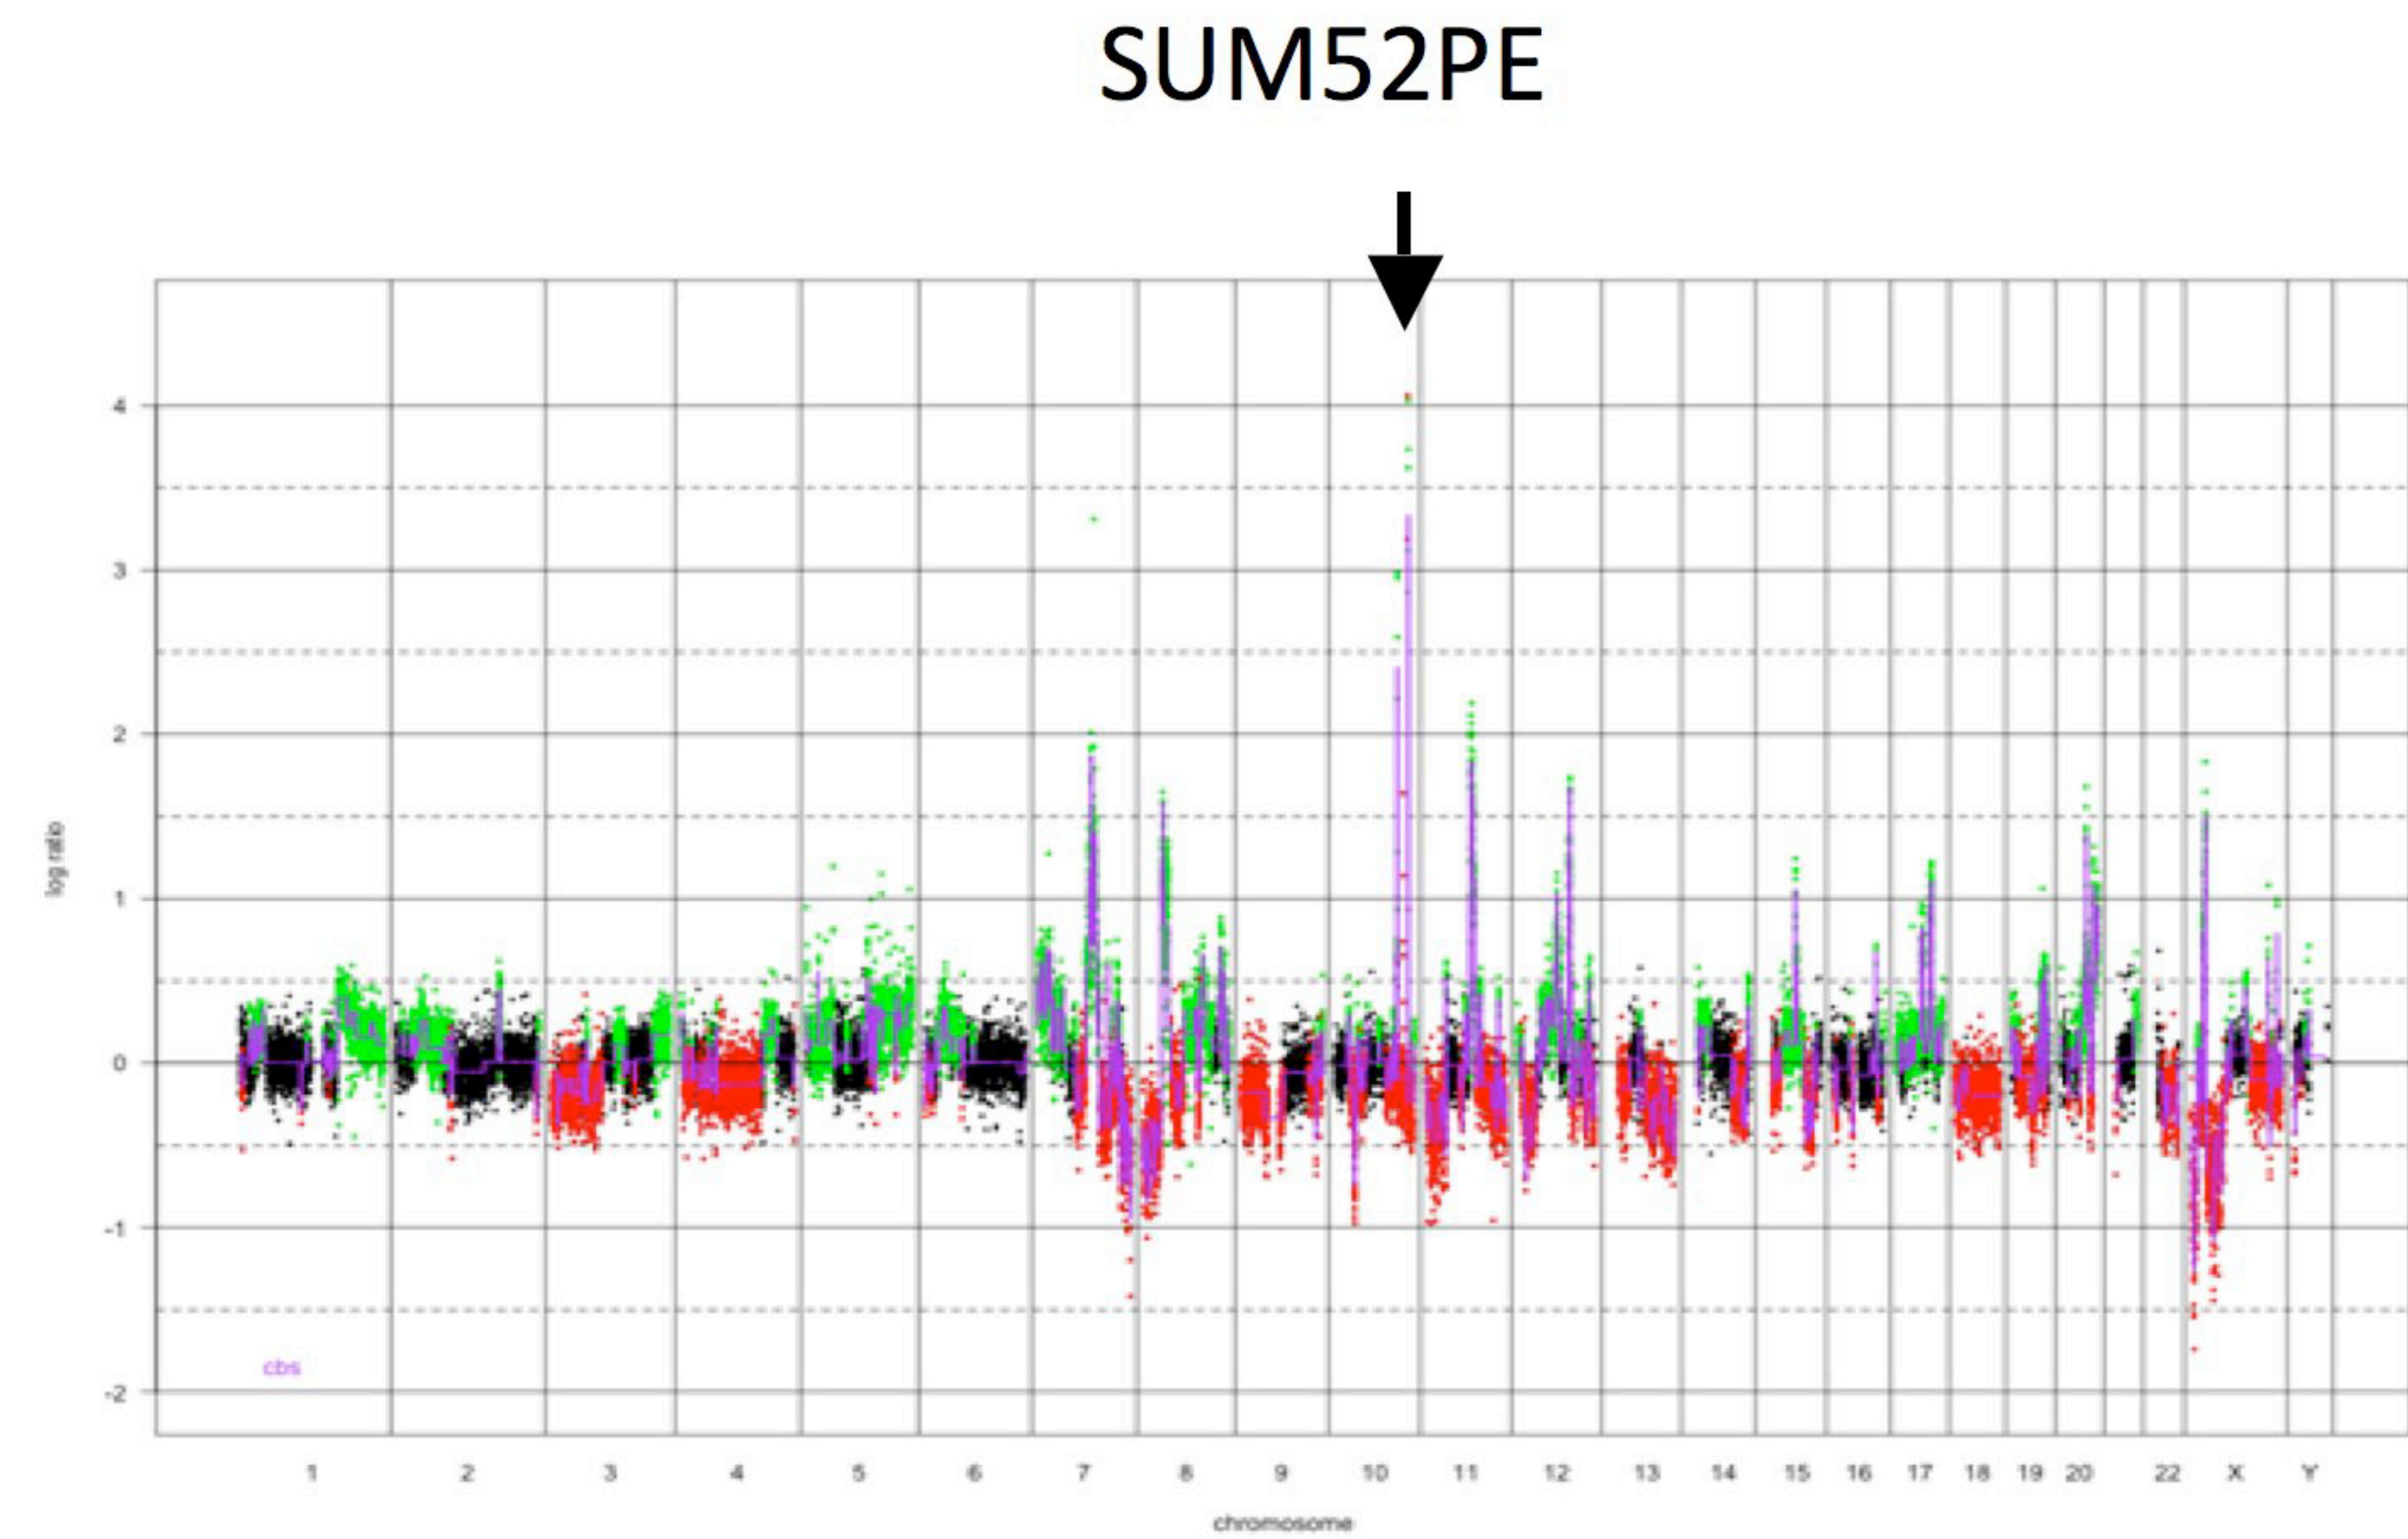

b

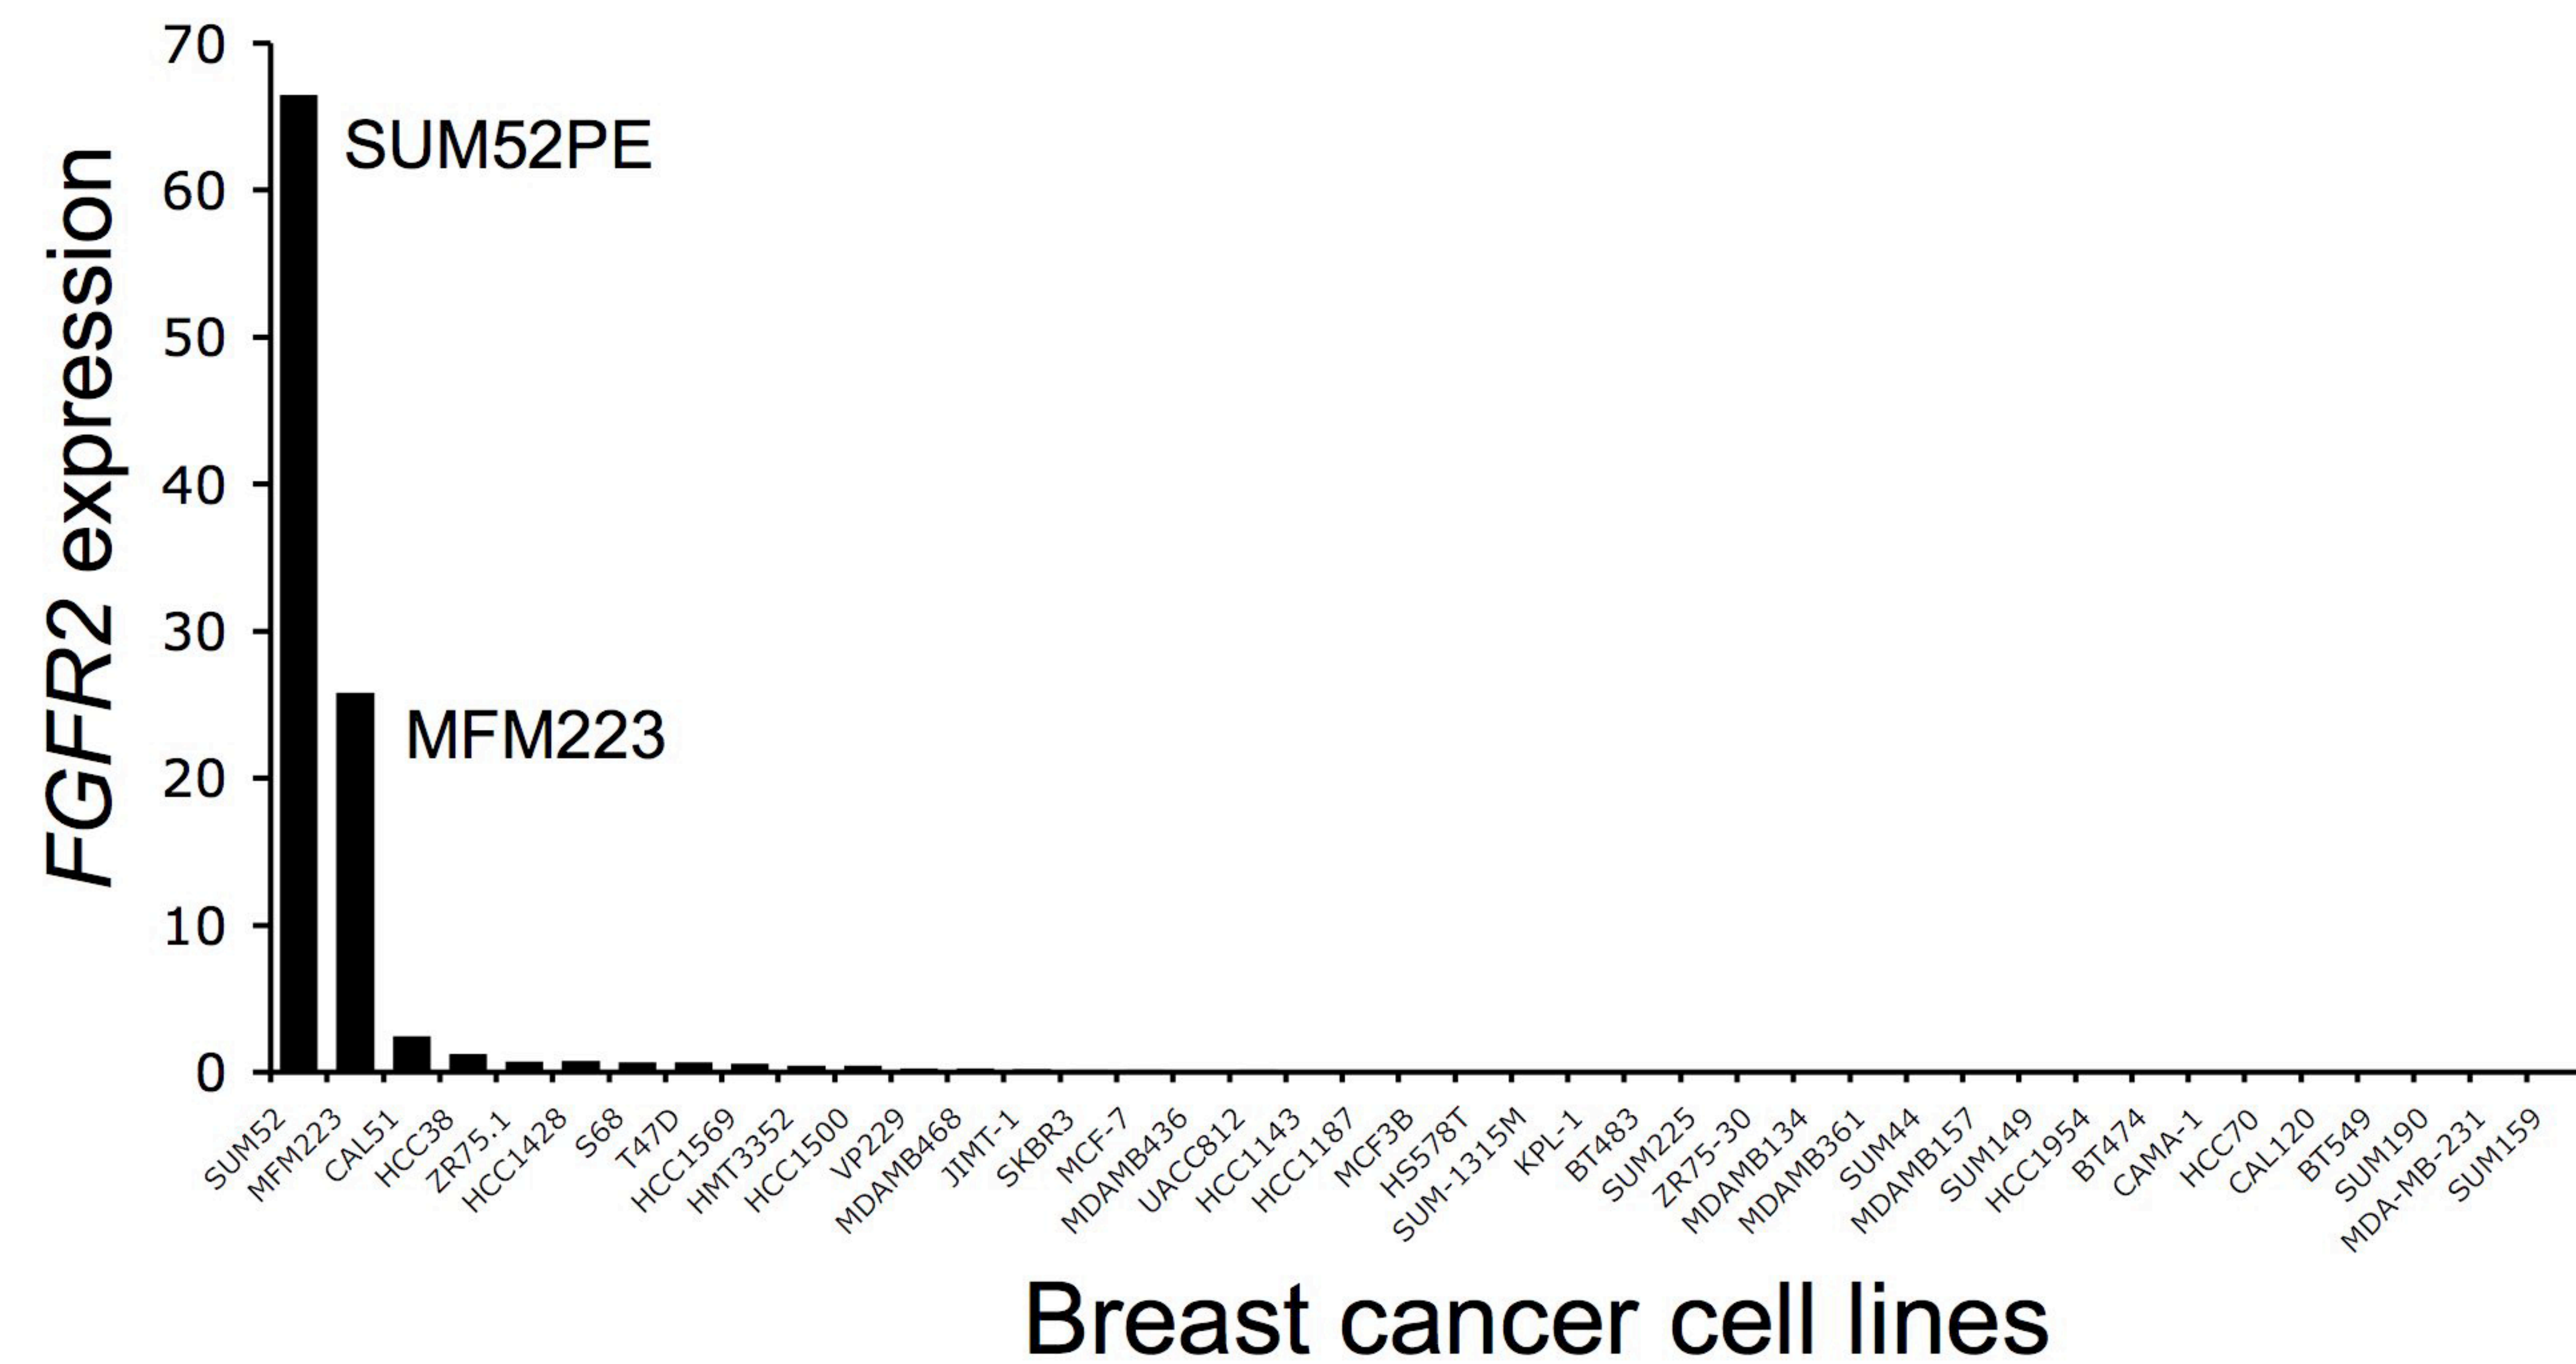

c

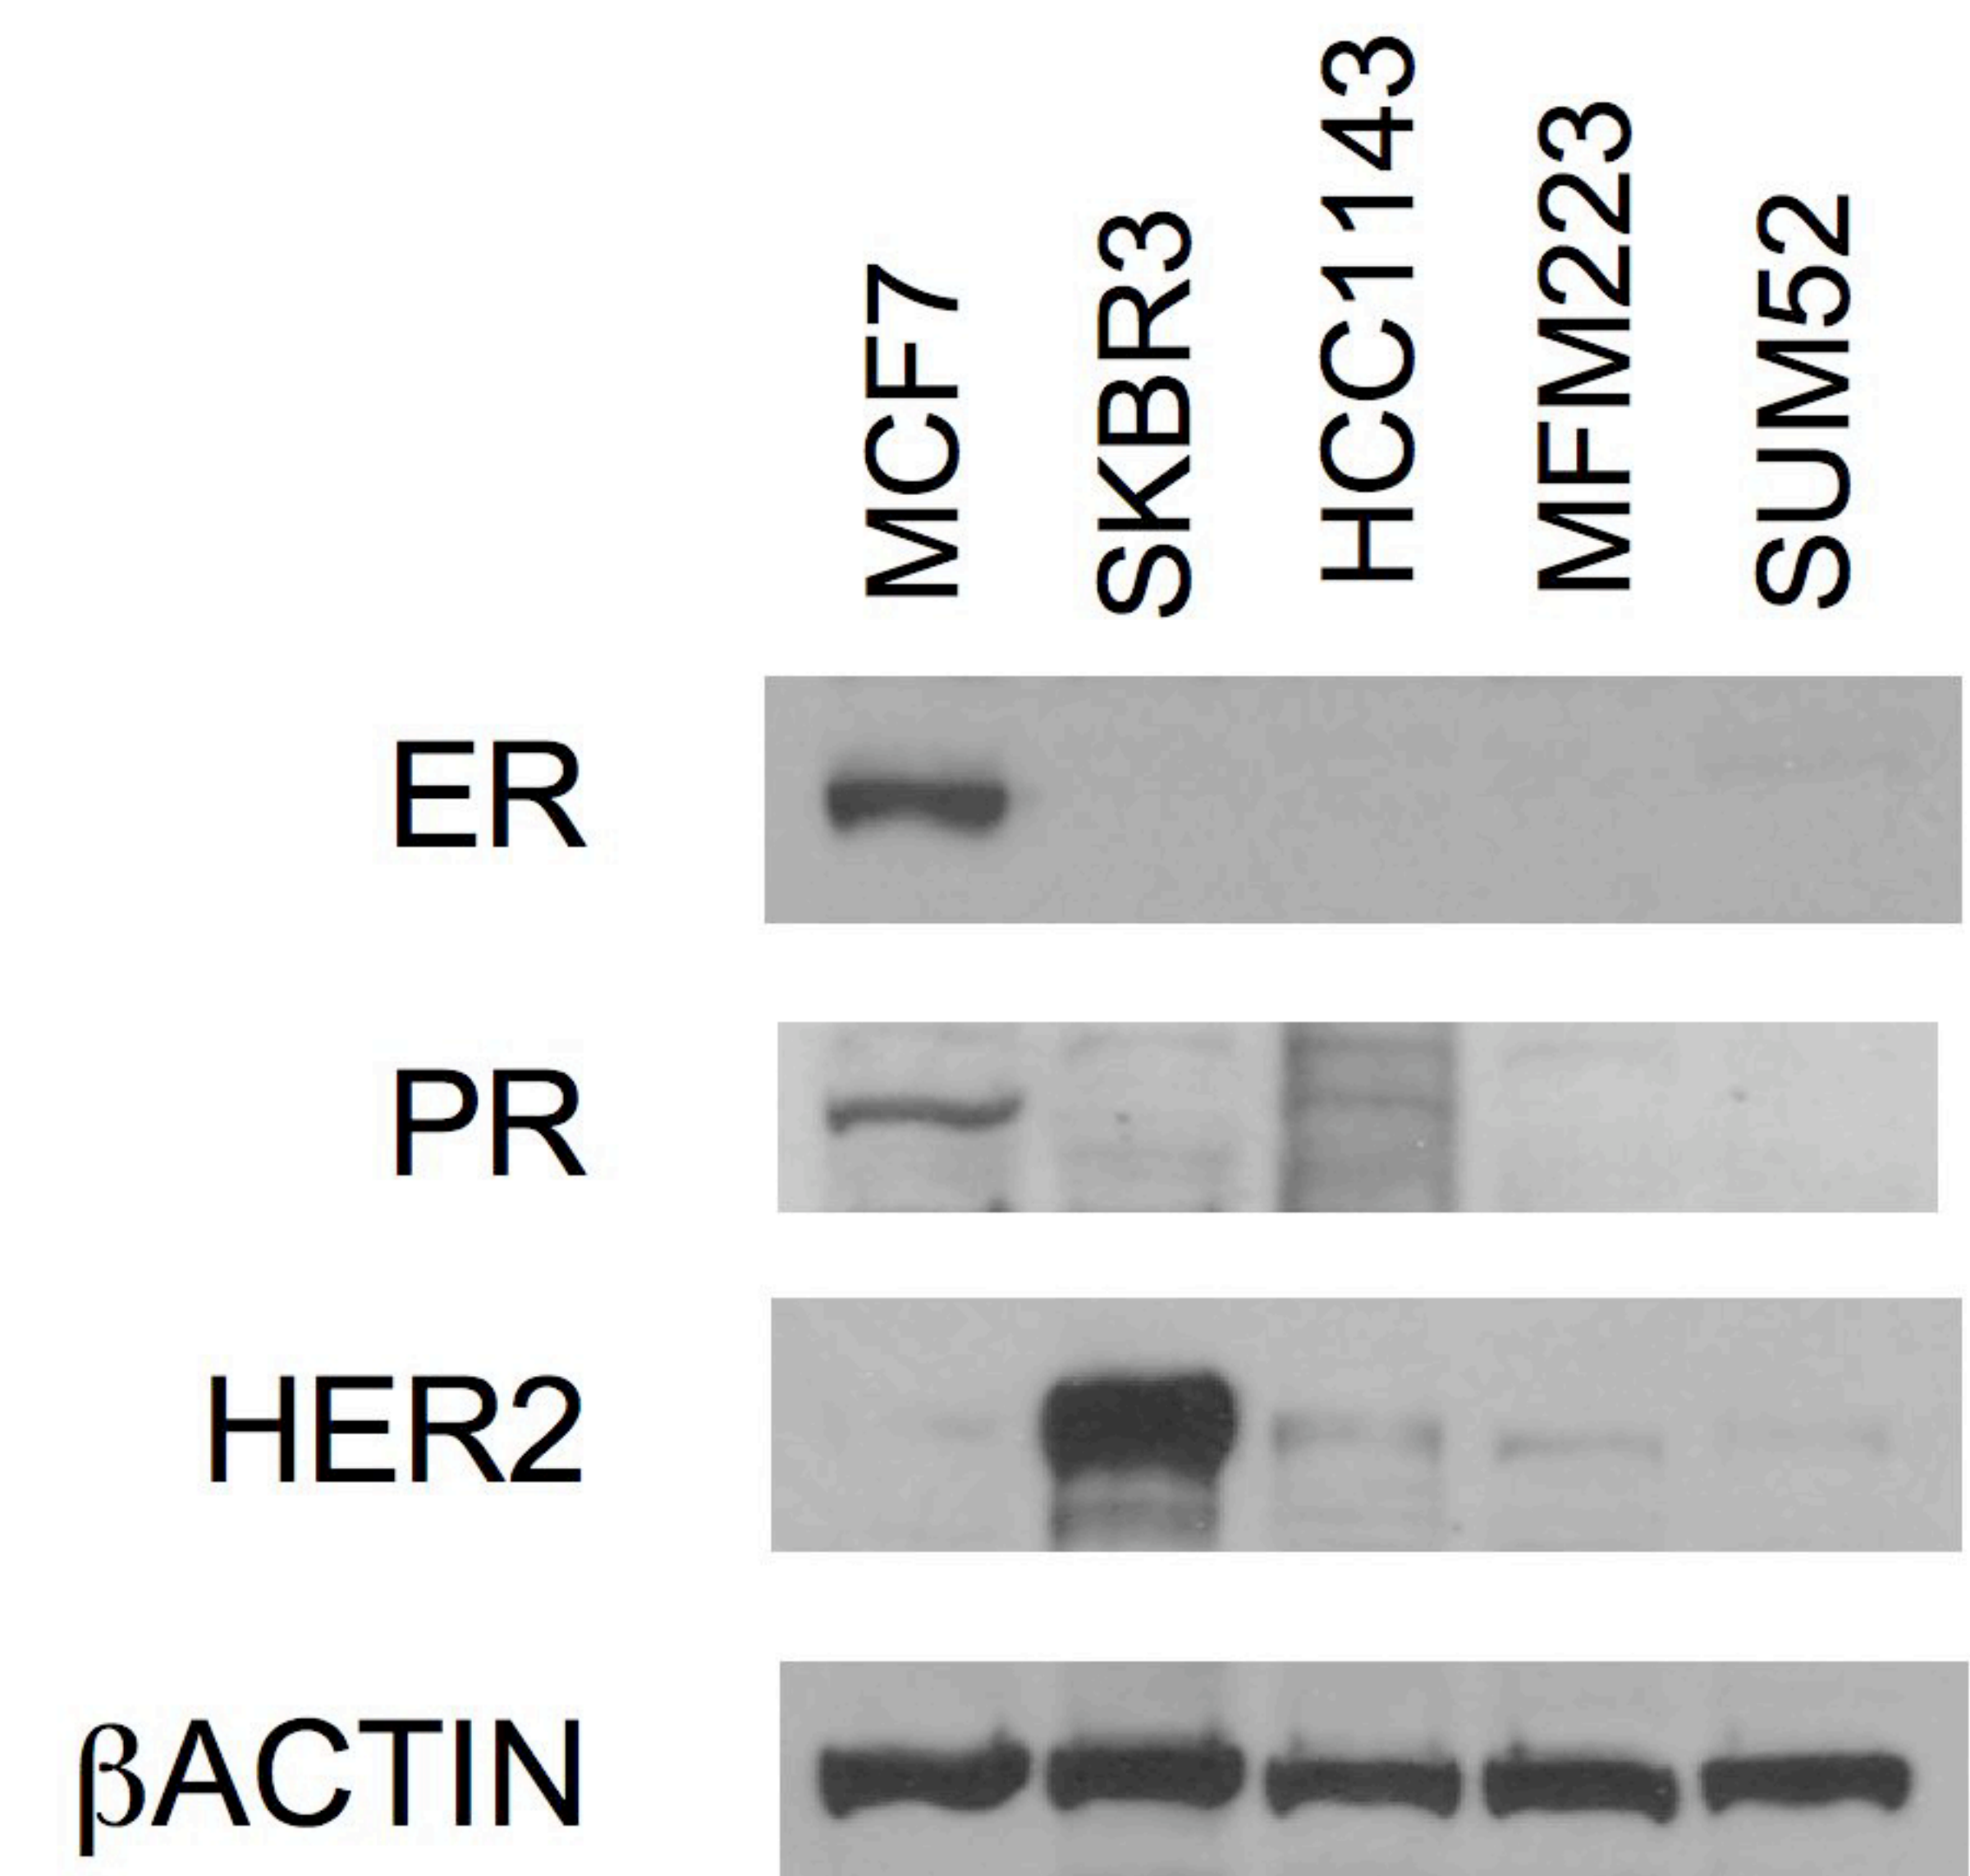

# Supplementary figure 2

a

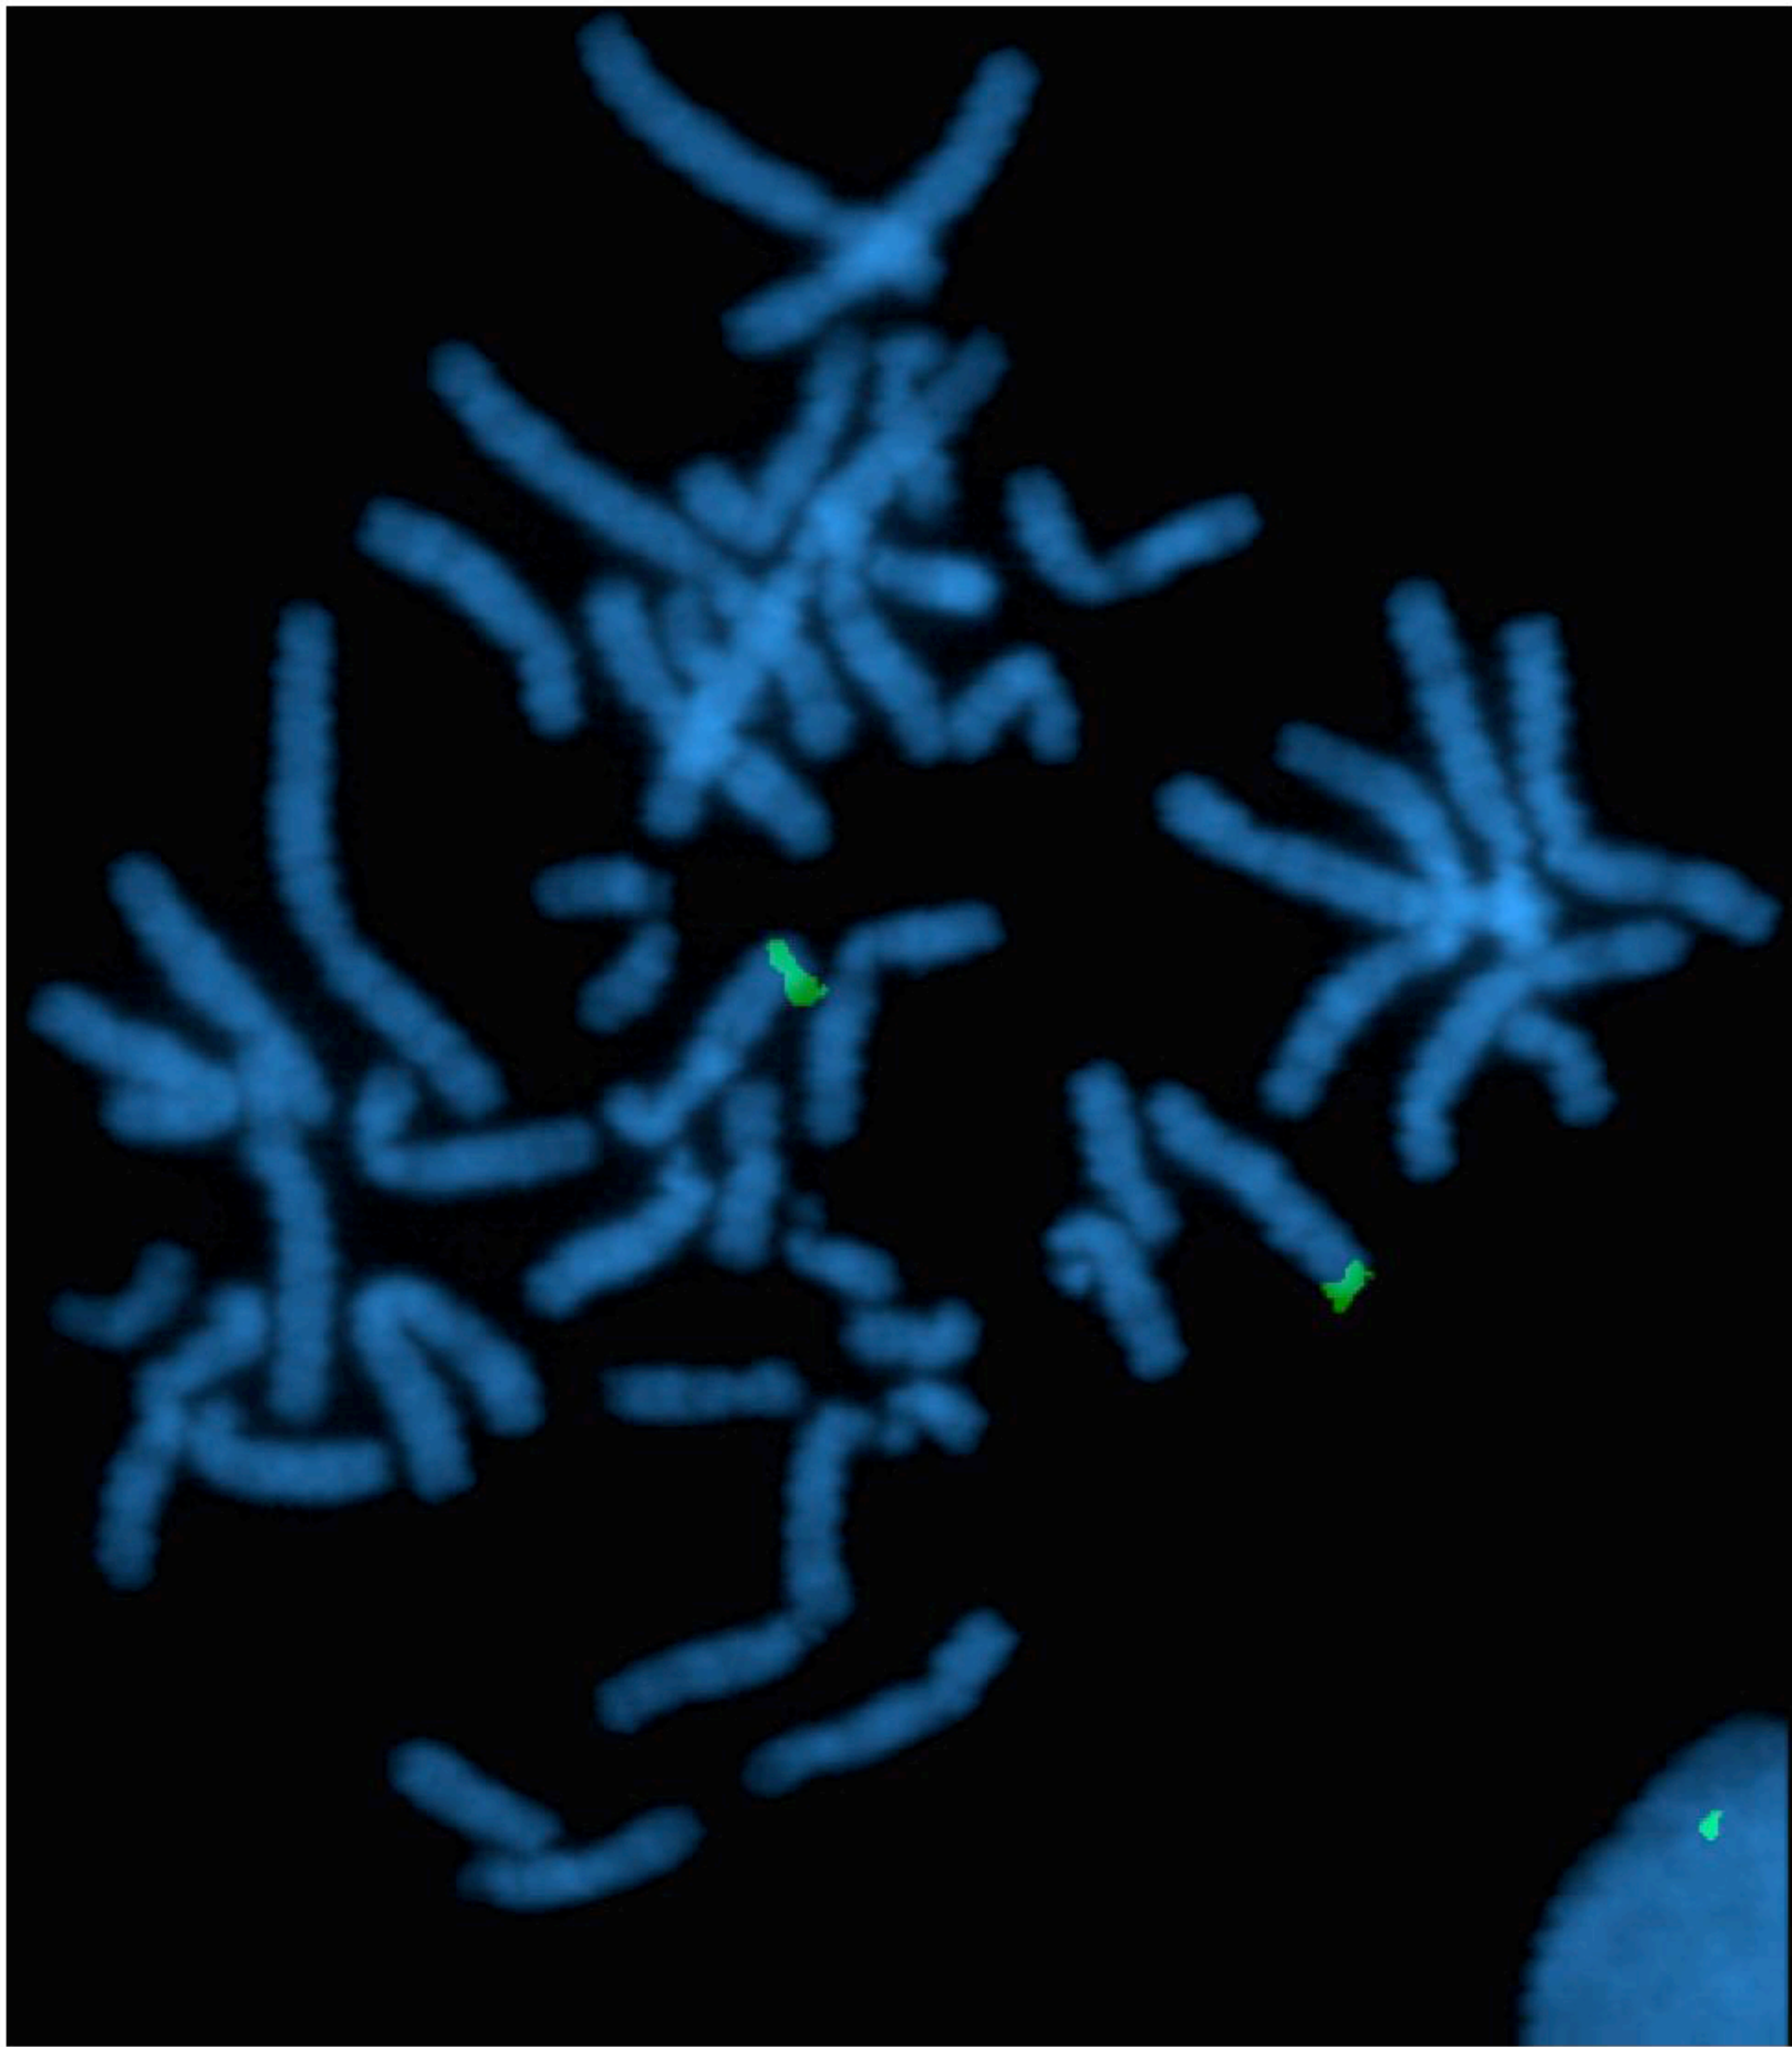

b

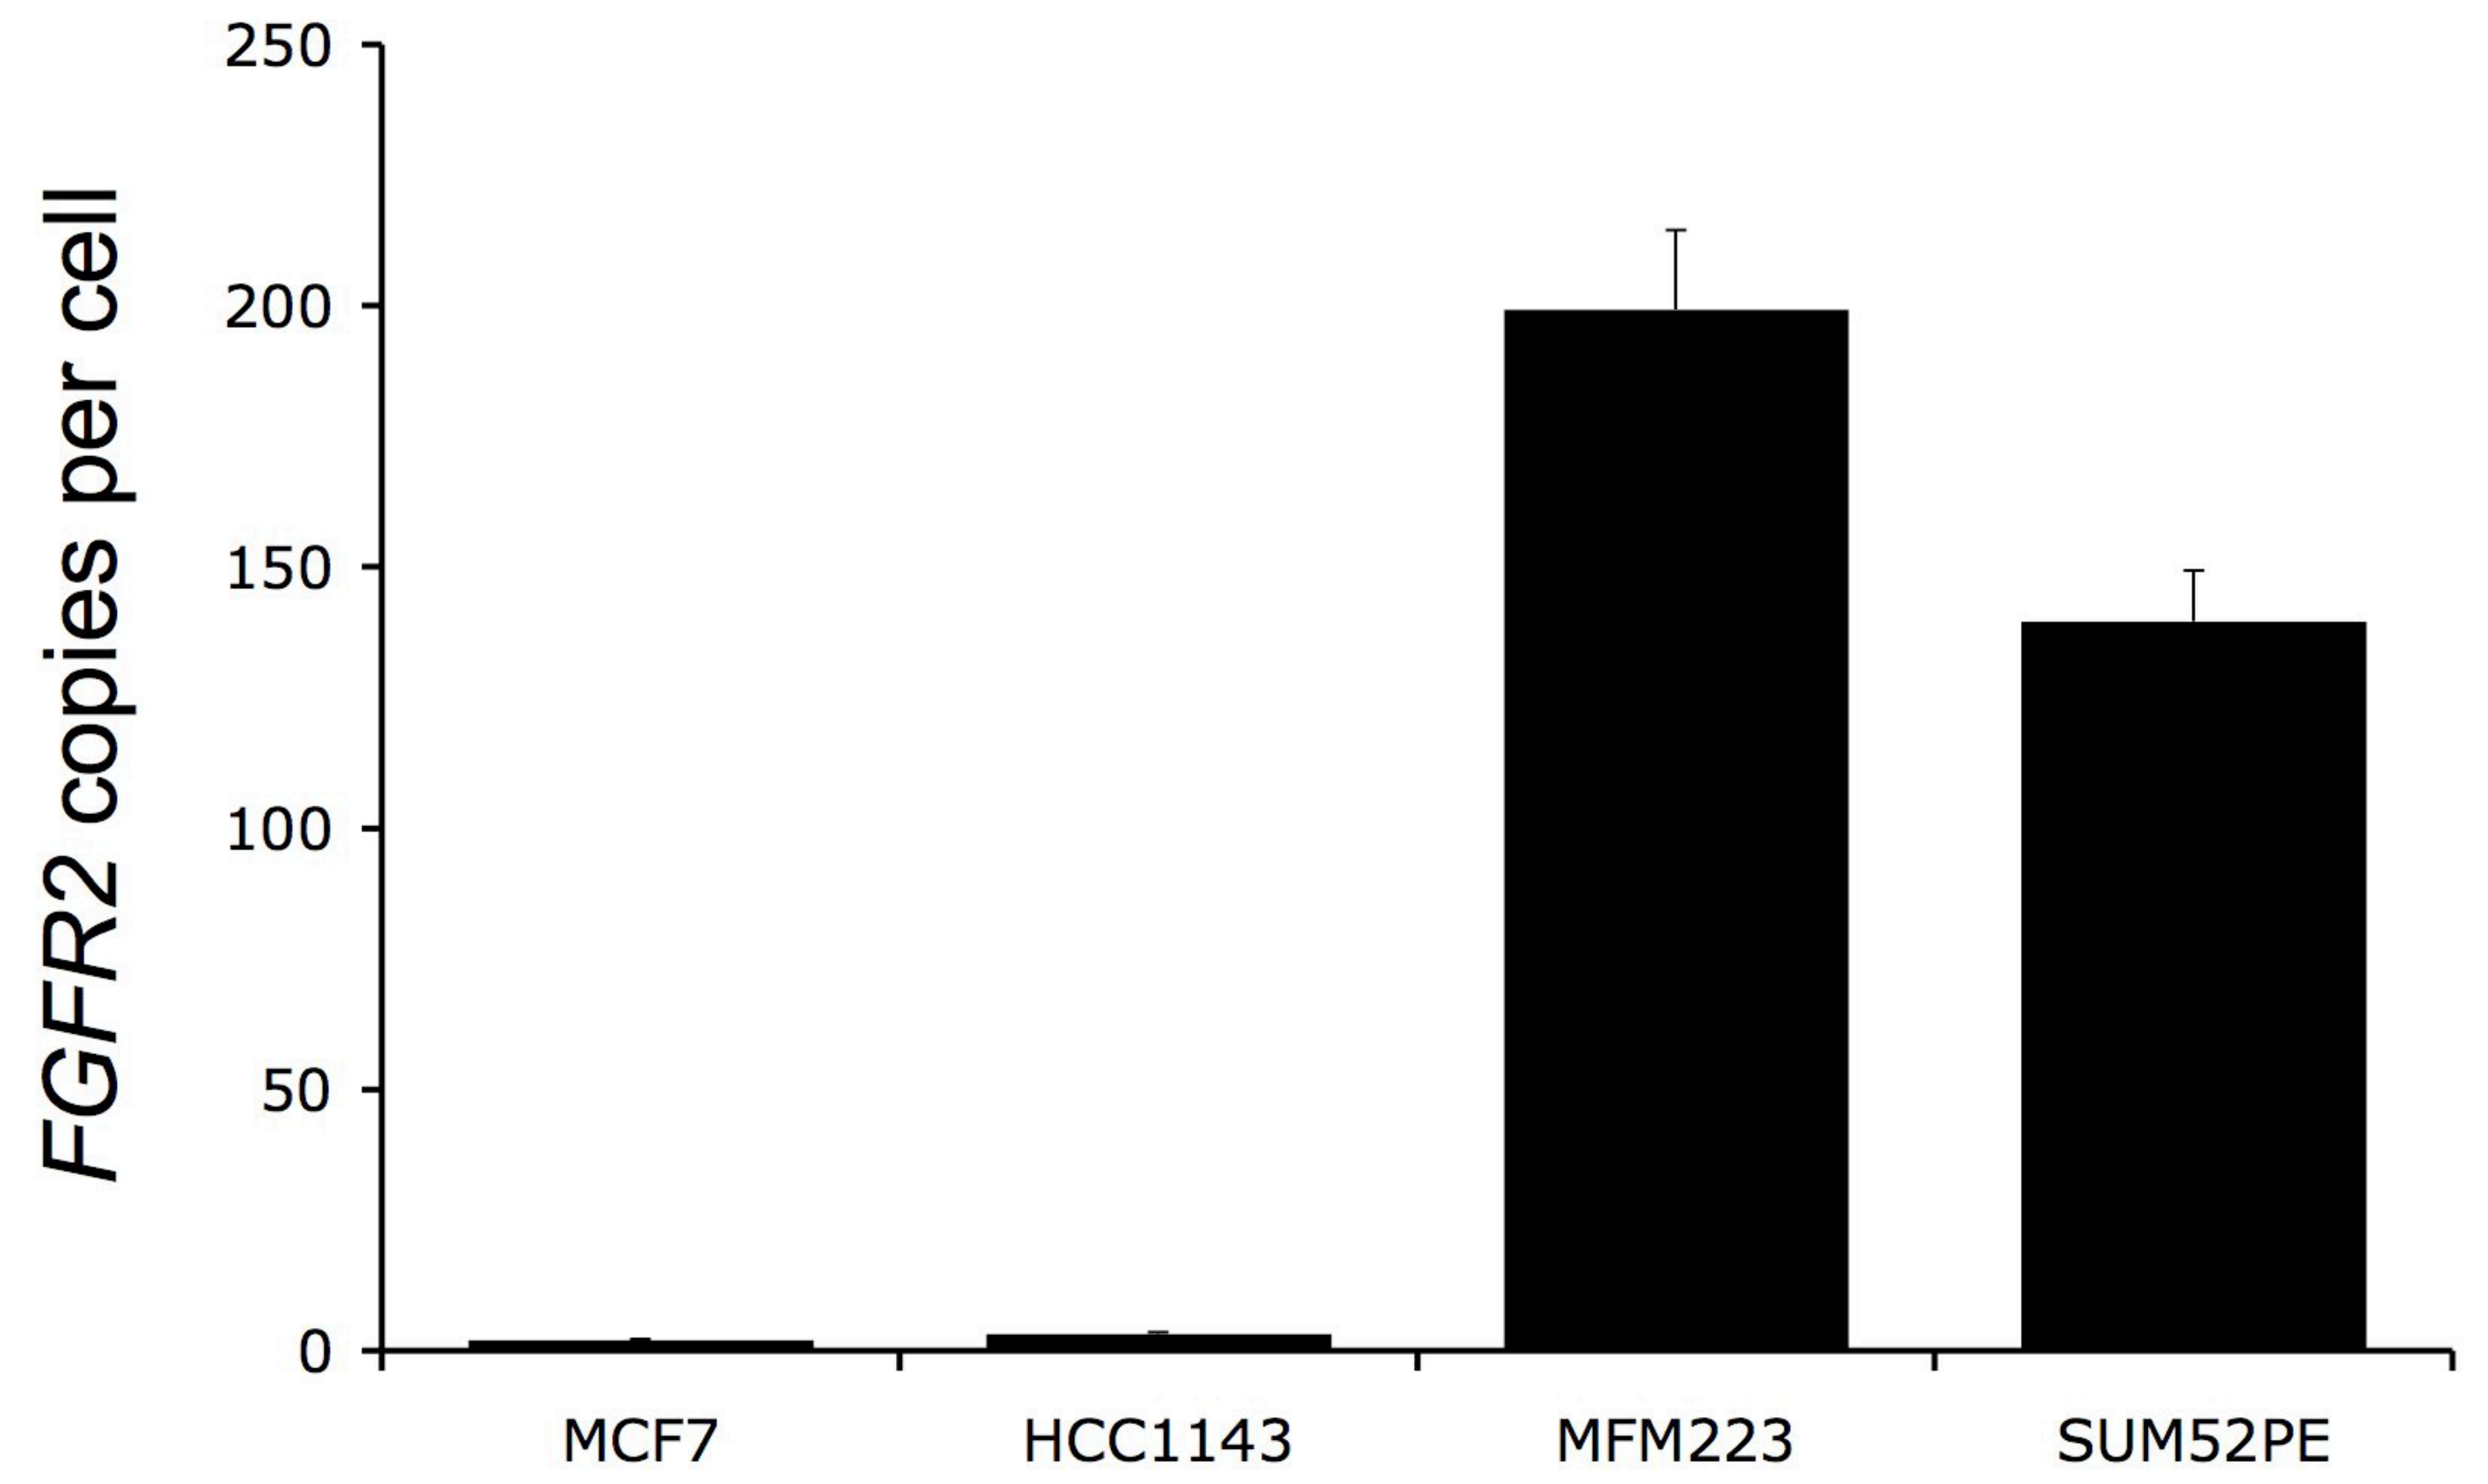

# Supplementary figure 3

a

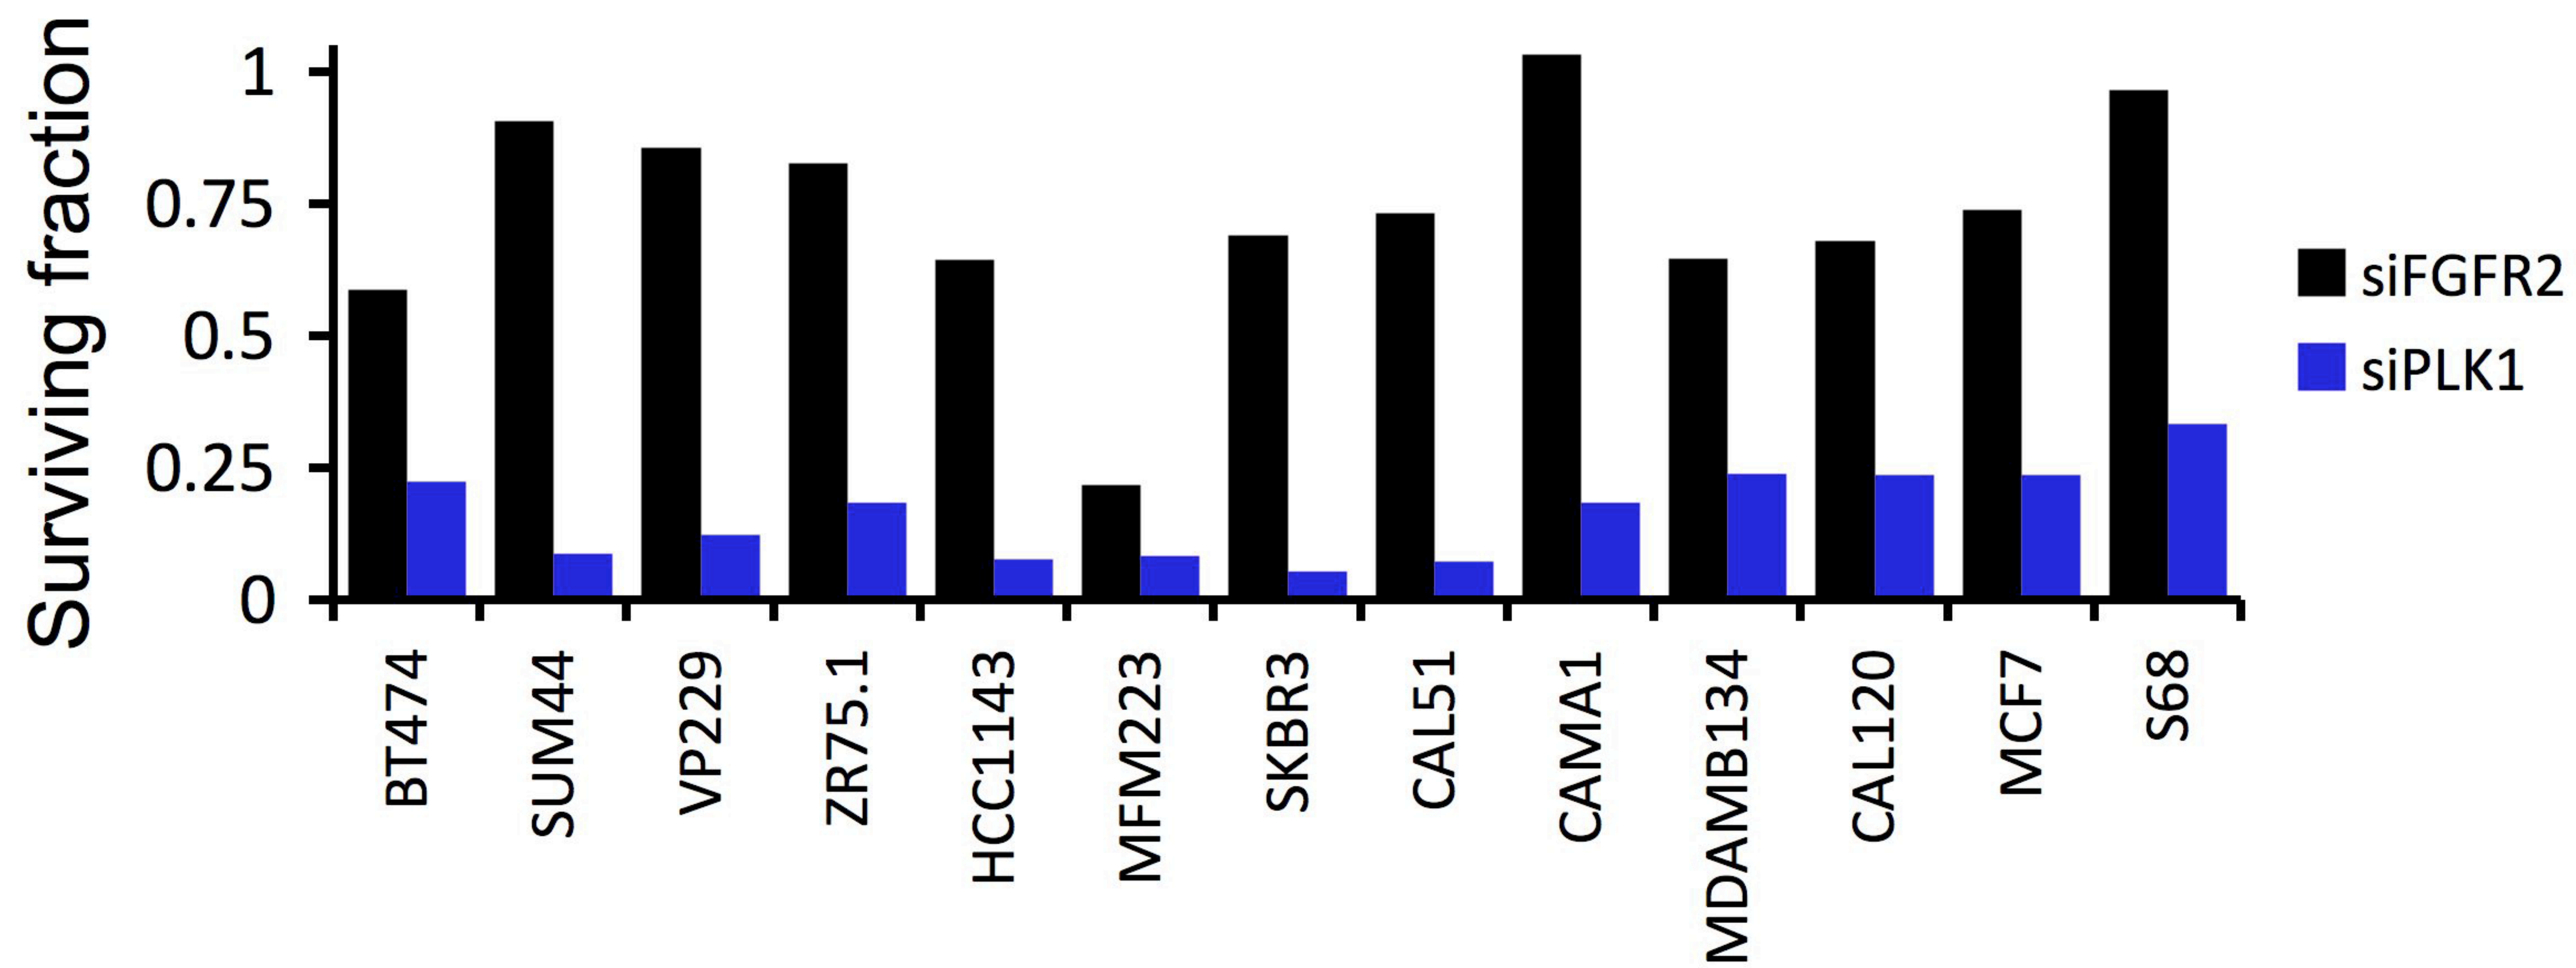

b

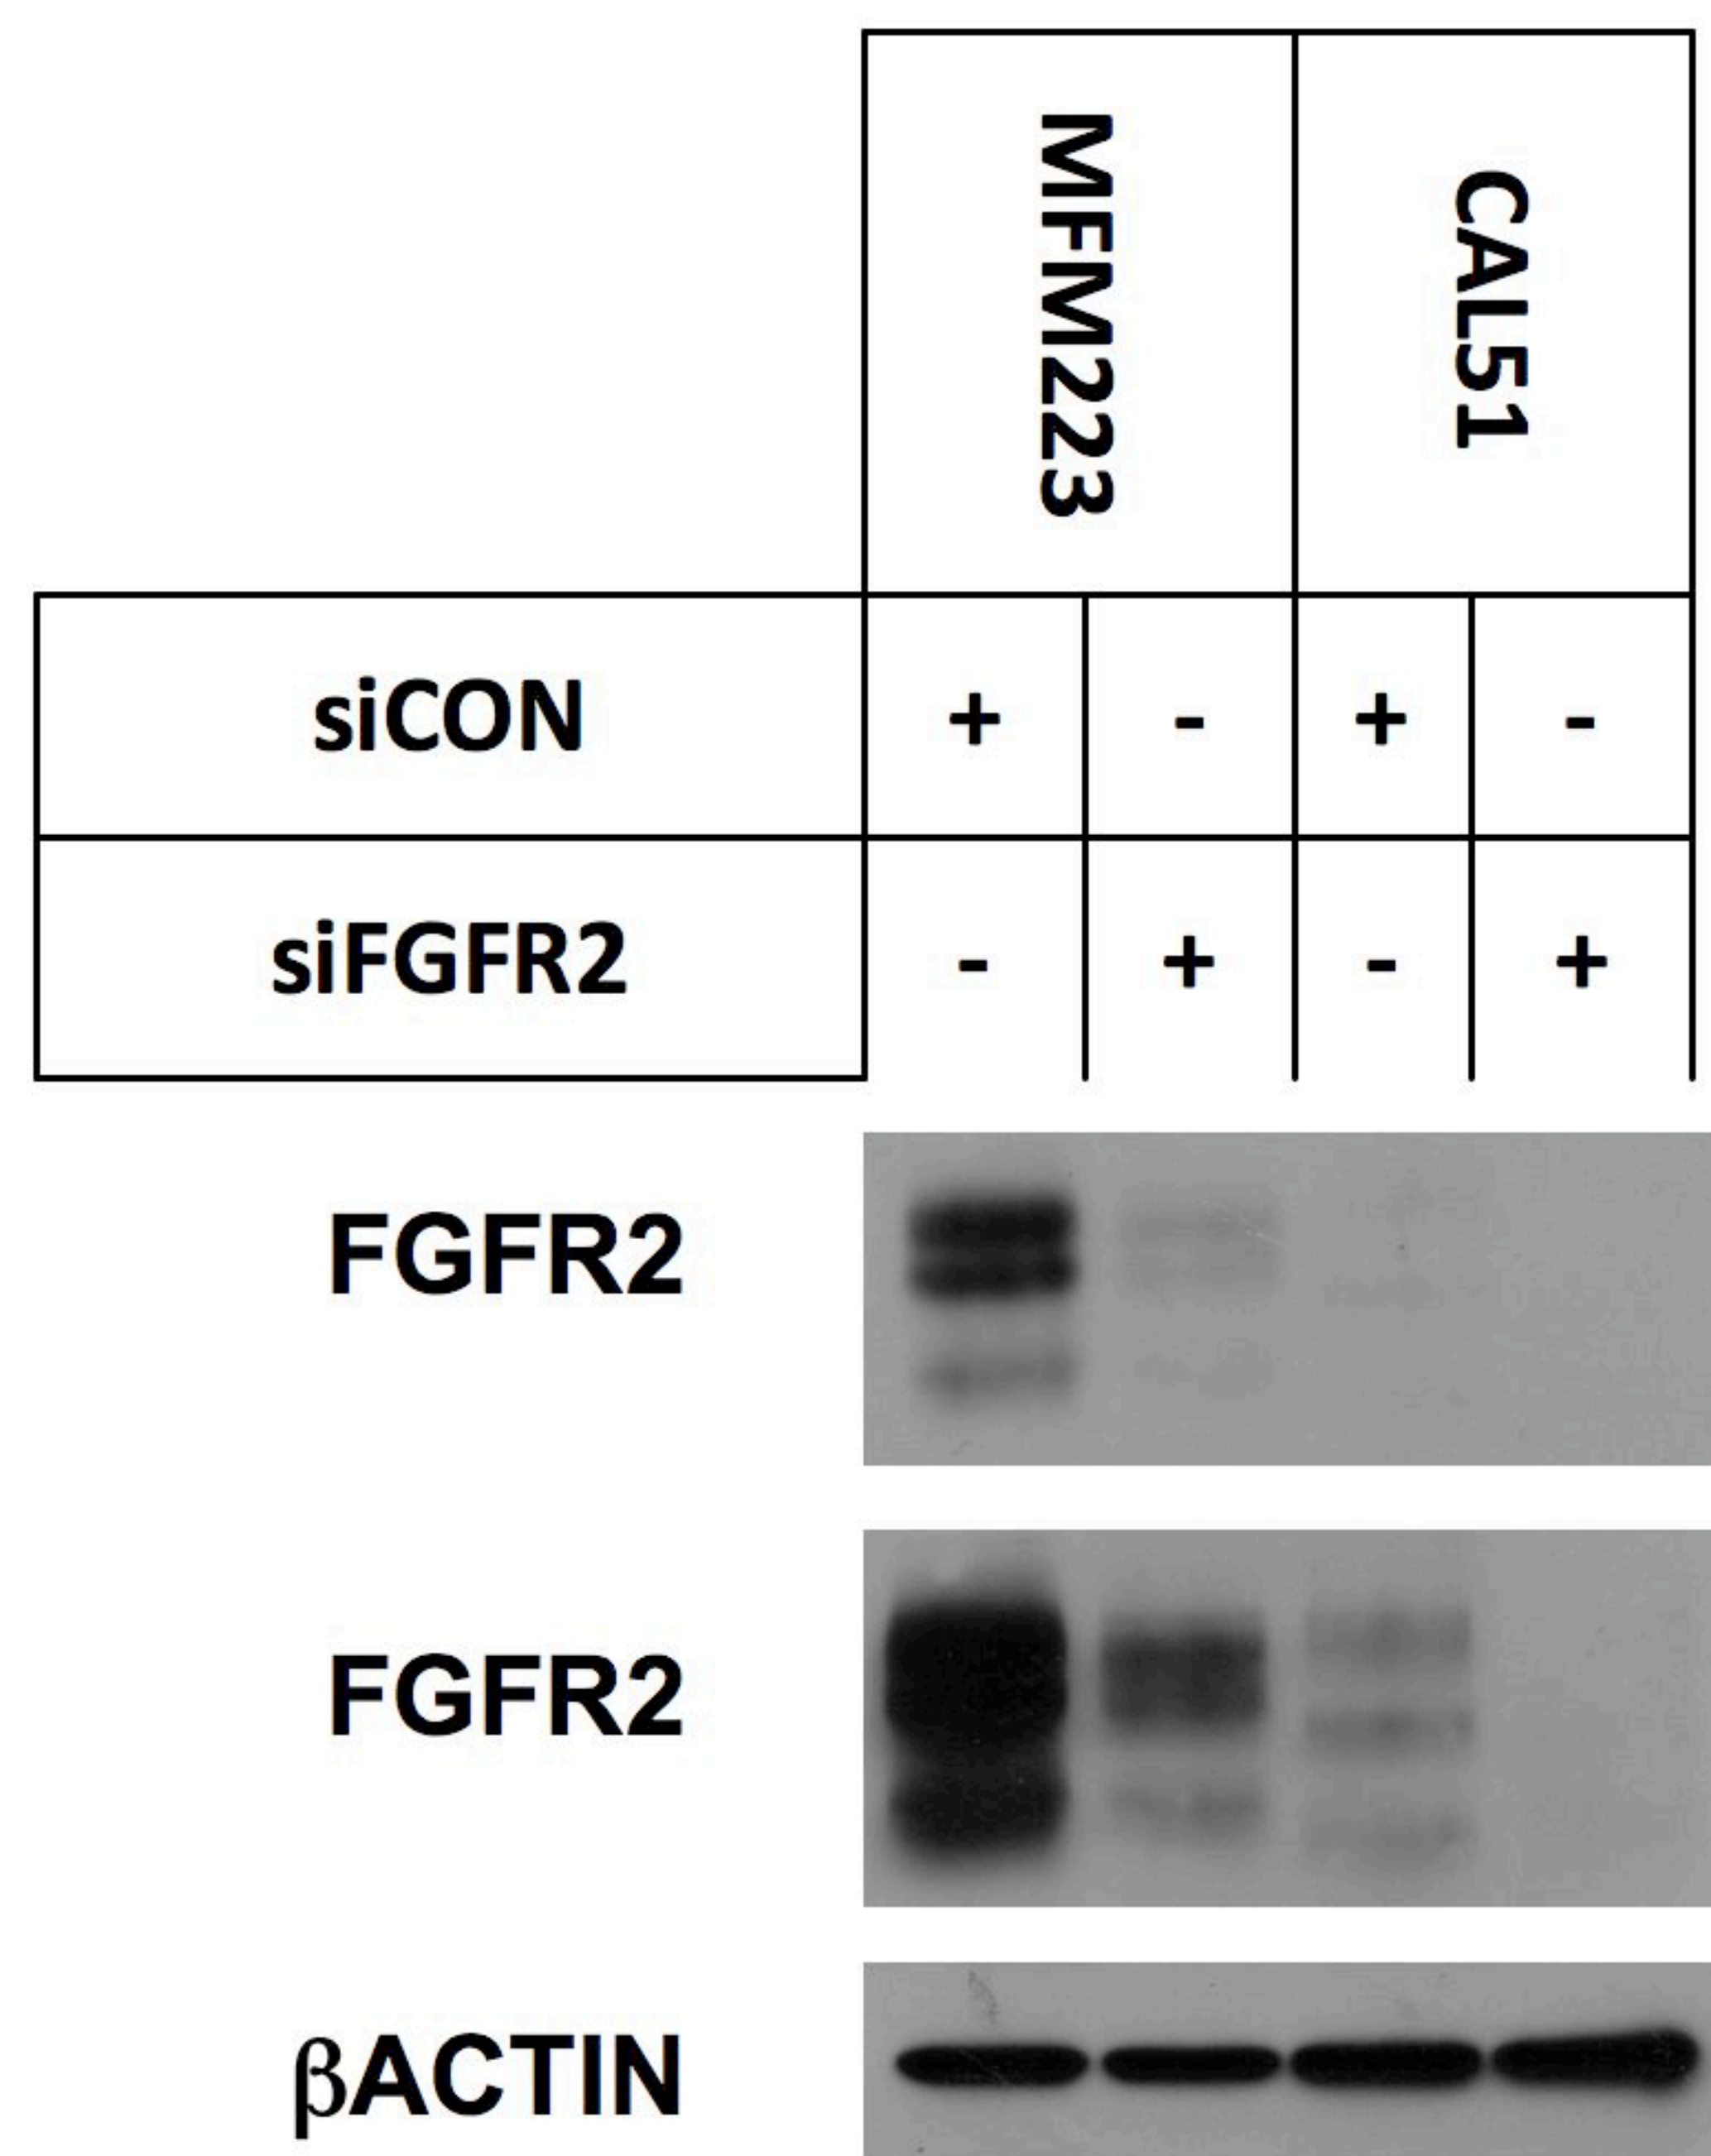

# Supplementary figure 4

a

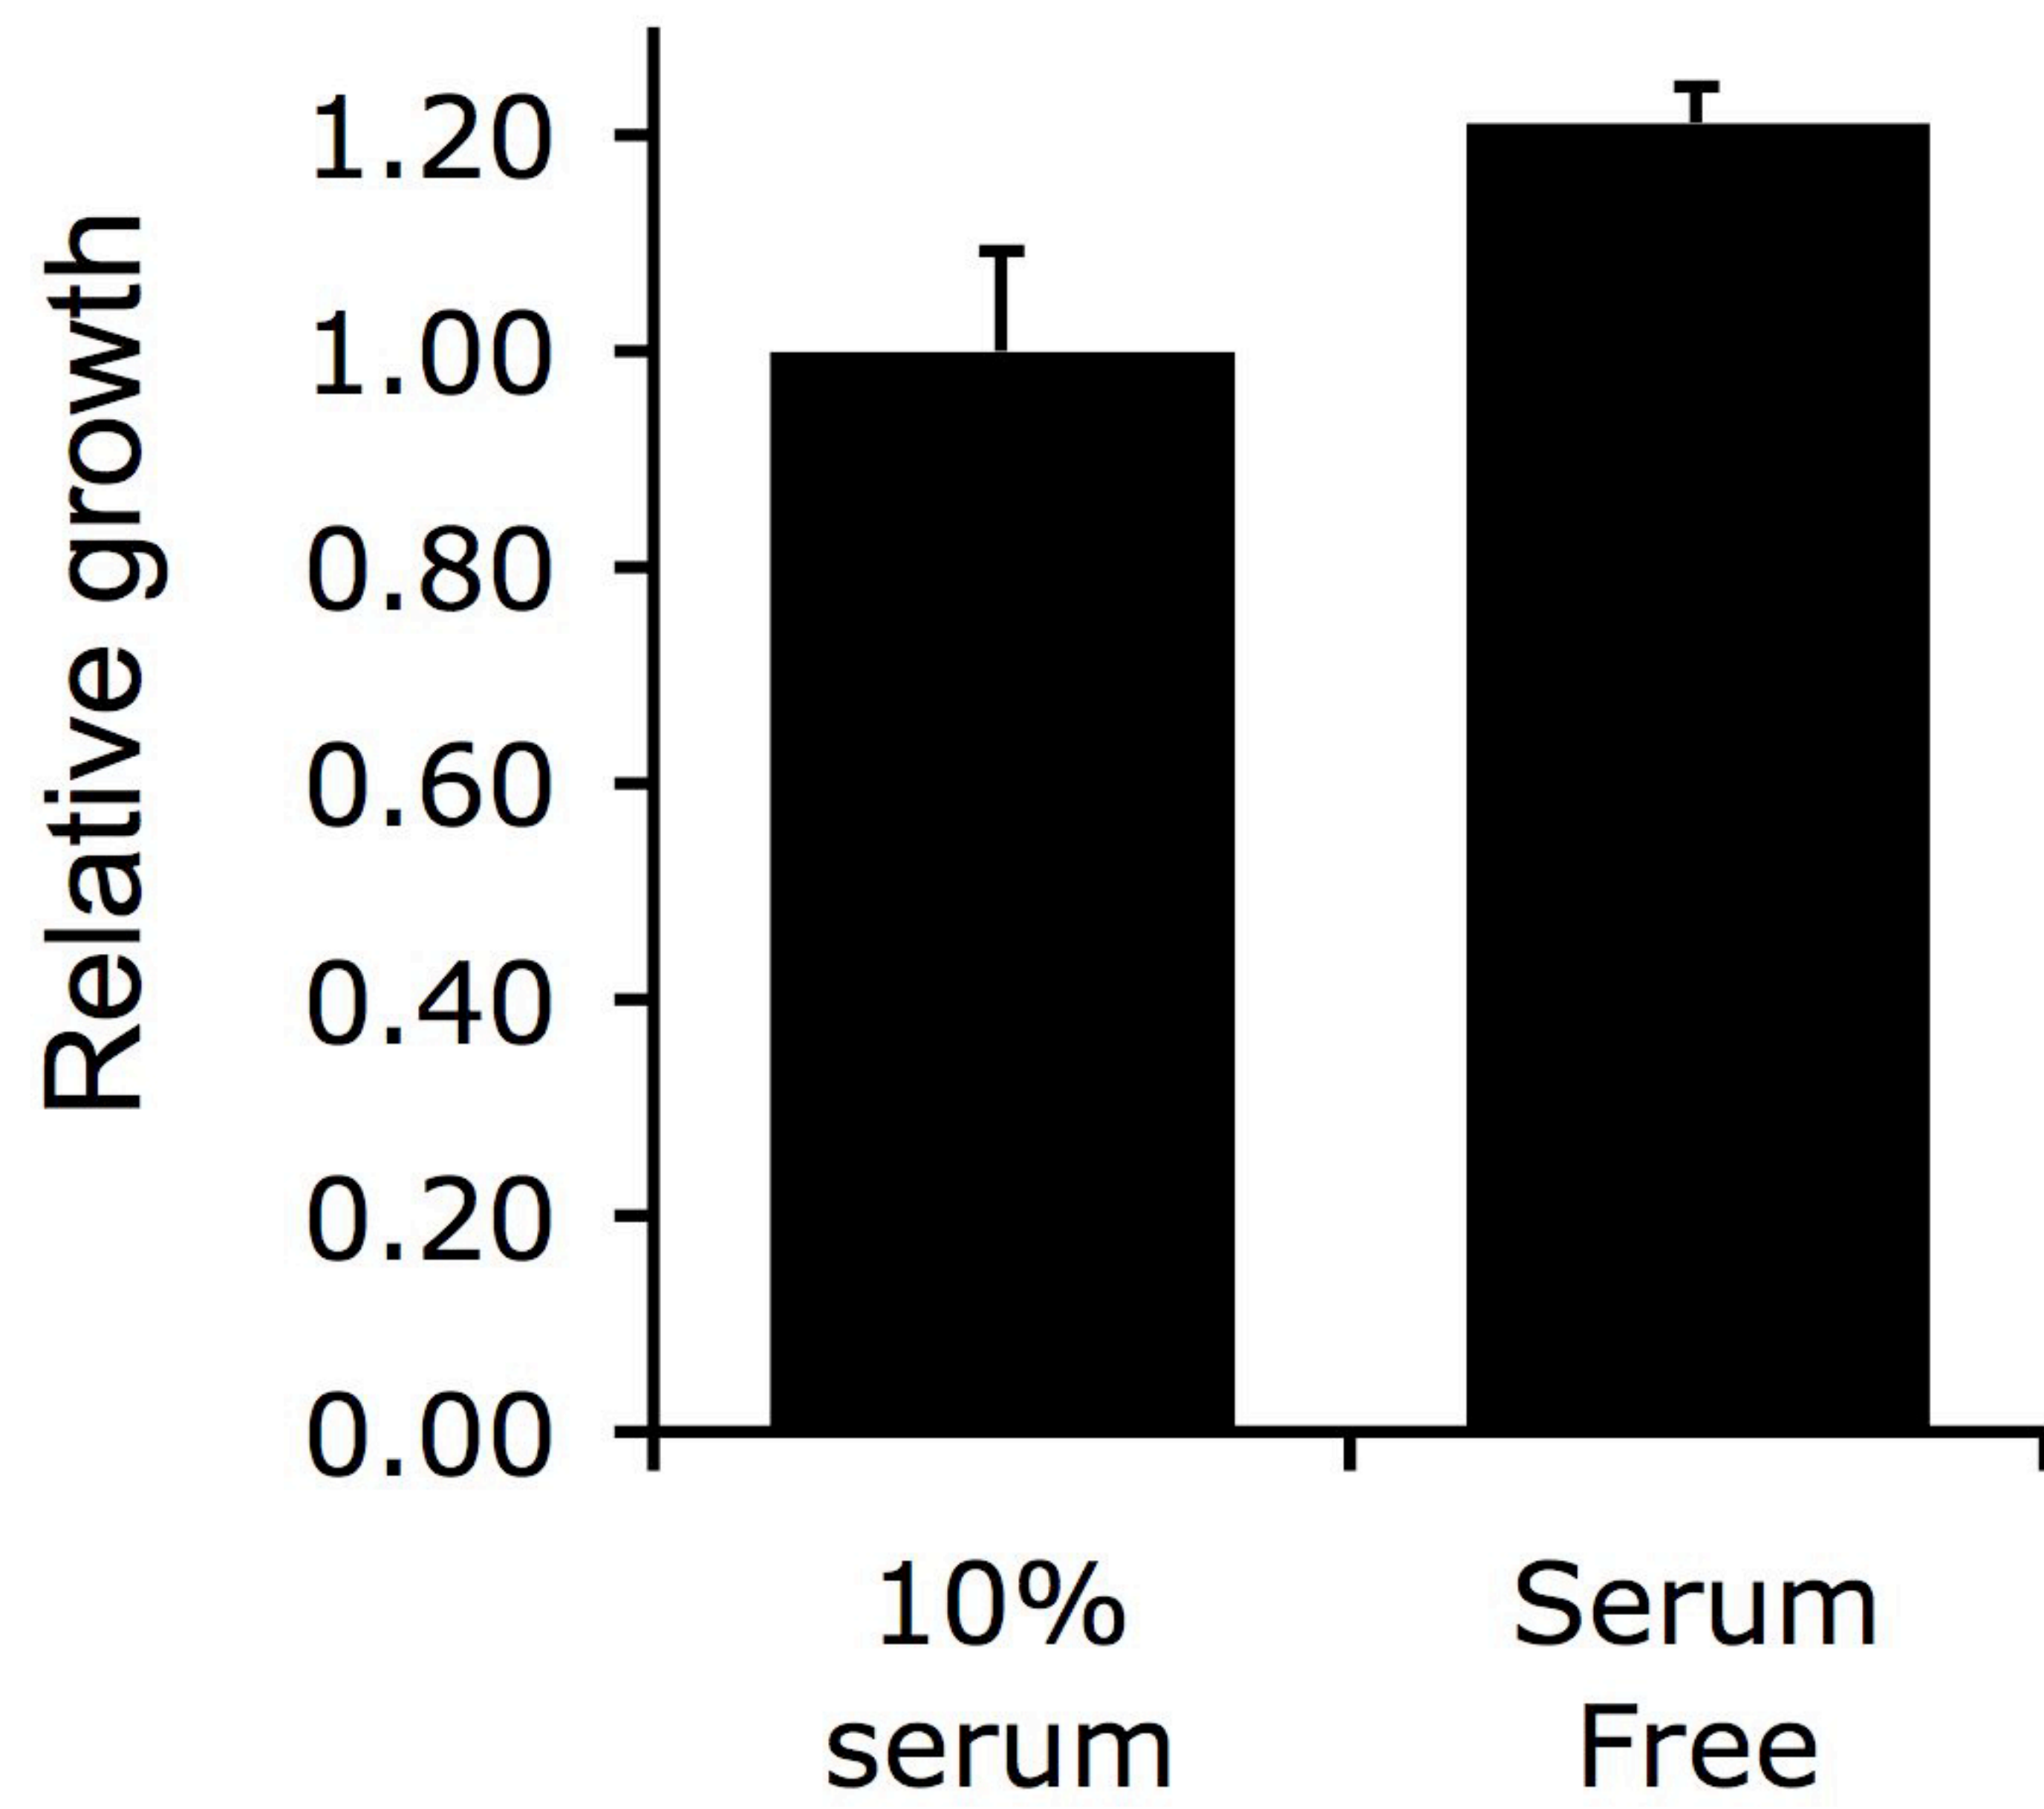

b

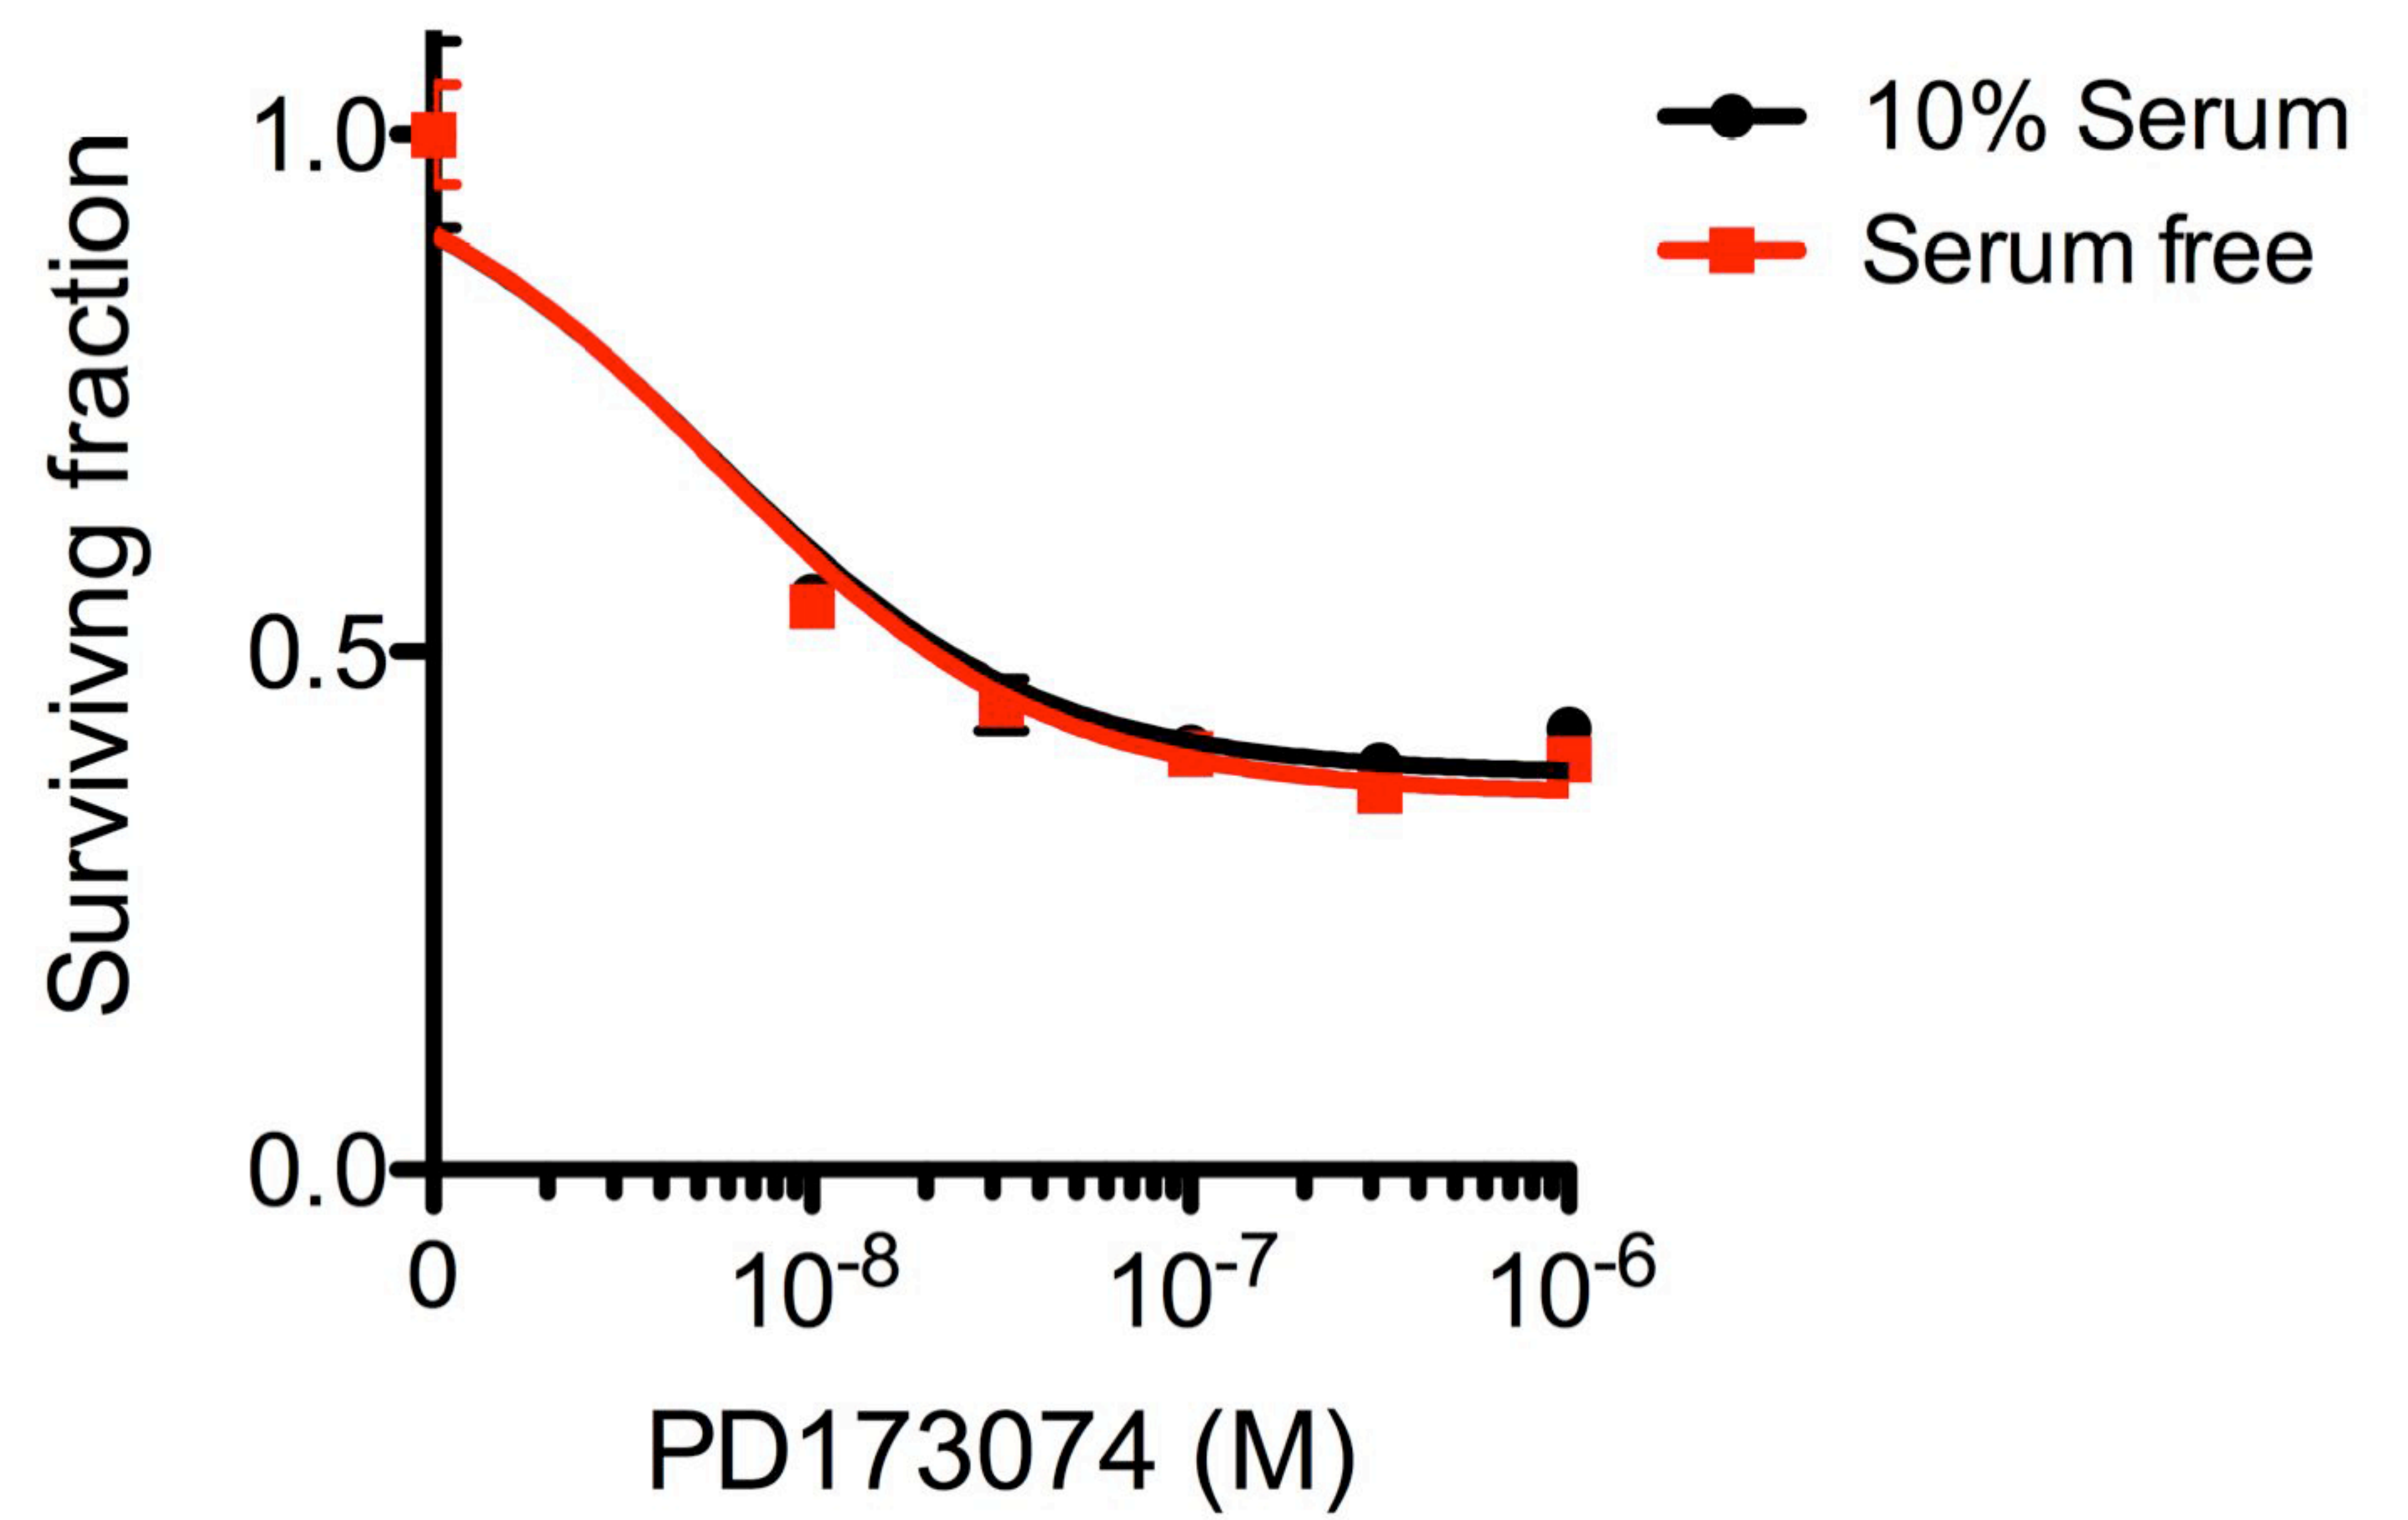

c

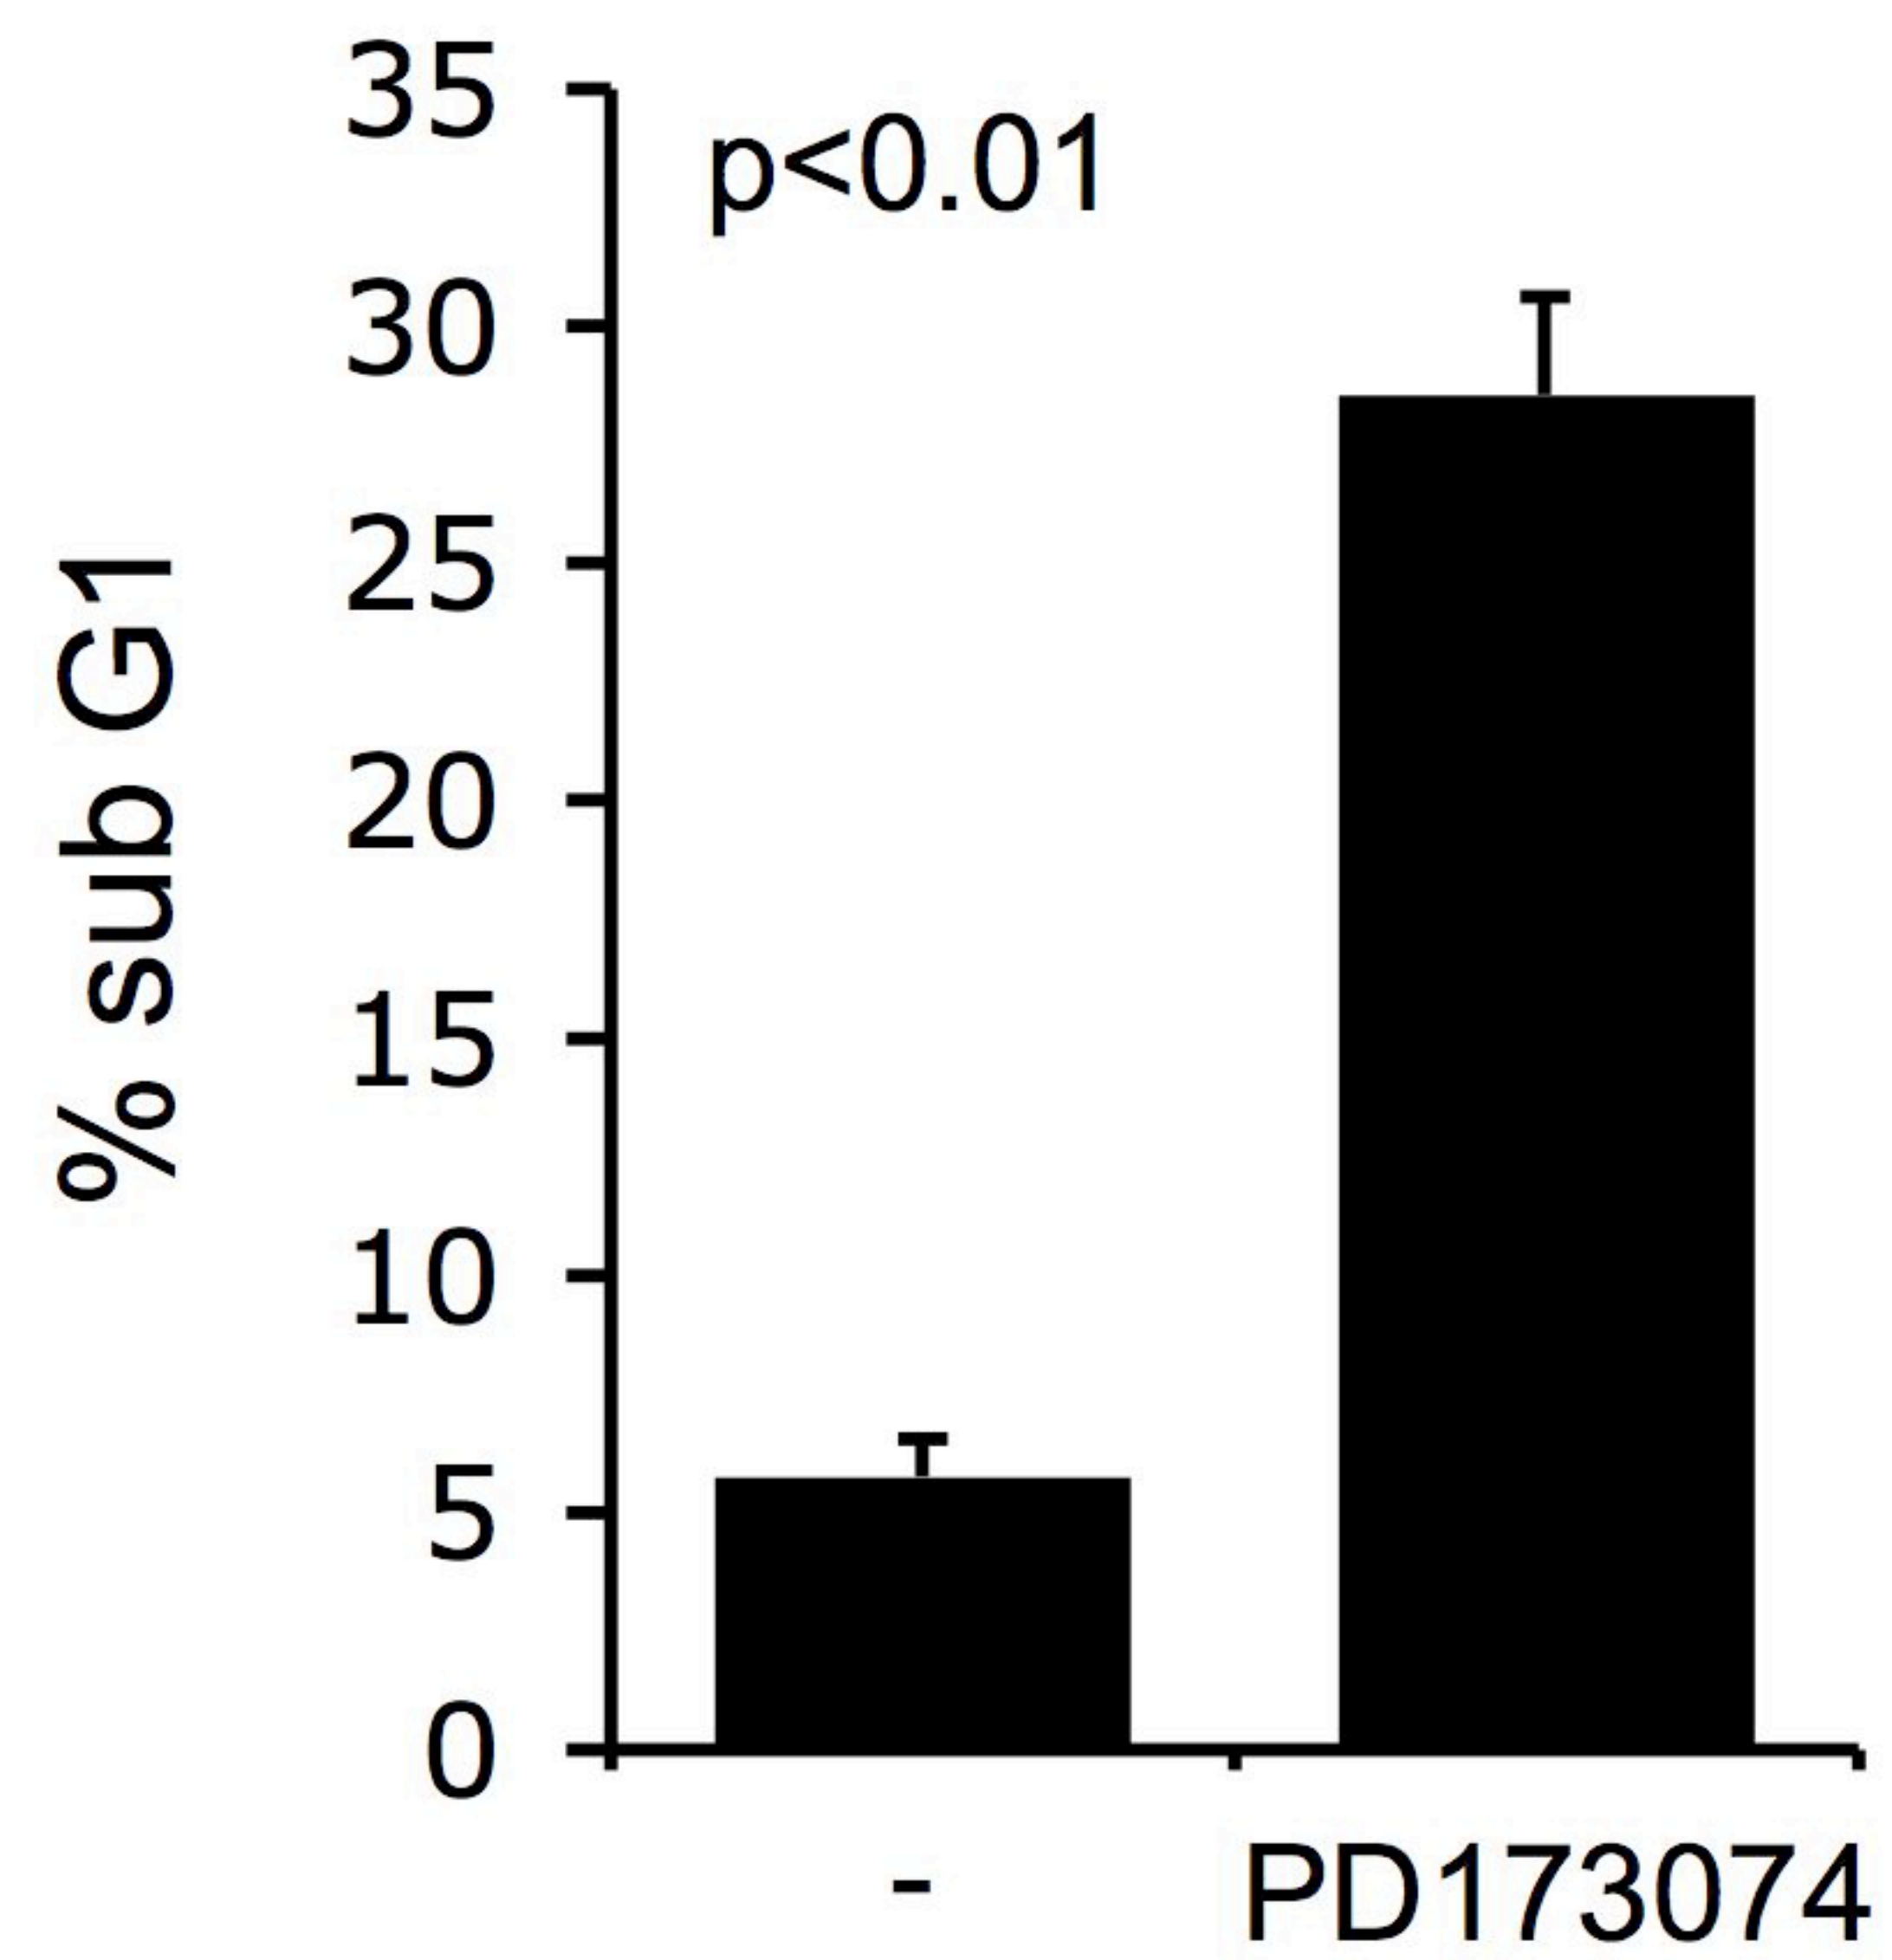

# Supplementary figure 5

a

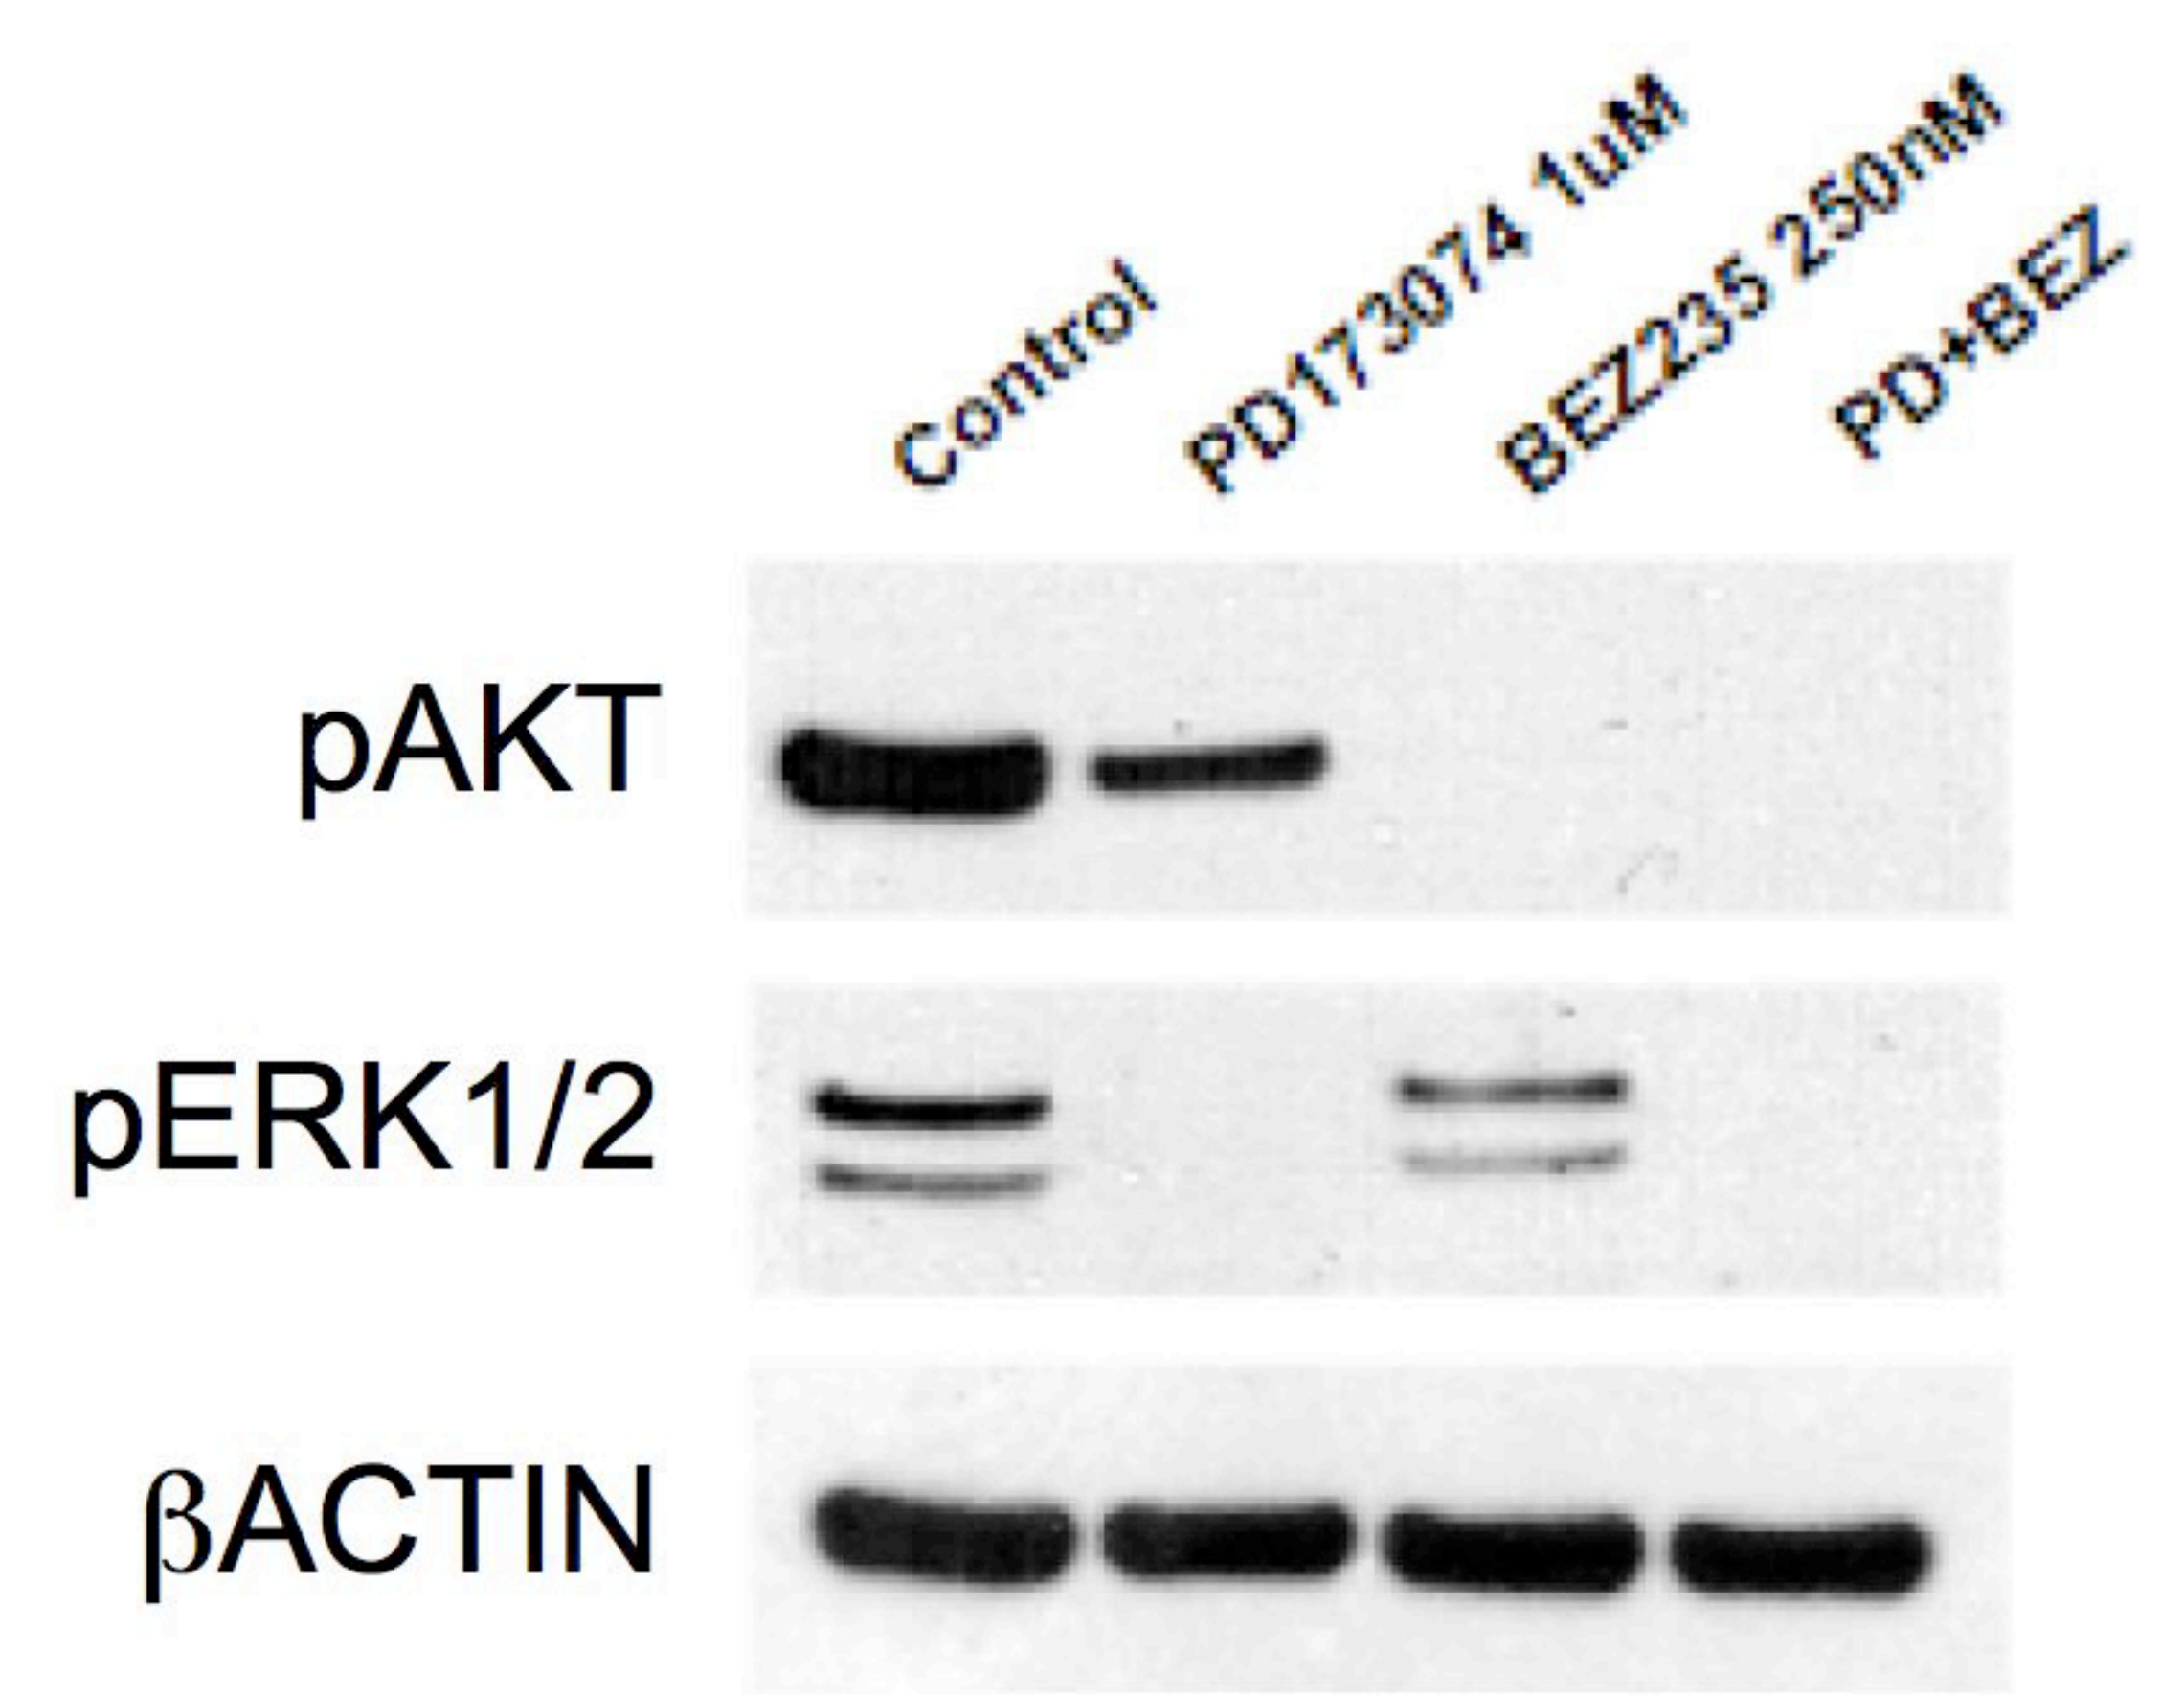

b

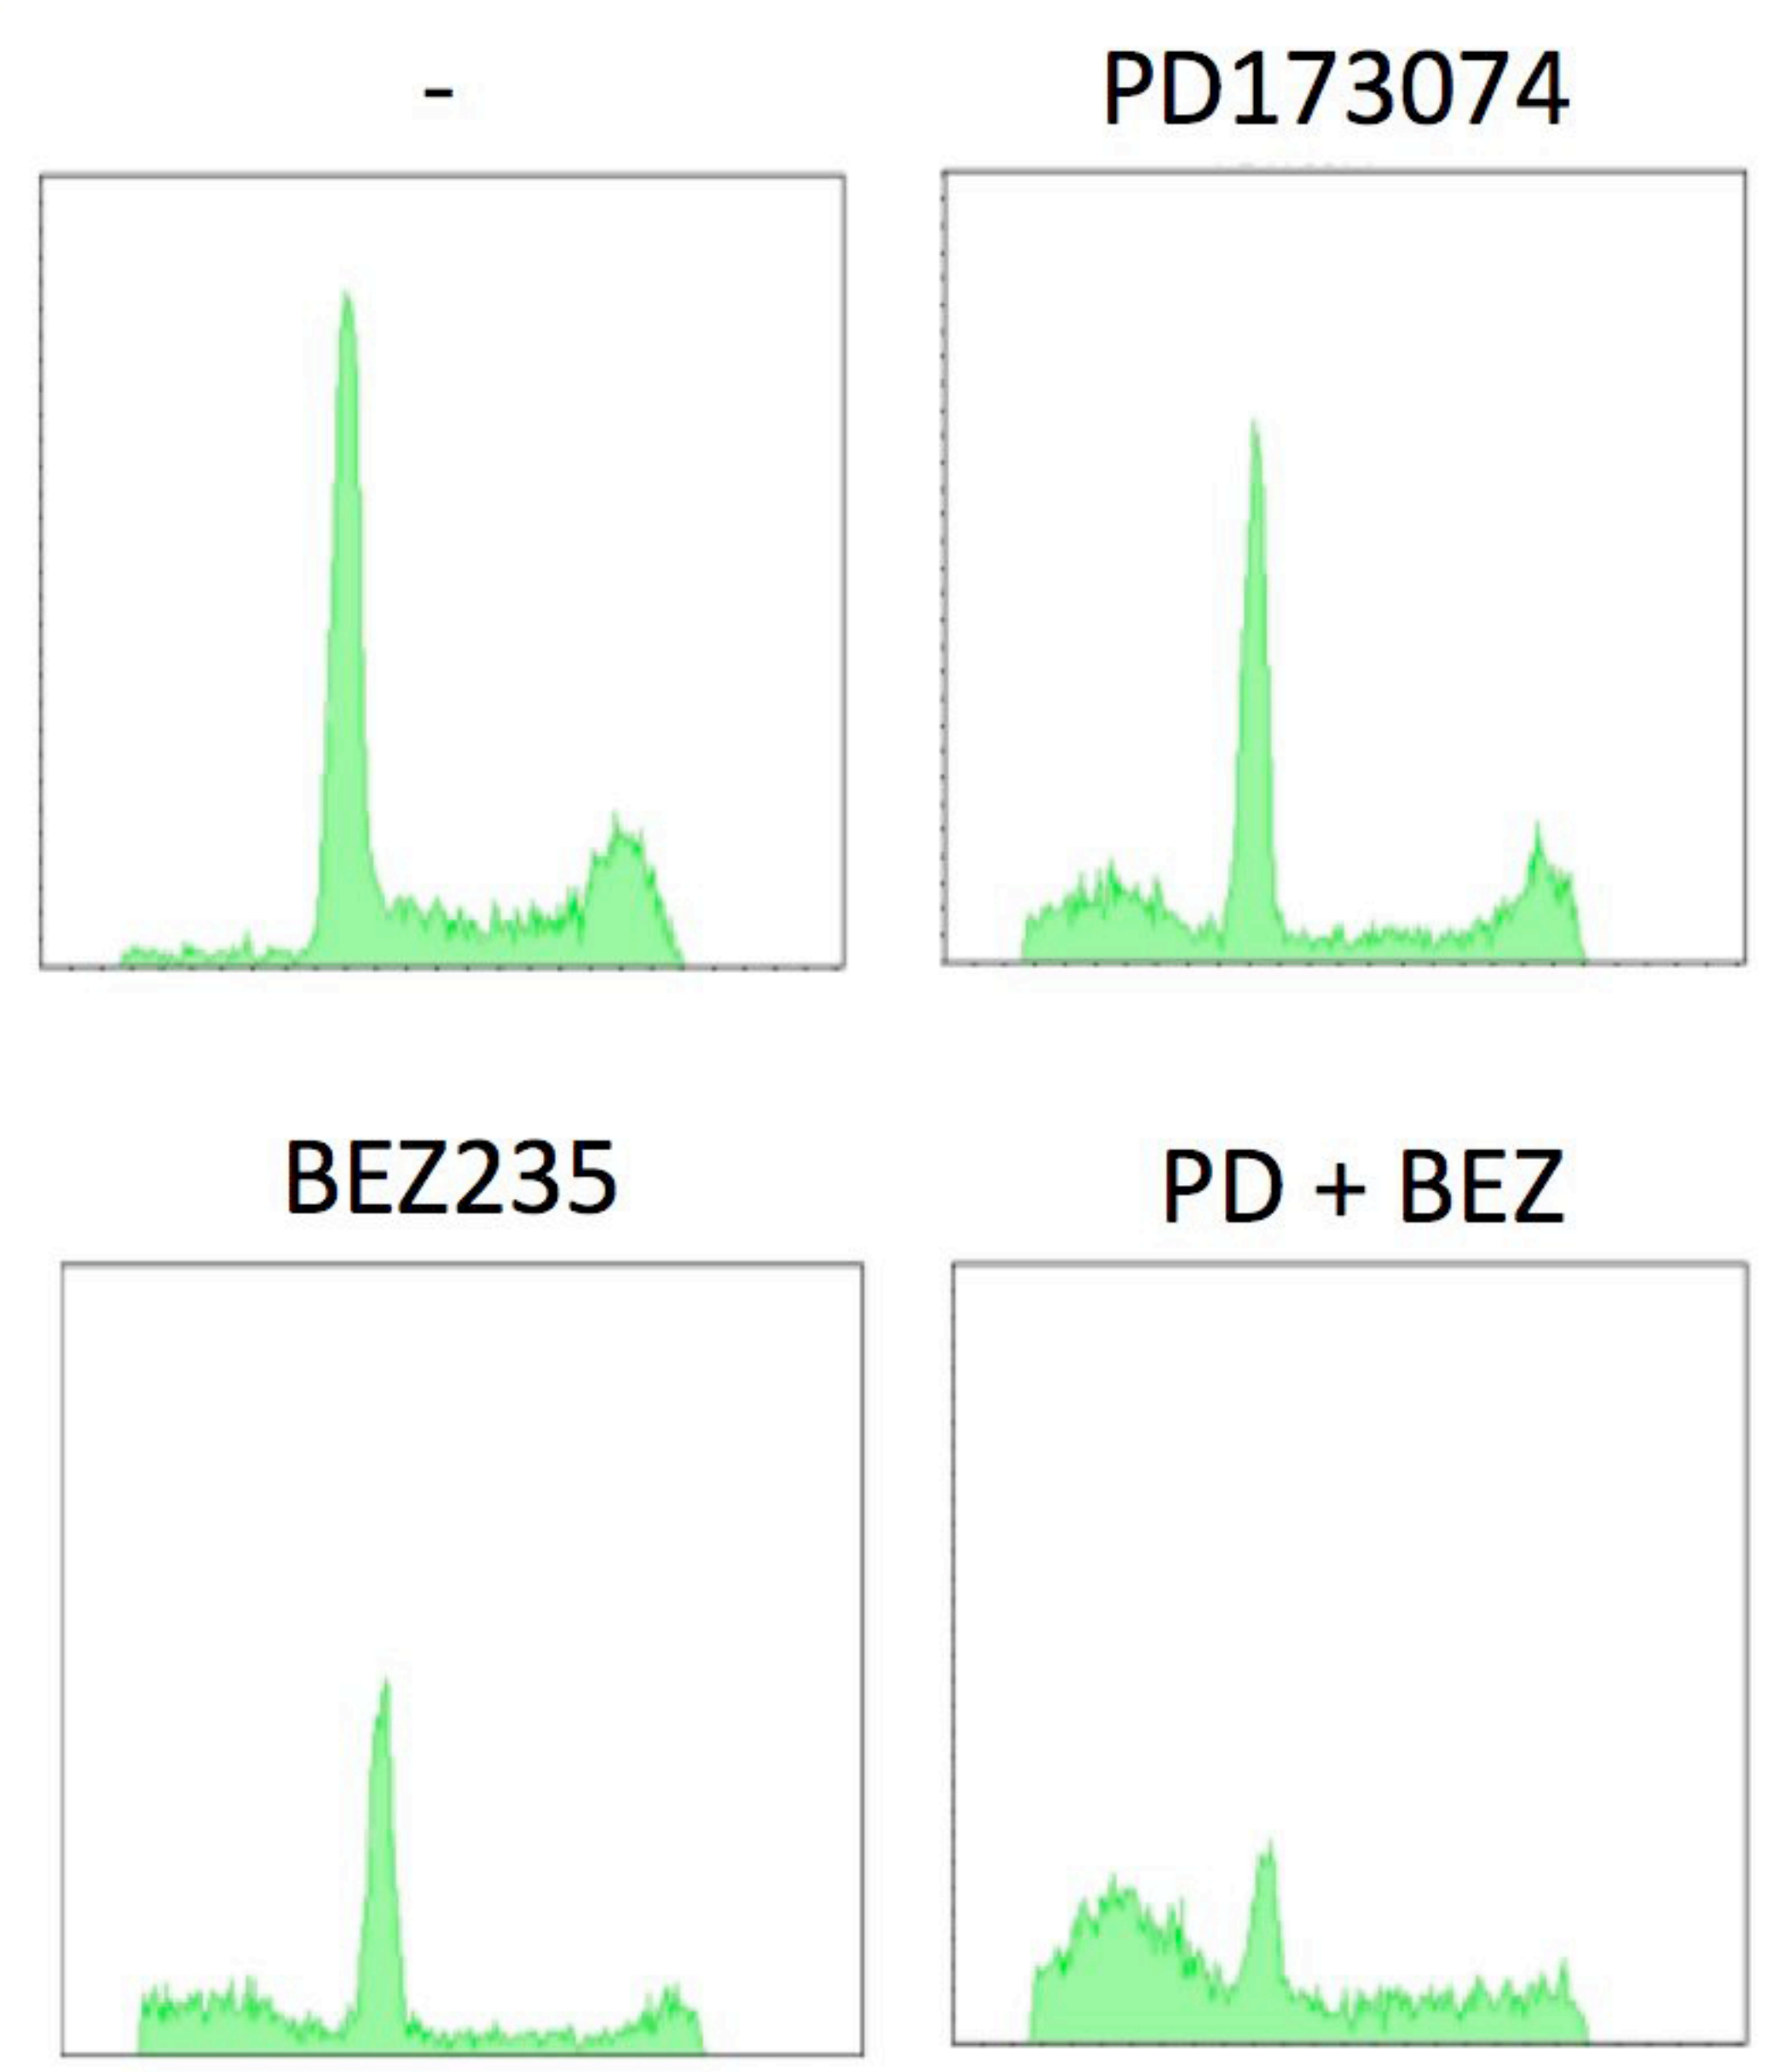

c

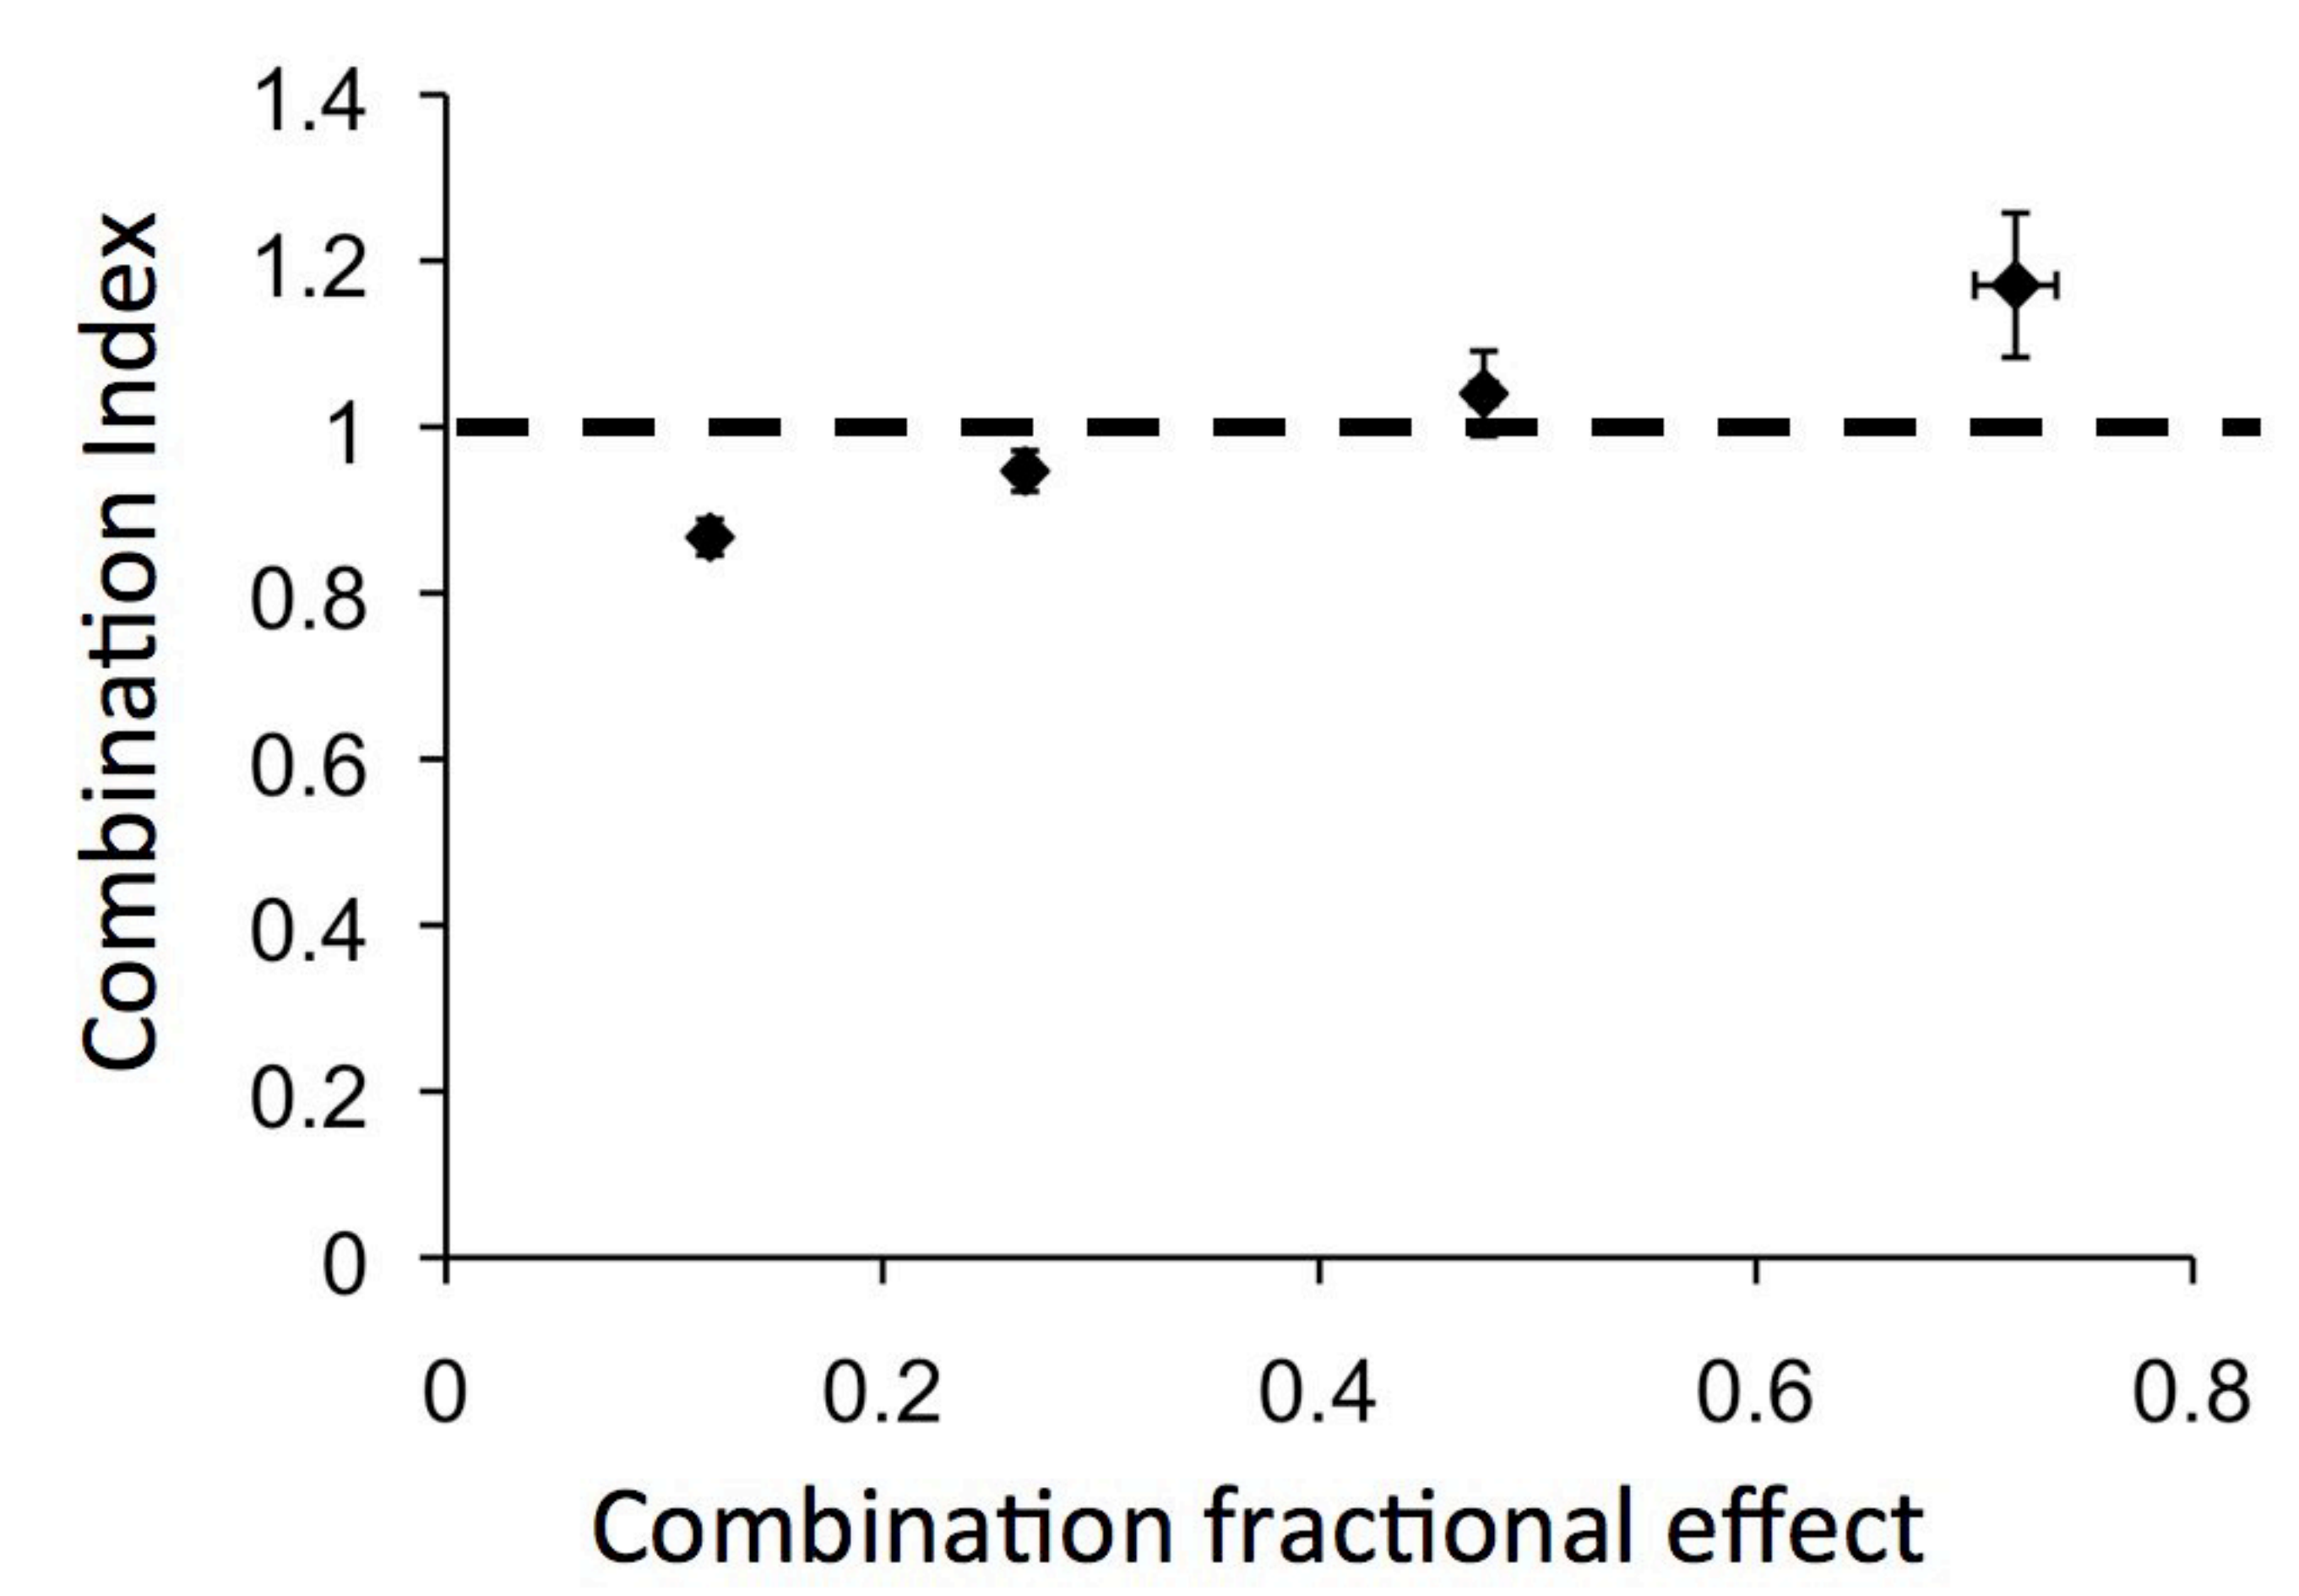

d

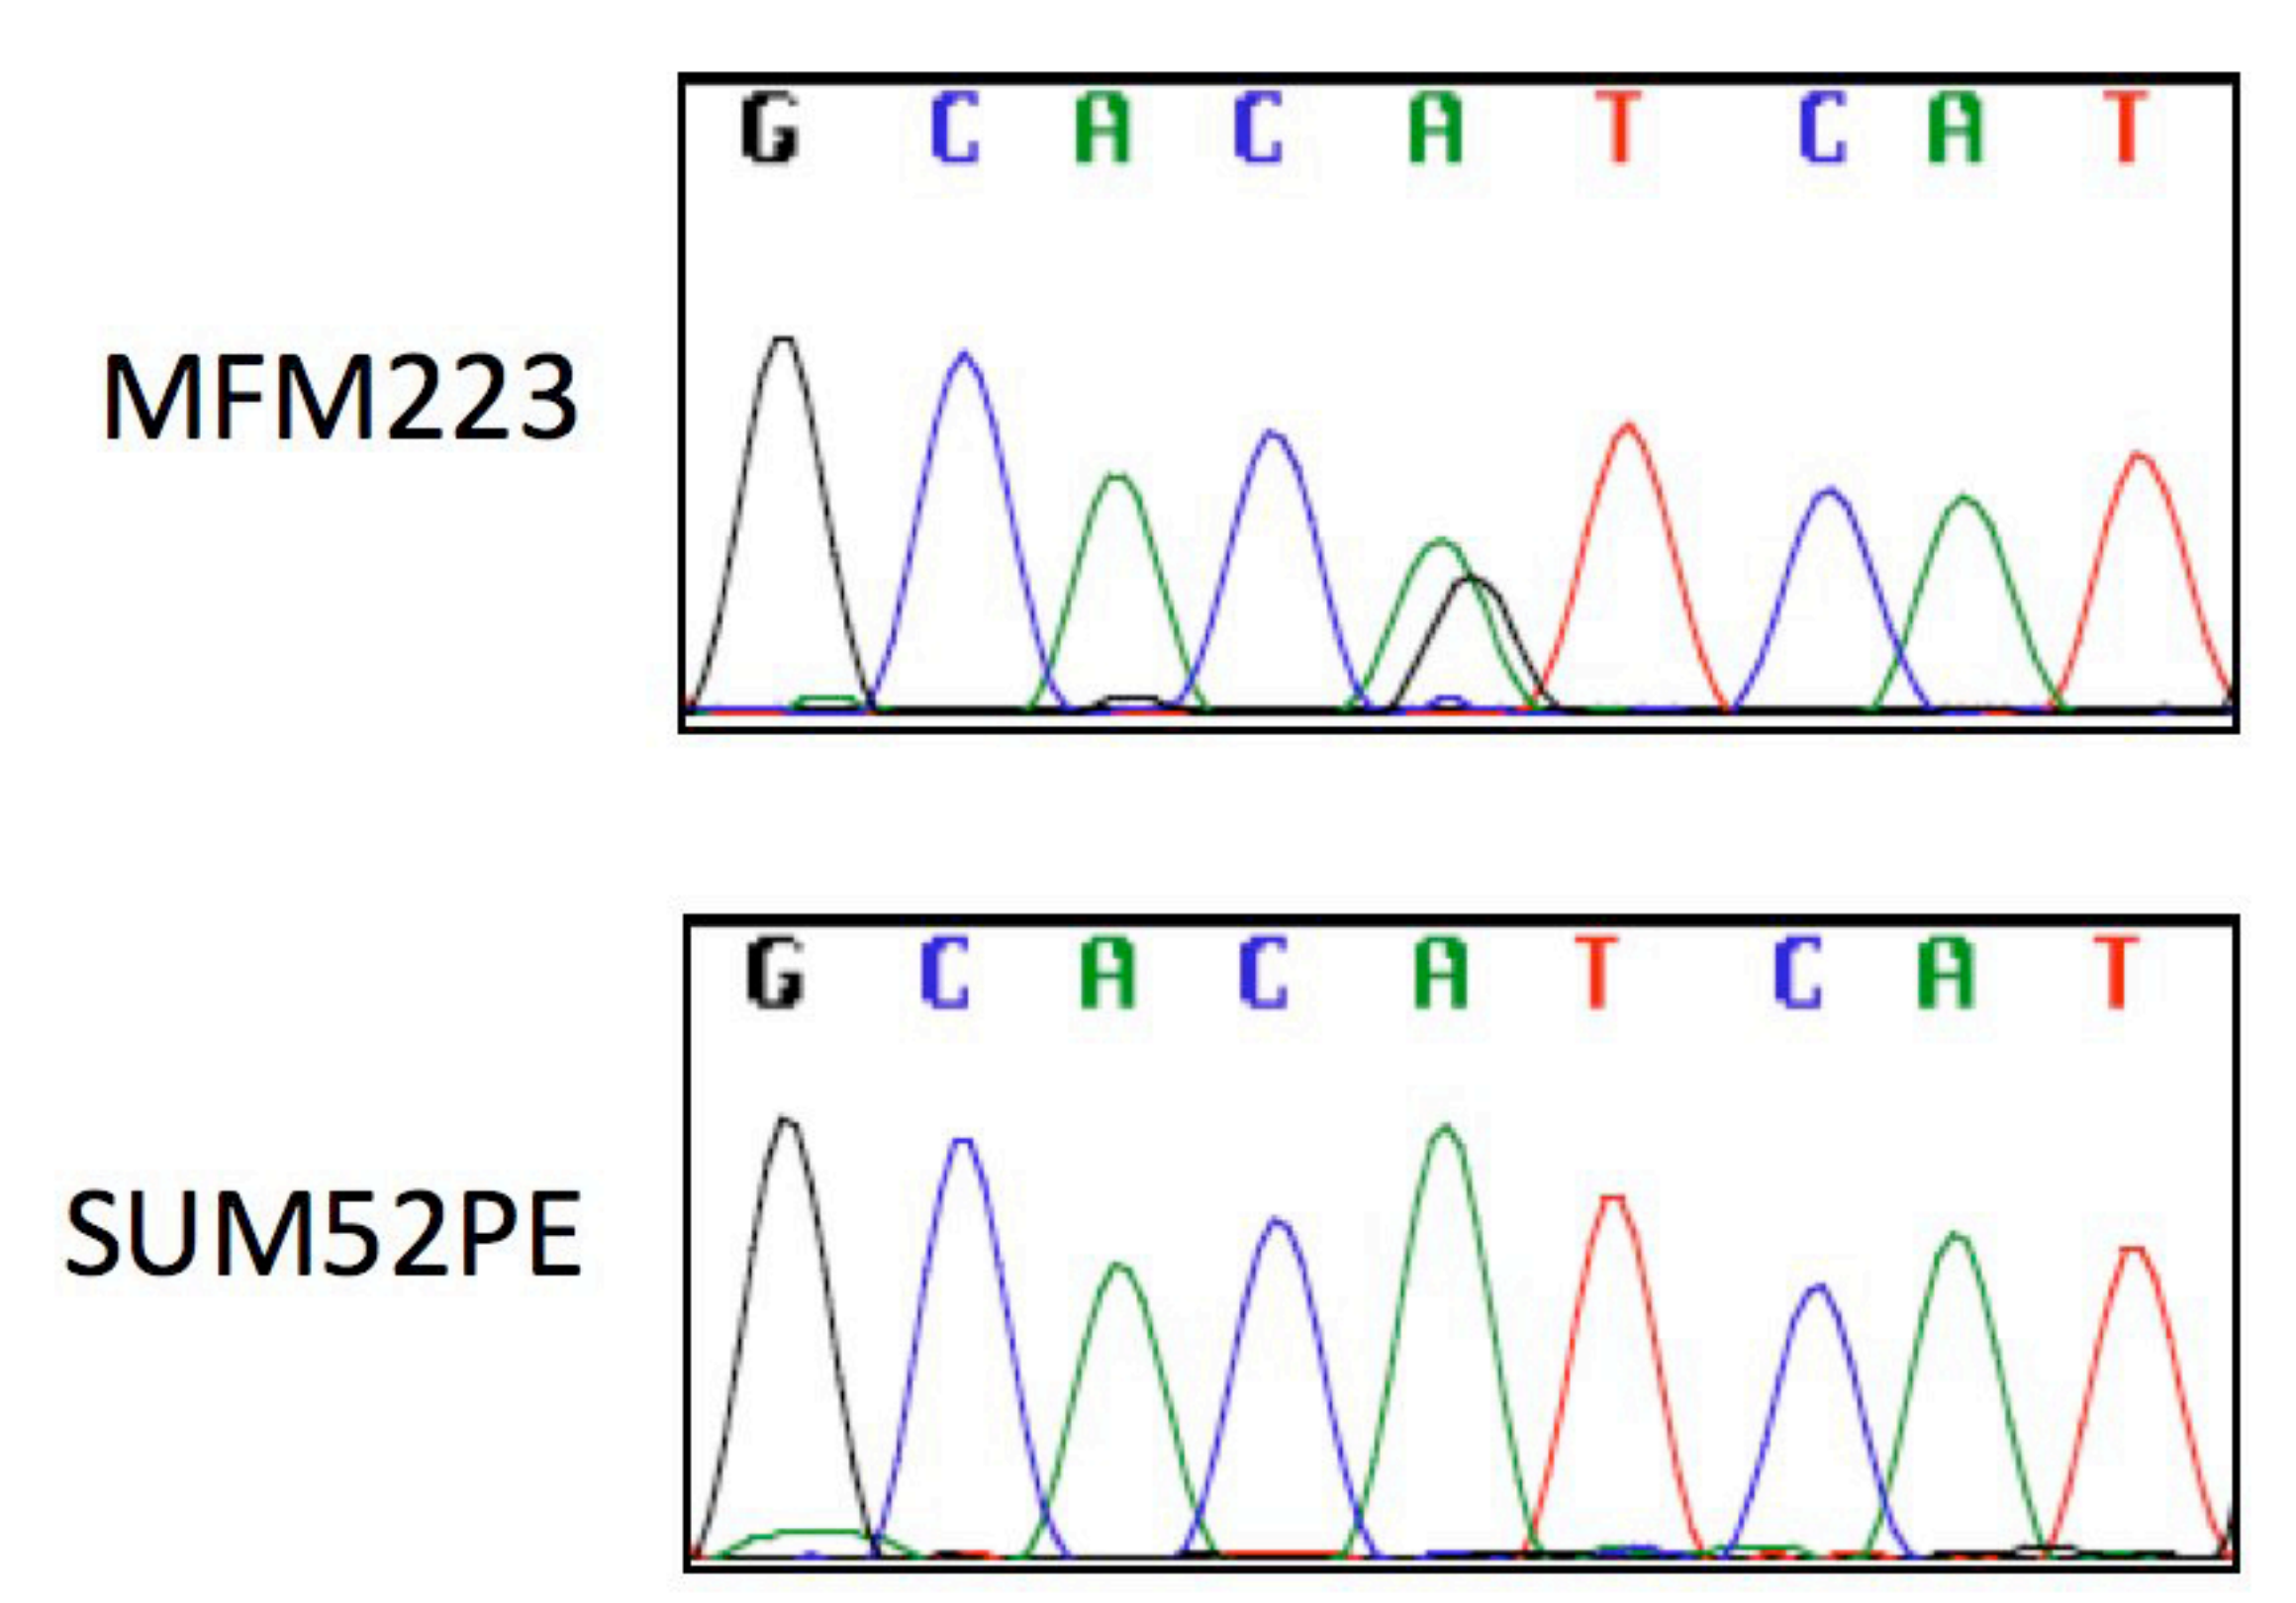

e

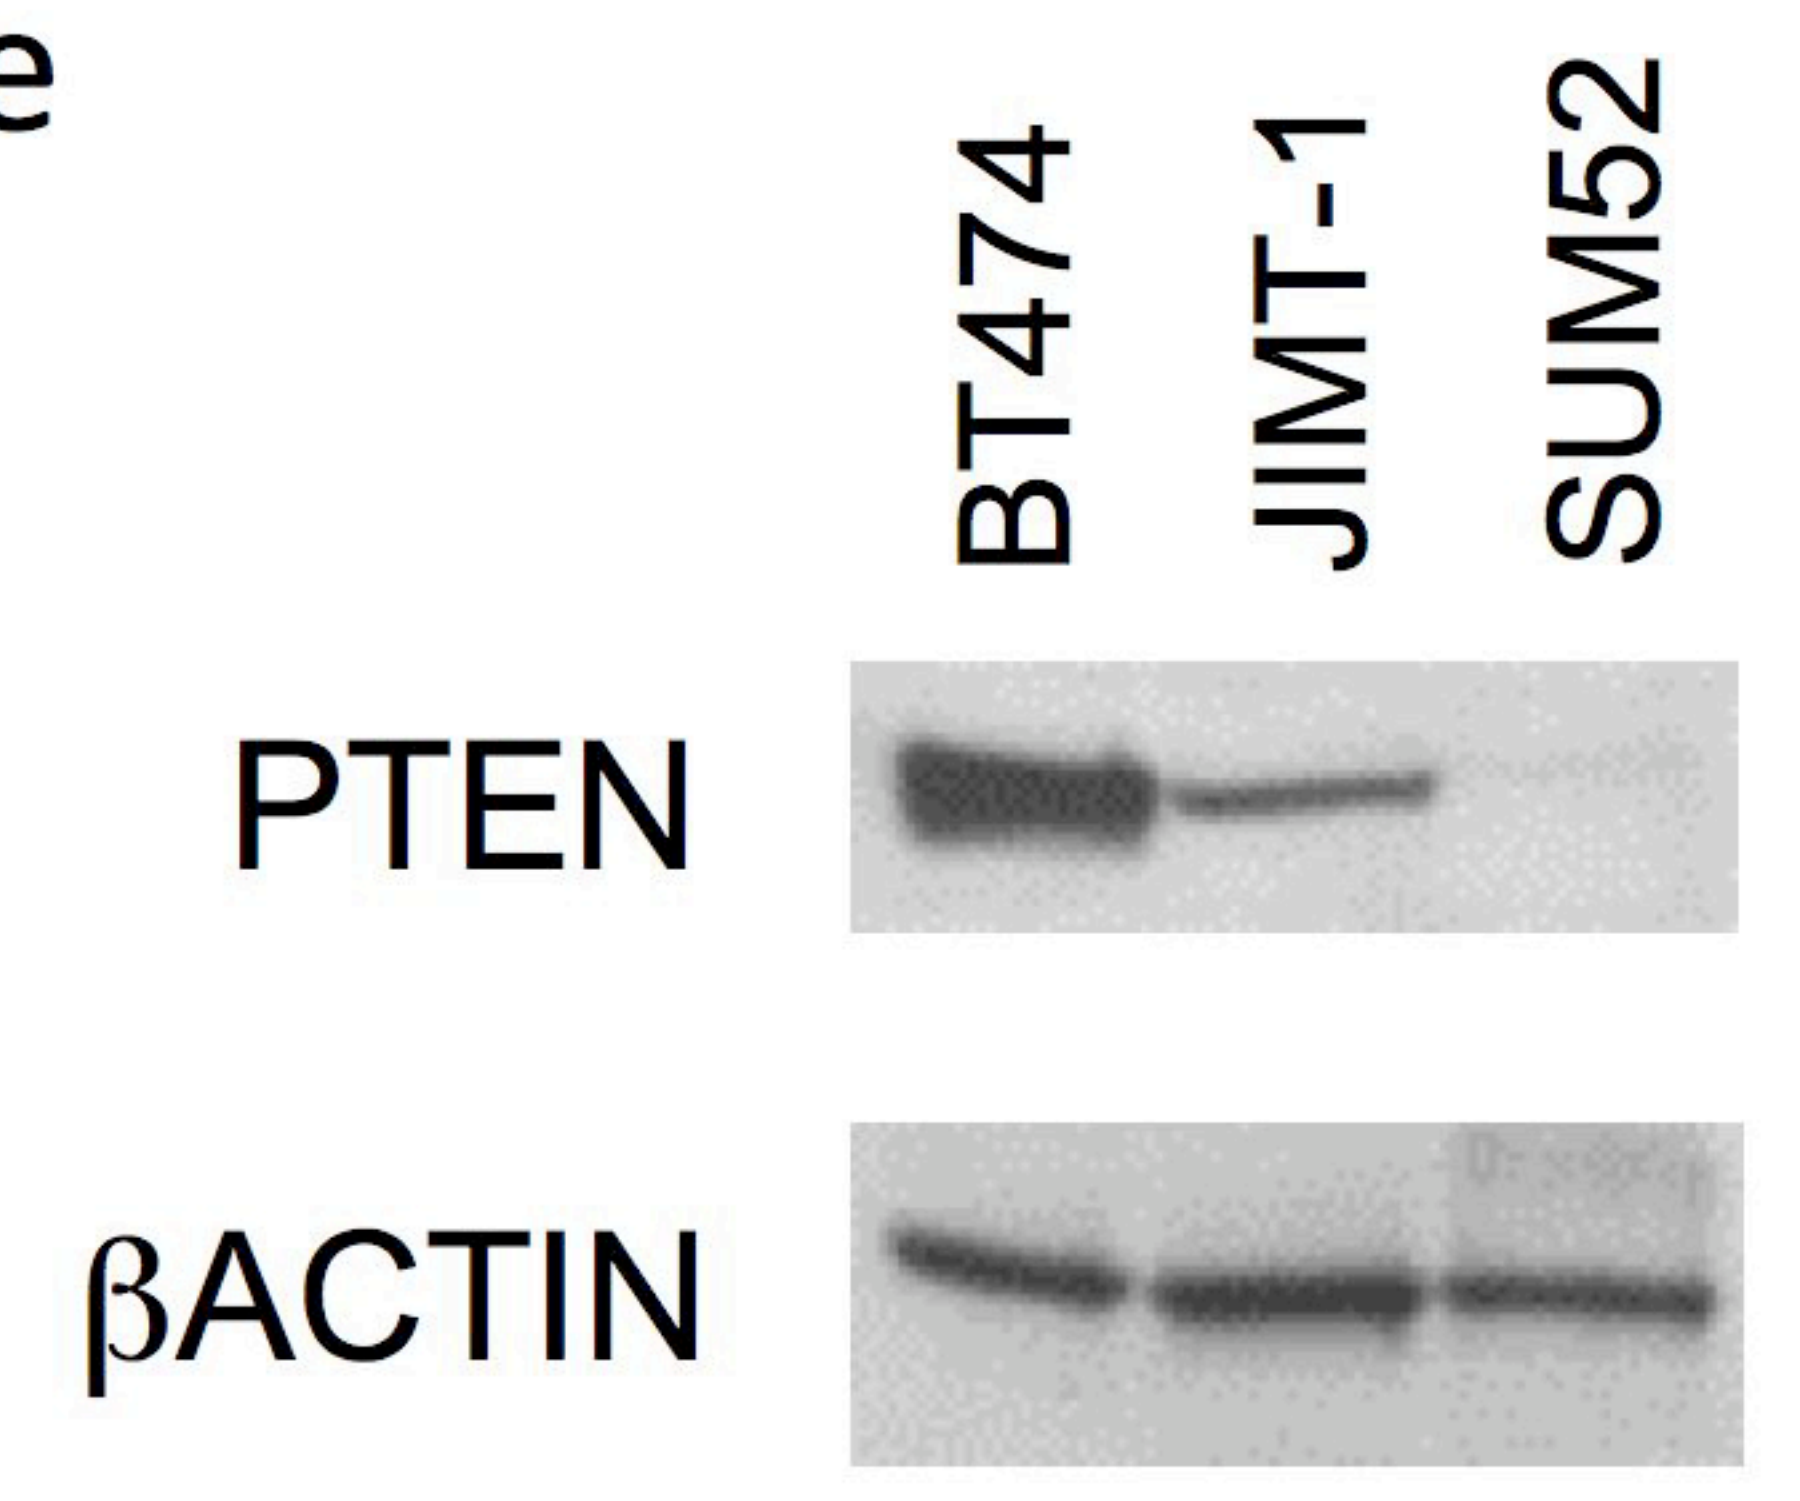

Supplement: NIHMS28236-supplement-12.pdf [file NIHMS28236-supplement-12.pdf]
