# Supplementary material
Source: PubMed Central journal article supplement (PMC2852518)
Supplement: NIHMS28236-supplement-1.pdf [file NIHMS28236-supplement-1.pdf]

**Supplementary Table 1: List of all antibodies, clones, antigen retrieval methods and scoring systems used in the study.**

| Antibody | Species | Clone      | Supplier   | Dilution    | Antigen retrieval method | Threshold                                           |
|----------|---------|------------|------------|-------------|--------------------------|-----------------------------------------------------|
| ER*      | Mouse   | 1D5        | Novocastra | 1:30        | Citrate pH 6, 2' PC      | >1% of neoplastic cells displaying nuclear staining |
| ER**     | Mouse   | 1D5+6F11   | Novocastra | 1:50        | Citrate pH 6, autoclave  |                                                     |
| PR*      | Mouse   | 1A6        | Novocastra | 1:30        | Citrate, 2' PC           |                                                     |
| PR**     | Mouse   | PR-1       | Klinipath  | 1:400       | Citrate pH 6, autoclave  |                                                     |
| HER2*    |         | Herceptest | DAKO       | Pre-diluted | Citrate, 40' WB          | 0 or 1+ - Negative; 2+ - equivocal; 3+ - positive   |
| HER2**   | Mouse   | 3B5        | Neomarkers | 1:80 000    | Citrate pH 6, MW         |                                                     |

MW: microwave; PC: pressure cooker; WB: waterbath

\*: Samples 25-56

\*\* : Samples 1-24
