# Supplementary material
Source: PubMed Central journal article supplement (PMC2852518)
Supplement: NIHMS28236-supplement-2.pdf [file NIHMS28236-supplement-2.pdf]

Supplementary Table 2: Clinicopathological data of 56 triple negative breast cancers.

| Number | Sample    | ER       | HER 2    | PR       | Grade | Age | Size | Node     | Hick's patterns | Nielsen groups* | Basal-like subtype** |
|--------|-----------|----------|----------|----------|-------|-----|------|----------|-----------------|-----------------|----------------------|
| 1      | TN.10030  | Negative | Negative | Negative | III   | 51  | 23   | Negative | Sawtooth        | Basal-like      | Basal-like           |
| 2      | TN.10137  | Negative | Negative | Negative | III   | 78  | 16   | Negative | Simplex         | Basal-like      | Basal-like           |
| 4      | TN.10499  | Negative | Negative | Negative | III   | 46  | 16   | Positive | Simplex         | Basal-like      | Basal-like           |
| 5      | TN.10646  | Negative | Negative | Negative | III   | 42  | 26   | Positive | Sawtooth        | Basal-like      | Basal-like           |
| 6      | TN.10662  | Negative | Negative | Negative | III   | 46  | 13   | Positive | Simplex         | Basal-like      | Basal-like           |
| 7      | TN.10665  | Negative | Negative | Negative | III   | 30  | 25   | Positive | Sawtooth        | Basal-like      | Basal-like           |
| 9      | TN.11093  | Negative | Negative | Negative | III   | 55  | 16   | Negative | Sawtooth        | Basal-like      | Basal-like           |
| 10     | TN.11155  | Negative | Negative | Negative | III   | 54  | 30   | Negative | Simplex         | Basal-like      | Basal-like           |
| 11     | TN.12303  | Negative | Negative | Negative | III   | 36  | 24   | Negative | Amplifier       | Basal-like      | Basal-like           |
| 12     | TN.12523  | Negative | Negative | Negative | III   | 79  | 25   | Negative | Amplifier       | Basal-like      | Basal-like           |
| 13     | TN.1267   | Negative | Negative | Negative | III   | 50  | 30   | Negative | Sawtooth        | Basal-like      | Basal-like           |
| 14     | TN.1878   | Negative | Negative | Negative | III   | 30  | 32   | Negative | Sawtooth        | Basal-like      | Basal-like           |
| 15     | TN.3319   | Negative | Negative | Negative | III   | 45  | 20   | Positive | Amplifier       | Basal-like      | Basal-like           |
| 17     | TN.4171   | Negative | Negative | Negative | III   | 48  | 28   | Negative | Simplex         | Basal-like      | Basal-like           |
| 18     | TN.4274   | Negative | Negative | Negative | III   | 29  | 25   | Negative | Sawtooth        | Basal-like      | Basal-like           |
| 19     | TN.4643   | Negative | Negative | Negative | III   | 47  | 22   | Negative | Amplifier       | Basal-like      | Basal-like           |
| 20     | TN.5508   | Negative | Negative | Negative | III   | 40  | 28   | Negative | Sawtooth        | Basal-like      | Basal-like           |
| 21     | TN.7880   | Negative | Negative | Negative | III   | 59  | 35   | Positive | Amplifier       | Basal-like      | Basal-like           |
| 22     | TN.9138   | Negative | Negative | Negative | III   | 71  | 70   | Negative | Simplex         | Basal-like      | Basal-like           |
| 23     | TN.9776   | Negative | Negative | Negative | III   | 45  | 28   | Negative | Amplifier       | Basal-like      | Basal-like           |
| 25     | TN.B17    | Negative | Negative | Negative | III   | 53  | 23   | Negative | Sawtooth        | Basal-like      | Basal-like           |
| 27     | TN.B2     | Negative | Negative | Negative | III   | 48  | 25   | Positive | Sawtooth        | Basal-like      | Basal-like           |
| 28     | TN.B41    | Negative | Negative | Negative | III   | 70  | 17   | Negative | Sawtooth        | Basal-like      | Basal-like           |
| 31     | TN.B6     | Negative | Negative | Negative | III   | 69  | 35   | Negative | Sawtooth        | Basal-like      | Basal-like           |
| 32     | TN.B62    | Negative | Negative | Negative | III   | 50  | 35   | Positive | Simplex         | Basal-like      | Basal-like           |
| 33     | TN.B64    | Negative | Negative | Negative | III   | 53  | 21   | Negative | Sawtooth        | Basal-like      | Basal-like           |
| 37     | TN.B78    | Negative | Negative | Negative | III   | 35  | 22   | Negative | Sawtooth        | Basal-like      | Basal-like           |
| 38     | TN.B79    | Negative | Negative | Negative | III   | 50  | 24   | Positive | Sawtooth        | Basal-like      | Basal-like           |
| 39     | TN.B81    | Negative | Negative | Negative | III   | 30  | 20   | Negative | Sawtooth        | Basal-like      | Basal-like           |
| 41     | TN.B87    | Negative | Negative | Negative | III   | 61  | 27   | Positive | Simplex         | Basal-like      | Basal-like           |
| 8      | TN.10752  | Negative | Negative | Negative | III   | 42  | 22   | Negative | Amplifier       | Unclassifiable  | Basal-like           |
| 16     | TN.3701   | Negative | Negative | Negative | III   | 49  | 40   | Positive | Simplex         | Unclassifiable  | Basal-like           |
| 24     | TN.9961   | Negative | Negative | Negative | III   | 44  | 19   | Positive | Sawtooth        | Unclassifiable  | Basal-like           |
| 26     | TN.B18    | Negative | Negative | Negative | III   | 38  | 37   | Negative | Sawtooth        | Basal-like      | NA                   |
| 30     | TN.B53    | Negative | Negative | Negative | III   | 45  | 35   | Positive | Simplex         | Basal-like      | NA                   |
| 42     | TN.BC184  | Negative | Negative | Negative | III   | 89  | NA   | NA       | Amplifier       | Basal-like      | NA                   |
| 44     | TN.BC2697 | Negative | Negative | Negative | III   | 62  | NA   | NA       | Sawtooth        | Basal-like      | NA                   |
| 45     | TN.BC2968 | Negative | Negative | Negative | III   | 39  | NA   | NA       | Sawtooth        | Basal-like      | NA                   |
| 47     | TN.BC3044 | Negative | Negative | Negative | III   | 41  | NA   | NA       | Sawtooth        | Basal-like      | NA                   |
| 48     | TN.BC3045 | Negative | Negative | Negative | II    | 56  | NA   | NA       | Sawtooth        | Basal-like      | NA                   |
| 49     | TN.BC3047 | Negative | Negative | Negative | II    | NA  | NA   | NA       | Amplifier       | Basal-like      | NA                   |
| 50     | TN.NT0001 | Negative | Negative | Negative | III   | NA  | 8    | NA       | Sawtooth        | Basal-like      | NA                   |
| 51     | TN.NT0015 | Negative | Negative | Negative | III   | NA  | 4    | Positive | Sawtooth        | Basal-like      | NA                   |
| 52     | TN.NT0024 | Negative | Negative | Negative | III   | NA  | 3    | Negative | Sawtooth        | Basal-like      | NA                   |
| 53     | TN.NT0039 | Negative | Negative | Negative | III   | NA  | 3.5  | NA       | Sawtooth        | Basal-like      | NA                   |
| 54     | TN.NT004  | Negative | Negative | Negative | III   | NA  | 6    | NA       | Amplifier       | Basal-like      | NA                   |
| 55     | TN.NT005  | Negative | Negative | Negative | III   | NA  | 2    | Negative | Amplifier       | Basal-like      | NA                   |
| 56     | TN.NT0067 | Negative | Negative | Negative | III   | NA  | 4.5  | Positive | Amplifier       | Basal-like      | NA                   |
| 46     | TN.BC3041 | Negative | Negative | Negative | III   | 51  | NA   | NA       | Simplex         | NA              | NA                   |
| 34     | TN.B65    | Negative | Negative | Negative | III   | 46  | 12   | Negative | Sawtooth        | Unclassifiable  | NA                   |
| 35     | TN.B69    | Negative | Negative | Negative | III   | 59  | 22   | Negative | Simplex         | Unclassifiable  | NA                   |
| 36     | TN.B73    | Negative | Negative | Negative | III   | 59  | 25   | Positive | Sawtooth        | Unclassifiable  | NA                   |
| 40     | TN.B86    | Negative | Negative | Negative | III   | 38  | 14   | Negative | Simplex         | Unclassifiable  | NA                   |
| 43     | TN.BC2527 | Negative | Negative | Negative | III   | 33  | NA   | NA       | Simplex         | Unclassifiable  | NA                   |
| 3      | TN.10391  | Negative | Negative | Negative | III   | 67  | 30   | Positive | Simplex         | Basal-like      | Unclassifiable       |
| 29     | TN.B45    | Negative | Negative | Negative | III   | 52  | 38   | Positive | Amplifier       | Basal-like      | Unclassifiable       |

ER: oestrogen receptor; NA: not available; PR: progesterone receptor

\*: Nielsen groups: molecular subtypes defined by the immunohistochemical surrogate described by Nielsen et al. (2004)

\*\* : Molecular subgroups defined by microarray-based expression profiling analysis as described by Kreike et al. (2007) and Natrajan et al. (2009b)
