# Supplementary material
Source: PubMed Central journal article supplement (PMC2852518)
Supplement: NIHMS28236-supplement-3.pdf [file NIHMS28236-supplement-3.pdf]

Supplementary Table 3: Comparison between the histopathological, immunohistochemical and molecular subtype of the 24 cases included from Kreike et al. (2007) and the 73 cases excluded from the study.

| Parameter                                             |     | Included (n=24) | Excluded (n=73) | P value  |
|-------------------------------------------------------|-----|-----------------|-----------------|----------|
| Age (years)                                           |     | 47.63±2.65      | 50.68±1.63      | >0.1*    |
| Tumour Size (cm)                                      |     | 2.46±0.13       | 2.67±1.70       | >0.1*    |
| Lymph node metastasis                                 |     |                 |                 | >0.1**   |
|                                                       | +   | 9               | 34              |          |
|                                                       | -   | 15              | 39              |          |
| Histological grade                                    |     |                 |                 | >0.1***  |
|                                                       | 1   | 0               | 2               |          |
|                                                       | 2   | 0               | 9               |          |
|                                                       | 3   | 24              | 60              |          |
| Cytokeratin 5/6                                       |     |                 |                 | >0.1**   |
|                                                       | +   | 20              | 54              |          |
|                                                       | -   | 3               | 18              |          |
| p53                                                   |     |                 |                 | >0.1**   |
|                                                       | +   | 14              | 34              |          |
|                                                       | -   | 9               | 38              |          |
| c-KIT                                                 |     |                 |                 | >0.05**  |
|                                                       | +   | 13              | 24              |          |
|                                                       | -   | 10              | 48              |          |
| Basal-like*****                                       |     |                 |                 | >0.1**   |
|                                                       | Yes | 23              | 65              |          |
|                                                       | No  | 1               | 9               |          |
| Recurrence-free survival (mean±standard error months) |     | 14.75±0.57      | 14.59±1.33      | >0.1**** |
| Overall survival (mean±standard error months)         |     | 12.06±1.42      | 11.13±1.20      | >0.1**** |

\*: Two-tailed Student's T test; \*\*: two-tailed Fisher's exact test; \*\*\*: Two-tailed  $\chi^2$  test; Kaplan-Meier and Log-Rank Test; \*\*\*\*\*: Basal-like breast cancer assignment as described by Kreike et al. (2007).

Data on age, tumour size, lymph node metastasis, histological grade, cytokeratin 5/6, p53 and c-KIT were retrieved from Kreike et al. (2007).
