# Supplementary material
Source: PubMed Central journal article supplement (PMC2852518)
Supplement: NIHMS28236-supplement-4.pdf [file NIHMS28236-supplement-4.pdf]

Supplementary Table 4: Genomic regions recurrently gained or lost in >40% of 56 triple negative breast cancers.

| Gain       |                 |            |          |             |           | Loss       |               |            |          |             |           |
|------------|-----------------|------------|----------|-------------|-----------|------------|---------------|------------|----------|-------------|-----------|
| Chromosome | Cytoband        | Start (Mb) | End (Mb) | Length (Mb) | Frequency | Chromosome | Cytoband      | Start (Mb) | End (Mb) | Length (Mb) | Frequency |
| 1          | 1p12-p11.2      | 118.32     | 121.35   | 3.03        | 68%       | 1          | p36.32-p34.3  | 2.32       | 35.38    | 33.06       | 68%       |
| 1          | 1q21.1-q44      | 143.51     | 248.88   | 105.37      | 80%       | 1          | q12-q21.1     | 142.54     | 143.54   | 1.00        | 50%       |
| 2          | 2p16.3-p16.1    | 49.91      | 60.48    | 10.57       | 43%       | 2          | q14.2         | 121.05     | 122.1    | 1.05        | 41%       |
| 2          | 2p11.2-p11.1    | 90.23      | 91.94    | 1.71        | 48%       | 2          | q35           | 218.49     | 220.46   | 1.97        | 48%       |
| 3          | 3q22.1-q22.2    | 133.46     | 134.97   | 1.51        | 46%       | 2          | q36.3-q37.1   | 230.68     | 232.52   | 1.84        | 46%       |
| 3          | 3q23            | 138.82     | 141.47   | 2.65        | 46%       | 2          | q37.1-q37.3   | 232.49     | 241.59   | 9.10        | 61%       |
| 3          | 3q23-q26.33     | 141.57     | 182.2    | 40.63       | 61%       | 3          | p22.1         | 42.04      | 42.56    | 0.52        | 41%       |
| 3          | 3q27.1-q27.2    | 184.42     | 184.8    | 0.38        | 41%       | 3          | p22.1-p13     | 42.72      | 73.1     | 30.38       | 63%       |
| 3          | 3q27.3-q29      | 187.06     | 194.03   | 6.97        | 46%       | 4          | p16.3         | 0.83       | 1.42     | 0.59        | 43%       |
| 5          | 5p15.33         | 1.51       | 1.85     | 0.34        | 41%       | 4          | p16.3         | 1.81       | 2.75     | 0.94        | 41%       |
| 5          | 5p15.2          | 11.83      | 12.31    | 0.48        | 41%       | 4          | p16.3-p15.1   | 3.4        | 34.05    | 30.65       | 73%       |
| 5          | 5p15.2          | 13.54      | 13.95    | 0.41        | 43%       | 4          | p15.1         | 34.16      | 35.47    | 1.31        | 43%       |
| 5          | 5p14.3          | 19.03      | 19.62    | 0.59        | 41%       | 4          | p15.1-p13     | 35.6       | 42.59    | 6.99        | 54%       |
| 5          | 5p14.3          | 20.08      | 21.1     | 1.02        | 45%       | 4          | p11           | 49.16      | 49.63    | 0.47        | 50%       |
| 5          | 5p14.3-p14.1    | 22.32      | 24.74    | 2.42        | 43%       | 4          | q31.3         | 152.55     | 153.12   | 0.57        | 41%       |
| 5          | 5p14.1          | 24.85      | 26.05    | 1.2         | 43%       | 4          | q34.3-q35.2   | 181.94     | 189.91   | 7.97        | 46%       |
| 5          | 5p14.1-p13.3    | 27.11      | 29.45    | 2.34        | 41%       | 5          | q11.2-q14.3   | 51.89      | 83       | 31.11       | 64%       |
| 5          | 5p13.3          | 30.65      | 31.28    | 0.63        | 41%       | 5          | q14.3         | 85.99      | 90.25    | 4.26        | 41%       |
| 6          | 6p25.3-p25.2    | 0.13       | 3.43     | 3.3         | 48%       | 5          | q14.3-q15     | 92.2       | 94.52    | 2.32        | 41%       |
| 6          | 6p25.1-p24.3    | 6.57       | 7.89     | 1.32        | 43%       | 5          | q15           | 95.18      | 97.39    | 2.21        | 43%       |
| 6          | 6p24.3-p22.2    | 8.09       | 25.73    | 17.64       | 57%       | 5          | q21.3         | 105.92     | 106.9    | 0.98        | 43%       |
| 6          | 6p22.1          | 27.27      | 28.26    | 0.99        | 41%       | 5          | q21.3-q23.1   | 108.98     | 118.79   | 9.81        | 45%       |
| 6          | 6p21.32         | 32.77      | 33.1     | 0.33        | 41%       | 5          | q23.1-q34     | 120.31     | 162.2    | 41.89       | 71%       |
| 6          | 6p21.2-p21.1    | 37.83      | 41.69    | 3.86        | 48%       | 5          | q34           | 162.39     | 164.51   | 2.12        | 43%       |
| 6          | 6p21.1-q11.1    | 42.98      | 63.25    | 20.27       | 57%       | 5          | q34-q35.3     | 164.86     | 177.79   | 12.93       | 66%       |
| 6          | 6q12-q23.1      | 63.88      | 131.11   | 67.23       | 43%       | 6          | q25.3-q26     | 160.89     | 161.21   | 0.32        | 43%       |
| 7          | 7q11.21         | 64.87      | 65.16    | 0.29        | 45%       | 8          | p23.3-p22     | 0.17       | 13.79    | 13.62       | 61%       |
| 7          | 7q21.11-q21.3   | 79.2       | 96.55    | 17.35       | 50%       | 8          | p22-p12       | 16.38      | 31.35    | 14.97       | 68%       |
| 7          | 7q22.3-q31.1    | 107.11     | 108.13   | 1.02        | 41%       | 8          | p12           | 31.35      | 32.39    | 1.04        | 43%       |
| 7          | 7q31.1          | 110.07     | 111.51   | 1.44        | 41%       | 9          | q32           | 116.08     | 117.28   | 1.20        | 43%       |
| 7          | 7q31.1-q32.1    | 111.88     | 127.78   | 15.9        | 52%       | 9          | q32-q33.1     | 117.29     | 118.01   | 0.72        | 43%       |
| 7          | 7q32.3-q33      | 131.57     | 137.75   | 6.18        | 55%       | 9          | q33.2         | 123.05     | 123.52   | 0.47        | 43%       |
| 7          | 7q33-q34        | 137.98     | 138.43   | 0.45        | 41%       | 9          | q33.2         | 124.29     | 125.24   | 0.95        | 41%       |
| 7          | 7q34            | 140.61     | 142.72   | 2.11        | 50%       | 9          | q33.3         | 128.68     | 129.92   | 1.24        | 41%       |
| 7          | 7q35            | 143.68     | 147.7    | 4.02        | 50%       | 9          | q34.11-q34.3  | 131.53     | 140.71   | 9.18        | 55%       |
| 7          | 7q36.1          | 149.11     | 151.65   | 2.54        | 48%       | 10         | q23.32-q24.1  | 93.98      | 97.89    | 3.91        | 43%       |
| 7          | 7q36.2-q36.3    | 153.35     | 159.12   | 5.77        | 63%       | 10         | q24.1-q24.2   | 98.18      | 99.84    | 1.66        | 41%       |
| 8          | 8q11.1-q24.3    | 46.85      | 146.24   | 99.39       | 89%       | 10         | q24.2         | 99.93      | 100.34   | 0.41        | 41%       |
| 9          | 9p24.3-p24.1    | 0.03       | 5.47     | 5.44        | 54%       | 10         | q24.2-q25.1   | 100.75     | 107.09   | 6.34        | 54%       |
| 9          | 9p22.3          | 14.6       | 14.85    | 0.25        | 41%       | 10         | q25.2-q25.3   | 114.33     | 116.29   | 1.96        | 43%       |
| 9          | 9p12            | 42.06      | 42.27    | 0.21        | 45%       | 10         | q25.3-q26.11  | 118.6      | 120.82   | 2.22        | 43%       |
| 10         | 10p15.3-p11.21  | 0.06       | 36.6     | 36.54       | 70%       | 10         | q26.12        | 121.78     | 122.11   | 0.33        | 41%       |
| 12         | 12p13.33-p13.31 | 0.15       | 7.02     | 6.87        | 57%       | 10         | q26.12-q26.13 | 122.31     | 126.02   | 3.71        | 43%       |
| 12         | 12p13.31-p11.2  | 8.73       | 28.21    | 19.48       | 43%       | 10         | q26.13-q26.3  | 126.58     | 133.87   | 7.29        | 46%       |
| 13         | 13q33.2-q34     | 106.88     | 110.39   | 3.51        | 46%       | 10         | q26.3         | 133.92     | 134.43   | 0.51        | 45%       |
| 15         | 15q26.3         | 100.63     | 101.57   | 0.94        | 41%       | 11         | p15.5-p15.4   | 1.39       | 3.5      | 2.11        | 46%       |
| 17         | 17q24.3         | 68.04      | 70.03    | 1.99        | 43%       | 11         | p15.4         | 6.29       | 6.62     | 0.33        | 41%       |
| 19         | 19q11           | 27.73      | 28.46    | 0.73        | 50%       | 11         | p15.4         | 7.98       | 9.08     | 1.10        | 46%       |
| 19         | 19q12           | 30.35      | 30.73    | 0.38        | 41%       | 11         | p15.4         | 9.28       | 10.04    | 0.76        | 43%       |
| 20         | 20q13.33        | 62.79      | 62.96    | 0.17        | 46%       | 11         | q23.3         | 116.13     | 116.64   | 0.51        | 43%       |
|            |                 |            |          |             |           | 11         | q23.3         | 116.93     | 118.08   | 1.15        | 43%       |
|            |                 |            |          |             |           | 11         | q23.3         | 119.25     | 120.17   | 0.92        | 46%       |
|            |                 |            |          |             |           | 11         | q25           | 131.25     | 133.81   | 2.56        | 45%       |
|            |                 |            |          |             |           | 11         | q25           | 134.46     | 134.93   | 0.47        | 43%       |
|            |                 |            |          |             |           | 12         | q13.12-q13.2  | 51.33      | 55.18    | 3.85        | 57%       |
|            |                 |            |          |             |           | 12         | q13.2-q14.1   | 55.94      | 58.23    | 2.29        | 45%       |
|            |                 |            |          |             |           | 12         | q23.3-q24.31  | 107.44     | 123.09   | 15.65       | 54%       |
|            |                 |            |          |             |           | 12         | q24.31-q24.33 | 123.38     | 131.95   | 8.57        | 52%       |
|            |                 |            |          |             |           | 14         | q23.3         | 65.11      | 65.89    | 0.78        | 43%       |
|            |                 |            |          |             |           | 14         | q24.1-q31.1   | 68.55      | 80.06    | 11.51       | 57%       |
|            |                 |            |          |             |           | 14         | q31.3-q32.33  | 89.54      | 107.25   | 17.71       | 57%       |
|            |                 |            |          |             |           | 15         | q11.2-q21.1   | 22.65      | 49.2     | 26.55       | 61%       |
|            |                 |            |          |             |           | 15         | q21.2-q21.3   | 50.55      | 53.12    | 2.57        | 43%       |
|            |                 |            |          |             |           | 15         | q21.3         | 53.4       | 54.61    | 1.21        | 41%       |
|            |                 |            |          |             |           | 15         | q21.3         | 55.64      | 56.23    | 0.59        | 41%       |
|            |                 |            |          |             |           | 15         | q22.1-q22.2   | 59.28      | 60.81    | 1.53        | 41%       |
|            |                 |            |          |             |           | 15         | q22.2         | 61.25      | 61.94    | 0.69        | 41%       |
|            |                 |            |          |             |           | 15         | q22.2         | 62.62      | 63.07    | 0.45        | 41%       |
|            |                 |            |          |             |           | 15         | q22.31        | 64.36      | 64.98    | 0.62        | 43%       |
|            |                 |            |          |             |           | 16         | q12.1-q21     | 48.9       | 58.57    | 9.67        | 57%       |
|            |                 |            |          |             |           | 16         | q21-q22.2     | 65.24      | 70.81    | 5.57        | 55%       |
|            |                 |            |          |             |           | 16         | q22.2-q23.1   | 72.62      | 74.16    | 1.54        | 46%       |
|            |                 |            |          |             |           | 16         | q23.1         | 74.22      | 74.78    | 0.56        | 43%       |
|            |                 |            |          |             |           | 16         | q23.1-q24.3   | 77.48      | 89.01    | 11.53       | 59%       |
|            |                 |            |          |             |           | 17         | p13.3-q11.1   | 0          | 25.46    | 25.46       | 71%       |
|            |                 |            |          |             |           | 17         | q11.1-q11.2   | 25.57      | 27.43    | 1.86        | 46%       |
|            |                 |            |          |             |           | 17         | q11.2-q21.32  | 30.97      | 45.52    | 14.55       | 59%       |
|            |                 |            |          |             |           | 17         | q21.32-q21.33 | 46.53      | 49.2     | 2.67        | 46%       |
|            |                 |            |          |             |           | 18         | q12.3-q21.2   | 42.11      | 49.24    | 7.13        | 48%       |
|            |                 |            |          |             |           | 18         | q21.2-q21.32  | 51.51      | 56.9     | 5.39        | 46%       |
|            |                 |            |          |             |           | 18         | q22.3-q23     | 71.42      | 76.81    | 5.39        | 50%       |
|            |                 |            |          |             |           | 19         | p13.3         | 2.52       | 5.18     | 2.66        | 41%       |
|            |                 |            |          |             |           | 19         | p13.2         | 8.66       | 9.24     | 0.58        | 59%       |
|            |                 |            |          |             |           | 19         | q13.2-q13.31  | 42.84      | 43.93    | 1.09        | 41%       |
|            |                 |            |          |             |           | 19         | q13.32-q13.33 | 45.96      | 49.8     | 3.84        | 46%       |
|            |                 |            |          |             |           | 22         | q11.21-q11.23 | 20.81      | 25.86    | 5.05        | 46%       |
|            |                 |            |          |             |           | 22         | q12.1         | 26.11      | 28.28    | 2.17        | 45%       |
|            |                 |            |          |             |           | 22         | q12.3-q13.1   | 36.48      | 39.93    | 3.45        | 46%       |
|            |                 |            |          |             |           | 22         | q13.1         | 40.47      | 40.81    | 0.34        | 41%       |
|            |                 |            |          |             |           | 22         | q13.2-q13.33  | 42.29      | 50.21    | 7.92        | 54%       |
|            |                 |            |          |             |           | 23         | p22.33-p11.21 | 0.53       | 54.88    | 54.35       | 63%       |
|            |                 |            |          |             |           | 23         | q13.1         | 68.06      | 68.9     | 0.84        | 43%       |
|            |                 |            |          |             |           | 23         | q13.1-q13.2   | 70.35      | 71.97    | 1.62        | 45%       |
|            |                 |            |          |             |           | 23         | q21.33-q23    | 96.33      | 110.28   | 13.95       | 43%       |
|            |                 |            |          |             |           | 23         | q25           | 121.25     | 121.68   | 0.43        | 41%       |
|            |                 |            |          |             |           | 23         | q25-q26.1     | 128.53     | 129.58   | 1.05        | 43%       |
|            |                 |            |          |             |           | 23         | q26.2         | 132.34     | 132.77   | 0.43        | 41%       |
|            |                 |            |          |             |           | 23         | q26.3         | 134.64     | 134.98   | 0.34        | 41%       |
|            |                 |            |          |             |           | 23         | q27.2         | 141.63     | 150.14   | 8.51        | 42%       |
|            |                 |            |          |             |           | 23         | q28           | 150.31     | 153.65   | 3.34        | 54%       |
