# Supplementary material
Source: PubMed Central journal article supplement (PMC2852518)
Supplement: NIHMS28236-supplement-5.pdf [file NIHMS28236-supplement-5.pdf]

Supplementary Table 5: Regions of recurrent amplification in 56 triple negative breast cancers.

| Chromosome | Cytobands     | Start (Mb) | End (Mb) | length MB  | Frequency | Cases                                               | Genes                                                                          | mirnas                            | Copy number variations (CGH)                                                                                         |
|------------|---------------|------------|----------|------------|-----------|-----------------------------------------------------|--------------------------------------------------------------------------------|-----------------------------------|----------------------------------------------------------------------------------------------------------------------|
| 1          | p32.2-p31.3   | 58.26      | 61.78    | 3.519815   | 5%        | TN.12523, TN.BC3044, TN.NT005                       | DAB1, OMA1, TACSTD2, MYSM1, JUN, FGGY, HOOK1, CYP2J2, C1orf87, NFIA            |                                   | V_4226_LC0413, Wong et al. (2007), V_4227_LC0416, Wong et al. (2007)                                                 |
| 1          | p31.3         | 64         | 64.86    | 0.856887   | 4%        | TN.BC3044, TN.NT005                                 | EFCAB7, DLEU2L, PGM1, ROR1, UBE2U                                              |                                   |                                                                                                                      |
| 1          | p31.3-p31.2   | 66.64      | 69.36    | 2.720669   | 5%        | TN.B6, TN.BC3044, TN.NT005                          | PDE4B, SGIP1, TC1X1D1, INSL5, WDR78, MIER1, SLC35D1, C1orf141, IL23R,          | hsa-mir-1262                      | V_0009_LC0463, lafrate et al. (2004)                                                                                 |
| 1          | p22.3         | 87.52      | 87.98    | 0.459519   | 4%        | TN.12523, TN.BC2697                                 | TN.12523, TN.BC2697                                                            |                                   |                                                                                                                      |
| 1          | p12           | 119.26     | 119.88   | 0.614307   | 4%        | TN.1878, TN.BC3045                                  | HS2ST1, LMO4                                                                   |                                   |                                                                                                                      |
| 1          | p12-p11.2     | 120.45     | 121.35   | 0.89588    | 13%       | TN.B18, TN.B41, TN.B6, TN.B81, TN.BC3045, TN.NT004, | TBX15, WARS2                                                                   |                                   |                                                                                                                      |
| 1          | q21.1-q31.1   | 143.51     | 189.96   | 46.474323  | 14%       | TN.10030, TN.11093, TN.3319, TN.4274, TN.7880,      | NOTCH2, FAM72B, FRCR1B                                                         |                                   | V_4246_LC0743, Wong et al. (2007)                                                                                    |
| 1          | q21.2-q31.3   | 191.26     | 197.59   | 6.326642   | 5%        | TN.10030, TN.B6, TN.NT0015                          | PP1A4G, FAM72D, SRGAP2P2, PP1A4B, NBPFF9, PDE4DIP, SEC22B, NOTCH2NL,           | hsa-mir-554, hsa-mir-190b, hsa-   | V_0014_LC0941, lafrate et al. (2004), V_0015_LC0954, lafrate et al. (2004), V_0685_LC0752, Sharp et al. (2005),      |
| 1          | q31.3-q32.1   | 197.93     | 200.85   | 2.915265   | 5%        | TN.10030, TN.B6, TN.NT0015                          | RGS18, RGS1, RGS13, RGS2, UCHL5, TROVE2, GLRX2, CDC73, B3GALT2, KCNT2,         | hsa-mir-1278                      | V_0686_LC1055, Sharp et al. (2005), V_0687_LC1055, Sharp et al. (2005), V_2053_LC1052, Locke et al. (2006),          |
| 1          | q32.1         | 204.03     | 204.03   | 0.039461   | 4%        | TN.10030, TN.NT0015                                 | NEK7, ATP6V1G3, PTPRC, NR5A2, C1orf98, ZNF281, KIF14, DDX59, CAMSAP1L1,        | hsa-mir-181b-1, hsa-mir-181a-1    | V_4267_LC1087, Wong et al. (2007)                                                                                    |
| 1          | q32.1-q32.2   | 206.61     | 211.1    | 4.489412   | 7%        | TN.10030, TN.7880, TN.B6, TN.BC3045, TN.NT0015      | ATP2B4, LAX1, ZC3H11A, SNRPE, C1orf157                                         |                                   |                                                                                                                      |
| 1          | q32.3-q41     | 213.38     | 223.71   | 10.327949  | 11%       | TN.10030, TN.B41, TN.B6, TN.BC3045, TN.NT0015,      | SRGAP2, IKBKE, C1orf47, RASSF5, LGTN, DYRK3, MAPKAPK2, IL10, IL19, IL20, IL24, | hsa-mir-29c, hsa-mir-29b-2, hsa-  | V_4270_LC1176, Wong et al. (2007)                                                                                    |
| 1          | q42.12-q42.13 | 226.39     | 227.63   | 1.233736   | 4%        | TN.7880, TN.NT0015                                  | MXL1, LINS, PAPP1, C1orf95, ITPKB, PSEN2, CAB31, CDC42BPA                      |                                   |                                                                                                                      |
| 1          | q42.13-q44    | 228.79     | 246.88   | 20.086973  | 9%        | TN.10030, TN.10137, TN.11155, TN.12303, TN.1878,    | RHOJ, TMEM78, RAB4A, SPHAR, C1orf96, ACTA1, NUP133, ABCB10, TAF5L, URB2,       | hsa-mir-1162, hsa-mir-1537        | V_0016_LC1285, lafrate et al. (2004), V_0017_LC1401, lafrate et al. (2004), V_2056_LC1401, Locke et al. (2006),      |
| 3          | p26.1         | 4.38       | 4.86     | 0.47423    | 4%        | TN.10662, TN.NT0024                                 | SUMF1, ITPR1                                                                   |                                   |                                                                                                                      |
| 3          | q23           | 139.29     | 140.59   | 1.294612   | 4%        | TN.86, TN.B78                                       | MMNAT3, CLS1T2, TRIM42                                                         |                                   |                                                                                                                      |
| 3          | q24-q25.1     | 148.9      | 149.31   | 0.41387    | 5%        | TN.12303, TN.1267, TN.B78                           | CP, TM4SF18, TM4SF1, TM4SF4, WWTR1                                             |                                   |                                                                                                                      |
| 3          | q25.1-q25.2   | 149.65     | 153.02   | 3.365167   | 7%        | TN.B17, TN.B6, TN.B64, TN.B78                       | RNF13, PFN2, TSC2D2, SERP1, EIF2A, C3orf44, SIAH2, C3orf76, CLRN1, MED12L,     |                                   | V_4355_LC3723, Wong et al. (2007), V_4356_LC3737, Wong et al. (2007)                                                 |
| 3          | q25.31-q25.32 | 155.87     | 157.66   | 1.790988   | 4%        | TN.1878, TN.B64                                     | KCNAB1, SSR3, TIPARP, METT5D2, LEKR1, CCN1, VEPH1, PTK3, C3orf55               |                                   | V_4358_LC3775, Wong et al. (2007)                                                                                    |
| 3          | q25.32-q25.33 | 158.38     | 160.28   | 1.882166   | 4%        | TN.1878, TN.B64                                     | GF11, LXN, RARRES1, MFS1, IQCJ, SCHIP1, IL12A, IFT80, SMC4, TRIM59, KPN4A4     | hsa-mir-15b, hsa-mir-16-2         |                                                                                                                      |
| 3          | q26.1-q26.32  | 166.13     | 176.8    | 10.669782  | 5%        | TN.1878, TN.B2, TN.B6, TN.B65                       | ZBBX, SERPINI2, WDR49, PDCD10, SERPINI1, GOLIM4, EVI1, MYNN, LRRC34,           | hsa-mir-551b, hsa-mir-569         | V_0039_LC3834, lafrate et al. (2004), V_4362_LC3840, Wong et al. (2007), V_4363_LC3872, Wong et al. (2007)           |
| 4          | p13.3         | 3.39       | 3.66     | 0.268738   | 4%        | TN.864, TN.B86                                      | RGS12, HGFA, DOK7, LRPAF1                                                      |                                   | V_4371_LC4159, Wong et al. (2007), V_4372_LC4159, Wong et al. (2007)                                                 |
| 4          | p13.3-p15.3   | 1.56       | 16.72    | 15.160152  | 9%        | TN.1878, TN.3701, TN.B65, TN.B78, TN.BC2968,        | MRPL36, NDUFS6, IRX4, IRX2, C5orf38, IRX1, ADAMTS16, MED10, NSUN2, SRD5A1,     | hsa-mir-887                       | V_2082_LC6572, Locke et al. (2006), V_4430_LC6506, Wong et al. (2007)                                                |
| 5          | p14.3         | 20.56      | 21.2     | 0.639397   | 4%        | TN.3701, TN.NT004                                   |                                                                                |                                   | V_0708_LC6659, Sharp et al. (2005), V_4434_LC6659, Wong et al. (2007)                                                |
| 5          | p14.3-p14.1   | 22.32      | 26.56    | 4.237383   | 5%        | TN.10646, TN.B65, TN.NT004                          | CDH12, PRDM9, CDH10                                                            |                                   |                                                                                                                      |
| 5          | p12           | 44.25      | 44.49    | 0.244221   | 4%        | TN.10646, TN.NT004                                  | FGF10                                                                          |                                   |                                                                                                                      |
| 6          | q22.31-q22.33 | 124.14     | 129.07   | 4.928908   | 5%        | TN.12303, TN.3319, TN.BC2968, TN.NT0024             | NKAIN2, RNF217, TPDS2L1, HDDC2, HEY2, NCOA7, HINT3, TRMT11, C6orf173,          | hsa-mir-588                       | V_0090_LC8741, lafrate et al. (2004), V_0091_LC8757, lafrate et al. (2004)                                           |
| 6          | q23.3         | 135.24     | 137.36   | 2.121275   | 4%        | TN.12303, TN.BC2968                                 | ALDH8A1, HBS1L, MYB, AH1, PDE7B, FAM54A, BCLAF1, MAP7, MAP3K5, PEX7,           | hsa-mir-548a-2                    |                                                                                                                      |
| 7          | p11.2         | 54.99      | 55.7     | 0.713173   | 4%        | TN.10665, TN.BC184                                  | EGFR, LANCL2                                                                   |                                   |                                                                                                                      |
| 7          | q11.1         | 61.06      | 61.27    | 0.207558   | 4%        | TN.4643, TN.B2                                      |                                                                                |                                   | V_4538_LC9545, Wong et al. (2007), V_4539_LC9545, Wong et al. (2007)                                                 |
| 7          | q11.21        | 64.42      | 65.19    | 0.769661   | 4%        | TN.4643, TN.7880                                    | ZNF117, ERV3, ZNF92                                                            |                                   | V_0722_LC9554, Sharp et al. (2005), V_2101_LC9554, Locke et al. (2006)                                               |
| 7          | q21.13-q21.2  | 90.86      | 91.46    | 0.604123   | 4%        | TN.845, TN.BC2968                                   | FZD1, MTERF                                                                    |                                   |                                                                                                                      |
| 7          | q21.2-q21.3   | 91.6       | 93.68    | 2.082652   | 4%        | TN.4643, TN.B45                                     | AKAP9, CYP51A1, KRIT1, ANKIB1, GATAD1, PEX1, C7orf64, FAM133B, CDK6, SAMD9,    | hsa-mir-1285-1, hsa-mir-653, hsa- |                                                                                                                      |
| 7          | q33           | 136.97     | 137.46   | 0.490678   | 4%        | TN.7880, TN.NT005                                   | PTN, DGKI, RPL41                                                               |                                   |                                                                                                                      |
| 7          | q34           | 138.98     | 139.72   | 0.738026   | 4%        | TN.7880, TN.B18                                     | UBN2, LUC7L2, C7orf55, KLRG2, CLEC2L, HIPK2, TBXAS1                            |                                   |                                                                                                                      |
| 7          | q36.1         | 150.84     | 151.65   | 0.813473   | 4%        | TN.B18, TN.NT001                                    | AGAP3, GBX1, ASB10, ABCF2, SMARCD3, NUB1, WDR86, CRYM, RHEB, PRKAG2,           | hsa-mir-671                       |                                                                                                                      |
| 8          | p12-q24.3     | 34.93      | 146.24   | 111.305555 | 32%       | TN.10646, TN.10662, TN.10665, TN.11093, TN.12303,   | UNC5D, UNC5L, ZNF703, ERLIN2, PROSC, GPR124, BRF2, RAB11FIP1, GOT1L1,          | hsa-mir-486, hsa-mir-124-2, hsa-  | V_0119_LC10711, lafrate et al. (2004), V_0121_LC10727, lafrate et al. (2004), V_0123_LC10906, lafrate et al. (2004), |
| 9          | p24.3-p22.3   | 1.98       | 15.14    | 13.161039  | 9%        | TN.7880, TN.B6, TN.B65, TN.BC2968, TN.BC3044,       | SMARCA2, VLDLR, KCN2V, KIAA0020, CARMIL, RFX3, GLIS3, SLC1A1, C9orf68,         | hsa-mir-101-2                     | V_4615_LC11143, Wong et al. (2007)                                                                                   |
| 9          | p22.3-p22.2   | 15.98      | 16.87    | 0.890872   | 4%        | TN.BC2968, TN.NT005                                 | C9orf93, C9orf92, BNC2                                                         |                                   |                                                                                                                      |
| 9          | p22.2-p21.3   | 17.65      | 20.48    | 2.82604    | 4%        | TN.BC2968, TN.NT005                                 | SH3GL2, ADAMTSL1, FAM154A, RRAA, HAU56, ADP, DENND4C, RPS6, ACER2,             |                                   |                                                                                                                      |
| 10         | p15.3-p12.1   | 0.06       | 26.98    | 26.920666  | 16%       | TN.10137, TN.10752, TN.12523, TN.7880, TN.B17,      | ZMYND11, DIP2C, C10orf108, LARP5, GTPBP4, IDI2, WDR37, ADARB2, PFKF,           | hsa-mir-1265, hsa-mir-511-1, hsa- | V_4664_LC11931, Wong et al. (2007), V_4665_LC12095, Wong et al. (2007), V_4666_LC12101, Wong et al. (2007),          |
| 10         | p11.21        | 36.01      | 36.33    | 0.319526   | 4%        | TN.NT005, TN.NT0067                                 |                                                                                |                                   |                                                                                                                      |
| 10         | q11.22        | 46.69      | 48.28    | 1.589695   | 4%        | TN.12303, TN.NT0067                                 | FAM35B, SYY15, GPRIN2, ANXA8L1, PYPY1, FAM25B, BMS1P2, CTSLL7, FAM25HP,        |                                   | V_0764_LC12274, Sharp et al. (2005), V_2153_LC12274, Locke et al. (2006), V_4685_LC12274, Wong et al. (2007),        |
| 10         | q11.23        | 51.77      | 52.58    | 0.804264   | 4%        | TN.B78, TN.NT0067                                   | FAM21A, ASA12, SGMS1, ASA2B, A1CF                                              |                                   | V_2156_LC12305, Locke et al. (2006)                                                                                  |
| 10         | q21.1-q21.3   | 60.43      | 66.41    | 5.988516   | 5%        | TN.B17, TN.B41, TN.BC3044, TN.NT0067                | BICC1, PHYHIP1, FAM13C, SLC16A9, CCDC6, C10orf40, ANK3, ARL4P, CDC2,           | hsa-mir-1296                      | V_4697_LC12385, Wong et al. (2007), V_4698_LC12387, Wong et al. (2007), V_4699_LC12389, Wong et al. (2007)           |
| 10         | q22.1         | 71.84      | 73.6     | 1.766933   | 5%        | TN.10752, TN.11093, TN.NT0067                       | H2AFY2, AIFM2, TYSND1, SAR1A, PPA1, NFFRF1, LRRC20, EIF4EBP2, NODAL,           |                                   |                                                                                                                      |
| 10         | q22.3         | 78.65      | 81.08    | 2.42975    | 4%        | TN.B69, TN.NT0067                                   | KCNMA1, DLG5, POLR3A, RPS24, ZMI2                                              |                                   | V_0138_LC12468, lafrate et al. (2004), V_2157_LC12477, Locke et al. (2006), V_2158_LC12478, Locke et al. (2006),     |
| 10         | q26.12-q26.13 | 123.05     | 125.68   | 2.630053   | 4%        | TN.10752, TN.9776                                   | FGFR2, ATE1, NSMCE4A, TACC2, BTBD16, PLEKH41, HTRA1, DMBT1, C10orf120,         |                                   | V_4714_LC12735, Wong et al. (2007)                                                                                   |
| 11         | p13-p12       | 34.17      | 39.22    | 5.056173   | 5%        | TN.B65, TN.B73, TN.B79                              | NAT10, APTB2, CAT, ELF5, EHF, AIP1, PDHX, CD44, SLC1A2, PAMP1, FXJ1, TRIM44,   |                                   | V_4736_LC13107, Wong et al. (2007), V_4737_LC13107, Wong et al. (2007)                                               |
| 11         | q13.3-q13.4   | 69.6       | 70.53    | 0.925982   | 5%        | TN.10499, TN.4643, TN.BC3047                        | FGF3, ANO1, FADD, PPPIA1, CTTN, SHANK2                                         | hsa-mir-548k                      |                                                                                                                      |
| 11         | q23.3         | 119.48     | 119.96   | 0.480124   | 4%        | TN.3701, TN.9961                                    | PVRL1                                                                          |                                   |                                                                                                                      |
| 12         | p13.33-p13.31 | 0.15       | 6.14     | 5.995011   | 13%       | TN.12303, TN.12523, TN.4643, TN.9961, TN.B69,       | FAM138D, IQSEC3, SLC6A12, SLC6A13, KDMA, CCDC77, BAGALNT3, NINJ2, WNK1,        |                                   | V_0161_LC13778, lafrate et al. (2004), V_4765_LC13757, Wong et al. (2007), V_4766_LC13773, Wong et al. (2007)        |
| 12         | p13.31-p13.2  | 9.25       | 12.33    | 3.087283   | 5%        | TN.9961, TN.B6, TN.BC3044, TN.BC3047, TN.NT004      | A2M, PZP, PTMAMP4, DDX12, KLRB1, CLEC2D, CLEC1L, CD69, KLRF1, CLEC2B,          |                                   | V_4769_LC13838, Wong et al. (2007)                                                                                   |
| 12         | p13.2-p12.3   | 12.47      | 19       | 6.529615   | 4%        | TN.BC3047, TN.NT004                                 | MANSC1, LOH12CR2, LOH12CR1, DUSP16, CREBL2, GPR19, CDKN1C, APCOL1,             | hsa-mir-613, hsa-mir-614          | V_4770_LC13869, Wong et al. (2007)                                                                                   |
| 12         | p12.3-p11.1   | 19.74      | 33.44    | 13.704219  | 7%        | TN.B78, TN.BC3047, TN.NT0001, TN.NT004, TN.NT005    | PDE3A, SLC10C1, SLC01B3, SLC01A2, IAPP, PYROXD1, RECLD,                        | hsa-mir-920                       | V_0162_LC13887, lafrate et al. (2004), V_0163_LC13898, lafrate et al. (2004), V_4772_LC13891, Wong et al. (2007),    |
| 13         | q31.3         | 93.64      | 94.49    | 0.850316   | 4%        | TN.7880, TN.BC2697                                  | GPC6                                                                           |                                   |                                                                                                                      |
| 13         | q32.3         | 101.23     | 101.68   | 0.448493   | 4%        | TN.7880, TN.BC2697                                  | A2LD1, TMTC4                                                                   |                                   |                                                                                                                      |
| 13         | q33.2-q33.3   | 106.37     | 109.06   | 2.686443   | 4%        | TN.7880, TN.B65                                     | EFNB2, ARGLU1, FAM155A, LIGA, ABHD13, INFG13B                                  | hsa-mir-1267                      | V_4817_LC15210, Wong et al. (2007), V_4818_LC15212, Wong et al. (2007), V_0361_LC15215, Shaw-Smith et al. (2004)     |
| 13         | q33.3-q34     | 109.83     | 115.07   | 5.241634   | 5%        | TN.4274, TN.7880, TN.BC2697                         | MYO16, IRS2, COL4A1, COL4A2, RAB20, CARO, CAR2, CAR5, TNFSF109, ANKRD10,       |                                   | V_4819_LC15248, Wong et al. (2007), V_4820_LC15248, Wong et al. (2007)                                               |
| 14         | q11.2         | 19.97      | 20.41    | 0.446278   | 4%        | TN.B2, TN.B45                                       | OR11H2, OR4O3, OR4H12P, OR4M1, OR4N2, OR4K2, OR4K5, OR4K1                      |                                   |                                                                                                                      |
| 15         | q11.2         | 20.83      | 21.11    | 0.284766   | 4%        | TN.B2, TN.B78                                       | BCL8                                                                           |                                   | V_4879_LC16090, Wong et al. (2007)                                                                                   |
| 15         | q26.2         | 95.9       | 97.64    | 1.741426   | 4%        | TN.12523, TN.B18                                    | NR2F2, FAM149B2, SPATA8                                                        | hsa-mir-1469                      | V_0192_LC16541, lafrate et al. (2004)                                                                                |
| 15         | q26.2-q26.3   | 98.31      | 99.78    | 1.476949   | 4%        | TN.B18, TN.B64                                      | ARRDC4, FAM169B, IGF1R, SYNM, TTC23                                            |                                   | V_2201_LC16579, Locke et al. (2006)                                                                                  |
| 15         | q26.3         | 101.37     | 102.27   | 0.905945   | 4%        | TN.B18, TN.B64                                      | ALDH1A3, LRRK1, CHSY1, SNRPA1, PCSK6, TM2D3, TARSL2                            |                                   |                                                                                                                      |
| 19         | p13.12        | 14.47      | 15.44    | 0.965629   | 4%        | TN.11093, TN.7880                                   | CD97, DDX39, PKN1, PTGER1, GIPC1, DNAJB1, GSPN2, NDUFB7, CLEC17A, EMR3,        | hsa-mir-639                       | V_5090_LC18847, Wong et al. (2007)                                                                                   |
| 19         | q11-q13.11    | 27.95      | 32.91    | 4.954227   | 9%        | TN.7880, TN.B41, TN.B6, TN.BC2968, TN.NT0015,       | UQCRRF51, VSTM2B, POP4, PLEKHF1, C19orf12, CCNE1, C19orf2, ZNF536, TSHZ3,      |                                   | V_5096_LC18924, Wong et al. (2007)                                                                                   |
| 19         | q13.11        | 33.76      | 34.52    | 0.763047   | 4%        | TN.B41, TN.B81                                      | CEBPG, PEPD, CHST8, KCTD15                                                     |                                   |                                                                                                                      |
| 19         | q13.12        | 37.85      | 38.21    | 0.362527   | 4%        | TN.7880, TN.B41                                     | ZNF527, ZNF569, ZNF570, ZNF793, ZNF540, ZNF571, ZFP30, ZNF781, ZNF607          |                                   |                                                                                                                      |
| 21         | q11.2-q21.1   | 15.74      | 20.45    | 4.707221   | 5%        | TN.B18, TN.B81, TN.NT0067                           | FCGBP, PSMC4, ZNF546, ZNF780B, ZNF780A, MAP3K10, TTC9B, CNTD2, AKT2,           | hsa-mir-641                       |                                                                                                                      |
| 21         | q21.2-q21.3   | 24.3       | 30.26    | 5.957184   | 4%        | TN.3319, TN.NT0067                                  | HSPA13, SAMS1, NRIP1, USP25, C21orf34, C21orf37, CXADR, BTG3, C21orf91,        | hsa-mir-99a, hsa-let-7c, hsa-mir- | V_5159_LC20079, Wong et al. (2007)                                                                                   |
| 21         | q21.3-q22.11  | 31.06      | 31.59    | 0.526838   | 4%        | TN.3319, TN.NT0067                                  | MRPL39, JAM2, ATP5J, GABPA, APP, CYR1, ADAMTS1, ADAMTS5, NEMAM1                | hsa-mir-155                       |                                                                                                                      |
| 21         | q22.13-q22.3  | 39         | 47.37    | 8.371448   | 5%        | TN.3319, TN.BC2697, TN.NT005, TN.NT0067             |                                                                                |                                   |                                                                                                                      |
