# Supplementary material
Source: PubMed Central journal article supplement (PMC2852518)
Supplement: NIHMS28236-supplement-6.pdf [file NIHMS28236-supplement-6.pdf]

Supplementary Table 6: List of genes whose expression correlates with copy number changes as defined by a Pearson's correlation adjusted p<0.05.

| Symbol        | Chromosome | Cytoband       | Start (bp) | End (bp)  | Pearson's p value | Pearson's adjusted p value | Pearson r value | Gains | Losses | Amplifications |
|---------------|------------|----------------|------------|-----------|-------------------|----------------------------|-----------------|-------|--------|----------------|
| C20orf26      | 20         | 20p11.23       | 20033196   | 20341346  | 0.0003            | 0.0068                     | -0.5805         | 4     | 6      | 0              |
| LIPF          | 10         | 10q23.31       | 90424084   | 90438572  | 0.0004            | 0.0089                     | -0.5822         | 3     | 10     | 0              |
| DEPDC7        | 11         | 11p13          | 33037410   | 33055138  | 0.0004            | 0.0091                     | -0.5841         | 5     | 3      | 0              |
| TAS1R1        | 1          | 1p36.31        | 6615338    | 6639816   | 0.0004            | 0.0092                     | -0.5833         | 2     | 13     | 0              |
| TUBA4B        | 2          | 2q35           | 220130946  | 220136910 | 0.0004            | 0.0094                     | -0.5822         | 3     | 6      | 0              |
| CABP4         | 11         | 11q13.2        | 67222818   | 67226651  | 0.0007            | 0.0131                     | -0.6411         | 4     | 2      | 0              |
| SGPP2         | 2          | 2q36.1         | 223288771  | 223425667 | 0.0007            | 0.0132                     | -0.6410         | 1     | 6      | 0              |
| DNAH3         | 16         | 16p12.3        | 20944433   | 21170762  | 0.0008            | 0.0136                     | -0.6386         | 1     | 4      | 0              |
| MEP1A         | 6          | 6p12.3         | 46761094   | 46807519  | 0.0009            | 0.0148                     | -0.6327         | 11    | 1      | 0              |
| CCDC114       | 19         | 19q13.33       | 48799710   | 48825151  | 0.0010            | 0.0161                     | -0.6270         | 3     | 7      | 0              |
| THSD7B        | 2          | 2q22.1         | 137523115  | 138435287 | 0.0012            | 0.0172                     | -0.6222         | 4     | 8      | 0              |
| VAX1          | 10         | 10q25.3        | 118888032  | 118897812 | 0.0012            | 0.0176                     | -0.6207         | 3     | 7      | 0              |
| KCTD7         | 7          | 7q11.21        | 66093890   | 66276446  | 0.0012            | 0.0177                     | -0.6204         | 3     | 4      | 1              |
| NRXN2         | 11         | 11q13.1        | 64373646   | 64490660  | 0.0015            | 0.0200                     | -0.6129         | 6     | 3      | 0              |
| TRERF1        | 6          | 6p21.1         | 42192669   | 42419789  | 0.0015            | 0.0201                     | -0.6128         | 11    | 1      | 0              |
| EDA           | 23         | 23q13.1        | 68835911   | 69259311  | 0.0018            | 0.0231                     | -0.6035         | 1     | 8      | 0              |
| TSC2          | 16         | 16p13.3        | 2097981    | 2138721   | 0.0018            | 0.0234                     | -0.6025         | 5     | 4      | 0              |
| SNX26         | 19         | 19q13.12       | 36266476   | 36279724  | 0.0021            | 0.0253                     | -0.5966         | 5     | 1      | 0              |
| BEND2         | 23         | 23p22.13       | 18181053   | 18239024  | 0.0023            | 0.0271                     | -0.5920         | 6     | 10     | 0              |
| DNASE1L1      | 23         | 23q28          | 153629579  | 153640428 | 0.0024            | 0.0283                     | -0.5892         | 6     | 10     | 0              |
| OR4D11        | 11         | 11q12.1        | 59271049   | 59271984  | 0.0027            | 0.0297                     | -0.5853         | 7     | 1      | 0              |
| SPAG16        | 2          | 2q34           | 214149113  | 215275225 | 0.0028            | 0.0307                     | -0.5827         | 2     | 3      | 0              |
| SLC29A2       | 11         | 11q13.2        | 66129993   | 66139291  | 0.0028            | 0.0309                     | -0.5822         | 4     | 1      | 0              |
| AL360181.37-1 | 10         | 10q26.3        | 135137733  | 135138209 | 0.0030            | 0.0323                     | -0.5789         | 3     | 7      | 0              |
| LRG1          | 19         | 19p13.3        | 4537227    | 4540036   | 0.0031            | 0.0324                     | -0.5786         | 0     | 6      | 0              |
| SLC6A18       | 5          | 5p15.33        | 1225470    | 1246303   | 0.0031            | 0.0326                     | -0.5782         | 10    | 4      | 0              |
| MORN1         | 1          | 1p36.33-p36.32 | 2252696    | 2356219   | 0.0031            | 0.0329                     | -0.5775         | 4     | 13     | 0              |
| EFNB3         | 17         | 17p13.1        | 7608520    | 7614689   | 0.0032            | 0.0331                     | -0.5771         | 0     | 11     | 0              |
| IGFALS        | 16         | 16p13.3        | 1840416    | 1843734   | 0.0032            | 0.0332                     | -0.5768         | 5     | 4      | 0              |
| SIGLEC6       | 19         | 19q13.41       | 52020951   | 52035110  | 0.0033            | 0.0341                     | -0.5750         | 3     | 5      | 0              |
| AC018552.6    | 16         | 16p21          | 57537053   | 57722508  | 0.0033            | 0.0343                     | -0.5746         | 3     | 10     | 0              |
| KRTAP1-1      | 17         | 17q21.2        | 39196811   | 39197713  | 0.0033            | 0.0344                     | -0.5742         | 3     | 10     | 0              |
| ABRA          | 8          | 8q23.1         | 107771712  | 107782472 | 0.0036            | 0.0364                     | -0.5703         | 18    | 0      | 2              |
| C9orf47       | 9          | 9q22.1         | 91605778   | 91611055  | 0.0038            | 0.0379                     | -0.5674         | 4     | 7      | 0              |
| AF227510.7    | 21         | 21q21.3        | 30274101   | 30276019  | 0.0039            | 0.0382                     | -0.5667         | 7     | 3      | 0              |
| FLRT1         | 11         | 11q13.1        | 63871362   | 63886645  | 0.0043            | 0.0405                     | -0.5621         | 4     | 3      | 0              |
| RP1           | 8          | 8q11.23-q12.1  | 55471745   | 55682530  | 0.0043            | 0.0405                     | -0.5620         | 11    | 2      | 0              |
| TMEFF2        | 2          | 2q32.3         | 192813769  | 193059659 | 0.0044            | 0.0413                     | -0.5604         | 5     | 2      | 0              |
| TYRL          | 11         | 11q14.3        | 88911040   | 89028926  | 0.0044            | 0.0416                     | -0.5599         | 8     | 3      | 0              |
| KLK3          | 19         | 19q13.33       | 51358171   | 51364020  | 0.0048            | 0.0436                     | -0.5561         | 3     | 5      | 0              |
| SH2D4B        | 10         | 10q23.1        | 82297658   | 82406316  | 0.0048            | 0.0437                     | -0.5559         | 2     | 5      | 0              |
| PSG5          | 19         | 19q13.31       | 43670408   | 43690688  | 0.0048            | 0.0440                     | -0.5553         | 4     | 7      | 0              |
| MGAT1         | 5          | 5q35.3         | 180217541  | 180242541 | 0.0053            | 0.0469                     | -0.5504         | 5     | 5      | 0              |
| ALDH1A2       | 15         | 15q21.3        | 58245627   | 58358616  | 0.0053            | 0.0469                     | -0.5502         | 1     | 6      | 0              |
| PEX5          | 12         | 12p13.31       | 7341759    | 7371170   | 0.0054            | 0.0470                     | -0.5501         | 10    | 4      | 0              |
| TAS2R8        | 12         | 12p13.2        | 10958650   | 10959579  | 0.0055            | 0.0478                     | -0.5488         | 7     | 5      | 0              |
| UNC5D         | 8          | 8p12           | 35092975   | 35654068  | 0.0056            | 0.0487                     | -0.5473         | 2     | 10     | 0              |
| FNDC1         | 6          | 6q25.3         | 159590429  | 159693137 | 0.0064            | 0.0527                     | -0.5406         | 3     | 6      | 0              |
| KRTAP2-2      | 17         | 17q21.2        | 39210750   | 39211482  | 0.0066            | 0.0538                     | -0.5390         | 3     | 10     | 0              |
| MAP3K10       | 19         | 19q13.2        | 40697651   | 40721481  | 0.0067            | 0.0542                     | -0.5384         | 3     | 7      | 0              |
| RSP04         | 20         | 20p13          | 939098     | 982904    | 0.0067            | 0.0547                     | -0.5376         | 6     | 7      | 1              |
| FYCO1         | 3          | 3p21.31        | 45959396   | 46037307  | 0.0080            | 0.0615                     | -0.5280         | 1     | 8      | 0              |
| FLYWCH1       | 16         | 16p13.3        | 2961980    | 3001208   | 0.0081            | 0.0621                     | -0.5272         | 2     | 3      | 0              |
| PCSK5         | 9          | 9q21.13        | 78505560   | 78974292  | 0.0082            | 0.0626                     | -0.5265         | 3     | 6      | 0              |
| RUNDC2A       | 16         | 16p13.13       | 12070602   | 12147141  | 0.0083            | 0.0630                     | -0.5259         | 3     | 3      | 0              |
| OR10H4        | 19         | 19p13.12       | 16059818   | 16060768  | 0.0087            | 0.0649                     | -0.5233         | 3     | 2      | 1              |
| CCDC48        | 3          | 3q21.3         | 128749300  | 128759583 | 0.0089            | 0.0657                     | -0.5222         | 7     | 2      | 0              |
| KLK12         | 19         | 19q13.41       | 51532348   | 51538148  | 0.0089            | 0.0659                     | -0.5218         | 3     | 5      | 0              |
| IL17C         | 16         | 16q24.3        | 88705001   | 88706884  | 0.0091            | 0.0669                     | -0.5205         | 2     | 9      | 0              |
| PDE2A         | 11         | 11q13.4        | 72287186   | 72385773  | 0.0092            | 0.0673                     | -0.5200         | 3     | 3      | 0              |
| RGS3          | 9          | 9q32           | 116222537  | 116360018 | 0.0096            | 0.0691                     | -0.5176         | 4     | 8      | 0              |
| PRRT3         | 3          | 3p25.3         | 9986657    | 9994078   | 0.0097            | 0.0697                     | -0.5170         | 6     | 2      | 0              |
| CHRNA2        | 2          | 2q37.1         | 233404437  | 233411038 | 0.0097            | 0.0699                     | -0.5167         | 1     | 10     | 0              |
| RP11-159J2.1  | 13         | 13q22.2        | 75812080   | 75814476  | 0.0098            | 0.0702                     | -0.5164         | 5     | 4      | 0              |
| ZNF589        | 3          | 3p21.31        | 48282590   | 48340743  | 0.0101            | 0.0716                     | -0.5147         | 0     | 8      | 0              |
| C11orf64      | 11         | 11q12.2        | 60383209   | 60454622  | 0.0102            | 0.0725                     | -0.5137         | 7     | 1      | 0              |
| RP13-126P21.1 | 23         | 23p11.4        | 39724678   | 39725144  | 0.0103            | 0.0730                     | -0.5132         | 3     | 11     | 0              |
| EPB41L3       | 18         | 18p11.31       | 5392388    | 5543986   | 0.0104            | 0.0733                     | -0.5128         | 8     | 4      | 0              |
| UTF1          | 10         | 10q26.3        | 135043778  | 135045062 | 0.0104            | 0.0734                     | -0.5126         | 3     | 8      | 0              |
| SERPINA12     | 14         | 14q32.13       | 94953621   | 94984181  | 0.0105            | 0.0740                     | -0.5120         | 4     | 10     | 0              |
| CES8          | 16         | 16q22.1        | 67022633   | 67043661  | 0.0106            | 0.0741                     | -0.5119         | 7     | 7      | 0              |
| CCDC102B      | 18         | 18q22.1        | 66382491   | 66722426  | 0.0107            | 0.0750                     | -0.5109         | 8     | 7      | 0              |
| IL10          | 1          | 1q32.1         | 206940947  | 206945839 | 0.0108            | 0.0755                     | -0.5104         | 16    | 1      | 0              |
| CAPN1         | 11         | 11q13.1        | 64949343   | 64979476  | 0.0112            | 0.0771                     | -0.5084         | 5     | 2      | 0              |
| OR4E1P        | 14         | 14q11.2        | 22138201   | 22139150  | 0.0113            | 0.0777                     | -0.5077         | 2     | 4      | 0              |
| OR2C1         | 16         | 16p13.3        | 3405889    | 3406924   | 0.0115            | 0.0784                     | -0.5070         | 1     | 3      | 0              |
| POLA1         | 23         | 23p22.11-p21.3 | 24712056   | 25015103  | 0.0116            | 0.0789                     | -0.5065         | 2     | 10     | 0              |
| IL26          | 12         | 12q15          | 68595129   | 68619571  | 0.0116            | 0.0791                     | -0.5061         | 4     | 8      | 0              |
| SLC22A11      | 11         | 11q13.1        | 64323090   | 64338999  | 0.0116            | 0.0792                     | -0.5060         | 6     | 3      | 0              |
| PGRCM1        | 23         | 23q24          | 118370211  | 118378428 | 0.0117            | 0.0795                     | -0.5056         | 1     | 11     | 0              |
| CCDC109A      | 10         | 10q22.1        | 74451889   | 74647450  | 0.0119            | 0.0803                     | -0.5047         | 3     | 4      | 0              |
| A2BP1         | 16         | 16p13.3        | 7382751    | 7763340   | 0.0120            | 0.0807                     | -0.5043         | 3     | 4      | 0              |
| CPA6          | 8          | 8q13.2         | 68334405   | 68658620  | 0.0122            | 0.0817                     | -0.5030         | 16    | 1      | 0              |
| RAMP2         | 17         | 17q21.31       | 40913205   | 40915059  | 0.0124            | 0.0823                     | -0.5021         | 1     | 11     | 0              |
| TGFA          | 2          | 2p13.3         | 70874416   | 70781105  | 0.0125            | 0.0826                     | -0.5016         | 5     | 1      | 0              |
| DNAH2         | 17         | 17p13.1        | 7623030    | 7737058   | 0.0126            | 0.0829                     | -0.5013         | 0     | 12     | 0              |
| FAM81B        | 5          | 5p15           | 94727048   | 94786144  | 0.0126            | 0.0830                     | -0.5011         | 0     | 13     | 0              |
| PELP1         | 17         | 17p13.2        | 4574680    | 4607632   | 0.0129            | 0.0842                     | -0.4999         | 0     | 10     | 0              |
| MACROD1       | 11         | 11q13.1        | 63766031   | 63933585  | 0.0131            | 0.0851                     | -0.4990         | 4     | 3      | 0              |
| CYP4F12       | 19         | 19p13.12       | 15783886   | 15807984  | 0.0134            | 0.0862                     | -0.4976         | 3     | 2      | 1              |
| PCDH8         | 13         | 13q14.3        | 53418114   | 53422775  | 0.0134            | 0.0863                     | -0.4974         | 4     | 5      | 0              |
| OR9I1         | 11         | 11q12.1        | 57885972   | 57886916  | 0.0134            | 0.0864                     | -0.4973         | 6     | 1      | 0              |
| MYCN          | 2          | 2p24.3         | 16080679   | 16087128  | 0.0135            | 0.0865                     | -0.4971         | 6     | 1      | 0              |
| TMEM171       | 5          | 5q13.2         | 72416402   | 72427641  | 0.0135            | 0.0866                     | -0.4970         | 0     | 16     | 0              |
| SLC39A4       | 8          | 8q24.3         | 145637799  | 145642273 | 0.0135            | 0.0866                     | -0.4969         | 15    | 1      | 0              |
| PTCRA         | 6          | 6p21.1         | 42883727   | 42893898  | 0.0138            | 0.0879                     | -0.4956         | 11    | 1      | 0              |
| HAPLN4        | 19         | 19p13.11       | 19366456   | 19373605  | 0.0138            | 0.0880                     | -0.4954         | 4     | 3      | 0              |
| CIITA         | 16         | 16p13.13       | 10971055   | 11018840  | 0.0142            | 0.0898                     | -0.4938         | 3     | 4      | 0              |
| AC011499.5    | 19         | 19p13.3        | 5782972    | 5784776   | 0.0143            | 0.0902                     | -0.4932         | 0     | 6      | 0              |
| BEST2         | 19         | 19p13.2        | 12863407   | 12869269  | 0.0143            | 0.0903                     | -0.4932         | 4     | 4      | 0              |
| LRRC3         | 21         | 21q22.3        | 45875393   | 45878730  | 0.0149            | 0.0926                     | -0.4906         | 5     | 6      | 0              |
| MS4A15        | 11         | 11q12.2        | 60524340   | 60544204  | 0.0150            | 0.0927                     | -0.4904         | 7     | 3      | 0              |
| ATHL1         | 11         | 11p15.5        | 289138     | 295688    | 0.0150            | 0.0928                     | -0.4903         | 1     | 3      | 0              |
| ACBD4         | 17         | 17q21.31       | 43209967   | 43221539  | 0.0151            | 0.0930                     | -0.4901         | 2     | 11     | 0              |
| AC023632.19   | 8          | 8q22.1         | 95558771   | 95560630  | 0.0151            | 0.0930                     | -0.4901         | 14    | 0      | 2              |
| CAMK1         | 17         | 17p13.2        | 3763609    | 3796337   | 0.0154            | 0.0942                     | -0.4888         | 0     | 10     | 0              |
| LEPREL2       | 12         | 12p13.31       | 6930870    | 6949018   | 0.0154            | 0.0945                     | -0.4886         | 12    | 3      | 0              |
| PF4           | 4          | 4q13.3         | 74846796   | 74847715  | 0.0157            | 0.0959                     | -0.4872         | 4     | 3      | 0              |
| TMIGD2        | 19         | 19p13.3        | 4292237    | 4302428   | 0.0158            | 0.0959                     | -0.4872         | 0     | 6      | 0              |
| UBQLN2        | 23         | 23p11.21       | 56590072   | 56593328  | 0.0159            | 0.0966                     | -0.4865         | 1     | 12     | 0              |
| AP000346.1-1  | 22         | 22q11.23       | 23991396   | 23991686  | 0.0160            | 0.0968                     | -0.4863         | 2     | 9      | 0              |
| FAM171A2      | 17         | 17q21.31       | 42431101   | 42441235  | 0.0162            | 0                          |                 |       |        |                |

Supplementary Table 6  
Page 2

|              |    |  |               |           |           |        |        |         |    |    |     |
|--------------|----|--|---------------|-----------|-----------|--------|--------|---------|----|----|-----|
| EVC2         | 4  |  | 4p16.2        | 5544858   | 5711275   | 0.0262 | 0.1332 | -0.4530 | 0  | 14 | 0   |
| CASP10       | 2  |  | 2q33.1        | 202047621 | 202094110 | 0.0266 | 0.1345 | -0.4519 | 2  | 6  | 0   |
| IL2          | 4  |  | 4q27          | 123372630 | 123377650 | 0.0267 | 0.1346 | -0.4518 | 4  | 2  | 0   |
| PLXNC1       | 12 |  | 12q22         | 94542748  | 94701444  | 0.0274 | 0.1368 | -0.4499 | 1  | 6  | 0   |
| MOV10L1      | 22 |  | 22q13.33      | 50528474  | 50600115  | 0.0278 | 0.1376 | -0.4489 | 3  | 6  | 0   |
| STAP2        | 19 |  | 19p13.3       | 4324041   | 4338847   | 0.0278 | 0.1376 | -0.4489 | 0  | 6  | 0   |
| LRRC31       | 3  |  | 3q26.2        | 169557042 | 169587662 | 0.0278 | 0.1377 | -0.4489 | 15 | 0  | 1   |
| ABCB1        | 7  |  | 7q21.12       | 87132948  | 87342610  | 0.0278 | 0.1377 | -0.4488 | 8  | 0  | 0   |
| HMX1         | 4  |  | 4p16.1        | 8868773   | 8873543   | 0.0281 | 0.1387 | -0.4481 | 1  | 15 | 0   |
| ADCY1        | 7  |  | 7p12.3        | 45613739  | 45762715  | 0.0282 | 0.1389 | -0.4478 | 4  | 5  | 0   |
| SLCO1B3      | 12 |  | 12p12.2       | 20963638  | 21069658  | 0.0287 | 0.1407 | -0.4465 | 6  | 4  | 0   |
| AC109486.2-1 | 5  |  | 5q12.1        | 59725730  | 59726103  | 0.0288 | 0.1409 | -0.4464 | 1  | 13 | 0   |
| HCN1         | 5  |  | 5p12          | 45259368  | 45696220  | 0.0294 | 0.1430 | -0.4449 | 5  | 3  | 0   |
| CPLX3        | 15 |  | 15q24.1       | 75118951  | 75124136  | 0.0294 | 0.1431 | -0.4447 | 3  | 4  | 0   |
| SLC11A1      | 2  |  | 2q35          | 219246752 | 219261616 | 0.0299 | 0.1446 | -0.4436 | 2  | 7  | 0   |
| PSD3         | 8  |  | 8p22          | 18384813  | 18871196  | 0.0300 | 0.1448 | -0.4434 | 1  | 10 | 0   |
| AP000769.5-1 | 11 |  | 11q13.1       | 65222653  | 65223178  | 0.0301 | 0.1451 | -0.4432 | 5  | 1  | 0   |
| FAM40B       | 7  |  | 7q32.1        | 129073731 | 129128240 | 0.0302 | 0.1456 | -0.4429 | 9  | 0  | 0   |
| PPP1R1C      | 2  |  | 2q31.3        | 182850551 | 182996109 | 0.0302 | 0.1456 | -0.4428 | 6  | 2  | 0   |
| SLC46A3      | 13 |  | 13q12.3       | 29274220  | 29293150  | 0.0303 | 0.1459 | -0.4426 | 1  | 4  | 0   |
| RNF17        | 13 |  | 13q12.12      | 25338301  | 25454059  | 0.0304 | 0.1460 | -0.4425 | 1  | 4  | 0   |
| AC091980.4-1 | 5  |  | 5q35.1        | 170772048 | 170772634 | 0.0308 | 0.1474 | -0.4415 | 3  | 8  | 0   |
| STK11IP      | 2  |  | 2q35          | 220462582 | 220481173 | 0.0308 | 0.1474 | -0.4415 | 1  | 6  | 0   |
| IL4I1        | 19 |  | 19q13.33      | 50392916  | 50432796  | 0.0308 | 0.1474 | -0.4415 | 3  | 6  | 0   |
| AC002472.8   | 22 |  | 22q11.21      | 21357184  | 21368581  | 0.0310 | 0.1480 | -0.4410 | 1  | 10 | 0   |
| IL2RA        | 10 |  | 10p15.1       | 6041829   | 6104272   | 0.0311 | 0.1483 | -0.4408 | 15 | 0  | 1   |
| FCHSD1       | 5  |  | 5q31.3        | 141018870 | 141030986 | 0.0315 | 0.1494 | -0.4399 | 1  | 14 | 0   |
| CNGA2        | 23 |  | 23q28         | 150906922 | 150914036 | 0.0316 | 0.1497 | -0.4397 | 4  | 11 | 0   |
| CADI2        | 3  |  | 3p12.1        | 85008759  | 86117948  | 0.0316 | 0.1500 | -0.4395 | 5  | 2  | 0   |
| PRUNE2       | 9  |  | 9q21.2        | 79326282  | 79521003  | 0.0317 | 0.1502 | -0.4394 | 3  | 7  | 0   |
| PAGE4        | 23 |  | 23p11.23      | 49593863  | 49599831  | 0.0317 | 0.1502 | -0.4394 | 2  | 13 | 0   |
| CPT1B        | 22 |  | 22q13.33      | 51007290  | 51021394  | 0.0318 | 0.1505 | -0.4392 | 6  | 5  | 0   |
| NRXN3        | 14 |  | 14q24.3-q31.1 | 79081275  | 80330758  | 0.0318 | 0.1506 | -0.4390 | 1  | 10 | 0   |
| LUM          | 12 |  | 12q21.33      | 91497232  | 91505542  | 0.0321 | 0.1513 | -0.4385 | 2  | 7  | 0   |
| CCIN         | 9  |  | 9p13.3        | 36169389  | 36171329  | 0.0322 | 0.1516 | -0.4382 | 5  | 9  | 0   |
| AL049830.3-1 | 14 |  | 14q12         | 31290633  | 31291068  | 0.0322 | 0.1516 | -0.4382 | 4  | 4  | 0   |
| CACNA1i      | 22 |  | 22q13.1       | 39966758  | 40085735  | 0.0323 | 0.1520 | -0.4380 | 2  | 6  | 0   |
| DCC          | 18 |  | 18q21.2       | 49867158  | 51062269  | 0.0327 | 0.1533 | -0.4371 | 4  | 10 | 0   |
| UPP2         | 2  |  | 2q24.1        | 158851711 | 158992666 | 0.0328 | 0.1533 | -0.4369 | 4  | 4  | 0   |
| ZNF214       | 11 |  | 11p15.4       | 7020549   | 7041586   | 0.0329 | 0.1537 | -0.4366 | 2  | 7  | 0   |
| VN1R4        | 19 |  | 19q13.42      | 53770013  | 53770918  | 0.0331 | 0.1546 | -0.4361 | 3  | 5  | 0   |
| ASB6         | 9  |  | 9q34.11       | 132396883 | 132404444 | 0.0334 | 0.1554 | -0.4355 | 3  | 7  | 0   |
| CD164L2      | 1  |  | 1p36.11       | 27705596  | 27709870  | 0.0337 | 0.1561 | -0.4350 | 0  | 9  | 0   |
| AC110080.2-5 | 2  |  | 2p11.2        | 89521177  | 89521912  | 0.0339 | 0.1568 | -0.4345 | 7  | 1  | 0   |
| GPT          | 8  |  | 8q24.3        | 145729465 | 145732554 | 0.0339 | 0.1570 | -0.4344 | 16 | 1  | 0   |
| POU1F1       | 3  |  | 3p11.2        | 87308783  | 87325737  | 0.0343 | 0.1582 | -0.4335 | 5  | 2  | 0   |
| WDR88        | 19 |  | 19q13.11      | 33622998  | 33666705  | 0.0344 | 0.1582 | -0.4334 | 3  | 1  | 0   |
| SCN2A2       | 2  |  | 2q24.3        | 166095912 | 166248818 | 0.0344 | 0.1585 | -0.4332 | 5  | 4  | 0   |
| PRR7         | 5  |  | 5q35.3        | 176873794 | 176883283 | 0.0345 | 0.1585 | -0.4332 | 4  | 6  | 0   |
| AC010243.7   | 5  |  | 5q14.3        | 87514708  | 87515080  | 0.0346 | 0.1588 | -0.4330 | 1  | 12 | 0   |
| DTX4         | 11 |  | 11q12.1       | 58939812  | 58976060  | 0.0346 | 0.1589 | -0.4330 | 7  | 1  | 0   |
| GYPE         | 4  |  | 4q31.21       | 144792020 | 144826716 | 0.0347 | 0.1591 | -0.4328 | 4  | 6  | 1   |
| TAS2R13      | 12 |  | 12p13.2       | 11060525  | 11062161  | 0.0348 | 0.1593 | -0.4326 | 7  | 5  | 0   |
| LILRA4       | 19 |  | 19q13.42      | 54820182  | 54850421  | 0.0350 | 0.1601 | -0.4320 | 3  | 5  | 0   |
| ACPT         | 19 |  | 19q13.33      | 51293672  | 51298481  | 0.0352 | 0.1606 | -0.4316 | 3  | 5  | 0   |
| DGKI         | 7  |  | 7q33          | 137073563 | 137531838 | 0.0352 | 0.1607 | -0.4316 | 13 | 0  | 1   |
| VN1R1        | 19 |  | 19q13.43      | 57966542  | 57967854  | 0.0354 | 0.1610 | -0.4313 | 2  | 6  | 0   |
| NKD2         | 5  |  | 5p15.33       | 100077    | 1038925   | 0.0357 | 0.1617 | -0.4306 | 10 | 4  | 0   |
| PKD1         | 16 |  | 16p13.3       | 2138711   | 2185899   | 0.0358 | 0.1623 | -0.4303 | 5  | 4  | 0   |
| AL356155.10  | 10 |  | 10q24.1       | 97733786  | 97792432  | 0.0359 | 0.1623 | -0.4302 | 2  | 10 | 0   |
| KRT20        | 17 |  | 17q21.2       | 39032195  | 39041479  | 0.0361 | 0.1631 | -0.4297 | 3  | 10 | 0   |
| FUT3         | 19 |  | 19p13.3       | 5842900   | 5851485   | 0.0363 | 0.1636 | -0.4293 | 0  | 6  | 0   |
| LSM11        | 5  |  | 5q33.3        | 157170759 | 157184173 | 0.0365 | 0.1642 | -0.4288 | 0  | 14 | 0   |
| AL109837.22  | 20 |  | 20p12.2       | 11589083  | 11589698  | 0.0366 | 0.1643 | -0.4288 | 3  | 7  | 1   |
| CLECTA       | 12 |  | 12p13.2       | 10269402  | 10282868  | 0.0367 | 0.1646 | -0.4286 | 9  | 3  | 0   |
| KLRC3        | 12 |  | 12p13.2       | 10564921  | 10573194  | 0.0368 | 0.1652 | -0.4282 | 7  | 4  | 0   |
| KIAA1530     | 4  |  | 4p16.3        | 1341054   | 1381837   | 0.0370 | 0.1657 | -0.4280 | 2  | 9  | 0   |
| SRGN         | 10 |  | 10q22.1       | 70847828  | 70864565  | 0.0371 | 0.1660 | -0.4277 | 3  | 3  | 0   |
| ADRB3        | 8  |  | 8p11.23       | 37820516  | 37824184  | 0.0371 | 0.1660 | -0.4277 | 5  | 4  | 0   |
| CHRNA3       | 15 |  | 15q25.1       | 78885453  | 78913322  | 0.0377 | 0.1681 | -0.4264 | 5  | 6  | 0   |
| CRHR2        | 7  |  | 7p14.3        | 30692863  | 30739679  | 0.0378 | 0.1682 | -0.4264 | 4  | 9  | 0   |
| AC104440.1   | 3  |  | 3p14.1        | 66687573  | 66687835  | 0.0379 | 0.1686 | -0.4260 | 1  | 11 | 0   |
| SYT3         | 19 |  | 19q13.33      | 51125236  | 51141302  | 0.0380 | 0.1687 | -0.4259 | 3  | 5  | 0   |
| SLC26A8      | 6  |  | 6p21.31       | 35911295  | 35992377  | 0.0380 | 0.1689 | -0.4258 | 11 | 0  | 0   |
| CRNN         | 1  |  | 1q21.3        | 152381719 | 152386750 | 0.0381 | 0.1691 | -0.4257 | 17 | 1  | 1   |
| HOXB13       | 17 |  | 17q21.32      | 46802133  | 46806120  | 0.0384 | 0.1701 | -0.4251 | 1  | 7  | 0   |
| KIAA1797     | 9  |  | 9p21.3        | 20658308  | 20995954  | 0.0387 | 0.1710 | -0.4245 | 3  | 9  | 0   |
| PRDX5        | 11 |  | 11q13.1       | 64085569  | 64089282  | 0.0388 | 0.1711 | -0.4243 | 5  | 3  | 0   |
| AGRN         | 1  |  | 1p36.33       | 955503    | 991496    | 0.0390 | 0.1716 | -0.4239 | 1  | 3  | 0   |
| PROP1        | 5  |  | 5q35.3        | 177419236 | 177423243 | 0.0390 | 0.1716 | -0.4238 | 5  | 5  | 0   |
| CBFA2T3      | 16 |  | 16q24.3       | 88941267  | 89043401  | 0.0392 | 0.1720 | -0.4235 | 2  | 9  | 0   |
| NR5A1        | 9  |  | 9q33.3        | 127243515 | 127269699 | 0.0395 | 0.1729 | -0.4229 | 1  | 7  | 0   |
| SOCS3        | 17 |  | 17q25.3       | 76352864  | 76356158  | 0.0396 | 0.1731 | -0.4227 | 11 | 4  | 0   |
| RP6-186E3.1  | 23 |  | 23p11.4       | 40218436  | 40219882  | 0.0399 | 0.1739 | -0.4220 | 2  | 11 | 0   |
| KCNF4        | 2  |  | 2q36.1        | 223918862 | 223920353 | 0.0401 | 0.1744 | -0.4217 | 1  | 6  | 0   |
| ZNF213       | 16 |  | 16p13.3       | 3185857   | 3182804   | 0.0402 | 0.1745 | -0.4216 | 2  | 3  | 0   |
| CDI1         | 23 |  | 23q28         | 153665259 | 153671812 | 0.0404 | 0.1752 | -0.4212 | 6  | 10 | 0   |
| KRTAP9-1     | 17 |  | 17q21.2       | 39346100  | 39412616  | 0.0405 | 0.1753 | -0.4210 | 3  | 10 | 0   |
| PFEF2        | 4  |  | 4q21.1        | 76781028  | 76823681  | 0.0405 | 0.1753 | -0.4210 | 3  | 3  | 0   |
| TBXAS1       | 7  |  | 7q34          | 139478047 | 139720125 | 0.0407 | 0.1759 | -0.4206 | 11 | 0  | 1   |
| OR5A21P      | 11 |  | 11q12.1       | 57684771  | 57685702  | 0.0407 | 0.1759 | -0.4205 | 6  | 1  | 0   |
| GPR81        | 12 |  | 12q24.31      | 123104824 | 123215390 | 0.0407 | 0.1759 | -0.4205 | 2  | 6  | 0   |
| AP003774.4   | 11 |  | 11q13.1       | 64216544  | 64219126  | 0.0408 | 0.1760 | -0.4204 | 6  | 3  | 0   |
| AC136428.3-1 | 16 |  | 16p11.2       | 33525824  | 33548081  | 0.0411 | 0.1768 | -0.4199 | 3  | 4  | 0   |
| GDF15        | 19 |  | 19p13.11      | 18496968  | 18499986  | 0.0412 | 0.1770 | -0.4197 | 4  | 3  | 0   |
| LZTR1        | 22 |  | 22q11.21      | 21336558  | 21353325  | 0.0413 | 0.1773 | -0.4195 | 1  | 10 | 0   |
| ZNF185       | 23 |  | 23q28         | 152082997 | 152142025 | 0.0414 | 0.1775 | -0.4193 | 6  | 10 | 0   |
| CYP8B1       | 3  |  | 3p22.1        | 42897497  | 42917633  | 0.0416 | 0.1781 | -0.4189 | 3  | 8  | 0   |
| UBXN6        | 19 |  | 19p13.3       | 4445009   | 4457694   | 0.0416 | 0.1781 | -0.4189 | 0  | 6  | 0   |
| DNAJC5G      | 2  |  | 2p23.3        | 27498289  | 27504367  | 0.0421 | 0.1796 | -0.4180 | 5  | 1  | 0   |
| KIA0892      | 19 |  | 19p13.11      | 19431630  | 19469563  | 0.0428 | 0.1816 | -0.4166 | 4  | 3  | 0   |
| OR2A1J1      | 1  |  | 1q44          | 248097071 | 248098057 | 0.0429 | 0.1817 | -0.4166 | 17 | 0  | 0   |
| MUM1         | 19 |  | 19p13.3       | 1285892   | 1378430   | 0.0432 | 0.1823 | -0.4160 | 2  | 6  | 0   |
| SPC24        | 19 |  | 19p13.2       | 11256170  | 11266484  | 0.0432 | 0.1823 | -0.4160 | 2  | 4  | 0   |
| DNAJB13      | 11 |  | 11q13.4       | 73661364  | 73681332  | 0.0433 | 0.1825 | -0.4158 | 3  | 2  | 0   |
| ZNF711       | 23 |  | 23q21.1       | 84498997  | 84528368  | 0.0434 | 0.1825 | -0.4157 | 3  | 9  | 0   |
| AC005551.1   | 19 |  | 19p13.3       | 3474405   | 3480540   | 0.0435 | 0.1829 | -0.4155 | 0  | 6  | 0   |
| ZNF385B      | 2  |  | 2q31.2-q31.3  | 180306709 | 180726232 | 0.0435 | 0.1829 | -0.4155 | 5  | 3  | 0   |
| HDAC6        | 23 |  | 23p11.23      | 48659784  | 48683386  | 0.0445 | 0.1854 | -0.4137 | 2  | 13 | 0</ |

Supplementary Table 6  
Page 3

|              |    |               |           |           |        |        |        |    |    |   |
|--------------|----|---------------|-----------|-----------|--------|--------|--------|----|----|---|
| CPSF2        | 14 | 14q32.12      | 92588329  | 92630543  | 0.0492 | 0.1981 | 0.4057 | 2  | 9  | 0 |
| TRAPPC9      | 8  | 8q24.3        | 140742588 | 141468678 | 0.0492 | 0.1980 | 0.4057 | 17 | 2  | 0 |
| CANT1        | 17 | 17q25.3       | 76987799  | 77005838  | 0.0491 | 0.1980 | 0.4058 | 11 | 4  | 0 |
| C6orf165     | 6  | 6q15          | 88117721  | 88174182  | 0.0491 | 0.1977 | 0.4059 | 7  | 2  | 0 |
| TMEM159      | 16 | 16p12.3       | 21169698  | 21191937  | 0.0491 | 0.1977 | 0.4059 | 1  | 4  | 0 |
| FBXO32       | 8  | 8q24.13       | 124515359 | 124553446 | 0.0491 | 0.1977 | 0.4059 | 17 | 0  | 1 |
| RNF115       | 1  | 1q21.1        | 145611036 | 145688776 | 0.0490 | 0.1977 | 0.4059 | 16 | 1  | 0 |
| FLNB         | 3  | 3p14.3        | 57994127  | 58157978  | 0.0490 | 0.1977 | 0.4060 | 0  | 11 | 0 |
| FAM178A      | 10 | 10q24.31      | 102672326 | 102724889 | 0.0490 | 0.1976 | 0.4060 | 0  | 9  | 0 |
| C1QTNF3      | 5  | 5p13.2        | 33987279  | 34124633  | 0.0490 | 0.1975 | 0.4061 | 7  | 5  | 0 |
| DGUOK        | 2  | 2p13.1        | 74153953  | 74186088  | 0.0490 | 0.1975 | 0.4061 | 3  | 1  | 0 |
| SEC14L2      | 22 | 22q12.2       | 30792930  | 30825041  | 0.0490 | 0.1975 | 0.4061 | 2  | 7  | 0 |
| ZNF193       | 6  | 6p22.1        | 28193070  | 28201260  | 0.0490 | 0.1975 | 0.4061 | 8  | 0  | 0 |
| MAD2L1       | 4  | 4q27          | 120980581 | 120988013 | 0.0490 | 0.1975 | 0.4061 | 3  | 3  | 0 |
| LGALS1       | 22 | 22q13.1       | 38071613  | 38075809  | 0.0489 | 0.1975 | 0.4061 | 1  | 7  | 0 |
| OPLAH        | 8  | 8q24.3        | 145106168 | 145115606 | 0.0489 | 0.1974 | 0.4062 | 14 | 1  | 0 |
| TAf5         | 10 | 10q24.33      | 105127724 | 105148818 | 0.0489 | 0.1973 | 0.4062 | 0  | 7  | 0 |
| CLK4         | 5  | 5q35.3        | 178029666 | 178054054 | 0.0489 | 0.1973 | 0.4063 | 5  | 4  | 0 |
| SNAP29       | 22 | 22q11.21      | 21213292  | 21245499  | 0.0488 | 0.1973 | 0.4063 | 1  | 10 | 0 |
| PPP1R7       | 2  | 2q37.3        | 242088991 | 242123067 | 0.0488 | 0.1973 | 0.4063 | 5  | 7  | 0 |
| ATP5G2       | 12 | 12q13.13      | 54058945  | 54070512  | 0.0488 | 0.1972 | 0.4063 | 0  | 11 | 0 |
| ABHD8        | 19 | 19p13.11      | 17402941  | 17414282  | 0.0488 | 0.1972 | 0.4064 | 3  | 3  | 0 |
| ARL11        | 13 | 13q14.2       | 50202435  | 50208008  | 0.0488 | 0.1971 | 0.4064 | 2  | 6  | 0 |
| SLC9A4       | 2  | 2q12.1        | 103089762 | 103150430 | 0.0487 | 0.1971 | 0.4064 | 5  | 5  | 1 |
| MAPK9        | 5  | 5q35.3        | 179660594 | 179719071 | 0.0487 | 0.1971 | 0.4064 | 5  | 4  | 0 |
| AC023868.2   | 4  | 4q25          | 113460492 | 113509022 | 0.0487 | 0.1971 | 0.4065 | 2  | 4  | 0 |
| GMEB1        | 1  | 1p35.3        | 28995244  | 29045865  | 0.0487 | 0.1971 | 0.4065 | 0  | 9  | 0 |
| TACC1        | 8  | 8p11.22       | 38586102  | 387110546 | 0.0487 | 0.1971 | 0.4065 | 6  | 4  | 1 |
| AP01453.6-1  | 11 | 11q13.1       | 64084167  | 64085033  | 0.0487 | 0.1970 | 0.4065 | 5  | 3  | 0 |
| MGAT2        | 14 | 14q21.3       | 50087489  | 50090198  | 0.0487 | 0.1970 | 0.4065 | 4  | 7  | 0 |
| ACAD9        | 3  | 3q21.3        | 128598333 | 128631956 | 0.0487 | 0.1970 | 0.4066 | 7  | 2  | 0 |
| EEF1D        | 8  | 8q24.3        | 144661898 | 144679845 | 0.0487 | 0.1970 | 0.4066 | 14 | 1  | 0 |
| TNPO2        | 19 | 19p13.2       | 12810008  | 12834810  | 0.0487 | 0.1970 | 0.4066 | 4  | 4  | 0 |
| GOLGA1       | 9  | 9q33.3        | 127640576 | 127710292 | 0.0486 | 0.1970 | 0.4066 | 1  | 7  | 0 |
| SLP1         | 20 | 20q13.12      | 43880879  | 43883206  | 0.0486 | 0.1969 | 0.4066 | 5  | 7  | 0 |
| ZNF395       | 8  | 8p21.1        | 28203104  | 28243977  | 0.0486 | 0.1969 | 0.4067 | 1  | 13 | 0 |
| RNASEN       | 5  | 5p13.3        | 31400609  | 31529213  | 0.0486 | 0.1969 | 0.4067 | 9  | 4  | 0 |
| NOL12        | 22 | 22q13.1       | 38082330  | 38170137  | 0.0486 | 0.1969 | 0.4067 | 1  | 7  | 0 |
| RANBP10      | 16 | 16q22.1       | 67757005  | 67840555  | 0.0486 | 0.1969 | 0.4067 | 6  | 7  | 0 |
| SMAP2        | 1  | 1p34.2        | 40810522  | 40888998  | 0.0485 | 0.1968 | 0.4068 | 2  | 3  | 0 |
| LUC7L        | 16 | 16p13.3       | 238968    | 279462    | 0.0485 | 0.1968 | 0.4068 | 4  | 3  | 0 |
| TM9SF3       | 10 | 10q24.1       | 98277867  | 98347209  | 0.0485 | 0.1966 | 0.4069 | 2  | 9  | 0 |
| UBR5         | 8  | 8q22.3        | 103265572 | 103424495 | 0.0484 | 0.1966 | 0.4069 | 19 | 0  | 2 |
| GPSM2        | 1  | 1p13.3        | 109417972 | 109473044 | 0.0484 | 0.1965 | 0.4070 | 4  | 4  | 0 |
| ZNF114       | 19 | 19q13.33      | 48774654  | 48790863  | 0.0484 | 0.1965 | 0.4070 | 3  | 9  | 0 |
| TMEM11       | 17 | 17p11.2       | 21101263  | 21117908  | 0.0484 | 0.1965 | 0.4070 | 1  | 12 | 0 |
| SCAP         | 3  | 3p21.31       | 47455184  | 47518616  | 0.0484 | 0.1964 | 0.4071 | 0  | 8  | 0 |
| SCRN1        | 7  | 7p14.3        | 29959720  | 30029905  | 0.0483 | 0.1964 | 0.4071 | 4  | 7  | 0 |
| MLXIP        | 12 | 12q24.31      | 122516652 | 122628963 | 0.0483 | 0.1961 | 0.4072 | 2  | 6  | 0 |
| ZNF576       | 19 | 19q13.31      | 44100544  | 44105309  | 0.0482 | 0.1959 | 0.4073 | 3  | 7  | 0 |
| MIA3         | 1  | 1q41          | 222791444 | 222856105 | 0.0480 | 0.1953 | 0.4076 | 17 | 1  | 1 |
| OR51A2       | 11 | 11p15.4       | 4976002   | 4976943   | 0.0480 | 0.1952 | 0.4077 | 3  | 6  | 0 |
| RNF160       | 21 | 21q21.3       | 30300466  | 30365270  | 0.0480 | 0.1952 | 0.4077 | 7  | 3  | 0 |
| IL11RA       | 9  | 9p13.3        | 34652182  | 34661883  | 0.0480 | 0.1952 | 0.4077 | 5  | 9  | 0 |
| XOFRD2       | 22 | 22q12.3       | 36883234  | 36903148  | 0.0480 | 0.1952 | 0.4077 | 3  | 7  | 0 |
| FAM114A2     | 5  | 5q33.2        | 153371271 | 153418497 | 0.0480 | 0.1952 | 0.4077 | 0  | 14 | 0 |
| ASB4         | 7  | 7q21.3        | 95115213  | 95167071  | 0.0479 | 0.1951 | 0.4078 | 8  | 0  | 0 |
| RYR1         | 19 | 19q13.2       | 38924340  | 39078204  | 0.0478 | 0.1951 | 0.4078 | 4  | 6  | 0 |
| UBA5         | 3  | 3q22.1        | 132373290 | 132396941 | 0.0479 | 0.1949 | 0.4079 | 7  | 0  | 0 |
| INTS1        | 7  | 7p22.3        | 1509813   | 1545489   | 0.0478 | 0.1947 | 0.4080 | 5  | 8  | 0 |
| PFKM         | 12 | 12q13.11      | 48501157  | 48539887  | 0.0478 | 0.1947 | 0.4080 | 2  | 9  | 0 |
| ZNF777       | 7  | 7q36.1        | 149128461 | 149158053 | 0.0478 | 0.1947 | 0.4080 | 11 | 1  | 0 |
| DNAJC13      | 3  | 3q22.1        | 132136504 | 132257880 | 0.0477 | 0.1945 | 0.4081 | 7  | 0  | 0 |
| TRIP13       | 5  | 5p15.33       | 893004    | 918156    | 0.0476 | 0.1942 | 0.4083 | 10 | 4  | 0 |
| ACAP1        | 17 | 17p13.1       | 7239848   | 7254793   | 0.0476 | 0.1942 | 0.4083 | 0  | 11 | 0 |
| PLS1         | 3  | 3q23          | 142315229 | 142432501 | 0.0476 | 0.1941 | 0.4083 | 11 | 0  | 0 |
| REPIN1       | 7  | 7q36.1        | 150065879 | 150071133 | 0.0476 | 0.1941 | 0.4083 | 12 | 1  | 0 |
| MINPP1       | 10 | 10q23.2       | 89264223  | 89313168  | 0.0475 | 0.1939 | 0.4085 | 5  | 5  | 0 |
| WFD6C        | 20 | 20q13.12      | 44162836  | 44176391  | 0.0475 | 0.1939 | 0.4085 | 5  | 7  | 0 |
| CD1E         | 1  | 1q23.1        | 158323254 | 158327343 | 0.0475 | 0.1939 | 0.4085 | 17 | 0  | 1 |
| CCNY         | 10 | 10p11.21      | 35535953  | 35860852  | 0.0475 | 0.1939 | 0.4085 | 11 | 1  | 0 |
| ITPR3        | 6  | 6p21.31       | 33589161  | 33664346  | 0.0474 | 0.1935 | 0.4087 | 9  | 2  | 0 |
| ANAPC5       | 12 | 12q24.31      | 121746048 | 121790265 | 0.0473 | 0.1933 | 0.4088 | 2  | 6  | 0 |
| TIMP1        | 23 | 23p11.23      | 47441690  | 47446188  | 0.0473 | 0.1933 | 0.4088 | 2  | 13 | 0 |
| GTf2F1       | 19 | 19p13.3       | 6379580   | 6393291   | 0.0473 | 0.1932 | 0.4088 | 0  | 6  | 0 |
| ANO10        | 3  | 3p22.1-p21.33 | 43407819  | 43733086  | 0.0473 | 0.1932 | 0.4089 | 1  | 9  | 0 |
| FAM184A      | 6  | 6q22.31       | 119280998 | 119470358 | 0.0473 | 0.1932 | 0.4089 | 7  | 1  | 1 |
| MT1F         | 16 | 16q12.2       | 56691855  | 56693214  | 0.0472 | 0.1932 | 0.4089 | 3  | 9  | 0 |
| BCAR1        | 16 | 16q23.1       | 75262928  | 75301951  | 0.0472 | 0.1932 | 0.4089 | 2  | 8  | 0 |
| SH3BGL3      | 1  | 1p36.11       | 26606213  | 26608012  | 0.0470 | 0.1925 | 0.4093 | 0  | 11 | 0 |
| FIS1         | 7  | 7q22.1        | 100882739 | 100895414 | 0.0470 | 0.1925 | 0.4093 | 3  | 4  | 0 |
| PEX1         | 7  | 7q21.2        | 92116334  | 92157845  | 0.0470 | 0.1923 | 0.4094 | 9  | 0  | 1 |
| HEXIM1       | 17 | 17q21.31      | 43224684  | 43229468  | 0.0469 | 0.1922 | 0.4094 | 2  | 10 | 0 |
| EZF8         | 11 | 11p15.1       | 19245618  | 19263389  | 0.0469 | 0.1922 | 0.4095 | 4  | 5  | 0 |
| CTAG5        | 14 | 14q21.1       | 39734476  | 39832037  | 0.0469 | 0.1921 | 0.4095 | 2  | 6  | 0 |
| PPRC1        | 10 | 10q24.32      | 103892787 | 103910088 | 0.0469 | 0.1921 | 0.4095 | 0  | 8  | 0 |
| BTN3A2       | 6  | 6q22.2        | 26365398  | 26378548  | 0.0469 | 0.1921 | 0.4095 | 8  | 0  | 0 |
| TRAF6        | 11 | 11p12         | 36510723  | 36531822  | 0.0468 | 0.1919 | 0.4096 | 5  | 2  | 0 |
| DIP2B        | 12 | 12q13.12      | 50898768  | 51142450  | 0.0468 | 0.1919 | 0.4096 | 0  | 8  | 0 |
| THRA         | 17 | 17q21.1       | 38219063  | 38250118  | 0.0468 | 0.1919 | 0.4097 | 2  | 10 | 0 |
| DNAJC5       | 20 | 20q13.33      | 62526518  | 62565394  | 0.0468 | 0.1918 | 0.4097 | 8  | 6  | 0 |
| ACTR5        | 20 | 20q11.23      | 37377097  | 37401089  | 0.0467 | 0.1917 | 0.4098 | 1  | 8  | 0 |
| C14orf156    | 14 | 14q24.3       | 78174425  | 78183937  | 0.0467 | 0.1915 | 0.4099 | 1  | 11 | 0 |
| ZDHC18       | 1  | 1p36.11       | 27153201  | 27182207  | 0.0467 | 0.1914 | 0.4099 | 0  | 11 | 0 |
| RNF168       | 3  | 3q29          | 196198629 | 196230582 | 0.0466 | 0.1913 | 0.4100 | 11 | 1  | 0 |
| C1orf83      | 1  | 1p32.3        | 54519274  | 54565416  | 0.0466 | 0.1913 | 0.4100 | 6  | 7  | 0 |
| PTHR2        | 2  | 2q34          | 209224438 | 209704824 | 0.0466 | 0.1912 | 0.4100 | 2  | 3  | 0 |
| C1orf107     | 1  | 1q32.2        | 210001333 | 210030908 | 0.0466 | 0.1911 | 0.4101 | 17 | 3  | 0 |
| DFNA5        | 7  | 7p15.3        | 24737974  | 24797639  | 0.0466 | 0.1911 | 0.4101 | 4  | 7  | 0 |
| MPHOSPH10    | 2  | 2p13.3        | 71357444  | 71377230  | 0.0465 | 0.1911 | 0.4101 | 5  | 1  | 0 |
| IQGAP1       | 15 | 15q26.1       | 90931473  | 91045475  | 0.0465 | 0.1911 | 0.4102 | 7  | 3  | 0 |
| PPP2R1B      | 11 | 11q23.1       | 111597632 | 111637169 | 0.0465 | 0.1909 | 0.4102 | 5  | 2  | 0 |
| AC020629.6-2 | 12 | 12q12         | 42680713  | 42682362  | 0.0465 | 0.1909 | 0.4102 | 4  | 6  | 0 |
| C1orf124     | 1  | 1q42.2        | 231473682 | 231489988 | 0.0465 | 0.1909 | 0.4103 | 21 | 0  | 1 |
| LRRC16B      | 14 | 14q11.2       | 24521206  | 24538916  | 0.0464 | 0.1908 | 0.4104 | 3  | 4  | 0 |
| TSC22D2      | 3  | 3q25.1        | 150126122 | 150177613 | 0.0464 | 0.1908 | 0.4104 | 14 | 1  | 0 |
| RLF          | 1  | 1p34.2        | 40627041  | 40706592  | 0.0464 | 0.1908 | 0.4104 | 3  | 3  | 0 |
| KIAA1191     | 5  | 5q35.2        | 175773068 | 175788809 | 0.0464 | 0.1908 | 0.4104 | 4  | 8  | 0 |
| ARHGEF12     | 11 | 11q23.3       | 120207946 | 120360645 | 0.0464 | 0.1907 | 0.4104 | 5  | 6  | 1 |
| C12orf29     | 12 | 12q21.32      | 88429268  | 88443936  | 0.0463 | 0.1907 | 0.4105 | 1  | 8  | 0 |
| DBN1         | 5  | 5q35.3        | 176883614 | 17690694  | 0.0463 | 0.1907 | 0.4105 | 4  | 6  | 0 |
| PSME3        | 17 | 17q21.31      | 40985423  | 40995775  | 0.0463 | 0.1905 | 0.4106 | 1  | 11 | 0 |
| HSP44        | 5  | 5q31.1        | 132387662 | 132440709 | 0.0463 | 0.1905 | 0.4106 | 2  | 14 | 0 |
| NPR2         | 9  | 9p13.3        | 3579      |           |        |        |        |    |    |   |

Supplementary Table 6  
Page 4

|            |    |                 |           |           |        |        |        |    |    |   |
|------------|----|-----------------|-----------|-----------|--------|--------|--------|----|----|---|
| AKAP11     | 13 | 13q14.11        | 42846289  | 42897402  | 0.0442 | 0.1847 | 0.4141 | 2  | 7  | 0 |
| ADAMTS3    | 4  | 4q13.3          | 73146687  | 73434516  | 0.0442 | 0.1845 | 0.4142 | 5  | 3  | 0 |
| LOH12CR1   | 12 | 12p13.2         | 12510020  | 12619838  | 0.0442 | 0.1845 | 0.4142 | 7  | 5  | 0 |
| SUZ12      | 17 | 17q11.2         | 30264044  | 30328057  | 0.0442 | 0.1844 | 0.4143 | 0  | 7  | 0 |
| NUBPL      | 14 | 14q12           | 32030591  | 32330399  | 0.0442 | 0.1844 | 0.4143 | 4  | 4  | 0 |
| SENP3      | 17 | 17p13.1         | 7465319   | 7475285   | 0.0441 | 0.1844 | 0.4143 | 0  | 11 | 0 |
| SCYL1      | 11 | 11q13.1         | 65292548  | 65306182  | 0.0441 | 0.1844 | 0.4143 | 5  | 1  | 0 |
| TBC1D15    | 12 | 12q21.1         | 72233539  | 72318097  | 0.0441 | 0.1843 | 0.4144 | 2  | 8  | 0 |
| FNDC3A     | 13 | 13q14.2         | 49550048  | 49783914  | 0.0441 | 0.1843 | 0.4144 | 2  | 7  | 0 |
| C10orf137  | 10 | 10q26.13        | 127408084 | 127452712 | 0.0441 | 0.1843 | 0.4144 | 4  | 9  | 0 |
| MAGI3      | 1  | 1p13.2          | 113933475 | 114228545 | 0.0441 | 0.1843 | 0.4144 | 5  | 5  | 0 |
| LYAR       | 4  | 4p16.3          | 4269431   | 4291873   | 0.0441 | 0.1843 | 0.4144 | 0  | 11 | 0 |
| MMRN1      | 4  | 4q22.1          | 90800683  | 90875780  | 0.0440 | 0.1842 | 0.4145 | 3  | 4  | 0 |
| SLC19A2    | 1  | 1q24.2          | 169433170 | 169455241 | 0.0440 | 0.1842 | 0.4145 | 17 | 1  | 1 |
| DNAJC14    | 12 | 12q13.2         | 56214744  | 56223420  | 0.0439 | 0.1838 | 0.4147 | 1  | 7  | 0 |
| FAM128A    | 2  | 2q21.1          | 132222473 | 132250305 | 0.0439 | 0.1838 | 0.4147 | 3  | 7  | 0 |
| BPNT1      | 1  | 1q41            | 220230824 | 220263191 | 0.0439 | 0.1838 | 0.4147 | 15 | 1  | 1 |
| MON1A      | 3  | 3p21.31         | 49946305  | 49967606  | 0.0439 | 0.1837 | 0.4148 | 0  | 9  | 0 |
| UBTD2      | 5  | 5q35.1          | 171636650 | 171710795 | 0.0439 | 0.1837 | 0.4148 | 2  | 11 | 0 |
| ANKRD34B   | 5  | 5q14.1          | 79852575  | 79866098  | 0.0439 | 0.1837 | 0.4148 | 0  | 14 | 0 |
| C6orf66    | 6  | 6p16.1          | 97338140  | 97345767  | 0.0439 | 0.1837 | 0.4148 | 8  | 5  | 0 |
| ACSL4      | 23 | 23q23           | 108884566 | 108976621 | 0.0438 | 0.1837 | 0.4148 | 1  | 13 | 0 |
| SEC22C     | 3  | 3p22.1          | 42589461  | 42642572  | 0.0438 | 0.1837 | 0.4149 | 3  | 7  | 0 |
| PASK       | 2  | 2q37.3          | 242045515 | 242089679 | 0.0438 | 0.1837 | 0.4149 | 5  | 7  | 0 |
| OSTM1      | 6  | 6q21            | 108362613 | 108487044 | 0.0438 | 0.1835 | 0.4149 | 8  | 2  | 0 |
| WASF1      | 6  | 6q21            | 110421022 | 110501207 | 0.0438 | 0.1835 | 0.4149 | 7  | 2  | 0 |
| CD44       | 11 | 11p13           | 35160417  | 35253946  | 0.0438 | 0.1835 | 0.4150 | 5  | 2  | 0 |
| TOP3A      | 17 | 17p11.2         | 18174742  | 18218321  | 0.0438 | 0.1835 | 0.4150 | 2  | 11 | 0 |
| MPHOSPH8   | 13 | 13q12.11        | 20207880  | 20246638  | 0.0437 | 0.1833 | 0.4151 | 1  | 2  | 0 |
| SUPT3H     | 6  | 6p21.1          | 44796469  | 45345691  | 0.0437 | 0.1833 | 0.4151 | 10 | 1  | 0 |
| MOSC1      | 1  | 1q41            | 220960039 | 220987738 | 0.0437 | 0.1833 | 0.4151 | 17 | 1  | 1 |
| ARLAC      | 2  | 2q37.1          | 235401685 | 235405697 | 0.0437 | 0.1833 | 0.4151 | 2  | 10 | 0 |
| FANCD2     | 3  | 3p25.3          | 10068113  | 10143614  | 0.0437 | 0.1833 | 0.4151 | 6  | 2  | 0 |
| SHROOM1    | 5  | 5q31.1          | 132157835 | 132166590 | 0.0436 | 0.1832 | 0.4152 | 2  | 16 | 0 |
| RNF138     | 18 | 18q12.1         | 29671837  | 29711523  | 0.0436 | 0.1830 | 0.4153 | 11 | 4  | 0 |
| HLTF       | 3  | 3q24            | 148747904 | 148804341 | 0.0436 | 0.1830 | 0.4153 | 15 | 1  | 0 |
| BAG4       | 8  | 8p11.23         | 38034312  | 38070809  | 0.0436 | 0.1830 | 0.4153 | 5  | 4  | 0 |
| SLC2A13    | 12 | 12q12           | 40148825  | 40498891  | 0.0435 | 0.1830 | 0.4154 | 4  | 8  | 0 |
| TECPR1     | 7  | 7q21.3          | 97846057  | 97881518  | 0.0435 | 0.1829 | 0.4154 | 3  | 2  | 0 |
| CDK2       | 12 | 12q13.2         | 56360556  | 56366565  | 0.0435 | 0.1829 | 0.4154 | 1  | 7  | 0 |
| PPP3CC     | 8  | 8p21.3          | 22298596  | 22398635  | 0.0435 | 0.1829 | 0.4154 | 0  | 13 | 0 |
| GLOD4      | 17 | 17p13.3         | 662550    | 668505    | 0.0435 | 0.1829 | 0.4154 | 0  | 10 | 0 |
| GPRC5A     | 12 | 12p13.1         | 13043956  | 13066598  | 0.0435 | 0.1829 | 0.4155 | 7  | 5  | 0 |
| NUP62      | 19 | 19q13.33        | 50410086  | 50432786  | 0.0435 | 0.1829 | 0.4155 | 3  | 6  | 0 |
| POLDIP3    | 22 | 22q13.2         | 42979727  | 43010962  | 0.0435 | 0.1829 | 0.4155 | 2  | 6  | 0 |
| BLCAP      | 20 | 20q11.23        | 36145819  | 36156303  | 0.0434 | 0.1827 | 0.4156 | 1  | 8  | 0 |
| PTPN6      | 12 | 12p13.31        | 7055740   | 7070479   | 0.0434 | 0.1826 | 0.4157 | 10 | 3  | 0 |
| TMPRSS3    | 21 | 21q22.3         | 43791999  | 43816955  | 0.0433 | 0.1825 | 0.4157 | 5  | 6  | 1 |
| TBL2       | 7  | 7q11.23         | 72983279  | 72993013  | 0.0433 | 0.1825 | 0.4157 | 2  | 4  | 0 |
| ABI2       | 2  | 2q33.2          | 204193003 | 204296889 | 0.0433 | 0.1825 | 0.4158 | 2  | 6  | 0 |
| RCOR3      | 1  | 1q32.2          | 211432708 | 211489727 | 0.0433 | 0.1825 | 0.4158 | 17 | 1  | 0 |
| OR8B12     | 11 | 11q24.2         | 124412618 | 124413550 | 0.0433 | 0.1824 | 0.4158 | 4  | 6  | 0 |
| GDAP2      | 1  | 1p12            | 118406108 | 118472302 | 0.0433 | 0.1824 | 0.4159 | 5  | 6  | 0 |
| CHUK       | 10 | 10q24.31        | 101948125 | 101989376 | 0.0432 | 0.1823 | 0.4159 | 1  | 10 | 0 |
| CCL1       | 17 | 17q12           | 32687399  | 32690252  | 0.0432 | 0.1823 | 0.4159 | 5  | 12 | 0 |
| RPA3       | 7  | 7p21.3          | 7676349   | 7758238   | 0.0432 | 0.1823 | 0.4160 | 7  | 2  | 0 |
| C14orf24   | 14 | 14q13.2         | 35514113  | 35552597  | 0.0432 | 0.1823 | 0.4160 | 3  | 4  | 0 |
| TUBGCP4    | 15 | 15q15.3         | 43863293  | 43868938  | 0.0432 | 0.1823 | 0.4160 | 0  | 10 | 0 |
| OSTF1      | 9  | 9q21.13         | 77703390  | 77762110  | 0.0432 | 0.1823 | 0.4160 | 3  | 6  | 0 |
| KISS1      | 1  | 1q32.1          | 204159469 | 204165628 | 0.0432 | 0.1823 | 0.4160 | 15 | 1  | 0 |
| TMEM222    | 1  | 1p36.11         | 27648636  | 27662890  | 0.0432 | 0.1823 | 0.4160 | 0  | 9  | 0 |
| HOXC6      | 12 | 12q13.13        | 54410642  | 54424607  | 0.0432 | 0.1823 | 0.4160 | 1  | 12 | 0 |
| RBM14      | 11 | 11q13.2         | 66384053  | 66433436  | 0.0432 | 0.1823 | 0.4160 | 3  | 1  | 0 |
| PHOSPHO2   | 2  | 2q31.1          | 170550975 | 170558216 | 0.0432 | 0.1823 | 0.4160 | 6  | 4  | 0 |
| ZNFX57     | 19 | 19p13.2         | 7069471   | 7087979   | 0.0432 | 0.1823 | 0.4160 | 0  | 5  | 0 |
| STYX       | 14 | 14q22.1         | 53196883  | 53241703  | 0.0432 | 0.1823 | 0.4161 | 2  | 8  | 0 |
| CCDC132    | 7  | 7q21.3          | 92861653  | 92988337  | 0.0431 | 0.1823 | 0.4161 | 9  | 0  | 1 |
| SLC38A9    | 5  | 5q11.2          | 54921673  | 55008152  | 0.0431 | 0.1823 | 0.4161 | 0  | 12 | 0 |
| PTK2       | 8  | 8q24.3          | 141668501 | 142011332 | 0.0431 | 0.1823 | 0.4161 | 17 | 0  | 1 |
| WDR59      | 16 | 16q23.1         | 74907474  | 75019017  | 0.0431 | 0.1822 | 0.4162 | 2  | 9  | 0 |
| BTRC       | 10 | 10q24.32        | 103113825 | 103317070 | 0.0431 | 0.1822 | 0.4162 | 0  | 9  | 0 |
| CYP19A1    | 15 | 15q21.2         | 51500254  | 51630807  | 0.0430 | 0.1822 | 0.4163 | 1  | 7  | 0 |
| MAEA       | 4  | 4p16.3          | 1283672   | 1333924   | 0.0430 | 0.1821 | 0.4163 | 2  | 9  | 0 |
| ABLIM1     | 10 | 10q25.3         | 116190872 | 116444414 | 0.0430 | 0.1821 | 0.4163 | 5  | 6  | 0 |
| C12orf11   | 12 | 12p11.23        | 27058118  | 27091254  | 0.0430 | 0.1820 | 0.4164 | 7  | 4  | 0 |
| SFRS11     | 1  | 1p31.1          | 70671365  | 70717684  | 0.0430 | 0.1819 | 0.4164 | 6  | 3  | 0 |
| FLAD1      | 1  | 1q21.3          | 154955817 | 154965587 | 0.0429 | 0.1819 | 0.4164 | 18 | 0  | 1 |
| SLC25A3    | 12 | 12q23.1         | 98987403  | 98995775  | 0.0429 | 0.1818 | 0.4165 | 1  | 8  | 0 |
| BLM        | 15 | 15q26.1         | 91260579  | 91358686  | 0.0429 | 0.1818 | 0.4165 | 7  | 3  | 0 |
| DPH5       | 1  | 1p21.2          | 101455185 | 101491362 | 0.0429 | 0.1818 | 0.4165 | 4  | 9  | 0 |
| ROPN1L     | 5  | 5p15.2          | 10442009  | 10465135  | 0.0428 | 0.1816 | 0.4167 | 9  | 6  | 1 |
| GRB10      | 7  | 7p12.1          | 50657760  | 50861159  | 0.0428 | 0.1816 | 0.4167 | 5  | 7  | 0 |
| SFT2D2     | 1  | 1q24.2          | 168195188 | 168212087 | 0.0428 | 0.1815 | 0.4167 | 16 | 1  | 1 |
| DNAJC25    | 9  | 9q13.1          | 114393632 | 114432526 | 0.0427 | 0.1814 | 0.4168 | 2  | 8  | 0 |
| KCTD3      | 1  | 1q41            | 215740735 | 215795147 | 0.0427 | 0.1812 | 0.4169 | 16 | 1  | 1 |
| FERT1L4    | 20 | 20p11.22        | 34146507  | 34195494  | 0.0427 | 0.1812 | 0.4169 | 0  | 13 | 0 |
| OTUD5      | 23 | 23p11.23        | 48779305  | 48815648  | 0.0427 | 0.1811 | 0.4170 | 2  | 6  | 0 |
| CCDC111    | 4  | 4q35.1          | 185570767 | 185616112 | 0.0426 | 0.1809 | 0.4170 | 3  | 9  | 0 |
| PHF20L1    | 8  | 8q24.22         | 133787604 | 133861052 | 0.0426 | 0.1809 | 0.4171 | 19 | 1  | 2 |
| POLR3A     | 10 | 10q22.3         | 79735906  | 79789259  | 0.0426 | 0.1808 | 0.4171 | 4  | 5  | 0 |
| TMEM38B    | 9  | 9q31.2          | 108456825 | 108538893 | 0.0425 | 0.1808 | 0.4172 | 2  | 6  | 0 |
| LAMB4      | 7  | 7q31.1          | 107663993 | 107770801 | 0.0425 | 0.1807 | 0.4172 | 9  | 2  | 0 |
| PIWIL4     | 11 | 11q21           | 94300474  | 94354586  | 0.0425 | 0.1807 | 0.4172 | 6  | 3  | 0 |
| KIF27      | 9  | 9q21.32         | 86451613  | 86536342  | 0.0425 | 0.1806 | 0.4173 | 4  | 6  | 0 |
| SECISBP2   | 9  | 9q22.2          | 91933412  | 91974561  | 0.0425 | 0.1806 | 0.4173 | 4  | 7  | 0 |
| ZCCHC8     | 12 | 12q24.31        | 122957437 | 122985518 | 0.0424 | 0.1805 | 0.4174 | 2  | 6  | 0 |
| UBP1       | 3  | 3p22.3          | 33429831  | 33482079  | 0.0424 | 0.1804 | 0.4174 | 6  | 5  | 0 |
| TCF15      | 20 | 20p13           | 584441    | 590953    | 0.0424 | 0.1804 | 0.4174 | 2  | 6  | 1 |
| ZNFX28     | 19 | 19q13.41-q13.42 | 53300659  | 53686232  | 0.0424 | 0.1803 | 0.4175 | 3  | 5  | 0 |
| NLE1       | 17 | 17q12           | 33458370  | 33469322  | 0.0424 | 0.1803 | 0.4175 | 2  | 11 | 0 |
| KCTD19     | 16 | 16q22.1         | 67323393  | 67360661  | 0.0423 | 0.1802 | 0.4176 | 6  | 7  | 0 |
| SLC25A27   | 6  | 6p12.3          | 46620679  | 46649356  | 0.0423 | 0.1801 | 0.4176 | 12 | 1  | 0 |
| NANP       | 20 | 20p11.21-p11.1  | 25593575  | 25604648  | 0.0423 | 0.1801 | 0.4176 | 0  | 7  | 0 |
| CPSF1      | 8  | 8q24.3          | 145618446 | 145634733 | 0.0423 | 0.1801 | 0.4176 | 15 | 1  | 0 |
| PERP       | 6  | 6q23.3          | 138409643 | 138428660 | 0.0423 | 0.1801 | 0.4176 | 7  | 3  | 1 |
| MAP3K1     | 5  | 5q11.2          | 56110900  | 56191973  | 0.0423 | 0.1801 | 0.4177 | 0  | 15 | 0 |
| NSL1       | 1  | 1q32.3          | 212899495 | 212965139 | 0.0423 | 0.1801 | 0.4177 | 17 | 2  | 0 |
| TPH1       | 12 | 12p13.31        | 6976283   | 6980112   | 0.0422 | 0.1800 | 0.4177 | 11 | 3  | 0 |
| GTSE1      | 22 | 22q13.31        | 46692638  | 46729593  | 0.0422 | 0.1800 | 0.4177 | 5  | 6  | 0 |
| PSMG3      | 7  | 7p22.3          | 1606972   | 1610641   | 0.0422 | 0.1800 | 0.4177 | 5  | 8  | 0 |
| PAPSS1     | 4  | 4q25            | 108534823 | 108641419 | 0.0422 | 0.1800 | 0.4178 | 2  | 4  | 0 |
| KCTD14     | 11 | 11q14.1         | 77725764  | 77734320  | 0.0422 | 0.1799 | 0.4178 | 6  | 2  | 0 |
| NDUFB2     | 7  | 7q34            | 140396443 | 140406442 | 0.0421 | 0.1798 | 0.4180 | 9  | 1  | 0 |
| AC121493.1 | 3  | 3p14.1          | 65342053  | 66023983  | 0.0421 | 0.1795 |        |    |    |   |

Supplementary Table 6  
Page 5

|             |    |           |           |           |        |        |        |    |    |   |
|-------------|----|-----------|-----------|-----------|--------|--------|--------|----|----|---|
| C14orf2     | 14 | 14q32.33  | 104378626 | 104387903 | 0.0405 | 0.1752 | 0.4211 | 1  | 8  | 0 |
| HECTD3      | 1  | 1p34.1    | 45468220  | 45477027  | 0.0404 | 0.1752 | 0.4211 | 3  | 3  | 0 |
| PDZK1IP1    | 1  | 1p33      | 47649261  | 47656716  | 0.0404 | 0.1752 | 0.4211 | 3  | 5  | 0 |
| ZNF823      | 19 | 19p13.2   | 11832081  | 11849824  | 0.0404 | 0.1752 | 0.4212 | 3  | 4  | 0 |
| AC008969.6  | 19 | 19q13.43  | 58513429  | 58518570  | 0.0404 | 0.1752 | 0.4212 | 2  | 6  | 0 |
| AC015688.11 | 17 | 17q11.2   | 25981761  | 25982420  | 0.0404 | 0.1751 | 0.4212 | 3  | 10 | 0 |
| CCDC6       | 10 | 10q21.2   | 61548521  | 61666818  | 0.0404 | 0.1751 | 0.4212 | 3  | 1  | 0 |
| SEC61A2     | 10 | 10p14-p13 | 12171636  | 12211956  | 0.0403 | 0.1749 | 0.4213 | 11 | 2  | 1 |
| MRPS36      | 5  | 5q13.2    | 68513573  | 68541954  | 0.0403 | 0.1749 | 0.4213 | 0  | 12 | 0 |
| VCL         | 10 | 10q22.2   | 75757872  | 75879918  | 0.0403 | 0.1747 | 0.4214 | 2  | 4  | 0 |
| TTN         | 2  | 2q31.2    | 179390716 | 179695529 | 0.0402 | 0.1747 | 0.4215 | 6  | 3  | 0 |
| EPC1        | 10 | 10p11.22  | 32556679  | 32667726  | 0.0402 | 0.1747 | 0.4215 | 10 | 1  | 0 |
| KRT19       | 17 | 17q21.2   | 39679870  | 39684641  | 0.0402 | 0.1745 | 0.4216 | 2  | 10 | 0 |
| LRRC53      | 1  | 1p31.1    | 74935562  | 74978298  | 0.0402 | 0.1745 | 0.4216 | 7  | 4  | 0 |
| TGFB3       | 1  | 1p22.1    | 92145900  | 92371559  | 0.0402 | 0.1745 | 0.4216 | 6  | 8  | 0 |
| MKI67IP     | 2  | 2q14.3    | 122484524 | 122494503 | 0.0401 | 0.1744 | 0.4217 | 2  | 7  | 0 |
| RNASEH1     | 14 | 14q11.2   | 21051054  | 21078043  | 0.0401 | 0.1744 | 0.4217 | 2  | 4  | 0 |
| GCC2        | 2  | 2q12.3    | 109065017 | 109125854 | 0.0401 | 0.1744 | 0.4217 | 4  | 6  | 1 |
| PLAGL1      | 6  | 6q24.2    | 144261437 | 144385735 | 0.0401 | 0.1743 | 0.4218 | 7  | 4  | 1 |
| KIAA0430    | 16 | 16p13.11  | 15688245  | 15737009  | 0.0401 | 0.1743 | 0.4218 | 4  | 2  | 0 |
| FAM40A      | 1  | 1p13.3    | 110574199 | 110597261 | 0.0401 | 0.1743 | 0.4218 | 5  | 7  | 0 |
| ASXL1       | 20 | 20q11.21  | 30946153  | 31027121  | 0.0400 | 0.1742 | 0.4219 | 1  | 3  | 0 |
| ZNF532      | 18 | 18q21.32  | 56530061  | 56653683  | 0.0400 | 0.1741 | 0.4219 | 2  | 8  | 0 |
| PIF4K2C     | 12 | 12q13.3   | 57985073  | 57997198  | 0.0400 | 0.1741 | 0.4219 | 1  | 8  | 0 |
| RPS11P5     | 19 | 19q13.33  | 49999634  | 50002944  | 0.0400 | 0.1740 | 0.4220 | 3  | 6  | 0 |
| C6orf103    | 6  | 6q24.3    | 146920136 | 147136598 | 0.0399 | 0.1739 | 0.4221 | 5  | 6  | 0 |
| NMNAT1      | 1  | 1p36.22   | 10003486  | 10045556  | 0.0399 | 0.1736 | 0.4222 | 0  | 10 | 0 |
| SHROOM3     | 4  | 4q21.1    | 77356253  | 77704403  | 0.0398 | 0.1736 | 0.4222 | 4  | 4  | 0 |
| C9orf119    | 9  | 9q34.1    | 131037718 | 131051268 | 0.0398 | 0.1736 | 0.4222 | 3  | 7  | 0 |
| MED19       | 11 | 11q12.1   | 57471189  | 57479673  | 0.0398 | 0.1736 | 0.4223 | 6  | 2  | 0 |
| CALM1       | 14 | 14q32.11  | 90863373  | 90874610  | 0.0398 | 0.1736 | 0.4223 | 2  | 10 | 0 |
| GALNT1      | 18 | 18q12.2   | 33161003  | 33291794  | 0.0398 | 0.1736 | 0.4223 | 7  | 9  | 0 |
| TMEM154     | 4  | 4q31.3    | 153547277 | 153601191 | 0.0398 | 0.1736 | 0.4223 | 1  | 8  | 0 |
| LDLRAD3     | 11 | 11p13     | 35965628  | 36253686  | 0.0398 | 0.1736 | 0.4223 | 5  | 2  | 0 |
| CALML5      | 10 | 10p15.1   | 5540660   | 5541510   | 0.0398 | 0.1735 | 0.4224 | 15 | 0  | 1 |
| NUCB2       | 11 | 11p15.1   | 17298286  | 17353070  | 0.0398 | 0.1735 | 0.4224 | 6  | 5  | 0 |
| C20orf133   | 20 | 20p12.1   | 13976015  | 16033842  | 0.0398 | 0.1735 | 0.4224 | 4  | 7  | 1 |
| IQCC        | 1  | 1p35.1    | 32671248  | 32674272  | 0.0397 | 0.1735 | 0.4224 | 2  | 9  | 0 |
| NVL         | 1  | 1q42.11   | 224415039 | 224517884 | 0.0397 | 0.1734 | 0.4225 | 16 | 0  | 0 |
| DEPDC1B     | 5  | 5q12.1    | 59892749  | 59959593  | 0.0397 | 0.1734 | 0.4225 | 0  | 14 | 0 |
| SPEG        | 2  | 2q35      | 220299700 | 220362966 | 0.0397 | 0.1734 | 0.4225 | 2  | 6  | 0 |
| C15orf42    | 15 | 15q26.1   | 90118818  | 90171251  | 0.0397 | 0.1734 | 0.4225 | 7  | 3  | 0 |
| BUB1B       | 15 | 15q15.1   | 40453210  | 40513335  | 0.0397 | 0.1734 | 0.4225 | 0  | 9  | 0 |
| CCNT2       | 2  | 2q21.3    | 135675805 | 135714586 | 0.0397 | 0.1733 | 0.4226 | 2  | 9  | 0 |
| MOBKL2B     | 9  | 9p21.2    | 27325207  | 27529850  | 0.0397 | 0.1733 | 0.4226 | 4  | 10 | 0 |
| SPZ1        | 5  | 5q14.1    | 79615843  | 79617658  | 0.0396 | 0.1733 | 0.4226 | 0  | 14 | 0 |
| CCNJ        | 10 | 10q24.1   | 97803159  | 97820623  | 0.0395 | 0.1729 | 0.4228 | 2  | 10 | 0 |
| NMD3        | 3  | 3q26.1    | 160939099 | 160969795 | 0.0395 | 0.1729 | 0.4228 | 17 | 0  | 1 |
| ZNF44       | 19 | 19p13.2   | 12353948  | 12405714  | 0.0395 | 0.1727 | 0.4230 | 3  | 4  | 0 |
| CAB39L      | 13 | 13q14.2   | 49882789  | 50018262  | 0.0394 | 0.1726 | 0.4230 | 2  | 6  | 0 |
| PXMP4       | 20 | 20q11.22  | 32290548  | 32308136  | 0.0394 | 0.1726 | 0.4230 | 0  | 3  | 0 |
| CCDC14      | 3  | 3q21.1    | 123632300 | 123680255 | 0.0394 | 0.1726 | 0.4230 | 7  | 3  | 0 |
| NOD1        | 7  | 7p14.3    | 30464144  | 30518400  | 0.0394 | 0.1725 | 0.4231 | 3  | 7  | 0 |
| DCTN1       | 12 | 12q13.3   | 57924094  | 57940992  | 0.0394 | 0.1725 | 0.4231 | 1  | 8  | 0 |
| C1orf149    | 1  | 1p34.3    | 37951915  | 37980364  | 0.0393 | 0.1724 | 0.4232 | 1  | 7  | 0 |
| CCDC121     | 2  | 2p23.3    | 27848506  | 27851879  | 0.0393 | 0.1723 | 0.4232 | 6  | 1  | 0 |
| ANKRD17     | 4  | 4q13.3    | 73940505  | 74124502  | 0.0393 | 0.1723 | 0.4233 | 5  | 3  | 0 |
| NKTR1       | 3  | 3p12.1    | 42642147  | 42690232  | 0.0393 | 0.1723 | 0.4233 | 3  | 7  | 0 |
| NCOA5       | 20 | 20p13.12  | 44689636  | 44718591  | 0.0393 | 0.1722 | 0.4233 | 5  | 7  | 0 |
| LRP3        | 19 | 19q13.11  | 33685166  | 33699773  | 0.0393 | 0.1722 | 0.4233 | 3  | 1  | 0 |
| RNPS1       | 16 | 16p13.3   | 2303124   | 2318114   | 0.0393 | 0.1721 | 0.4234 | 3  | 4  | 0 |
| FAM162A     | 3  | 3q21.1    | 122103023 | 122128961 | 0.0392 | 0.1721 | 0.4234 | 7  | 3  | 0 |
| CYBSR1      | 1  | 1q32.1    | 202931004 | 202936404 | 0.0392 | 0.1720 | 0.4234 | 14 | 1  | 0 |
| MTHFD1      | 14 | 14q23.3   | 64854759  | 64926725  | 0.0392 | 0.1720 | 0.4235 | 1  | 9  | 0 |
| FSIP1       | 15 | 15q14     | 39892232  | 40075039  | 0.0392 | 0.1720 | 0.4235 | 0  | 8  | 0 |
| DNAJA3      | 16 | 16p13.3   | 4475858   | 4506773   | 0.0392 | 0.1720 | 0.4235 | 2  | 2  | 0 |
| MBD6        | 12 | 12q13.3   | 57916625  | 57923931  | 0.0392 | 0.1720 | 0.4235 | 1  | 8  | 0 |
| LARP2       | 4  | 4q28.2    | 128982503 | 129143545 | 0.0391 | 0.1718 | 0.4236 | 5  | 2  | 0 |
| PRIM2       | 6  | 6p11.2    | 57179603  | 57513375  | 0.0391 | 0.1718 | 0.4237 | 6  | 1  | 0 |
| MGEA5       | 10 | 10q24.32  | 103544200 | 103578222 | 0.0391 | 0.1718 | 0.4237 | 0  | 9  | 0 |
| LMNA        | 1  | 1q22      | 156052369 | 156109878 | 0.0391 | 0.1718 | 0.4237 | 15 | 0  | 0 |
| CNOT8       | 5  | 5q33.2    | 154238106 | 154256351 | 0.0391 | 0.1717 | 0.4237 | 0  | 14 | 0 |
| RARA        | 17 | 17q21.2   | 38465446  | 38513895  | 0.0391 | 0.1717 | 0.4237 | 2  | 10 | 0 |
| DLGAP4      | 20 | 20q11.23  | 34894303  | 35157040  | 0.0390 | 0.1716 | 0.4238 | 0  | 7  | 0 |
| SHOC2       | 10 | 10q25.2   | 112679301 | 112773424 | 0.0390 | 0.1716 | 0.4238 | 3  | 9  | 0 |
| JMJD1C      | 10 | 10q21.3   | 64926990  | 65225722  | 0.0390 | 0.1716 | 0.4239 | 4  | 2  | 0 |
| ZNF681      | 19 | 19p12     | 23921999  | 23941693  | 0.0390 | 0.1716 | 0.4239 | 6  | 3  | 0 |
| RCBTB2      | 13 | 13q14.2   | 49063103  | 49109872  | 0.0390 | 0.1716 | 0.4239 | 2  | 7  | 0 |
| FUZ         | 19 | 19q13.33  | 50310175  | 50316527  | 0.0390 | 0.1716 | 0.4239 | 3  | 6  | 0 |
| RAC2        | 22 | 22q13.1   | 37621312  | 37640488  | 0.0390 | 0.1716 | 0.4239 | 4  | 7  | 0 |
| PTF1A       | 10 | 10p12.2   | 23481460  | 23483179  | 0.0390 | 0.1716 | 0.4240 | 12 | 1  | 0 |
| CARD16      | 11 | 11q22.3   | 104912053 | 104916051 | 0.0390 | 0.1716 | 0.4240 | 5  | 3  | 0 |
| HYL5        | 11 | 11q24.2   | 125753509 | 125770540 | 0.0389 | 0.1715 | 0.4240 | 4  | 5  | 0 |
| CDH18       | 5  | 5p14.3    | 19473141  | 19988339  | 0.0389 | 0.1715 | 0.4240 | 8  | 3  | 0 |
| DUSP15      | 20 | 20q11.21  | 30435444  | 30456479  | 0.0389 | 0.1715 | 0.4240 | 0  | 6  | 0 |
| CDC2L6      | 6  | 6q21.1    | 110931181 | 111136540 | 0.0389 | 0.1715 | 0.4241 | 7  | 2  | 0 |
| TPPP3       | 16 | 16q22.1   | 67423714  | 67427421  | 0.0389 | 0.1715 | 0.4241 | 6  | 7  | 0 |
| APPL2       | 12 | 12q23.3   | 105567075 | 105630008 | 0.0389 | 0.1714 | 0.4241 | 1  | 9  | 0 |
| MAP2        | 2  | 2q34      | 210288771 | 210598842 | 0.0389 | 0.1714 | 0.4242 | 2  | 2  | 0 |
| C2orf67     | 2  | 2q34      | 210885435 | 211036107 | 0.0389 | 0.1714 | 0.4242 | 2  | 3  | 0 |
| YTHDC1      | 4  | 4q13.2    | 69176105  | 69215824  | 0.0388 | 0.1713 | 0.4242 | 4  | 2  | 0 |
| ZNF428      | 19 | 19q13.31  | 44111377  | 44124006  | 0.0388 | 0.1713 | 0.4242 | 3  | 7  | 0 |
| CD320       | 19 | 19p13.2   | 8367011   | 8373239   | 0.0388 | 0.1712 | 0.4243 | 1  | 5  | 0 |
| POMT1       | 9  | 9q34.13   | 134378289 | 134399193 | 0.0388 | 0.1711 | 0.4244 | 3  | 9  | 0 |
| SLC39A6     | 18 | 18q12.2   | 33688495  | 33709357  | 0.0387 | 0.1711 | 0.4244 | 7  | 9  | 0 |
| LEO1        | 15 | 15q21.2   | 52230224  | 52263979  | 0.0387 | 0.1711 | 0.4244 | 1  | 6  | 0 |
| FGFR1OP     | 6  | 6q27      | 167412816 | 167454065 | 0.0387 | 0.1711 | 0.4244 | 5  | 7  | 0 |
| PMM2        | 16 | 16p13.2   | 8891670   | 8943193   | 0.0387 | 0.1711 | 0.4244 | 1  | 5  | 0 |
| USP9X       | 23 | 23p11.4   | 40944888  | 41095832  | 0.0387 | 0.1710 | 0.4245 | 1  | 10 | 0 |
| FAM44B      | 5  | 5q35.2    | 173034547 | 173043656 | 0.0386 | 0.1707 | 0.4246 | 1  | 12 | 0 |
| DLAT        | 11 | 11q23.1   | 111895538 | 111935114 | 0.0386 | 0.1707 | 0.4246 | 5  | 2  | 0 |
| CCT8        | 21 | 21q21.3   | 30428126  | 30446118  | 0.0386 | 0.1707 | 0.4247 | 7  | 3  | 0 |
| CSRNP2      | 12 | 12q13.12  | 51454990  | 51477333  | 0.0386 | 0.1707 | 0.4247 | 0  | 9  | 0 |
| TMEM51      | 1  | 1p36.21   | 15479028  | 15546974  | 0.0386 | 0.1706 | 0.4247 | 1  | 13 | 0 |
| GOPC        | 6  | 6q22.1    | 117881432 | 117923681 | 0.0385 | 0.1704 | 0.4248 | 6  | 2  | 0 |
| DHX15       | 4  | 4p15.2    | 24529090  | 24586184  | 0.0385 | 0.1704 | 0.4249 | 0  | 18 | 0 |
| SMC2        | 9  | 9q31.1    | 106856541 | 106903690 | 0.0385 | 0.1703 | 0.4249 | 2  | 6  | 0 |
| MSL3        | 23 | 23p22.2   | 11776278  | 11793870  | 0.0385 | 0.1703 | 0.4249 | 4  | 11 | 0 |
| PIF5K1A     | 1  | 1q21.3    | 151170425 | 151222004 | 0.0384 | 0.1703 | 0.4250 | 16 | 1  | 0 |
| MED21       | 12 | 12p11.23  | 27175483  | 27182682  | 0.0384 | 0.1703 | 0.4250 | 6  | 5  | 0 |
| YKT6        | 7  | 7p13      | 44240578  | 44253892  | 0.0384 | 0.1703 | 0.4250 | 3  | 5  | 0 |
| AKR1CL2     | 10 | 10p15.1   | 4868402   | 4890249   | 0.0384 | 0.1702 | 0.4250 | 15 | 0  | 2 |
| GRHL1       | 2  | 2p25.1    | 10091822  | 10142495  | 0.0383 | 0.1699 | 0.4252 | 7  | 3  | 0 |
| ATP6V0B     | 1  | 1p34.1    | 44444062  | 44443971  | 0.0383 |        |        |    |    |   |

Supplementary Table 6  
Page 6

|               |    |                |           |           |        |        |        |    |    |   |
|---------------|----|----------------|-----------|-----------|--------|--------|--------|----|----|---|
| CWF19L1       | 10 | 10q24.31       | 101992055 | 102027437 | 0.0364 | 0.1638 | 0.4292 | 1  | 10 | 0 |
| SH3D19        | 4  | 4q31.3         | 152041433 | 152147660 | 0.0363 | 0.1637 | 0.4292 | 1  | 8  | 0 |
| KLK8          | 19 | 19q13.41       | 51499264  | 51504958  | 0.0363 | 0.1636 | 0.4293 | 3  | 5  | 0 |
| HJURP         | 2  | 2q37.1         | 234742062 | 234763212 | 0.0363 | 0.1636 | 0.4293 | 2  | 10 | 0 |
| VILL          | 3  | 3p22.2         | 38029550  | 38048679  | 0.0363 | 0.1636 | 0.4293 | 5  | 5  | 0 |
| RPL15         | 3  | 3p24.2         | 23958082  | 23963166  | 0.0362 | 0.1634 | 0.4294 | 7  | 5  | 0 |
| ZNFB38        | 2  | 2p13.2         | 71503723  | 71662191  | 0.0362 | 0.1632 | 0.4295 | 5  | 1  | 0 |
| PGD           | 1  | 1p36.22        | 10459085  | 10480201  | 0.0362 | 0.1632 | 0.4295 | 0  | 11 | 0 |
| AC097359.2-1  | 3  | 3p22.2         | 37284551  | 37285043  | 0.0362 | 0.1632 | 0.4296 | 5  | 5  | 0 |
| ATMIN         | 16 | 16q23.2        | 81069458  | 81080951  | 0.0361 | 0.1631 | 0.4297 | 1  | 8  | 0 |
| TCL1A         | 14 | 14q32.13       | 96176305  | 96180533  | 0.0361 | 0.1631 | 0.4297 | 4  | 11 | 0 |
| RPIA          | 2  | 2p11.2         | 88991176  | 89050452  | 0.0361 | 0.1631 | 0.4297 | 4  | 1  | 0 |
| RFX7          | 15 | 15q21.3        | 56379666  | 5635483   | 0.0361 | 0.1630 | 0.4298 | 1  | 4  | 0 |
| HSD11B2       | 16 | 16q22.1        | 67465036  | 67471452  | 0.0361 | 0.1628 | 0.4298 | 6  | 7  | 0 |
| EIF2C1        | 1  | 1p34.3         | 36335409  | 36389899  | 0.0361 | 0.1628 | 0.4298 | 0  | 5  | 0 |
| C12orf50      | 12 | 12q21.32       | 88373816  | 88423176  | 0.0360 | 0.1628 | 0.4299 | 1  | 8  | 0 |
| SLC35B4       | 7  | 7q33           | 133974089 | 134001827 | 0.0360 | 0.1628 | 0.4299 | 10 | 0  | 0 |
| EXOC6         | 10 | 10q23.33       | 94594470  | 94819250  | 0.0360 | 0.1626 | 0.4300 | 1  | 10 | 0 |
| CNDP2         | 18 | 18q22.3        | 72163597  | 72188356  | 0.0359 | 0.1624 | 0.4301 | 6  | 9  | 0 |
| HINT3         | 6  | 6q22.32        | 126277861 | 126301363 | 0.0359 | 0.1624 | 0.4301 | 11 | 2  | 1 |
| BECN1         | 17 | 17q21.31       | 40962150  | 40976310  | 0.0359 | 0.1624 | 0.4301 | 1  | 11 | 0 |
| RARS          | 5  | 5q34           | 167913463 | 167946307 | 0.0359 | 0.1623 | 0.4302 | 2  | 14 | 0 |
| NRBF2         | 10 | 10q21.3        | 64893007  | 64914783  | 0.0359 | 0.1623 | 0.4302 | 4  | 2  | 0 |
| C9orf102      | 9  | 9q22.32        | 98637900  | 98734673  | 0.0358 | 0.1621 | 0.4303 | 2  | 7  | 0 |
| WNK1          | 12 | 12p13.33       | 862225    | 1020618   | 0.0357 | 0.1618 | 0.4305 | 15 | 2  | 2 |
| CDC20         | 1  | 1p34.2         | 43824626  | 43828874  | 0.0357 | 0.1617 | 0.4305 | 3  | 3  | 0 |
| FRMD4A        | 10 | 10p13          | 13685706  | 14372883  | 0.0357 | 0.1617 | 0.4306 | 11 | 2  | 1 |
| RBM5          | 3  | 3p21.31        | 50126352  | 50156388  | 0.0357 | 0.1617 | 0.4306 | 0  | 10 | 0 |
| DYX1C1        | 15 | 15q21.3        | 55709058  | 55800432  | 0.0357 | 0.1617 | 0.4306 | 1  | 4  | 0 |
| ABCA5         | 17 | 17q24.3        | 67240876  | 67323323  | 0.0357 | 0.1617 | 0.4306 | 8  | 3  | 0 |
| USP1          | 1  | 1p31.3         | 62901968  | 62917473  | 0.0356 | 0.1615 | 0.4307 | 7  | 2  | 0 |
| RNF220        | 1  | 1p34.1         | 44870866  | 45117396  | 0.0356 | 0.1615 | 0.4308 | 3  | 3  | 0 |
| FOS           | 14 | 14q24.3        | 75745531  | 75748932  | 0.0356 | 0.1615 | 0.4308 | 1  | 10 | 0 |
| ADRM1         | 20 | 20q13.33       | 60878027  | 60883916  | 0.0356 | 0.1615 | 0.4308 | 7  | 7  | 0 |
| ADH5          | 4  | 4q23           | 99992129  | 100009931 | 0.0356 | 0.1615 | 0.4308 | 3  | 4  | 0 |
| SUPT6H        | 17 | 17q11.2        | 26989302  | 27029248  | 0.0356 | 0.1615 | 0.4308 | 1  | 9  | 0 |
| DACH1         | 13 | 13q21.33       | 72012098  | 72441330  | 0.0356 | 0.1615 | 0.4308 | 5  | 2  | 0 |
| DEPDC1        | 1  | 1p31.2         | 68939837  | 68962799  | 0.0356 | 0.1615 | 0.4309 | 5  | 3  | 0 |
| TCBA1         | 6  | 6q22.31        | 124125286 | 125146803 | 0.0355 | 0.1614 | 0.4309 | 10 | 1  | 1 |
| CUTC          | 10 | 10q24.2        | 101491958 | 101515893 | 0.0355 | 0.1614 | 0.4309 | 1  | 10 | 0 |
| B4GALT5       | 20 | 20q13.13       | 48249485  | 48330421  | 0.0355 | 0.1614 | 0.4309 | 7  | 4  | 0 |
| SBN02         | 19 | 19p13.3        | 1107634   | 1174282   | 0.0355 | 0.1614 | 0.4309 | 2  | 6  | 0 |
| IGSF8         | 1  | 1q23.2         | 160061130 | 160068733 | 0.0355 | 0.1614 | 0.4310 | 20 | 1  | 4 |
| KIAA1217      | 10 | 10p12.2-p12.1  | 23983675  | 24836772  | 0.0355 | 0.1614 | 0.4310 | 12 | 1  | 0 |
| CYTSA         | 22 | 22q11.23       | 24666786  | 24838324  | 0.0355 | 0.1614 | 0.4310 | 2  | 10 | 0 |
| SUV39H2       | 10 | 10p13          | 14920847  | 14946302  | 0.0355 | 0.1614 | 0.4310 | 10 | 2  | 1 |
| KLHL5         | 4  | 4p14           | 39046659  | 39128415  | 0.0355 | 0.1614 | 0.4310 | 1  | 13 | 0 |
| SLC38A2       | 12 | 12q13.11       | 46751972  | 46766645  | 0.0355 | 0.1614 | 0.4310 | 3  | 9  | 0 |
| ATG10         | 5  | 5q14.1-q14.2   | 81267844  | 81551208  | 0.0355 | 0.1614 | 0.4311 | 0  | 15 | 0 |
| UQCQRQ        | 5  | 5q31.1         | 132202319 | 132204536 | 0.0354 | 0.1612 | 0.4311 | 2  | 16 | 0 |
| BBX           | 3  | 3q13.12        | 107241783 | 107530047 | 0.0354 | 0.1612 | 0.4312 | 7  | 2  | 1 |
| WDR21A        | 14 | 14q24.2        | 73393085  | 73426356  | 0.0354 | 0.1612 | 0.4312 | 1  | 10 | 0 |
| POLR2J        | 7  | 7q22.1         | 102113550 | 102119381 | 0.0354 | 0.1611 | 0.4312 | 6  | 5  | 0 |
| RAPGEF6       | 5  | 5q31.1         | 130747187 | 130970929 | 0.0353 | 0.1610 | 0.4313 | 2  | 15 | 0 |
| FAM174A       | 5  | 5q21.1         | 99871044  | 99922442  | 0.0353 | 0.1609 | 0.4314 | 0  | 12 | 0 |
| UMODL1        | 21 | 21q22.3        | 43483068  | 43563105  | 0.0353 | 0.1609 | 0.4314 | 4  | 6  | 1 |
| SSH1          | 12 | 12q24.11       | 109180971 | 109251351 | 0.0353 | 0.1608 | 0.4314 | 4  | 8  | 0 |
| SYK           | 9  | 9q22.2         | 93664012  | 93660832  | 0.0353 | 0.1608 | 0.4315 | 4  | 8  | 0 |
| ATG12         | 5  | 5q22.3         | 115165815 | 115177499 | 0.0353 | 0.1608 | 0.4315 | 0  | 13 | 0 |
| LSR           | 19 | 19q13.12       | 35739559  | 35758865  | 0.0352 | 0.1607 | 0.4315 | 4  | 2  | 0 |
| ZNFB48        | 19 | 19q13.43       | 57901218  | 57912785  | 0.0352 | 0.1607 | 0.4315 | 2  | 6  | 0 |
| ELAC2         | 17 | 17p12          | 12895703  | 12921359  | 0.0352 | 0.1605 | 0.4317 | 2  | 16 | 0 |
| CASQ2         | 1  | 1p13.1         | 116242628 | 116311426 | 0.0352 | 0.1605 | 0.4317 | 5  | 5  | 0 |
| MRPS18A       | 6  | 6p21.1         | 43639042  | 43655528  | 0.0351 | 0.1603 | 0.4318 | 13 | 1  | 0 |
| COP21         | 12 | 12q13.13       | 54718911  | 54745633  | 0.0351 | 0.1603 | 0.4318 | 0  | 11 | 0 |
| PAG1          | 8  | 8q21.13        | 81880050  | 82024303  | 0.0351 | 0.1603 | 0.4318 | 12 | 1  | 2 |
| ZKSCAN5       | 7  | 7q22.1         | 99102273  | 99132323  | 0.0351 | 0.1603 | 0.4319 | 4  | 1  | 0 |
| PDE8A         | 15 | 15q25.3        | 85523671  | 85682376  | 0.0351 | 0.1602 | 0.4319 | 5  | 6  | 0 |
| TEF           | 22 | 22q13.2        | 41763392  | 41795326  | 0.0350 | 0.1601 | 0.4320 | 2  | 6  | 0 |
| PBX10         | 1  | 1p36.32        | 2336243   | 2344010   | 0.0350 | 0.1599 | 0.4321 | 4  | 12 | 0 |
| FASTKD3       | 5  | 5p15.31        | 7859273   | 7869122   | 0.0350 | 0.1599 | 0.4321 | 9  | 6  | 1 |
| MCM6          | 2  | 2q21.3         | 136597204 | 136634011 | 0.0349 | 0.1599 | 0.4322 | 4  | 9  | 0 |
| TP53BP2       | 1  | 1q41           | 223967596 | 224033674 | 0.0349 | 0.1597 | 0.4323 | 16 | 0  | 0 |
| FOXN1         | 12 | 12p13.33       | 2966852   | 2986303   | 0.0349 | 0.1596 | 0.4323 | 13 | 4  | 0 |
| ATP1B3        | 3  | 3q23           | 141595470 | 141645382 | 0.0349 | 0.1596 | 0.4323 | 11 | 0  | 0 |
| THYN1         | 11 | 11q25          | 134118173 | 134123260 | 0.0348 | 0.1596 | 0.4324 | 3  | 5  | 0 |
| HMGR          | 5  | 5q13.3         | 74632993  | 74657924  | 0.0348 | 0.1595 | 0.4324 | 0  | 16 | 0 |
| C10orf12      | 10 | 10q24.1        | 98741041  | 98745582  | 0.0348 | 0.1594 | 0.4325 | 1  | 9  | 0 |
| FIGS          | 9  | 9q34.11        | 130556975 | 130576556 | 0.0348 | 0.1594 | 0.4325 | 3  | 7  | 0 |
| ZNFB280D      | 15 | 15q21.3        | 56922379  | 57026284  | 0.0348 | 0.1594 | 0.4325 | 1  | 4  | 0 |
| FOXN3         | 14 | 14q31.3-q32.11 | 89622529  | 89883454  | 0.0348 | 0.1593 | 0.4326 | 3  | 10 | 0 |
| ARMCS         | 16 | 16p11.2        | 31469594  | 31478485  | 0.0348 | 0.1593 | 0.4326 | 5  | 1  | 0 |
| DHX35         | 20 | 20q11.23-q12   | 37590995  | 37668363  | 0.0347 | 0.1592 | 0.4327 | 1  | 10 | 0 |
| ZNFB131       | 5  | 5p12           | 43121642  | 43175821  | 0.0347 | 0.1592 | 0.4327 | 4  | 4  | 0 |
| SLCO3A1       | 15 | 15q26.1        | 92939838  | 92715685  | 0.0347 | 0.1592 | 0.4327 | 11 | 2  | 0 |
| CREB1         | 2  | 2q33.3         | 208394461 | 208470282 | 0.0347 | 0.1591 | 0.4327 | 2  | 3  | 0 |
| NOO1          | 16 | 16q22.1        | 69743307  | 69760533  | 0.0347 | 0.1591 | 0.4328 | 6  | 7  | 0 |
| MPHOSPH9      | 12 | 12q24.31       | 123637080 | 123706441 | 0.0346 | 0.1591 | 0.4328 | 2  | 8  | 0 |
| SIAT          | 11 | 11q24.2        | 124505694 | 124543763 | 0.0346 | 0.1590 | 0.4328 | 4  | 6  | 0 |
| SNX16         | 8  | 8q21.13        | 82711822  | 82754521  | 0.0346 | 0.1589 | 0.4329 | 12 | 1  | 2 |
| MTCH1         | 6  | 6p21.2         | 36935918  | 36953970  | 0.0346 | 0.1589 | 0.4329 | 11 | 1  | 0 |
| DEF8          | 16 | 16q24.3        | 90015151  | 90034467  | 0.0346 | 0.1588 | 0.4330 | 3  | 7  | 0 |
| YRDC          | 1  | 1p34.3         | 38268614  | 38273865  | 0.0345 | 0.1587 | 0.4331 | 1  | 7  | 0 |
| ISCU          | 12 | 12q23.3        | 108956294 | 108963158 | 0.0345 | 0.1586 | 0.4332 | 4  | 10 | 0 |
| PSMC3         | 11 | 11p11.2        | 47440320  | 47448024  | 0.0345 | 0.1585 | 0.4332 | 1  | 2  | 0 |
| RNMTL1        | 17 | 17p13.3        | 685513    | 695738    | 0.0345 | 0.1585 | 0.4332 | 0  | 10 | 0 |
| GAS8          | 16 | 16q24.3        | 90089008  | 90111379  | 0.0344 | 0.1585 | 0.4333 | 3  | 7  | 0 |
| MTX2          | 2  | 2q31.1         | 177134123 | 177202753 | 0.0344 | 0.1582 | 0.4334 | 6  | 3  | 0 |
| SGOL1         | 3  | 3p24.3         | 20202087  | 20227784  | 0.0344 | 0.1582 | 0.4334 | 7  | 5  | 0 |
| NUPL1         | 13 | 13q12.13       | 25875666  | 25916561  | 0.0343 | 0.1582 | 0.4335 | 0  | 5  | 0 |
| PFKFB1        | 23 | 23p11.21       | 54959590  | 55020511  | 0.0343 | 0.1582 | 0.4335 | 1  | 12 | 0 |
| PPHLN1        | 12 | 12q12          | 42719947  | 42842422  | 0.0343 | 0.1580 | 0.4336 | 4  | 6  | 0 |
| PRR14         | 16 | 16p11.2        | 30662223  | 30667733  | 0.0342 | 0.1578 | 0.4337 | 2  | 1  | 0 |
| KIF5B         | 10 | 10p11.22       | 32297940  | 32345371  | 0.0342 | 0.1578 | 0.4337 | 11 | 1  | 0 |
| GOLGB1        | 3  | 3q13.33        | 121382048 | 121468602 | 0.0342 | 0.1578 | 0.4337 | 5  | 3  | 0 |
| CPNE1         | 20 | 20q11.22       | 34213966  | 34287277  | 0.0342 | 0.1578 | 0.4338 | 0  | 6  | 0 |
| AFM1          | 23 | 23q26.1        | 129263337 | 129299808 | 0.0342 | 0.1576 | 0.4339 | 1  | 13 | 0 |
| GFM2          | 5  | 5q13.3         | 74017034  | 74063042  | 0.0341 | 0.1575 | 0.4339 | 0  | 17 | 0 |
| GSTA1         | 6  | 6p12.2         | 52656173  | 52668702  | 0.0341 | 0.1574 | 0.4340 | 11 | 1  | 0 |
| RP11-369J21.6 | 10 | 10q22.3        | 81838426  | 81852313  | 0.0341 | 0.1574 | 0.4340 | 2  | 4  | 0 |
| C11orf75      | 11 | 11q21          | 93211641  | 93276546  | 0.0341 | 0.1573 | 0.4340 | 6  | 3  | 0 |
| KCNH5         | 14 | 14q23.2        | 63173299  | 63568594  | 0.0341 | 0.1573 | 0.4340 | 1  | 9  | 0 |
| RBM33         | 7  | 7q36.3         | 155437203 | 15557479  | 0.0341 | 0.1573 | 0.4341 | 17 | 3  | 0 |
| AP3B1         | 5  | 5q22.3-q23.1   | 115177619 |           |        |        |        |    |    |   |

Supplementary Table 6  
Page 7

|              |    |               |           |           |        |          |        |    |    |   |
|--------------|----|---------------|-----------|-----------|--------|----------|--------|----|----|---|
| LRP5         | 11 | 11q13.2       | 68080108  | 68216739  | 0.0326 | 0.1529   | 0.4374 | 4  | 2  | 0 |
| PAPD5        | 16 | 16q12.1       | 50186864  | 50268221  | 0.0326 | 0.1529   | 0.4374 | 3  | 11 | 0 |
| CDC48        | 1  | 1p34.3        | 38158090  | 38175391  | 0.0326 | 0.1529   | 0.4374 | 1  | 7  | 0 |
| LRRC70       | 5  | 5q12.1        | 61874562  | 61877275  | 0.0326 | 0.1529   | 0.4374 | 0  | 12 | 0 |
| C6orf61      | 6  | 6q22.31       | 119134618 | 119256303 | 0.0325 | 0.1527   | 0.4375 | 7  | 1  | 1 |
| TNRC6C       | 17 | 17q25.3       | 76000249  | 76104916  | 0.0325 | 0.1527   | 0.4376 | 9  | 4  | 0 |
| RPL7L1       | 6  | 6p21.1        | 42847409  | 42855667  | 0.0325 | 0.1526   | 0.4376 | 11 | 1  | 0 |
| HSPD1        | 2  | 2q33.1        | 198351310 | 198381461 | 0.0324 | 0.1524   | 0.4377 | 3  | 6  | 0 |
| CN0T2        | 12 | 12q15         | 70636777  | 70748773  | 0.0323 | 0.1521   | 0.4379 | 2  | 8  | 0 |
| MTF1         | 1  | 1p34.3        | 38275240  | 38325292  | 0.0323 | 0.1521   | 0.4379 | 1  | 7  | 0 |
| MBNL2        | 13 | 13q32.1       | 97873688  | 98046374  | 0.0323 | 0.1520   | 0.4380 | 9  | 4  | 1 |
| USP33        | 1  | 1p31.1        | 78161676  | 78225537  | 0.0323 | 0.1519   | 0.4380 | 6  | 5  | 0 |
| USP8         | 15 | 15q21.2       | 50716579  | 50793276  | 0.0322 | 0.1518   | 0.4381 | 1  | 7  | 0 |
| ITPK1        | 14 | 14q32.12      | 93403259  | 93582263  | 0.0322 | 0.1518   | 0.4381 | 3  | 10 | 0 |
| TNRC6A       | 16 | 16p12.1       | 24741016  | 24837545  | 0.0322 | 0.1515   | 0.4383 | 0  | 5  | 0 |
| PTP4A1       | 6  | 6q12          | 64281920  | 64293488  | 0.0322 | 0.1515   | 0.4383 | 7  | 2  | 0 |
| OSBP10       | 3  | 3p23          | 31699382  | 32023238  | 0.0322 | 0.1515   | 0.4383 | 6  | 5  | 0 |
| DNAJB14      | 4  | 4q23          | 100819917 | 100867879 | 0.0322 | 0.1515   | 0.4383 | 3  | 4  | 0 |
| ZNF136       | 19 | 19p13.2       | 12273879  | 12300063  | 0.0322 | 0.1515   | 0.4383 | 3  | 4  | 0 |
| C7orf47      | 7  | 7q22.1        | 100032912 | 100034094 | 0.0321 | 0.1515   | 0.4383 | 4  | 3  | 0 |
| VPS26A       | 10 | 10q22.1       | 70883268  | 70932617  | 0.0321 | 0.1515   | 0.4384 | 1  | 2  | 0 |
| HEXB         | 5  | 5q13.3        | 73980969  | 74017111  | 0.0321 | 0.1515   | 0.4384 | 0  | 17 | 0 |
| UBE2W        | 8  | 8q21.11       | 74702842  | 74791110  | 0.0321 | 0.1514   | 0.4385 | 13 | 1  | 0 |
| DNAJC10      | 2  | 2q32.1        | 183580999 | 183643255 | 0.0321 | 0.1513   | 0.4385 | 6  | 2  | 0 |
| ZNF639       | 3  | 3q26.33       | 179041551 | 179053323 | 0.0321 | 0.1513   | 0.4386 | 16 | 0  | 0 |
| EPHX2        | 8  | 8p21.2-p21.1  | 27348645  | 27402486  | 0.0320 | 0.1513   | 0.4386 | 1  | 13 | 0 |
| NSD1         | 5  | 5q35.2-q35.3  | 176560080 | 176727211 | 0.0319 | 0.1509   | 0.4388 | 4  | 6  | 0 |
| CYTSB        | 17 | 17p11.2       | 19912614  | 20222339  | 0.0319 | 0.1509   | 0.4388 | 0  | 12 | 0 |
| ZNF70        | 15 | 15q14         | 35270547  | 35280468  | 0.0319 | 0.1509   | 0.4388 | 0  | 8  | 0 |
| TBC1D13      | 9  | 9q34.11       | 131549510 | 131572711 | 0.0319 | 0.1509   | 0.4389 | 3  | 7  | 0 |
| EIF2B3       | 1  | 1p34.1        | 45316450  | 45452282  | 0.0319 | 0.1506   | 0.4390 | 3  | 2  | 0 |
| STX4         | 16 | 16p11.2       | 31044319  | 31051484  | 0.0318 | 0.1506   | 0.4390 | 3  | 1  | 0 |
| ACSM1        | 16 | 16p12.3       | 20634559  | 20702578  | 0.0318 | 0.1506   | 0.4390 | 2  | 4  | 0 |
| BNIP1        | 1  | 1q21.3        | 151009034 | 151020075 | 0.0318 | 0.1506   | 0.4391 | 16 | 1  | 0 |
| HADHA        | 2  | 2p23.3        | 26413505  | 26467594  | 0.0318 | 0.1505   | 0.4391 | 7  | 1  | 0 |
| HIVEP2       | 6  | 6q24.2        | 143072604 | 143266338 | 0.0318 | 0.1505   | 0.4391 | 7  | 5  | 1 |
| ANKHD1       | 5  | 5q31.3        | 139781429 | 139929163 | 0.0318 | 0.1505   | 0.4392 | 0  | 12 | 0 |
| COL4A3BP     | 5  | 5q13.3        | 74666928  | 74807806  | 0.0318 | 0.1505   | 0.4392 | 0  | 16 | 0 |
| C1GALT1      | 7  | 7p22.1        | 7196565   | 7283980   | 0.0318 | 0.1505   | 0.4392 | 3  | 2  | 0 |
| SUCLG1       | 2  | 2p11.2        | 84650654  | 84686586  | 0.0317 | 0.1503   | 0.4393 | 4  | 1  | 0 |
| MFN2         | 1  | 1p36.22       | 12040238  | 12073571  | 0.0317 | 0.1503   | 0.4393 | 1  | 11 | 0 |
| CCL22        | 16 | 16q13-q21     | 57392718  | 57400099  | 0.0316 | 0.1500   | 0.4395 | 3  | 9  | 0 |
| CEPT1        | 1  | 1p13.3        | 111682249 | 111727724 | 0.0316 | 0.1500   | 0.4396 | 4  | 5  | 0 |
| MEGF8        | 19 | 19q13.2       | 42629761  | 42882921  | 0.0316 | 0.1497   | 0.4397 | 3  | 7  | 0 |
| GPN2         | 1  | 1p36.11       | 27205873  | 27216869  | 0.0315 | 0.1494   | 0.4399 | 0  | 10 | 0 |
| BCLAF1       | 6  | 6q23.3        | 136578001 | 136610989 | 0.0315 | 0.1494   | 0.4399 | 8  | 3  | 1 |
| HRASLS       | 3  | 3q29          | 192958914 | 192995527 | 0.0315 | 0.1494   | 0.4399 | 12 | 0  | 0 |
| MMAA         | 4  | 4q31.21       | 146540540 | 146581187 | 0.0314 | 0.1494   | 0.4400 | 4  | 6  | 0 |
| PLEKHM2      | 1  | 1p36.21       | 16008026  | 16061262  | 0.0314 | 0.1493   | 0.4400 | 0  | 13 | 0 |
| CROCC1       | 1  | 1p36.13       | 16944751  | 16971178  | 0.0314 | 0.1493   | 0.4400 | 0  | 13 | 0 |
| AL137229.4-1 | 14 | 14q32.31      | 102814623 | 102829253 | 0.0314 | 0.1493   | 0.4401 | 1  | 8  | 0 |
| STMN1        | 1  | 1p36.11       | 26210672  | 26233368  | 0.0314 | 0.1492   | 0.4401 | 1  | 12 | 0 |
| LIAS         | 4  | 4p14          | 39460665  | 39479269  | 0.0314 | 0.1492   | 0.4401 | 1  | 13 | 0 |
| PSPC1        | 13 | 13q12.11      | 20248896  | 20357142  | 0.0314 | 0.1491   | 0.4402 | 1  | 2  | 0 |
| TMPSR54      | 11 | 11q23.3       | 117947727 | 117990554 | 0.0314 | 0.1491   | 0.4402 | 5  | 5  | 0 |
| IARS2        | 1  | 1q41          | 220267444 | 220321380 | 0.0313 | 0.1491   | 0.4402 | 15 | 1  | 1 |
| DDX10        | 11 | 11q22.3       | 108535804 | 108611656 | 0.0313 | 0.1490   | 0.4403 | 5  | 3  | 0 |
| PGK1         | 23 | 23q21.1       | 77359666  | 77382322  | 0.0313 | 0.1490   | 0.4403 | 1  | 11 | 0 |
| DEF6         | 6  | 6p21.31       | 35265595  | 35289546  | 0.0313 | 0.1490   | 0.4403 | 9  | 0  | 0 |
| MEPCE        | 7  | 7q22.1        | 100028440 | 100031740 | 0.0313 | 0.1490   | 0.4403 | 4  | 3  | 0 |
| TBC1D23      | 3  | 3q12.1-q12.2  | 99979686  | 100044078 | 0.0313 | 0.1490   | 0.4404 | 4  | 2  | 0 |
| MSRA         | 8  | 8p23.1        | 9911779   | 10286399  | 0.0313 | 0.1489   | 0.4404 | 1  | 12 | 0 |
| VANGL1       | 1  | 1p13.1        | 116184574 | 116240845 | 0.0313 | 0.1489   | 0.4404 | 5  | 5  | 0 |
| OTUD7B       | 1  | 1q21.2        | 149912231 | 149982686 | 0.0312 | 0.1487   | 0.4405 | 15 | 1  | 0 |
| CNCL1        | 3  | 3q25.31       | 156865585 | 156878482 | 0.0311 | 0.1483   | 0.4407 | 13 | 0  | 1 |
| GPATCH1      | 19 | 19q13.11      | 33571786  | 33621318  | 0.0310 | 0.1480   | 0.4409 | 2  | 2  | 0 |
| NLRC5        | 16 | 16q13         | 57023410  | 57117436  | 0.0310 | 0.1480   | 0.4409 | 3  | 9  | 0 |
| RPN1         | 3  | 3q21.3        | 128338813 | 128369719 | 0.0310 | 0.1480   | 0.4409 | 7  | 2  | 0 |
| INPP4A       | 2  | 2q11.2        | 99061321  | 99207496  | 0.0310 | 0.1480   | 0.4410 | 6  | 4  | 1 |
| ZMYND11      | 10 | 10p15.3       | 180405    | 300577    | 0.0310 | 0.1479   | 0.4410 | 13 | 0  | 0 |
| RRN3         | 16 | 16p13.11      | 15153881  | 15188158  | 0.0310 | 0.1479   | 0.4410 | 4  | 2  | 0 |
| PTPLAD1      | 15 | 15q22.31      | 65822825  | 65870693  | 0.0310 | 0.1479   | 0.4411 | 2  | 5  | 0 |
| SCRN2        | 17 | 17q21.32      | 45915049  | 45918699  | 0.0310 | 0.1479   | 0.4411 | 1  | 7  | 0 |
| NIP2A        | 15 | 15q11.2       | 23005349  | 23034408  | 0.0310 | 0.1479   | 0.4411 | 1  | 7  | 0 |
| TJP2         | 9  | 9q21.11       | 71766562  | 71870118  | 0.0309 | 0.1479   | 0.4411 | 5  | 5  | 0 |
| CLTA         | 9  | 9p13.3        | 36190892  | 36212055  | 0.0309 | 0.1478   | 0.4412 | 5  | 9  | 0 |
| FKBP7        | 2  | 2q31.2        | 179328391 | 179343355 | 0.0309 | 0.1478   | 0.4412 | 5  | 3  | 0 |
| NUDT6        | 4  | 4q28.1        | 123813806 | 123844123 | 0.0309 | 0.1477   | 0.4413 | 4  | 2  | 0 |
| RSRC1        | 3  | 3q25.32       | 157827861 | 158262574 | 0.0309 | 0.1477   | 0.4413 | 14 | 0  | 0 |
| KIAA0753     | 17 | 17p13.2-p13.1 | 6481646   | 6544247   | 0.0308 | 0.1476   | 0.4414 | 0  | 12 | 0 |
| VSIG2        | 11 | 11q24.2       | 124617369 | 124622134 | 0.0307 | 0.1471   | 0.4417 | 5  | 5  | 0 |
| PSMB4        | 1  | 1q21.3        | 151372049 | 151374412 | 0.0307 | 0.1470   | 0.4417 | 16 | 1  | 0 |
| LRRC50       | 16 | 16q23.3-q24.1 | 84178865  | 84211523  | 0.0307 | 0.1469   | 0.4418 | 3  | 9  | 0 |
| TBC1D7       | 6  | 6p24.1        | 13305186  | 13328776  | 0.0307 | 0.1469   | 0.4418 | 13 | 3  | 0 |
| THOC5        | 22 | 22q12.2       | 29904157  | 29951205  | 0.0306 | 0.1468   | 0.4418 | 2  | 7  | 0 |
| ADAM9        | 8  | 8p11.22       | 38954505  | 38962777  | 0.0306 | 0.1468   | 0.4419 | 6  | 4  | 1 |
| COA3Y        | 17 | 17q21.2       | 40714092  | 40718295  | 0.0306 | 0.1468   | 0.4419 | 1  | 11 | 0 |
| C10orf11B    | 10 | 10q25.3       | 115881974 | 115934364 | 0.0306 | 0.1466   | 0.4420 | 4  | 7  | 0 |
| C12orf41     | 12 | 12q13.11      | 49046997  | 49076035  | 0.0306 | 0.1466   | 0.4420 | 0  | 8  | 0 |
| ZSWIM1       | 20 | 20q13.12      | 44509866  | 44513905  | 0.0306 | 0.1466   | 0.4420 | 5  | 7  | 0 |
| CLDN10       | 13 | 13q32.1       | 96085858  | 96231906  | 0.0305 | 0.1464   | 0.4421 | 9  | 4  | 0 |
| ZNF48        | 16 | 16p11.2       | 30407055  | 30411427  | 0.0305 | 0.1464   | 0.4421 | 2  | 2  | 0 |
| ISGF3G       | 14 | 14q12         | 24630422  | 24635772  | 0.0305 | 0.1464   | 0.4422 | 3  | 4  | 0 |
| WDR53        | 3  | 3q29          | 196281059 | 196295545 | 0.0305 | 0.1464   | 0.4422 | 11 | 1  | 0 |
| ST13         | 22 | 22q13.2       | 41220603  | 41252687  | 0.0305 | 0.1464   | 0.4422 | 1  | 6  | 0 |
| SNX14        | 6  | 6q14.3        | 86215214  | 86303629  | 0.0305 | 0.1464   | 0.4422 | 8  | 3  | 0 |
| THRAP4       | 17 | 17q21.1       | 38175350  | 38210889  | 0.0304 | 0.1462   | 0.4423 | 3  | 9  | 0 |
| ZNF207       | 17 | 17q11.2       | 30677150  | 30697467  | 0.0304 | 0.1461   | 0.4424 | 0  | 7  | 0 |
| CHTF8        | 16 | 16q22.1       | 69151913  | 69166484  | 0.0304 | 0.1461   | 0.4424 | 6  | 7  | 0 |
| KRTCAP2      | 1  | 1q22          | 155141885 | 155145804 | 0.0304 | 0.1460   | 0.4425 | 15 | 0  | 0 |
| EDC3         | 15 | 15q24.1       | 74922900  | 74988386  | 0.0304 | 0.1460   | 0.4425 | 3  | 5  | 0 |
| ARHGAP5      | 14 | 14q12         | 32546495  | 32628934  | 0.0304 | 0.1460   | 0.4425 | 4  | 4  | 0 |
| MEF2C        | 5  | 5q14.3        | 88014058  | 88199869  | 0.0304 | 0.1460   | 0.4425 | 1  | 12 | 0 |
| PER3         | 1  | 1p36.23       | 7844380   | 7905237   | 0.0303 | 0.1459   | 0.4426 | 1  | 11 | 0 |
| SNRPB        | 20 | 20p13         | 2442281   | 2451499   | 0.0303 | 0.1459   | 0.4427 | 3  | 7  | 0 |
| STK38L       | 12 | 12p11.23      | 27397076  | 27478888  | 0.0303 | 0.1458   | 0.4427 | 7  | 5  | 0 |
| PFKL         | 21 | 21q22.3       | 45719930  | 45747259  | 0.0303 | 0.1458   | 0.4427 | 5  | 6  | 0 |
| PROKR2       | 20 | 20p12.3       | 5282622   | 5295059   | 0.0303 | 0.1458   | 0.4427 | 2  | 7  | 0 |
| MGRN1        | 16 | 16p13.3       | 4674826   | 4740975   | 0.0302 | 0.1456   | 0.4429 | 2  | 2  | 0 |
| YPCL2        | 17 | 17q22         | 57409053  | 57479095  | 0.0302 | 0.1453   | 0.4430 | 5  | 4  | 0 |
| CNP          | 17 | 17q21.2       | 40118759  | 40129754  | 0.0301 | 0.1452   | 0.4431 | 2  | 11 | 0 |
| KIAA0564     | 13 | 13q14.11      | 42140961  | 42535221  | 0.0301 | 0.1451   | 0.4432 | 2  | 6  | 0 |
| RAB5B        | 12 | 12q13.2       | 56367862  | 56384669  | 0.0301 | 0.1451   | 0.4432 | 1  | 7  | 0 |
| ELF2         | 4  | 4q31.1        | 139878671 | 14008372  | 0.0301 | 0.1450</ |        |    |    |   |

Supplementary Table 6  
Page 8

|                |    |                |           |            |        |        |        |    |    |   |
|----------------|----|----------------|-----------|------------|--------|--------|--------|----|----|---|
| KALRN          | 3  | 3q21.1-q21.2   | 123798870 | 124440036  | 0.0285 | 0.1398 | 0.4471 | 7  | 3  | 0 |
| FGD3           | 9  | 9q22.31        | 95709601  | 95798518   | 0.0284 | 0.1396 | 0.4472 | 3  | 8  | 0 |
| ECD            | 10 | 10q22.1-q22.2  | 74894283  | 74927853   | 0.0284 | 0.1396 | 0.4473 | 2  | 4  | 0 |
| ATP6V0D1       | 16 | 16q22.1        | 67471917  | 67515089   | 0.0284 | 0.1395 | 0.4473 | 6  | 7  | 0 |
| DDX24          | 14 | 14q32.12       | 94517284  | 94547558   | 0.0284 | 0.1395 | 0.4473 | 4  | 10 | 0 |
| WDR73          | 15 | 15q25.2        | 85186014  | 85197521   | 0.0284 | 0.1394 | 0.4474 | 5  | 6  | 0 |
| MTHFD1L        | 6  | 6q25.1         | 151186691 | 151423021  | 0.0284 | 0.1394 | 0.4474 | 3  | 7  | 0 |
| ALS2CR4        | 2  | 2q33.1         | 202484907 | 202508293  | 0.0284 | 0.1394 | 0.4474 | 2  | 6  | 0 |
| NPEPPS         | 17 | 17q21.32       | 45608444  | 45700641   | 0.0283 | 0.1393 | 0.4475 | 1  | 6  | 0 |
| CELA1          | 12 | 12q13.13       | 51722227  | 51740463   | 0.0283 | 0.1392 | 0.4476 | 1  | 9  | 0 |
| PLEKHA5        | 12 | 12p12.3        | 19282648  | 19529331   | 0.0283 | 0.1392 | 0.4476 | 6  | 3  | 0 |
| FBXO3          | 11 | 11p13          | 33762490  | 33796071   | 0.0283 | 0.1390 | 0.4477 | 5  | 2  | 0 |
| UVRAG          | 11 | 11q13.5        | 75526212  | 75855282   | 0.0282 | 0.1389 | 0.4478 | 5  | 2  | 0 |
| FAM160A2       | 11 | 11p15.4        | 6232565   | 6255941    | 0.0282 | 0.1389 | 0.4478 | 2  | 6  | 0 |
| TTC38          | 22 | 22q13.31       | 46663858  | 46689903   | 0.0282 | 0.1389 | 0.4478 | 5  | 6  | 0 |
| RASA4          | 7  | 7q22.1         | 102220119 | 102257205  | 0.0282 | 0.1389 | 0.4478 | 6  | 4  | 0 |
| LOR            | 1  | 1q21.3         | 153232179 | 153234600  | 0.0282 | 0.1389 | 0.4478 | 17 | 1  | 1 |
| ZXDC           | 3  | 3q21.3         | 126156445 | 126194762  | 0.0282 | 0.1388 | 0.4479 | 7  | 4  | 0 |
| HIP1R          | 12 | 12q24.31       | 123319497 | 123347507  | 0.0281 | 0.1387 | 0.4480 | 2  | 6  | 0 |
| EDA2R          | 23 | 23q12          | 65815484  | 65858883   | 0.0281 | 0.1387 | 0.4480 | 1  | 9  | 0 |
| LSM3           | 3  | 3p25.1         | 14220337  | 14239836   | 0.0281 | 0.1387 | 0.4480 | 7  | 3  | 0 |
| MCOLN1         | 19 | 19p13.2        | 7587514   | 7598868    | 0.0281 | 0.1387 | 0.4480 | 0  | 5  | 0 |
| ZNF625         | 19 | 19p13.2        | 12242932  | 12267546   | 0.0281 | 0.1387 | 0.4480 | 3  | 4  | 0 |
| PPAP2A         | 5  | 5q11.2         | 54720685  | 54830873   | 0.0281 | 0.1387 | 0.4480 | 0  | 12 | 0 |
| DARS           | 2  | 2q21.3         | 136664254 | 136743670  | 0.0281 | 0.1387 | 0.4481 | 4  | 9  | 0 |
| RABGAP1        | 9  | 9q33.2-q33.3   | 125703112 | 125867147  | 0.0281 | 0.1387 | 0.4481 | 1  | 8  | 0 |
| ABCF7          | 7  | 7q36.1         | 150904923 | 150924317  | 0.0281 | 0.1386 | 0.4482 | 13 | 1  | 0 |
| ARDC2          | 19 | 19p13.11       | 18111944  | 18124903   | 0.0281 | 0.1386 | 0.4482 | 3  | 3  | 0 |
| WDR26          | 1  | 1q42.11-q42.12 | 224673105 | 2246624735 | 0.0280 | 0.1384 | 0.4483 | 16 | 0  | 0 |
| NEIL2          | 8  | 8p23.1         | 11632712  | 11644854   | 0.0280 | 0.1383 | 0.4483 | 1  | 12 | 0 |
| C7orf36        | 7  | 7p14.1         | 39605693  | 39649879   | 0.0280 | 0.1383 | 0.4484 | 3  | 9  | 0 |
| BRAP           | 12 | 12q24.12       | 112079951 | 112123790  | 0.0280 | 0.1382 | 0.4484 | 2  | 7  | 0 |
| ACVR1          | 2  | 2q24.1         | 158592961 | 158732374  | 0.0279 | 0.1382 | 0.4485 | 4  | 4  | 0 |
| RCE1           | 11 | 11q13.2        | 66610883  | 66614003   | 0.0279 | 0.1380 | 0.4486 | 4  | 1  | 0 |
| DOCK7          | 1  | 1p31.3         | 62920399  | 63153969   | 0.0279 | 0.1380 | 0.4486 | 7  | 2  | 0 |
| TRIM46         | 1  | 1q22           | 155146346 | 155157445  | 0.0278 | 0.1378 | 0.4487 | 15 | 0  | 0 |
| SRPX2          | 23 | 23q22.1        | 99899163  | 99926294   | 0.0278 | 0.1378 | 0.4487 | 1  | 13 | 0 |
| MYH9           | 22 | 22q12.3        | 36677327  | 36784012   | 0.0278 | 0.1377 | 0.4488 | 3  | 8  | 0 |
| MFSD8          | 4  | 4q28.2         | 128838961 | 128887139  | 0.0278 | 0.1376 | 0.4489 | 5  | 2  | 0 |
| CTNNA1         | 9  | 9q31.3         | 111704858 | 111775779  | 0.0278 | 0.1376 | 0.4489 | 1  | 10 | 0 |
| EF3            | 14 | 14q11.2        | 23825614  | 23834842   | 0.0278 | 0.1376 | 0.4490 | 3  | 4  | 0 |
| WWC3           | 23 | 23p22.2        | 9983795   | 10112515   | 0.0278 | 0.1376 | 0.4490 | 4  | 13 | 0 |
| AP000872.5-1   | 11 | 11q22.1        | 100558407 | 100861656  | 0.0278 | 0.1376 | 0.4490 | 5  | 3  | 0 |
| CEBPG          | 19 | 19q13.11       | 33864609  | 33873591   | 0.0277 | 0.1376 | 0.4490 | 3  | 1  | 0 |
| C19orf48       | 19 | 19q13.33       | 51300962  | 51307974   | 0.0277 | 0.1375 | 0.4490 | 3  | 5  | 0 |
| KDELR3         | 22 | 22q13.1        | 38864083  | 38879445   | 0.0277 | 0.1375 | 0.4491 | 2  | 6  | 0 |
| SLC22A5        | 5  | 5q31.1         | 131705401 | 131731298  | 0.0277 | 0.1375 | 0.4491 | 3  | 16 | 0 |
| CPM            | 12 | 12q15          | 69244960  | 69326664   | 0.0277 | 0.1375 | 0.4491 | 3  | 8  | 0 |
| SUPT16H        | 14 | 14q11.2        | 21819631  | 21852425   | 0.0277 | 0.1375 | 0.4491 | 2  | 4  | 0 |
| PRM3           | 16 | 16p13.13       | 11367144  | 11367452   | 0.0277 | 0.1374 | 0.4492 | 3  | 4  | 0 |
| BAALC          | 8  | 8q22.3         | 104152921 | 104242530  | 0.0277 | 0.1374 | 0.4492 | 19 | 0  | 2 |
| PDLIM3         | 4  | 4q35.1         | 186422854 | 186456712  | 0.0276 | 0.1374 | 0.4492 | 4  | 10 | 0 |
| ATG2B          | 14 | 14q32.2        | 96747595  | 96829678   | 0.0276 | 0.1373 | 0.4493 | 3  | 11 | 0 |
| PAN2           | 12 | 12q13.3        | 56710718  | 56727825   | 0.0276 | 0.1373 | 0.4493 | 1  | 7  | 0 |
| EHBP1L1        | 11 | 11q13.1        | 65343509  | 65360115   | 0.0276 | 0.1373 | 0.4493 | 5  | 1  | 0 |
| FRMPD1         | 9  | 9p13.2         | 37651052  | 37746901   | 0.0276 | 0.1373 | 0.4493 | 7  | 9  | 0 |
| MEOX1          | 17 | 17q21.31       | 41717770  | 41739262   | 0.0276 | 0.1373 | 0.4494 | 1  | 11 | 0 |
| PDE12          | 3  | 3p14.3         | 57541981  | 57547758   | 0.0276 | 0.1372 | 0.4494 | 1  | 10 | 0 |
| ZNF547         | 19 | 19q13.43       | 57874891  | 57890923   | 0.0276 | 0.1372 | 0.4494 | 2  | 6  | 0 |
| GRIA4          | 11 | 11q22.3        | 105480900 | 105852819  | 0.0276 | 0.1372 | 0.4494 | 5  | 3  | 0 |
| ZDHHC12        | 9  | 9q34.11        | 131483148 | 131486408  | 0.0276 | 0.1372 | 0.4495 | 3  | 7  | 0 |
| ZNF738         | 19 | 19p12          | 21541732  | 21562099   | 0.0275 | 0.1371 | 0.4496 | 6  | 3  | 0 |
| ZMYM5          | 13 | 13q12.11       | 20397622  | 20437776   | 0.0275 | 0.1371 | 0.4496 | 1  | 2  | 0 |
| SFRS2B         | 11 | 11q21          | 94800056  | 94804388   | 0.0275 | 0.1370 | 0.4496 | 6  | 3  | 0 |
| RFX4           | 12 | 12q23.3        | 106976685 | 107156581  | 0.0275 | 0.1370 | 0.4497 | 2  | 9  | 0 |
| GLS            | 2  | 2q32.2         | 191745597 | 191830272  | 0.0275 | 0.1370 | 0.4497 | 6  | 2  | 0 |
| CIAO1          | 2  | 2q11.2         | 96931884  | 96939892   | 0.0275 | 0.1370 | 0.4497 | 7  | 4  | 1 |
| OR1D2          | 17 | 17p13.3        | 2995352   | 2996290    | 0.0274 | 0.1369 | 0.4498 | 0  | 10 | 0 |
| USP15          | 12 | 12q14.1        | 62654187  | 62799898   | 0.0274 | 0.1369 | 0.4498 | 3  | 9  | 0 |
| DNAJA1         | 9  | 9p21.1         | 33025242  | 33039277   | 0.0274 | 0.1369 | 0.4498 | 3  | 8  | 0 |
| TADA1L         | 1  | 1q24.1         | 166825753 | 166845654  | 0.0274 | 0.1369 | 0.4498 | 15 | 0  | 0 |
| LDHA           | 11 | 11p15.1        | 18415936  | 18429765   | 0.0274 | 0.1369 | 0.4498 | 4  | 5  | 0 |
| TANK           | 2  | 2q24.2         | 161993438 | 162092732  | 0.0274 | 0.1369 | 0.4498 | 5  | 4  | 0 |
| DLG3           | 23 | 23q13.1        | 69664724  | 69725337   | 0.0274 | 0.1369 | 0.4498 | 1  | 8  | 0 |
| ZNF26          | 12 | 12q24.33       | 133563056 | 133589153  | 0.0274 | 0.1369 | 0.4499 | 1  | 6  | 0 |
| UTX            | 23 | 23p11.3        | 44732423  | 44971847   | 0.0274 | 0.1368 | 0.4500 | 1  | 13 | 0 |
| TMEM189-UBE2V1 | 20 | 20q13.13       | 48697661  | 48770271   | 0.0274 | 0.1368 | 0.4500 | 7  | 4  | 0 |
| RBM23          | 14 | 14q11.2        | 23369855  | 23388396   | 0.0274 | 0.1368 | 0.4500 | 3  | 4  | 0 |
| DZIP1          | 13 | 13q32.1        | 96230457  | 96296957   | 0.0273 | 0.1367 | 0.4500 | 9  | 4  | 0 |
| NUF2           | 1  | 1q23.3         | 163291723 | 163325553  | 0.0273 | 0.1367 | 0.4501 | 18 | 1  | 2 |
| RP11-544M22.4  | 1  | 1q23.3         | 161007421 | 161008780  | 0.0273 | 0.1366 | 0.4501 | 19 | 0  | 2 |
| C1orf91        | 1  | 1p35.1         | 32680079  | 32687944   | 0.0273 | 0.1366 | 0.4501 | 2  | 9  | 0 |
| ATA25          | 17 | 17q11.2        | 29159020  | 29222295   | 0.0272 | 0.1363 | 0.4503 | 0  | 6  | 0 |
| VAPB           | 20 | 20q13.32       | 56964245  | 57021959   | 0.0272 | 0.1362 | 0.4504 | 8  | 5  | 0 |
| KIAA1109       | 4  | 4q27           | 123073488 | 123283907  | 0.0272 | 0.1362 | 0.4504 | 4  | 2  | 0 |
| SLC11A2        | 12 | 12q13.12       | 51375509  | 51422008   | 0.0272 | 0.1362 | 0.4504 | 0  | 9  | 0 |
| CSK            | 15 | 15q24.1        | 75074425  | 75095537   | 0.0272 | 0.1362 | 0.4504 | 3  | 5  | 0 |
| BSPRY          | 9  | 9q32           | 116111812 | 116133512  | 0.0272 | 0.1361 | 0.4505 | 2  | 8  | 0 |
| SVIL           | 10 | 10p11.23       | 29746277  | 30024730   | 0.0272 | 0.1361 | 0.4505 | 12 | 2  | 0 |
| RELN           | 7  | 7q22.1         | 103112231 | 103629963  | 0.0272 | 0.1361 | 0.4505 | 7  | 3  | 0 |
| ANKRD49        | 11 | 11q21          | 94227153  | 94232737   | 0.0271 | 0.1361 | 0.4505 | 6  | 3  | 0 |
| ARF1GAP        | 20 | 20q13.33       | 61904165  | 61921142   | 0.0271 | 0.1361 | 0.4505 | 9  | 7  | 0 |
| FOXC1          | 6  | 6p25.3         | 1610681   | 1614127    | 0.0271 | 0.1361 | 0.4506 | 11 | 4  | 0 |
| ALKBH7         | 19 | 19p13.3        | 6372444   | 6375040    | 0.0271 | 0.1360 | 0.4506 | 0  | 6  | 0 |
| INO80          | 15 | 15q15.1        | 41271081  | 41408340   | 0.0271 | 0.1360 | 0.4507 | 0  | 10 | 0 |
| CA11           | 19 | 19q13.33       | 49141272  | 49149451   | 0.0271 | 0.1359 | 0.4507 | 3  | 7  | 0 |
| ITFG1          | 16 | 16q12.1        | 47189314  | 47495018   | 0.0271 | 0.1359 | 0.4507 | 3  | 7  | 0 |
| PRKG2          | 4  | 4q21.21        | 82009837  | 82136188   | 0.0271 | 0.1359 | 0.4507 | 4  | 5  | 0 |
| KIAA1522       | 1  | 1p35.1         | 33207486  | 33240571   | 0.0271 | 0.1359 | 0.4508 | 2  | 8  | 0 |
| NCKAP1L        | 12 | 12q13.13-q13.2 | 54891495  | 54936898   | 0.0271 | 0.1359 | 0.4508 | 0  | 11 | 0 |
| CEP350         | 1  | 1q25.2         | 179923908 | 180084014  | 0.0271 | 0.1359 | 0.4508 | 18 | 0  | 0 |
| CBLB           | 3  | 3q13.11        | 105374305 | 105588396  | 0.0271 | 0.1359 | 0.4508 | 5  | 2  | 0 |
| KRIT1          | 7  | 7q21.2         | 91828283  | 91875480   | 0.0270 | 0.1359 | 0.4508 | 9  | 0  | 1 |
| CHD9           | 16 | 16q12.2        | 53088945  | 53361413   | 0.0270 | 0.1359 | 0.4509 | 3  | 11 | 0 |
| C14orf145      | 14 | 14q31.1        | 80962817  | 81405884   | 0.0270 | 0.1359 | 0.4509 | 1  | 10 | 0 |
| ADFP           | 9  | 9p22.1         | 19115760  | 19149276   | 0.0270 | 0.1358 | 0.4509 | 4  | 9  | 0 |
| ZBTB39         | 12 | 12q13.3        | 57392618  | 57400230   | 0.0270 | 0.1358 | 0.4509 | 1  | 8  | 0 |
| MON2           | 12 | 12q14.1        | 62860597  | 62991363   | 0.0269 | 0.1356 | 0.4511 | 3  | 9  | 0 |
| CADM4          | 19 | 19q13.31       | 44126522  | 44143991   | 0.0269 | 0.1355 | 0.4511 | 3  | 7  | 0 |
| KLHDC5         | 12 | 12p11.22       | 27933187  | 27959972   | 0.0269 | 0.1354 | 0.4512 | 8  | 5  | 0 |
| ARHGFE5        | 7  | 7q35           | 144052433 | 144407721  | 0.0269 | 0.1354 | 0.4512 | 11 | 1  | 0 |
| HMOB1          | 13 | 13q12.3        | 31032877  | 31191734   | 0.0268 | 0.1354 | 0.4513 | 3  | 4  | 0 |
| PEX7           | 6  | 6q23.3         | 137143702 | 137235071  | 0.0268 | 0.1351 | 0.4514 | 7  | 3  | 1 |
| LPGAT1         | 1  | 1q32.3         |           |            |        |        |        |    |    |   |

Supplementary Table 6  
Page 9

|              |    |                |             |           |        |        |        |    |    |   |
|--------------|----|----------------|-------------|-----------|--------|--------|--------|----|----|---|
| SPEN         | 1  | 1p36.21-p36.13 | 16174359    | 16266950  | 0.0255 | 0.1305 | 0.4550 | 0  | 14 | 0 |
| KCTD2        | 17 | 17q25.1        | 73043279    | 73061979  | 0.0254 | 0.1303 | 0.4551 | 6  | 3  | 0 |
| IP6K2        | 3  | 3p21.31        | 48725437    | 48777796  | 0.0254 | 0.1303 | 0.4551 | 0  | 8  | 0 |
| PGM1         | 1  | 1p31.3         | 64058947    | 64125912  | 0.0254 | 0.1303 | 0.4551 | 7  | 2  | 0 |
| PTCD3        | 2  | 2p11.2         | 86333305    | 86369280  | 0.0254 | 0.1303 | 0.4552 | 4  | 0  | 0 |
| TMEM123      | 11 | 11q22.2        | 102267058   | 102323775 | 0.0254 | 0.1301 | 0.4553 | 6  | 3  | 0 |
| MRPL27       | 17 | 17q21.33       | 48445231    | 48450562  | 0.0253 | 0.1300 | 0.4554 | 2  | 6  | 0 |
| USP35        | 11 | 11q14.1        | 77899958    | 77925753  | 0.0253 | 0.1299 | 0.4554 | 5  | 2  | 0 |
| KIAA0174     | 16 | 16q22.2        | 71929418    | 71962906  | 0.0253 | 0.1299 | 0.4555 | 3  | 7  | 0 |
| ZFP37        | 9  | 9q32           | 115804174   | 115818996 | 0.0253 | 0.1299 | 0.4555 | 2  | 8  | 0 |
| NDUFB8       | 10 | 10q24.31       | 102283497   | 102289757 | 0.0253 | 0.1299 | 0.4555 | 0  | 10 | 0 |
| ZCCHC14      | 16 | 16q24.2        | 87439877    | 87525460  | 0.0253 | 0.1298 | 0.4556 | 3  | 9  | 0 |
| ENPP5        | 6  | 6p21.1         | 46126926    | 46138717  | 0.0253 | 0.1298 | 0.4556 | 11 | 1  | 0 |
| HFE          | 6  | 6p22.2         | 26087448    | 26097067  | 0.0253 | 0.1298 | 0.4556 | 8  | 0  | 0 |
| AFP          | 4  | 4q13.3         | 74301880    | 74321494  | 0.0252 | 0.1298 | 0.4557 | 5  | 3  | 0 |
| MRPS14       | 1  | 1q25.1         | 174983128   | 174992561 | 0.0252 | 0.1297 | 0.4557 | 16 | 1  | 0 |
| PTPRF        | 1  | 1p34.2         | 43996547    | 44089343  | 0.0252 | 0.1295 | 0.4558 | 3  | 3  | 0 |
| TBC1D2B      | 15 | 15q24.3-q25.1  | 78267327    | 78369994  | 0.0252 | 0.1295 | 0.4559 | 5  | 6  | 0 |
| AURKC        | 19 | 19q13.43       | 57742377    | 57746915  | 0.0252 | 0.1294 | 0.4559 | 2  | 6  | 0 |
| ERMP1        | 9  | 9p24.1         | 5784571     | 5833081   | 0.0251 | 0.1293 | 0.4560 | 6  | 9  | 0 |
| C7orf10      | 7  | 7p14.1         | 40174575    | 40900362  | 0.0251 | 0.1293 | 0.4560 | 3  | 9  | 0 |
| ZNF83        | 19 | 19q13.41       | 53115620    | 53141644  | 0.0251 | 0.1291 | 0.4562 | 4  | 5  | 0 |
| MTRF1L       | 6  | 6q25.2         | 153308400   | 153323925 | 0.0250 | 0.1289 | 0.4563 | 3  | 7  | 0 |
| RIMS1        | 6  | 6q13           | 72596406    | 73112508  | 0.0250 | 0.1288 | 0.4564 | 6  | 1  | 0 |
| TUBGCP6      | 22 | 22q13.33       | 50656118    | 50683400  | 0.0250 | 0.1287 | 0.4564 | 5  | 5  | 0 |
| RSRC2        | 12 | 12q24.31       | 122989273   | 123011547 | 0.0249 | 0.1286 | 0.4565 | 2  | 6  | 0 |
| ATG16L1      | 2  | 2q37.1         | 234118697   | 234204320 | 0.0249 | 0.1286 | 0.4565 | 2  | 10 | 0 |
| APL1         | 19 | 19q13.12       | 36359401    | 36370699  | 0.0249 | 0.1286 | 0.4566 | 5  | 1  | 0 |
| VGLL4        | 3  | 3p25.3         | 11597544    | 11766453  | 0.0249 | 0.1285 | 0.4566 | 6  | 2  | 0 |
| AC018452.11  | 3  | 3q25.2         | 153839149   | 153975616 | 0.0249 | 0.1285 | 0.4566 | 13 | 0  | 0 |
| FARSLB       | 2  | 2q36.1         | 223436162   | 223520827 | 0.0249 | 0.1285 | 0.4566 | 1  | 6  | 0 |
| METTL8       | 2  | 2q31.1         | 172179761   | 172291312 | 0.0249 | 0.1284 | 0.4567 | 6  | 3  | 0 |
| PRDM4        | 12 | 12q23.3        | 108126644   | 108154914 | 0.0249 | 0.1284 | 0.4567 | 2  | 10 | 0 |
| AC109782.7   | 3  | 3q11.2         | 96496033    | 96496531  | 0.0248 | 0.1283 | 0.4568 | 3  | 1  | 0 |
| MAN1A2       | 1  | 1p12           | 117910071   | 118069161 | 0.0248 | 0.1282 | 0.4569 | 4  | 6  | 0 |
| PAH          | 12 | 12q23.2        | 103232104   | 103311381 | 0.0248 | 0.1282 | 0.4569 | 0  | 10 | 0 |
| STAR5        | 15 | 15q25.1        | 81605014    | 81616524  | 0.0248 | 0.1282 | 0.4569 | 5  | 7  | 0 |
| NFE2L2       | 2  | 2q31.2         | 178092323   | 178129859 | 0.0248 | 0.1282 | 0.4569 | 5  | 3  | 0 |
| TXNL4A       | 18 | 18q23          | 77732869    | 77748532  | 0.0248 | 0.1281 | 0.4570 | 6  | 10 | 0 |
| VPS36        | 13 | 13q14.3        | 52986739    | 53024763  | 0.0247 | 0.1279 | 0.4571 | 3  | 5  | 0 |
| LRRN2        | 1  | 1q32.1         | 204586298   | 204654597 | 0.0247 | 0.1277 | 0.4573 | 15 | 1  | 0 |
| HSPA2        | 14 | 14q23.3        | 65002623    | 65009955  | 0.0247 | 0.1277 | 0.4573 | 1  | 9  | 0 |
| FRS2         | 12 | 12q15          | 69864129    | 69973559  | 0.0246 | 0.1276 | 0.4573 | 2  | 8  | 0 |
| ZNF16        | 8  | 8q24.3         | 146155746   | 146176274 | 0.0246 | 0.1276 | 0.4573 | 17 | 1  | 0 |
| AC090587.2   | 11 | 11p15.4        | 3819049     | 3847601   | 0.0246 | 0.1276 | 0.4574 | 2  | 6  | 0 |
| RPL14        | 3  | 3p22.1         | 40498801    | 40503858  | 0.0246 | 0.1276 | 0.4574 | 2  | 5  | 0 |
| GALT         | 9  | 9p13.3         | 34646635    | 34650571  | 0.0246 | 0.1276 | 0.4574 | 5  | 9  | 0 |
| ZNF528       | 19 | 19q13.41       | 52901102    | 52921656  | 0.0246 | 0.1276 | 0.4574 | 3  | 5  | 0 |
| FBXL20       | 17 | 17q12          | 37416848    | 37557898  | 0.0246 | 0.1276 | 0.4574 | 3  | 9  | 0 |
| VPS18        | 15 | 15q15.1        | 41186628    | 41196172  | 0.0246 | 0.1276 | 0.4574 | 0  | 10 | 0 |
| PDZD8        | 10 | 10q25.3-q26.11 | 119042608   | 119134937 | 0.0246 | 0.1275 | 0.4576 | 3  | 7  | 0 |
| C18orf25     | 18 | 18q21.1        | 43753988    | 43846954  | 0.0245 | 0.1270 | 0.4578 | 5  | 9  | 0 |
| ECH1         | 19 | 19q13.2        | 39306068    | 39322497  | 0.0245 | 0.1270 | 0.4578 | 4  | 6  | 0 |
| B4GALT3      | 1  | 1q23.3         | 161141101   | 161147314 | 0.0244 | 0.1268 | 0.4580 | 19 | 0  | 2 |
| MOC53        | 20 | 20q13.13       | 49575363    | 49577820  | 0.0244 | 0.1268 | 0.4580 | 7  | 4  | 0 |
| C1orf50      | 1  | 1p34.2         | 43232916    | 43241418  | 0.0244 | 0.1268 | 0.4580 | 3  | 3  | 0 |
| TMEM86B      | 19 | 19q13.42       | 55738116    | 55740632  | 0.0244 | 0.1267 | 0.4581 | 3  | 6  | 0 |
| RNF6         | 13 | 13q12.13       | 26786905    | 26796508  | 0.0244 | 0.1266 | 0.4582 | 0  | 5  | 0 |
| KIAA1543     | 19 | 19p13.2        | 7660789     | 7683194   | 0.0243 | 0.1265 | 0.4582 | 0  | 5  | 0 |
| PNPLA6       | 19 | 19p13.2        | 7599043     | 7628652   | 0.0243 | 0.1265 | 0.4583 | 0  | 5  | 0 |
| SNX7         | 1  | 1p21.3         | 99127236    | 99226054  | 0.0243 | 0.1265 | 0.4583 | 5  | 6  | 0 |
| PSMD12       | 17 | 17q24.2        | 65336619    | 65362721  | 0.0243 | 0.1264 | 0.4583 | 6  | 2  | 0 |
| NXT1         | 20 | 20p11.21       | 23331373    | 23335408  | 0.0243 | 0.1263 | 0.4584 | 4  | 7  | 0 |
| TCTEX1D2     | 3  | 3q29           | 195975101   | 196045170 | 0.0243 | 0.1263 | 0.4584 | 10 | 2  | 0 |
| SLMO2        | 20 | 20q13.32       | 57608201    | 57617901  | 0.0243 | 0.1263 | 0.4584 | 9  | 5  | 0 |
| DERL3        | 22 | 22q11.23       | 24176690    | 24181199  | 0.0242 | 0.1263 | 0.4585 | 2  | 9  | 0 |
| SLC2A1       | 1  | 1p34.2         | 43391046    | 43424847  | 0.0242 | 0.1262 | 0.4585 | 3  | 3  | 0 |
| TXNDC11      | 16 | 16p13.13       | 11772943    | 11836704  | 0.0242 | 0.1262 | 0.4586 | 3  | 2  | 0 |
| C18orf1      | 18 | 18p11.21       | 13218786    | 13652753  | 0.0242 | 0.1262 | 0.4586 | 6  | 1  | 0 |
| CHAF1B       | 21 | 21q22.12       | 37757689    | 37789124  | 0.0242 | 0.1262 | 0.4586 | 6  | 4  | 0 |
| STAU2        | 8  | 8q21.11        | 74332608    | 74659075  | 0.0242 | 0.1262 | 0.4586 | 13 | 1  | 0 |
| CRSP9        | 5  | 5q33.3         | 156565453   | 156569921 | 0.0241 | 0.1259 | 0.4588 | 0  | 14 | 0 |
| ALG3         | 3  | 3q27.1         | 183960089   | 183967313 | 0.0241 | 0.1256 | 0.4590 | 12 | 1  | 0 |
| CYHR1        | 8  | 8q24.3         | 145675762   | 145691031 | 0.0240 | 0.1254 | 0.4591 | 16 | 1  | 0 |
| DFNB31       | 9  | 9q32           | 117164361   | 117267736 | 0.0240 | 0.1253 | 0.4592 | 5  | 8  | 0 |
| MVP          | 16 | 16p11.2        | 29831787    | 29859353  | 0.0240 | 0.1253 | 0.4592 | 1  | 2  | 0 |
| CAS21        | 1  | 1p36.22        | 10696661    | 10856707  | 0.0239 | 0.1251 | 0.4593 | 0  | 11 | 0 |
| MED10        | 5  | 5p15.31        | 6372040     | 6378639   | 0.0239 | 0.1251 | 0.4594 | 8  | 5  | 1 |
| HAT1         | 2  | 2q31.1         | 172778958   | 172848599 | 0.0239 | 0.1250 | 0.4594 | 7  | 3  | 0 |
| AGPAT6       | 8  | 8p11.21        | 41435707    | 41482520  | 0.0239 | 0.1250 | 0.4594 | 8  | 2  | 0 |
| KIAA0831     | 14 | 14q22.3        | 55833110    | 55878576  | 0.0239 | 0.1250 | 0.4595 | 2  | 9  | 0 |
| KIAA1310     | 2  | 2q11.2         | 97258909    | 97308524  | 0.0239 | 0.1250 | 0.4595 | 7  | 3  | 1 |
| WDR77        | 1  | 1p13.2         | 111981260   | 111991878 | 0.0239 | 0.1250 | 0.4595 | 4  | 5  | 0 |
| ER13         | 1  | 1p34.1         | 44686742    | 44620939  | 0.0238 | 0.1248 | 0.4596 | 3  | 3  | 0 |
| ANXA6        | 5  | 5q33.1         | 150480268   | 150537367 | 0.0238 | 0.1246 | 0.4598 | 0  | 14 | 0 |
| LSM14A       | 19 | 19q13.11       | 34863632    | 34720420  | 0.0238 | 0.1246 | 0.4598 | 3  | 2  | 0 |
| DAP3         | 1  | 1q22           | 155658974   | 155708317 | 0.0238 | 0.1246 | 0.4598 | 15 | 0  | 0 |
| POMGNT1      | 1  | 1p34.1         | 46654354    | 46685977  | 0.0238 | 0.1246 | 0.4598 | 3  | 4  | 0 |
| GPKOW        | 23 | 23p11.23       | 48970346    | 48980079  | 0.0238 | 0.1246 | 0.4599 | 2  | 13 | 0 |
| ATP11B       | 3  | 3q26.33        | 182511291   | 182639419 | 0.0238 | 0.1246 | 0.4599 | 12 | 1  | 1 |
| CCDC50       | 3  | 3q28           | 191046874   | 191116459 | 0.0238 | 0.1246 | 0.4599 | 11 | 0  | 0 |
| CTNND1       | 11 | 11q12.1        | 57529234    | 57586651  | 0.0237 | 0.1243 | 0.4600 | 6  | 2  | 0 |
| IFT20        | 17 | 17q11.2        | 26655353    | 26662495  | 0.0237 | 0.1243 | 0.4601 | 1  | 9  | 0 |
| C5orf43      | 5  | 5q12.1         | 60453540    | 60458302  | 0.0237 | 0.1243 | 0.4601 | 0  | 14 | 0 |
| FZD5         | 2  | 2q33.3         | 208627332   | 208634143 | 0.0236 | 0.1240 | 0.4603 | 2  | 3  | 0 |
| SUMF2        | 7  | 7p11.2         | 56131917    | 56148363  | 0.0236 | 0.1240 | 0.4603 | 3  | 2  | 0 |
| ZCCHC17      | 1  | 1p35.2         | 31769842    | 31837783  | 0.0236 | 0.1240 | 0.4603 | 2  | 10 | 0 |
| AC005921.3-2 | 17 | 17q21.33       | 48796964    | 48830070  | 0.0236 | 0.1238 | 0.4604 | 3  | 6  | 0 |
| TCF12        | 15 | 15q21.3        | 57210833    | 57580712  | 0.0236 | 0.1238 | 0.4604 | 1  | 4  | 0 |
| GLRA4        | 23 | 23q22.2        | 102962228   | 102983583 | 0.0235 | 0.1237 | 0.4605 | 2  | 13 | 0 |
| LXN          | 3  | 3q25.32        | 158384204   | 158390482 | 0.0235 | 0.1236 | 0.4606 | 15 | 0  | 1 |
| C11orf57     | 11 | 11q23.1        | 111944968   | 111955872 | 0.0235 | 0.1235 | 0.4607 | 5  | 2  | 0 |
| SYNE2        | 14 | 14q23.2        | 64319683    | 64693165  | 0.0235 | 0.1235 | 0.4607 | 1  | 9  | 0 |
| CA2          | 8  | 8q21.2         | 86376131    | 86393721  | 0.0235 | 0.1234 | 0.4608 | 11 | 1  | 1 |
| DDA1         | 19 | 19p13.11       | 17420337    | 17434094  | 0.0234 | 0.1233 | 0.4609 | 3  | 3  | 0 |
| PIGM         | 1  | 1q23.2         | 159997462   | 160001783 | 0.0234 | 0.1233 | 0.4609 | 20 | 1  | 4 |
| C17orf85     | 17 | 17p13.2        | 3714460     | 3749540   | 0.0234 | 0.1231 | 0.4610 | 0  | 10 | 0 |
| NGFR         | 17 | 17q21.33       | 47572655    | 47592357  | 0.0234 | 0.1230 | 0.4610 | 1  | 7  | 0 |
| ZDHHC20      | 13 | 13q12.11       | 21950263    | 22033509  | 0.0233 | 0.1230 | 0.4611 | 2  | 2  | 0 |
| PHC3         | 3  | 3q26.2         | 169805368   | 169899537 | 0.0233 | 0.1229 | 0.4611 | 15 | 0  | 1 |
| MAP2K5       | 15 | 15q23          | 67835021    | 68094552  | 0.0233 | 0.1229 | 0.4612 | 4  | 4  | 0 |
| LRBA         | 4  | 4q31.3         | 151185594   | 151936879 | 0.0233 | 0.1229 | 0.4612 | 1  | 8  | 0 |
| PPCS         | 1  | 1p34.2         | 42921788    | 42926086  | 0.0233 | 0.1227 | 0.4613 | 5  | 1  | 0 |
| PCBD1        | 6  | 6p22.1         | 282494349</ |           |        |        |        |    |    |   |

Supplementary Table 6  
Page 10

|            |    |                 |           |           |        |        |        |    |    |   |
|------------|----|-----------------|-----------|-----------|--------|--------|--------|----|----|---|
| FAM54A     | 6  | 8q23.3          | 136552168 | 136571462 | 0.0221 | 0.1187 | 0.4649 | 8  | 3  | 1 |
| REEP5      | 5  | 5q22.2          | 112212081 | 112258031 | 0.0221 | 0.1187 | 0.4649 | 0  | 13 | 0 |
| OSM        | 22 | 22q12.2         | 30658821  | 30662840  | 0.0221 | 0.1187 | 0.4649 | 2  | 7  | 0 |
| TARDBP     | 1  | 1p36.22         | 11072679  | 11085546  | 0.0221 | 0.1186 | 0.4650 | 0  | 11 | 0 |
| BMP15      | 23 | 23p11.22        | 50653735  | 50659641  | 0.0220 | 0.1185 | 0.4650 | 3  | 12 | 1 |
| ARSD       | 23 | 23p22.33        | 2822011   | 2847392   | 0.0220 | 0.1183 | 0.4651 | 4  | 13 | 0 |
| MRPS22     | 3  | 3q23            | 139062861 | 139075888 | 0.0220 | 0.1183 | 0.4652 | 11 | 0  | 0 |
| RAB3GAP2   | 1  | 1q41            | 220321610 | 220445843 | 0.0220 | 0.1183 | 0.4652 | 16 | 1  | 1 |
| AC004381.6 | 16 | 16p12.3         | 20817767  | 20860989  | 0.0220 | 0.1183 | 0.4652 | 1  | 4  | 0 |
| HAVCR2     | 5  | 5q33.3          | 156512843 | 156536138 | 0.0220 | 0.1183 | 0.4652 | 0  | 14 | 0 |
| PCOLCE2    | 3  | 3q23            | 142536717 | 142608041 | 0.0219 | 0.1182 | 0.4653 | 15 | 1  | 0 |
| STX8       | 17 | 17p13.1         | 9153789   | 9479275   | 0.0219 | 0.1182 | 0.4653 | 0  | 16 | 0 |
| VLDLR      | 9  | 9p24.2          | 2621793   | 2654485   | 0.0219 | 0.1182 | 0.4654 | 6  | 10 | 0 |
| LRRRC41    | 1  | 1p34.1          | 46744073  | 46769038  | 0.0219 | 0.1182 | 0.4654 | 3  | 4  | 0 |
| AK1        | 9  | 9q34.11         | 130628759 | 130640022 | 0.0219 | 0.1182 | 0.4654 | 3  | 7  | 0 |
| POLR1D     | 13 | 13q12.2         | 28194903  | 28241547  | 0.0219 | 0.1182 | 0.4654 | 0  | 4  | 0 |
| RPL28      | 19 | 19q13.42        | 55897300  | 55903449  | 0.0219 | 0.1182 | 0.4654 | 3  | 6  | 0 |
| ARMC7      | 17 | 17q25.1         | 73106082  | 73126360  | 0.0219 | 0.1182 | 0.4654 | 6  | 3  | 0 |
| C5orf51    | 5  | 5p13.1          | 41904470  | 41921737  | 0.0219 | 0.1179 | 0.4656 | 5  | 5  | 0 |
| AES        | 19 | 19p13.3         | 3052908   | 3062964   | 0.0218 | 0.1178 | 0.4657 | 0  | 6  | 0 |
| SFRS6      | 20 | 20q13.11        | 42086504  | 42092242  | 0.0218 | 0.1177 | 0.4658 | 2  | 9  | 0 |
| RABEPK     | 9  | 9q33.3          | 127962824 | 127996437 | 0.0218 | 0.1177 | 0.4658 | 1  | 7  | 0 |
| TMX2       | 11 | 11q12.1         | 57480042  | 57508444  | 0.0218 | 0.1177 | 0.4658 | 6  | 2  | 0 |
| ATP7B      | 13 | 13q14.3         | 52506810  | 52585630  | 0.0218 | 0.1176 | 0.4659 | 2  | 6  | 0 |
| S100A10    | 1  | 1q21.3          | 151955387 | 151966714 | 0.0218 | 0.1176 | 0.4659 | 17 | 1  | 1 |
| LRRC47     | 1  | 1p36.32         | 3696784   | 3713068   | 0.0217 | 0.1176 | 0.4660 | 3  | 13 | 0 |
| TMEM59     | 1  | 1p32.3          | 54497347  | 54519177  | 0.0217 | 0.1176 | 0.4660 | 6  | 7  | 0 |
| AKAP1      | 17 | 17q22           | 55162553  | 55198710  | 0.0217 | 0.1176 | 0.4660 | 6  | 6  | 0 |
| EPMA2      | 6  | 6q24.3          | 145822719 | 146086991 | 0.0217 | 0.1175 | 0.4661 | 6  | 6  | 1 |
| BCCIP      | 10 | 10q26.2         | 127512104 | 127542263 | 0.0217 | 0.1174 | 0.4662 | 4  | 9  | 0 |
| C16orf45   | 16 | 16p13.11        | 15528325  | 15682116  | 0.0216 | 0.1172 | 0.4663 | 4  | 2  | 0 |
| SET        | 9  | 9q34.11         | 131445703 | 131458674 | 0.0216 | 0.1172 | 0.4663 | 3  | 7  | 0 |
| SIK2       | 11 | 11q23.1         | 111473170 | 111597630 | 0.0216 | 0.1171 | 0.4664 | 5  | 2  | 0 |
| C19orf61   | 19 | 19q13.31        | 44235301  | 44259142  | 0.0216 | 0.1171 | 0.4664 | 3  | 7  | 0 |
| RPRD1A     | 18 | 18q12.2         | 33569794  | 33647519  | 0.0216 | 0.1170 | 0.4665 | 7  | 9  | 0 |
| ZFP41      | 8  | 8q24.3          | 144329109 | 144359099 | 0.0216 | 0.1170 | 0.4665 | 14 | 1  | 0 |
| EXOSC8     | 13 | 13q13.3         | 37574678  | 37583538  | 0.0216 | 0.1169 | 0.4665 | 1  | 4  | 0 |
| LNX1       | 4  | 4q12            | 54325468  | 54457724  | 0.0215 | 0.1169 | 0.4666 | 4  | 7  | 0 |
| STK40      | 1  | 1p34.3          | 36805225  | 36851497  | 0.0215 | 0.1169 | 0.4666 | 0  | 6  | 0 |
| MTMR6      | 13 | 13q12.13        | 25820343  | 25861704  | 0.0215 | 0.1168 | 0.4667 | 0  | 5  | 0 |
| STARD7     | 2  | 2q11.2          | 96850607  | 96874573  | 0.0215 | 0.1168 | 0.4667 | 7  | 4  | 1 |
| SLC27A5    | 19 | 19q13.43        | 59009704  | 59023432  | 0.0215 | 0.1168 | 0.4667 | 2  | 5  | 0 |
| CTCF       | 16 | 16q22.1         | 67596310  | 67673086  | 0.0215 | 0.1168 | 0.4667 | 6  | 7  | 0 |
| EPB41L2    | 6  | 6q23.1-q23.2    | 131160487 | 131384462 | 0.0215 | 0.1167 | 0.4668 | 8  | 3  | 1 |
| PDE5A      | 4  | 4q26            | 120415552 | 120549981 | 0.0215 | 0.1167 | 0.4668 | 3  | 3  | 0 |
| LIN7B      | 19 | 19q13.33        | 49617618  | 49621717  | 0.0214 | 0.1166 | 0.4669 | 3  | 7  | 0 |
| OGG1       | 3  | 3p25.3          | 9791628   | 9829903   | 0.0214 | 0.1165 | 0.4670 | 7  | 2  | 0 |
| TMF1       | 3  | 3p14.1          | 69068980  | 69101484  | 0.0214 | 0.1165 | 0.4670 | 2  | 8  | 0 |
| ZNF2       | 2  | 2q11.1          | 95831183  | 95850065  | 0.0214 | 0.1165 | 0.4670 | 6  | 3  | 1 |
| PLAA       | 9  | 9p21.2          | 26903368  | 26947468  | 0.0214 | 0.1165 | 0.4670 | 4  | 11 | 0 |
| NUB1       | 7  | 7q36.1          | 151038858 | 151075530 | 0.0214 | 0.1165 | 0.4671 | 13 | 1  | 0 |
| COX15      | 10 | 10q24.2         | 101468505 | 101492423 | 0.0214 | 0.1165 | 0.4671 | 1  | 10 | 0 |
| EPN1       | 19 | 19q13.42        | 56186561  | 56207132  | 0.0214 | 0.1165 | 0.4671 | 3  | 6  | 0 |
| ACAT2      | 6  | 6q25.3          | 160182989 | 160200085 | 0.0214 | 0.1164 | 0.4672 | 2  | 6  | 0 |
| DCUN1D5    | 11 | 11q22.3         | 102932822 | 102962869 | 0.0214 | 0.1164 | 0.4672 | 4  | 4  | 0 |
| PTPN4      | 2  | 2q14.2          | 120517207 | 120735037 | 0.0213 | 0.1164 | 0.4672 | 5  | 7  | 0 |
| KIAA1967   | 8  | 8p21.3          | 22462257  | 22477975  | 0.0213 | 0.1164 | 0.4672 | 0  | 13 | 0 |
| RDIH13     | 19 | 19q13.42        | 55555711  | 55580897  | 0.0213 | 0.1164 | 0.4672 | 3  | 8  | 0 |
| NFATC3     | 16 | 16q22.1         | 68119375  | 68260800  | 0.0213 | 0.1164 | 0.4672 | 6  | 6  | 0 |
| SFXN1      | 5  | 5q35.2          | 174905514 | 174955621 | 0.0213 | 0.1163 | 0.4673 | 2  | 9  | 0 |
| USP40      | 2  | 2q37.1          | 234384166 | 234474236 | 0.0213 | 0.1163 | 0.4673 | 2  | 10 | 0 |
| POLE       | 12 | 12q24.33        | 133200348 | 133263945 | 0.0213 | 0.1161 | 0.4674 | 1  | 6  | 0 |
| MSTN       | 2  | 2q32.2          | 190920429 | 190927455 | 0.0213 | 0.1161 | 0.4674 | 5  | 2  | 0 |
| FAM113A    | 20 | 20p13           | 2815960   | 2821836   | 0.0213 | 0.1161 | 0.4675 | 2  | 7  | 0 |
| UBE2B      | 5  | 5q31.1          | 133706870 | 133727799 | 0.0212 | 0.1161 | 0.4675 | 0  | 13 | 0 |
| PRKCB      | 16 | 16p12.2-p12.1   | 23847300  | 24231932  | 0.0212 | 0.1160 | 0.4676 | 0  | 4  | 0 |
| MARS       | 12 | 12q13.3         | 57881851  | 57910433  | 0.0212 | 0.1160 | 0.4676 | 1  | 8  | 0 |
| GGH        | 8  | 8q12.3          | 63927643  | 63951610  | 0.0212 | 0.1159 | 0.4677 | 16 | 1  | 0 |
| KPNA6      | 1  | 1p35.1          | 32573644  | 32642169  | 0.0212 | 0.1159 | 0.4677 | 2  | 9  | 0 |
| HSD17B12   | 11 | 11p11.2         | 43702143  | 43878160  | 0.0212 | 0.1159 | 0.4677 | 5  | 3  | 0 |
| S100BPB    | 1  | 1p35.1          | 33283043  | 33324475  | 0.0212 | 0.1159 | 0.4677 | 2  | 8  | 0 |
| SCN1A      | 2  | 2q24.3          | 166845670 | 166984523 | 0.0212 | 0.1159 | 0.4677 | 4  | 4  | 0 |
| COG3       | 13 | 13q14.13        | 46039071  | 46110759  | 0.0211 | 0.1157 | 0.4679 | 2  | 7  | 0 |
| ATG3       | 3  | 3q13.2          | 112251360 | 112280763 | 0.0211 | 0.1157 | 0.4679 | 7  | 1  | 0 |
| ILF2       | 1  | 1q21.3          | 153634515 | 153643479 | 0.0211 | 0.1157 | 0.4679 | 16 | 1  | 1 |
| TMEM66     | 8  | 8p12            | 29920642  | 29940649  | 0.0211 | 0.1156 | 0.4680 | 2  | 12 | 0 |
| MAN2A1     | 5  | 5q21.3          | 109025156 | 109203429 | 0.0211 | 0.1156 | 0.4680 | 0  | 13 | 0 |
| ZNF155     | 19 | 19q13.31        | 44488355  | 44502477  | 0.0211 | 0.1155 | 0.4681 | 3  | 7  | 0 |
| POGZ       | 1  | 1q21.3          | 151375200 | 151431941 | 0.0211 | 0.1155 | 0.4681 | 16 | 1  | 0 |
| CUL2       | 10 | 10p11.21        | 35297479  | 35379570  | 0.0211 | 0.1155 | 0.4681 | 12 | 1  | 0 |
| ACSS2      | 20 | 20q11.22        | 33462745  | 33515762  | 0.0210 | 0.1154 | 0.4682 | 0  | 5  | 0 |
| C1orf43    | 1  | 1q21.3          | 154179183 | 154193273 | 0.0210 | 0.1153 | 0.4683 | 15 | 0  | 0 |
| YOD1       | 1  | 1q32.2          | 207217194 | 207226325 | 0.0210 | 0.1152 | 0.4684 | 16 | 1  | 1 |
| DNMWD      | 19 | 19q13.32        | 46286264  | 46296060  | 0.0210 | 0.1152 | 0.4684 | 3  | 9  | 0 |
| SNRK       | 3  | 3p22.1          | 43328004  | 43392630  | 0.0210 | 0.1152 | 0.4684 | 1  | 9  | 0 |
| AC06875.52 | 12 | 12p13.2         | 10858502  | 10675733  | 0.0209 | 0.1151 | 0.4685 | 7  | 4  | 0 |
| IDH1       | 2  | 2q34            | 209109553 | 209130798 | 0.0209 | 0.1148 | 0.4687 | 2  | 3  | 0 |
| AKR1A1     | 1  | 1p34.1          | 46016215  | 46035721  | 0.0209 | 0.1148 | 0.4687 | 3  | 3  | 0 |
| KTEL1      | 3  | 3q13.33         | 119187785 | 119213550 | 0.0209 | 0.1148 | 0.4688 | 5  | 4  | 0 |
| TRADD      | 16 | 16q22.1         | 67188093  | 67193812  | 0.0208 | 0.1147 | 0.4689 | 7  | 7  | 0 |
| TMEM54     | 1  | 1p35.1          | 33360196  | 33376685  | 0.0208 | 0.1147 | 0.4689 | 2  | 8  | 0 |
| MIPOL1     | 14 | 14q13.3-q21.1   | 37667156  | 38020463  | 0.0208 | 0.1147 | 0.4689 | 2  | 6  | 0 |
| ALB        | 4  | 4q13.3          | 74262831  | 74287127  | 0.0208 | 0.1146 | 0.4689 | 5  | 3  | 0 |
| ZNF596     | 8  | 8p23.3          | 182200    | 197332    | 0.0208 | 0.1146 | 0.4689 | 2  | 7  | 0 |
| MAP4       | 3  | 3p21.31         | 47892182  | 48130769  | 0.0208 | 0.1146 | 0.4689 | 0  | 8  | 0 |
| PRKCD      | 3  | 3p21.1          | 53195223  | 53226731  | 0.0208 | 0.1146 | 0.4690 | 0  | 11 | 0 |
| CDC42      | 1  | 1p36.12         | 22379120  | 22419437  | 0.0208 | 0.1146 | 0.4690 | 0  | 14 | 0 |
| ZMIZ2      | 7  | 7p13            | 44788180  | 44809477  | 0.0208 | 0.1146 | 0.4690 | 1  | 6  | 0 |
| RPS5       | 19 | 19q13.43        | 58898636  | 58906170  | 0.0208 | 0.1146 | 0.4690 | 3  | 5  | 0 |
| ERC1       | 12 | 12p13.33        | 1100404   | 1605099   | 0.0208 | 0.1146 | 0.4691 | 15 | 2  | 2 |
| APITD1     | 1  | 1p36.22         | 10490159  | 10512210  | 0.0207 | 0.1145 | 0.4691 | 0  | 11 | 0 |
| ZNF569     | 19 | 19q13.12        | 37902062  | 37960165  | 0.0207 | 0.1145 | 0.4691 | 5  | 3  | 1 |
| TAOK2      | 16 | 16p11.2         | 29985222  | 30003581  | 0.0207 | 0.1145 | 0.4692 | 2  | 2  | 0 |
| MASTL      | 10 | 10p12.1         | 27443717  | 27475848  | 0.0207 | 0.1145 | 0.4692 | 12 | 2  | 0 |
| NIPSNAP3B  | 9  | 9q31.1          | 107526451 | 107536290 | 0.0207 | 0.1145 | 0.4692 | 2  | 6  | 0 |
| STARD3     | 17 | 17q12           | 37793412  | 37819722  | 0.0207 | 0.1145 | 0.4692 | 3  | 9  | 0 |
| FAM76B     | 11 | 11q21           | 95502106  | 95522954  | 0.0207 | 0.1144 | 0.4693 | 5  | 3  | 0 |
| C13orf3    | 13 | 13q12.11        | 21727734  | 21750710  | 0.0207 | 0.1144 | 0.4693 | 2  | 2  | 0 |
| RAD54L     | 1  | 1p34.1          | 46713367  | 46744145  | 0.0207 | 0.1144 | 0.4693 | 3  | 4  | 0 |
| TRMT61A    | 14 | 14q32.32-q32.33 | 103995509 | 104003408 | 0.0206 | 0.1142 | 0.4695 | 1  | 8  | 0 |
| KIAA1468   | 18 | 18q21.33        | 59854524  | 59974354  | 0.0206 | 0.1142 | 0.4695 | 6  | 8  | 0 |
| CHD1L      | 1  | 1q21.1          | 146714291 | 146767441 | 0.0206 | 0.1142 | 0.4695 | 18 | 1  | 0 |
| ASMTL      | 23 | 23p22.33        | 15220332  | 15718444  | 0.0206 | 0.1142 | 0.4695 | 3  | 12 | 0 |
| EMP1       | 12 | 12p13.1         | 133493602 | 13369708  | 0.0206 |        |        |    |    |   |

Supplementary Table 6  
Page 11

|              |    |                |           |           |        |        |        |    |    |   |
|--------------|----|----------------|-----------|-----------|--------|--------|--------|----|----|---|
| SHF          | 15 | 15q21.1        | 45459411  | 45493373  | 0.0193 | 0.1093 | 0.4739 | 1  | 9  | 0 |
| AC011597.27  | 3  | 3q22.3         | 136617909 | 136618918 | 0.0193 | 0.1093 | 0.4739 | 7  | 0  | 0 |
| LRRCD        | 1  | 1p22.2         | 90286573  | 90401982  | 0.0193 | 0.1093 | 0.4739 | 6  | 7  | 0 |
| SLC30A9      | 4  | 4p13           | 41992523  | 42089550  | 0.0193 | 0.1092 | 0.4739 | 2  | 11 | 0 |
| SNRPC        | 6  | 6p21.31        | 34725297  | 34741567  | 0.0193 | 0.1092 | 0.4740 | 9  | 0  | 0 |
| KLHL23       | 2  | 2q31.1         | 170551001 | 170633499 | 0.0193 | 0.1090 | 0.4741 | 6  | 4  | 0 |
| ANKRD26      | 10 | 10p12.1        | 27280843  | 27389427  | 0.0192 | 0.1087 | 0.4743 | 12 | 2  | 0 |
| SFI1         | 22 | 22q12.2        | 31892261  | 32014572  | 0.0192 | 0.1087 | 0.4744 | 1  | 8  | 0 |
| ARF4         | 3  | 3p14.3         | 57557092  | 57583215  | 0.0192 | 0.1087 | 0.4744 | 0  | 10 | 0 |
| MYL12B       | 18 | 18p11.31       | 3262111   | 3278282   | 0.0192 | 0.1087 | 0.4744 | 6  | 5  | 0 |
| TTC30B       | 2  | 2q31.2         | 178414973 | 178417742 | 0.0192 | 0.1086 | 0.4745 | 5  | 3  | 0 |
| SKIL         | 3  | 3q26.2         | 170075473 | 170110948 | 0.0192 | 0.1086 | 0.4745 | 15 | 0  | 1 |
| IRF6         | 1  | 1q32.2         | 209961262 | 209979479 | 0.0192 | 0.1086 | 0.4745 | 17 | 3  | 0 |
| SNX3         | 6  | 6q21           | 108532717 | 108582464 | 0.0192 | 0.1086 | 0.4745 | 8  | 2  | 0 |
| EIF2AK4      | 15 | 15q15.1        | 40226347  | 40327797  | 0.0191 | 0.1085 | 0.4746 | 0  | 8  | 0 |
| LINS1        | 15 | 15q26.3        | 101109435 | 101142404 | 0.0191 | 0.1085 | 0.4746 | 13 | 2  | 0 |
| STK31        | 7  | 7p15.3         | 23749814  | 23872132  | 0.0191 | 0.1084 | 0.4747 | 4  | 5  | 0 |
| SMARCA2      | 9  | 9p24.3         | 2015342   | 2193624   | 0.0191 | 0.1084 | 0.4747 | 7  | 10 | 0 |
| GNB4         | 3  | 3q26.33        | 179113876 | 179169371 | 0.0191 | 0.1084 | 0.4747 | 16 | 0  | 0 |
| GLRX5        | 14 | 14q32.13       | 96001323  | 96011055  | 0.0191 | 0.1084 | 0.4748 | 4  | 10 | 0 |
| KCNH3        | 12 | 12q13.12       | 49932940  | 49952059  | 0.0190 | 0.1083 | 0.4748 | 0  | 8  | 0 |
| MCART6       | 23 | 23q22.2        | 103343899 | 103401708 | 0.0190 | 0.1080 | 0.4751 | 2  | 13 | 0 |
| CDCA3        | 12 | 12p13.31       | 6957972   | 6960456   | 0.0190 | 0.1079 | 0.4751 | 12 | 3  | 0 |
| MYCBP        | 1  | 1p34.3         | 39328634  | 39339050  | 0.0190 | 0.1079 | 0.4752 | 0  | 5  | 0 |
| CDC42EP4     | 17 | 17q25.1        | 71279764  | 71308143  | 0.0190 | 0.1079 | 0.4752 | 9  | 3  | 0 |
| C14orf83     | 14 | 14q24.1        | 67913801  | 67982202  | 0.0189 | 0.1079 | 0.4752 | 1  | 10 | 0 |
| ELAVL1       | 19 | 19p13.2        | 8023458   | 8070529   | 0.0189 | 0.1079 | 0.4752 | 1  | 5  | 0 |
| C2orf42      | 2  | 2p13.3         | 70377019  | 70418151  | 0.0189 | 0.1079 | 0.4753 | 4  | 0  | 0 |
| CTDS2P2      | 12 | 12p14.1        | 58213712  | 58240747  | 0.0189 | 0.1079 | 0.4753 | 2  | 8  | 0 |
| GOLGA3       | 12 | 12q24.33       | 133345495 | 133405288 | 0.0189 | 0.1079 | 0.4753 | 1  | 6  | 0 |
| RNPEP        | 1  | 1q32.1         | 201951766 | 201975262 | 0.0189 | 0.1079 | 0.4753 | 14 | 1  | 0 |
| DOPEY1       | 6  | 6q14.1         | 83777385  | 83878190  | 0.0189 | 0.1079 | 0.4753 | 7  | 2  | 0 |
| CCDC126      | 7  | 7p15.3         | 23636998  | 23684327  | 0.0189 | 0.1079 | 0.4753 | 4  | 5  | 0 |
| NEDD9        | 6  | 6p24.2         | 11183534  | 11382581  | 0.0189 | 0.1079 | 0.4753 | 10 | 3  | 0 |
| CPN2         | 3  | 3q29           | 194060494 | 194072057 | 0.0189 | 0.1078 | 0.4754 | 12 | 2  | 0 |
| C9orf156     | 9  | 9q22.33        | 100666772 | 100684852 | 0.0189 | 0.1077 | 0.4755 | 3  | 8  | 0 |
| NDUFA1       | 23 | 23q24          | 119005734 | 119010603 | 0.0188 | 0.1077 | 0.4755 | 2  | 11 | 0 |
| UBA3         | 3  | 3p14.1         | 69103881  | 69129532  | 0.0188 | 0.1077 | 0.4755 | 2  | 8  | 0 |
| UCHL1        | 4  | 4p13           | 41258928  | 41270445  | 0.0188 | 0.1075 | 0.4756 | 1  | 12 | 0 |
| UBTF         | 17 | 17q21.31       | 42282402  | 42298250  | 0.0188 | 0.1075 | 0.4757 | 1  | 11 | 0 |
| RAB9A        | 23 | 23p22.2        | 13707341  | 13727760  | 0.0188 | 0.1075 | 0.4757 | 5  | 10 | 0 |
| ZNF146       | 19 | 19q13.12       | 36705504  | 36729673  | 0.0188 | 0.1073 | 0.4758 | 5  | 1  | 0 |
| CYTH2        | 19 | 19q13.33       | 48972465  | 48985571  | 0.0188 | 0.1073 | 0.4758 | 3  | 7  | 0 |
| RPAP1        | 15 | 15q15.1        | 41809377  | 41836464  | 0.0187 | 0.1072 | 0.4759 | 0  | 10 | 0 |
| RUNDC3B      | 7  | 7q21.12        | 87257729  | 87461613  | 0.0187 | 0.1072 | 0.4760 | 8  | 0  | 0 |
| APOF         | 12 | 12q13.3        | 56754386  | 56756607  | 0.0187 | 0.1072 | 0.4760 | 1  | 7  | 0 |
| NUP35        | 2  | 2q32.1         | 183982242 | 184026405 | 0.0187 | 0.1071 | 0.4761 | 6  | 2  | 0 |
| HECTD1       | 14 | 14q12          | 31569324  | 31676689  | 0.0187 | 0.1071 | 0.4761 | 4  | 4  | 0 |
| TMEM74       | 8  | 8q23.1         | 109795346 | 109799770 | 0.0187 | 0.1071 | 0.4761 | 18 | 0  | 2 |
| C10orf18     | 10 | 10p15.1        | 5726801   | 5806943   | 0.0187 | 0.1069 | 0.4762 | 15 | 0  | 1 |
| C8orf38      | 8  | 8q22.1         | 95908041  | 96087923  | 0.0186 | 0.1069 | 0.4762 | 14 | 0  | 2 |
| PDZRN3       | 3  | 3p13           | 73431652  | 73674074  | 0.0186 | 0.1069 | 0.4763 | 3  | 6  | 0 |
| PSMA7        | 20 | 20q13.33       | 60711791  | 60718474  | 0.0186 | 0.1068 | 0.4763 | 7  | 7  | 0 |
| MYO6         | 6  | 6q14.1         | 76458909  | 76629254  | 0.0186 | 0.1067 | 0.4764 | 7  | 1  | 0 |
| SORBS2       | 4  | 4q35.1         | 186506598 | 186877570 | 0.0186 | 0.1067 | 0.4764 | 3  | 10 | 0 |
| VRK1         | 14 | 14q32.2        | 97263684  | 97347950  | 0.0186 | 0.1067 | 0.4764 | 3  | 12 | 0 |
| RHOA         | 1  | 1p13.2         | 113243749 | 113250025 | 0.0186 | 0.1067 | 0.4765 | 5  | 5  | 0 |
| MKS1         | 17 | 17q22          | 56282799  | 56286656  | 0.0186 | 0.1067 | 0.4765 | 7  | 4  | 0 |
| CNIH         | 14 | 14q22.2        | 54893647  | 54908148  | 0.0186 | 0.1067 | 0.4765 | 2  | 9  | 0 |
| SEPT7        | 7  | 7p14.2         | 35840542  | 35944917  | 0.0185 | 0.1067 | 0.4766 | 3  | 9  | 0 |
| KLHL9        | 9  | 9p21.3         | 21331018  | 21335429  | 0.0185 | 0.1066 | 0.4766 | 5  | 10 | 0 |
| ZBTB47       | 3  | 3p22.1         | 42695176  | 42709072  | 0.0185 | 0.1065 | 0.4767 | 3  | 7  | 0 |
| RP11-18B16.1 | 9  | 9q32           | 116521277 | 116521699 | 0.0185 | 0.1064 | 0.4768 | 4  | 8  | 0 |
| C5orf22      | 5  | 5p13.3         | 31532373  | 31555154  | 0.0185 | 0.1064 | 0.4768 | 8  | 4  | 0 |
| MTERFD3      | 12 | 12q23.3        | 107371069 | 107380929 | 0.0185 | 0.1064 | 0.4768 | 3  | 9  | 0 |
| UROS         | 10 | 10q26.13-q26.2 | 127477148 | 127511837 | 0.0185 | 0.1064 | 0.4768 | 4  | 9  | 0 |
| EGFR         | 7  | 7p11.2         | 55086714  | 55324313  | 0.0184 | 0.1062 | 0.4770 | 3  | 3  | 1 |
| ADPRHL2      | 1  | 1p34.3         | 36554486  | 36559532  | 0.0184 | 0.1062 | 0.4770 | 0  | 5  | 0 |
| SEC13L1      | 3  | 3p25.3         | 10342615  | 10362855  | 0.0184 | 0.1060 | 0.4771 | 6  | 2  | 0 |
| C17orf53     | 17 | 17q21.31       | 42219326  | 42239844  | 0.0184 | 0.1060 | 0.4772 | 1  | 11 | 0 |
| DDC          | 7  | 7p12.1         | 50526136  | 50633154  | 0.0184 | 0.1059 | 0.4772 | 4  | 7  | 0 |
| RAB24        | 5  | 5q35.3         | 176728199 | 176730744 | 0.0184 | 0.1059 | 0.4772 | 4  | 6  | 0 |
| NHP2         | 5  | 5q35.3         | 177576468 | 177580961 | 0.0184 | 0.1059 | 0.4772 | 5  | 5  | 0 |
| FDFT1        | 8  | 8p23.1         | 11660190  | 11696817  | 0.0183 | 0.1059 | 0.4773 | 1  | 12 | 0 |
| ELK4         | 1  | 1q32.1         | 205585237 | 205602000 | 0.0183 | 0.1059 | 0.4773 | 16 | 1  | 0 |
| AP1S1        | 7  | 7q22.1         | 100797686 | 100804877 | 0.0183 | 0.1059 | 0.4773 | 3  | 4  | 0 |
| ANP32E       | 1  | 1q21.2         | 150190718 | 150208504 | 0.0183 | 0.1059 | 0.4774 | 15 | 1  | 0 |
| ELP3         | 8  | 8p21.1         | 27950584  | 28048665  | 0.0183 | 0.1059 | 0.4774 | 1  | 13 | 0 |
| TJP1         | 15 | 15q13.1        | 29991571  | 30114706  | 0.0183 | 0.1059 | 0.4774 | 0  | 8  | 0 |
| PNKD         | 2  | 2q35           | 219135115 | 219211512 | 0.0182 | 0.1055 | 0.4777 | 2  | 7  | 0 |
| SLC37A3      | 7  | 7q34           | 140033554 | 140098311 | 0.0182 | 0.1055 | 0.4777 | 9  | 0  | 0 |
| ZNF746       | 7  | 7q36.1         | 149169887 | 149194794 | 0.0182 | 0.1055 | 0.4777 | 11 | 1  | 0 |
| LRSAM1       | 9  | 9q33.3         | 130213792 | 130265778 | 0.0182 | 0.1054 | 0.4778 | 3  | 7  | 0 |
| UBE2D3       | 4  | 4q24           | 103717134 | 103790032 | 0.0182 | 0.1054 | 0.4778 | 2  | 4  | 0 |
| MFAP5        | 12 | 12p13.31       | 8798540   | 8815433   | 0.0182 | 0.1054 | 0.4778 | 9  | 3  | 0 |
| KIF18A       | 11 | 11p14.1        | 28129746  | 28129746  | 0.0182 | 0.1054 | 0.4778 | 5  | 2  | 0 |
| ANKRD5       | 20 | 20p12.2        | 9966736   | 10037405  | 0.0182 | 0.1053 | 0.4779 | 3  | 7  | 1 |
| GLMN         | 1  | 1p22.1         | 82711957  | 92764566  | 0.0182 | 0.1053 | 0.4779 | 5  | 8  | 0 |
| DDIT4L       | 4  | 4q24           | 101107029 | 101111625 | 0.0182 | 0.1052 | 0.4780 | 3  | 4  | 0 |
| ABCC1        | 16 | 16p13.11       | 16043434  | 16236931  | 0.0181 | 0.1052 | 0.4780 | 4  | 2  | 0 |
| TNK2         | 3  | 3q29           | 195590235 | 195635880 | 0.0181 | 0.1052 | 0.4780 | 11 | 2  | 0 |
| NUS1         | 6  | 6q22.1         | 117996617 | 118031884 | 0.0181 | 0.1052 | 0.4781 | 6  | 2  | 0 |
| GRHPR        | 9  | 9p13.2         | 37422707  | 37436986  | 0.0181 | 0.1052 | 0.4781 | 6  | 9  | 0 |
| RAB14        | 9  | 9q33.2         | 123940416 | 123985292 | 0.0181 | 0.1052 | 0.4781 | 3  | 7  | 0 |
| SHPRH        | 6  | 6q24.3         | 146185381 | 146285559 | 0.0181 | 0.1052 | 0.4781 | 6  | 6  | 1 |
| ARPC4        | 3  | 3p25.3         | 9834227   | 9896822   | 0.0181 | 0.1051 | 0.4782 | 7  | 2  | 0 |
| BAZ1A        | 14 | 14q13.1-q13.2  | 35221938  | 35344853  | 0.0181 | 0.1051 | 0.4782 | 3  | 4  | 0 |
| HMBOX1       | 8  | 8p21.1-p12     | 28747911  | 28910787  | 0.0181 | 0.1051 | 0.4782 | 2  | 12 | 0 |
| SETD1B       | 12 | 12q24.31       | 122242638 | 122270562 | 0.0181 | 0.1050 | 0.4783 | 2  | 6  | 0 |
| SGSH         | 17 | 17q25.3        | 78183079  | 78194199  | 0.0181 | 0.1050 | 0.4783 | 12 | 3  | 0 |
| ATP6V0E      | 5  | 5q35.1         | 172410763 | 172461900 | 0.0181 | 0.1050 | 0.4783 | 1  | 12 | 0 |
| ZNF691       | 1  | 1p34.2         | 43312280  | 43318148  | 0.0180 | 0.1048 | 0.4785 | 3  | 3  | 0 |
| SOC5A        | 14 | 14q22.2-q22.3  | 55493844  | 55516204  | 0.0180 | 0.1046 | 0.4786 | 2  | 9  | 0 |
| UBE2D1       | 10 | 10q21.1        | 60094739  | 60130509  | 0.0180 | 0.1046 | 0.4786 | 3  | 1  | 0 |
| CHGB         | 20 | 20p12.3        | 5891974   | 5906003   | 0.0180 | 0.1045 | 0.4787 | 3  | 7  | 0 |
| FBXL12       | 19 | 19p13.2        | 9920947   | 9929731   | 0.0180 | 0.1045 | 0.4787 | 3  | 4  | 0 |
| LGR4         | 11 | 11p14.1        | 27387508  | 27494334  | 0.0179 | 0.1045 | 0.4788 | 5  | 2  | 0 |
| CYB5R3       | 22 | 22q13.2        | 43014814  | 43045405  | 0.0179 | 0.1042 | 0.4790 | 2  | 6  | 0 |
| TLL11        | 9  | 9q33.2         | 124584207 | 124855885 | 0.0179 | 0.1042 | 0.4790 | 2  | 8  | 0 |
| PPM1A        | 14 | 14q23.1        | 60712470  | 60765801  | 0.0179 | 0.1042 | 0.4790 | 2  | 9  | 0 |
| GZE3         | 14 | 14q12          | 31028329  | 31089046  | 0.0179 | 0.1042 | 0.4790 | 4  | 4  | 0 |
| CCDC12       | 3  | 3p21.31        | 46963216  | 47023472  | 0.0179 | 0.1042 | 0.4790 | 1  | 9  | 0 |
| MUDEM3       | 14 | 14q22.3        | 57735606  | 57756794  | 0.0179 | 0.1042 | 0.4790 | 2  | 9  | 0 |
| ACO17        | 1  | 1q36.31        | 6324233   | 6453826   | 0.0178 | 0.1042 | 0.4791 |    |    |   |

Supplementary Table 6  
Page 12

|               |    |  |                |           |           |        |        |        |    |    |   |
|---------------|----|--|----------------|-----------|-----------|--------|--------|--------|----|----|---|
| LRRc49        | 15 |  | 15q23          | 71174891  | 71342434  | 0.0169 | 0.1004 | 0.4828 | 3  | 5  | 0 |
| WDR62         | 19 |  | 19q13.12       | 36545783  | 36596012  | 0.0168 | 0.1002 | 0.4829 | 5  | 1  | 0 |
| BSN           | 3  |  | 3p21.31        | 49591922  | 49708981  | 0.0168 | 0.1001 | 0.4830 | 0  | 9  | 0 |
| STAT6         | 12 |  | 12q13.3        | 57489195  | 57505161  | 0.0168 | 0.1000 | 0.4831 | 1  | 8  | 0 |
| CCDC130       | 19 |  | 19p13.2        | 13858720  | 13874106  | 0.0168 | 0.0998 | 0.4832 | 5  | 3  | 0 |
| RPL10A        | 6  |  | 6p21.31        | 35436178  | 35438558  | 0.0167 | 0.0998 | 0.4833 | 10 | 0  | 0 |
| NOL9          | 1  |  | 1p36.31        | 6585222   | 6614595   | 0.0167 | 0.0997 | 0.4834 | 2  | 13 | 0 |
| LRRcH3        | 3  |  | 3q29           | 197518097 | 197610869 | 0.0167 | 0.0996 | 0.4834 | 11 | 2  | 0 |
| ZFC3H1        | 12 |  | 12q21.1        | 72003384  | 72057749  | 0.0167 | 0.0996 | 0.4834 | 2  | 8  | 0 |
| TMEM181       | 6  |  | 6q25.3         | 158957276 | 159056467 | 0.0167 | 0.0996 | 0.4835 | 3  | 6  | 0 |
| KIAA1632      | 18 |  | 18q12.3-q21.1  | 43427575  | 43547305  | 0.0166 | 0.0993 | 0.4836 | 3  | 9  | 0 |
| C11orf82      | 11 |  | 11q14.1        | 82625731  | 82645697  | 0.0166 | 0.0993 | 0.4836 | 7  | 3  | 0 |
| MID2          | 23 |  | 23q22.3        | 107068985 | 107174867 | 0.0166 | 0.0993 | 0.4836 | 2  | 13 | 0 |
| IER5          | 1  |  | 1q25.3         | 181057638 | 181059977 | 0.0166 | 0.0993 | 0.4837 | 17 | 1  | 0 |
| RALGPS1       | 9  |  | 9q33.3         | 129677053 | 129985445 | 0.0166 | 0.0993 | 0.4837 | 3  | 7  | 0 |
| BXDC1         | 6  |  | 6q21           | 111303218 | 111347231 | 0.0166 | 0.0993 | 0.4837 | 7  | 2  | 0 |
| ANKLE1        | 19 |  | 19p13.11       | 17392454  | 17398455  | 0.0166 | 0.0992 | 0.4838 | 3  | 3  | 0 |
| TCP10L        | 21 |  | 21q22.11       | 33948862  | 33984896  | 0.0166 | 0.0992 | 0.4838 | 4  | 6  | 0 |
| TUBG1         | 17 |  | 17q21.2        | 40761694  | 40767247  | 0.0166 | 0.0992 | 0.4839 | 1  | 11 | 0 |
| EXOC1         | 4  |  | 4q12           | 56719816  | 56771244  | 0.0165 | 0.0990 | 0.4840 | 4  | 5  | 0 |
| RPUSD3        | 3  |  | 3p25.3         | 9879533   | 9885743   | 0.0165 | 0.0990 | 0.4840 | 7  | 2  | 0 |
| BAT2L         | 9  |  | 9q34.13        | 134269480 | 134375584 | 0.0165 | 0.0990 | 0.4840 | 3  | 8  | 0 |
| SIGMAR1       | 9  |  | 9p13.3         | 34634719  | 34637768  | 0.0165 | 0.0989 | 0.4841 | 5  | 9  | 0 |
| IPO13         | 1  |  | 1p34.1         | 44412611  | 44433693  | 0.0165 | 0.0989 | 0.4842 | 3  | 3  | 0 |
| ALKBH1        | 14 |  | 14q24.3        | 78138749  | 78174356  | 0.0165 | 0.0989 | 0.4842 | 1  | 11 | 0 |
| OR1G1         | 17 |  | 17p13.3        | 3029904   | 3030959   | 0.0165 | 0.0989 | 0.4843 | 0  | 10 | 0 |
| AFG3L2        | 18 |  | 18p11.21       | 12329108  | 12377194  | 0.0165 | 0.0987 | 0.4844 | 5  | 2  | 0 |
| SLC17A5       | 6  |  | 6q13           | 743303103 | 74363737  | 0.0165 | 0.0987 | 0.4844 | 6  | 1  | 0 |
| CEP110        | 9  |  | 9q33.2         | 123837711 | 123939888 | 0.0164 | 0.0987 | 0.4845 | 3  | 7  | 0 |
| KIFAP3        | 1  |  | 1q24.2         | 168980467 | 170043879 | 0.0164 | 0.0986 | 0.4845 | 17 | 1  | 1 |
| FGFR1         | 8  |  | 8p11.23-p11.22 | 38268657  | 38326352  | 0.0164 | 0.0985 | 0.4846 | 5  | 4  | 1 |
| PDCD6IP       | 3  |  | 3p22.3         | 33839557  | 33911194  | 0.0164 | 0.0985 | 0.4846 | 6  | 5  | 0 |
| KL            | 13 |  | 13q13.1        | 33590571  | 33640279  | 0.0164 | 0.0985 | 0.4846 | 1  | 4  | 0 |
| MAML1         | 5  |  | 5q35.3         | 179159851 | 179218871 | 0.0164 | 0.0985 | 0.4846 | 5  | 4  | 0 |
| BET1          | 7  |  | 7q21.3         | 93592074  | 93633694  | 0.0164 | 0.0985 | 0.4847 | 10 | 0  | 1 |
| ERAL1         | 17 |  | 17q11.2        | 27182034  | 27188078  | 0.0164 | 0.0985 | 0.4847 | 0  | 9  | 0 |
| ADAM22        | 7  |  | 7q21.12        | 87563566  | 87826447  | 0.0163 | 0.0983 | 0.4848 | 8  | 0  | 0 |
| SPTB          | 14 |  | 14q23.3        | 65213001  | 65289866  | 0.0163 | 0.0983 | 0.4848 | 1  | 9  | 0 |
| NUDCD1        | 8  |  | 8q23.1         | 110253149 | 110346350 | 0.0163 | 0.0983 | 0.4849 | 19 | 0  | 2 |
| TSC22D1       | 13 |  | 13q14.11       | 45007661  | 45150701  | 0.0163 | 0.0982 | 0.4850 | 2  | 7  | 0 |
| KIAA0391      | 14 |  | 14q13.2        | 35591769  | 35743268  | 0.0163 | 0.0981 | 0.4850 | 2  | 4  | 0 |
| C13orf27      | 13 |  | 13q33.1        | 103418340 | 103426161 | 0.0163 | 0.0981 | 0.4850 | 11 | 3  | 0 |
| TOMM20        | 1  |  | 1q42.3         | 235272662 | 235292256 | 0.0162 | 0.0979 | 0.4853 | 19 | 1  | 1 |
| LMBR1         | 7  |  | 7q36.3         | 156473571 | 156685910 | 0.0162 | 0.0978 | 0.4853 | 14 | 2  | 0 |
| PDE9A         | 21 |  | 21q22.3        | 44073862  | 44195616  | 0.0162 | 0.0977 | 0.4854 | 2  | 7  | 0 |
| TTC13         | 1  |  | 1q42.2         | 231041990 | 231114607 | 0.0162 | 0.0976 | 0.4855 | 19 | 0  | 1 |
| ZNF346        | 5  |  | 5q35.2         | 176449697 | 176493743 | 0.0162 | 0.0976 | 0.4856 | 4  | 6  | 0 |
| PPA1          | 10 |  | 10q22.1        | 71962586  | 71993190  | 0.0161 | 0.0975 | 0.4856 | 7  | 3  | 1 |
| C5orf44       | 5  |  | 5q12.3         | 64920558  | 64961951  | 0.0161 | 0.0975 | 0.4856 | 0  | 13 | 0 |
| HSPA8         | 11 |  | 11q24.1        | 122928203 | 122932844 | 0.0161 | 0.0974 | 0.4857 | 4  | 6  | 0 |
| C10orf46      | 10 |  | 10q26.11       | 120440494 | 120514758 | 0.0161 | 0.0973 | 0.4858 | 3  | 8  | 0 |
| AP2S1         | 19 |  | 19q13.32       | 47341423  | 47354203  | 0.0161 | 0.0972 | 0.4859 | 3  | 9  | 0 |
| SLAIN2        | 4  |  | 4p11           | 48343613  | 48428215  | 0.0160 | 0.0971 | 0.4860 | 3  | 6  | 0 |
| CTDSP2L       | 15 |  | 15q15.3-q21.1  | 44719579  | 44819430  | 0.0160 | 0.0971 | 0.4860 | 1  | 9  | 0 |
| ANKRD10       | 13 |  | 13q34          | 111530887 | 111567416 | 0.0160 | 0.0971 | 0.4860 | 13 | 2  | 2 |
| UST           | 6  |  | 6q25.1         | 149068271 | 149398125 | 0.0160 | 0.0970 | 0.4861 | 3  | 7  | 0 |
| SNX           | 3  |  | 3q21.2         | 125165495 | 125339058 | 0.0160 | 0.0970 | 0.4861 | 5  | 3  | 0 |
| LHPH          | 10 |  | 10q26.13       | 126150404 | 126332710 | 0.0160 | 0.0969 | 0.4862 | 5  | 8  | 1 |
| CEBPZ         | 2  |  | 2p22.2         | 37428783  | 37458744  | 0.0160 | 0.0968 | 0.4863 | 6  | 1  | 1 |
| MRPL4         | 19 |  | 19p13.2        | 10362640  | 10370736  | 0.0159 | 0.0965 | 0.4865 | 2  | 4  | 0 |
| NSUN5         | 7  |  | 7q11.23        | 72716514  | 72722823  | 0.0159 | 0.0965 | 0.4866 | 2  | 3  | 0 |
| EPC2          | 2  |  | 2q23.1         | 149402009 | 149545136 | 0.0159 | 0.0965 | 0.4866 | 5  | 7  | 0 |
| TTC5          | 14 |  | 14q11.2        | 20757290  | 20774136  | 0.0159 | 0.0965 | 0.4867 | 2  | 4  | 0 |
| CRSP3         | 6  |  | 6q23.2         | 131895108 | 131949363 | 0.0159 | 0.0964 | 0.4867 | 8  | 3  | 1 |
| SOX13         | 1  |  | 1q32.1         | 204042246 | 204096867 | 0.0159 | 0.0963 | 0.4868 | 15 | 1  | 0 |
| ELOF1         | 19 |  | 19p13.2        | 11663858  | 11670051  | 0.0158 | 0.0961 | 0.4869 | 2  | 4  | 0 |
| RP11-426L16.8 | 1  |  | 1p13.2         | 113362792 | 113393265 | 0.0158 | 0.0961 | 0.4870 | 5  | 5  | 0 |
| ZNF682        | 19 |  | 19p12          | 20115227  | 20150277  | 0.0158 | 0.0960 | 0.4870 | 6  | 2  | 0 |
| ERIC1H        | 8  |  | 8p23.3         | 614201    | 681226    | 0.0158 | 0.0960 | 0.4870 | 3  | 12 | 0 |
| C19orf60      | 19 |  | 19p13.11       | 18699495  | 18703146  | 0.0158 | 0.0960 | 0.4871 | 4  | 3  | 0 |
| DDX49         | 19 |  | 19p13.11       | 19030494  | 19039438  | 0.0158 | 0.0960 | 0.4871 | 4  | 3  | 0 |
| SCAPER        | 15 |  | 15q24.3        | 76640538  | 77197744  | 0.0157 | 0.0959 | 0.4872 | 4  | 5  | 0 |
| C5orf5        | 5  |  | 5q31.2         | 137273638 | 137368802 | 0.0157 | 0.0959 | 0.4873 | 1  | 12 | 0 |
| PKP2          | 12 |  | 12p11.21       | 32943680  | 33049780  | 0.0157 | 0.0959 | 0.4873 | 4  | 4  | 0 |
| COQ3          | 6  |  | 6q16.2         | 99817276  | 99842080  | 0.0157 | 0.0958 | 0.4873 | 7  | 5  | 0 |
| NDUFA5        | 7  |  | 7q31.32        | 123181083 | 123197958 | 0.0157 | 0.0958 | 0.4873 | 12 | 0  | 0 |
| TMEM35        | 23 |  | 23q22.1        | 100333836 | 100351353 | 0.0157 | 0.0958 | 0.4874 | 1  | 13 | 0 |
| ITGB3BP       | 1  |  | 1p31.3         | 63906444  | 63988865  | 0.0157 | 0.0958 | 0.4874 | 7  | 2  | 0 |
| TOB2          | 22 |  | 22q13.2        | 41829492  | 41843027  | 0.0157 | 0.0958 | 0.4874 | 2  | 6  | 0 |
| DIDO1         | 20 |  | 20q13.33       | 61509090  | 61569274  | 0.0157 | 0.0958 | 0.4874 | 9  | 7  | 0 |
| RASSF6        | 4  |  | 4q13.3         | 74438160  | 74486287  | 0.0157 | 0.0957 | 0.4875 | 5  | 3  | 0 |
| ZDHHC14       | 6  |  | 6q25.3         | 157802557 | 158094977 | 0.0157 | 0.0957 | 0.4875 | 5  | 7  | 0 |
| OFD1          | 23 |  | 23p22.2        | 13752832  | 13787480  | 0.0157 | 0.0957 | 0.4875 | 5  | 10 | 0 |
| FUC1A2        | 6  |  | 6q24.2         | 143815949 | 143832837 | 0.0157 | 0.0957 | 0.4875 | 7  | 5  | 0 |
| WWC1          | 5  |  | 5q34           | 167719092 | 167896756 | 0.0156 | 0.0955 | 0.4877 | 2  | 14 | 0 |
| SMH5          | 6  |  | 6p14.3         | 86386725  | 86388451  | 0.0156 | 0.0954 | 0.4878 | 8  | 3  | 0 |
| C4orf16       | 4  |  | 4q25           | 113152895 | 113191209 | 0.0156 | 0.0953 | 0.4879 | 2  | 4  | 0 |
| BEX1          | 23 |  | 23q22.1        | 102317588 | 102319168 | 0.0156 | 0.0952 | 0.4879 | 1  | 13 | 0 |
| PTGES3        | 12 |  | 12q13.3        | 57057127  | 57082078  | 0.0156 | 0.0952 | 0.4880 | 1  | 7  | 0 |
| GTF2B         | 1  |  | 1p22.2         | 89318322  | 89357301  | 0.0155 | 0.0951 | 0.4881 | 6  | 7  | 0 |
| UBA2          | 19 |  | 19q13.11       | 34919268  | 34960795  | 0.0155 | 0.0947 | 0.4883 | 5  | 2  | 0 |
| CDR2          | 16 |  | 16p12.2        | 22357257  | 22385938  | 0.0155 | 0.0947 | 0.4884 | 0  | 4  | 0 |
| ATAD2         | 8  |  | 8q24.13        | 124332093 | 124408705 | 0.0154 | 0.0945 | 0.4885 | 17 | 0  | 1 |
| RG9MTD3       | 9  |  | 9p13.2         | 37753802  | 37778969  | 0.0154 | 0.0945 | 0.4886 | 7  | 9  | 0 |
| CCDC41        | 3  |  | 3p21.31        | 4919958   | 49203785  | 0.0154 | 0.0945 | 0.4886 | 0  | 8  | 0 |
| PQBP1         | 23 |  | 23p11.23       | 48755195  | 48760419  | 0.0154 | 0.0944 | 0.4887 | 2  | 13 | 0 |
| KIF1B         | 1  |  | 1p36.22        | 10270764  | 10441661  | 0.0154 | 0.0942 | 0.4888 | 0  | 11 | 0 |
| DHX9          | 1  |  | 1q25.3         | 182808451 | 182856882 | 0.0153 | 0.0940 | 0.4890 | 16 | 1  | 1 |
| THAP8         | 19 |  | 19q13.12       | 36525887  | 36545664  | 0.0153 | 0.0939 | 0.4891 | 5  | 1  | 0 |
| USP32         | 17 |  | 17q23.1-q23.2  | 58254691  | 58469586  | 0.0153 | 0.0939 | 0.4891 | 5  | 4  | 0 |
| PKI           | 2  |  | 2q31.1         | 173420101 | 173463862 | 0.0153 | 0.0938 | 0.4892 | 8  | 3  | 0 |
| USE1          | 19 |  | 19p13.11       | 17326155  | 17330638  | 0.0153 | 0.0938 | 0.4892 | 3  | 2  | 0 |
| DHX29         | 5  |  | 5q11.2         | 54552074  | 54603521  | 0.0153 | 0.0938 | 0.4893 | 0  | 13 | 0 |
| ENDOG         | 9  |  | 9q34.11        | 131580779 | 131584955 | 0.0152 | 0.0938 | 0.4893 | 3  | 7  | 0 |
| CCDC55        | 17 |  | 17q11.2        | 28443834  | 28513491  | 0.0152 | 0.0937 | 0.4893 | 0  | 7  | 0 |
| DYNCL1H       | 7  |  | 7q21.3         | 95401818  | 95727736  | 0.0152 | 0.0937 | 0.4894 | 7  | 0  | 0 |
| LRRc58        | 3  |  | 3q13.33        | 120043576 | 120068186 | 0.0152 | 0.0937 | 0.4894 | 5  | 4  | 0 |
| SNX8          | 7  |  | 7p22.3         | 2294641   | 2393953   | 0.0152 | 0.0937 | 0.4894 | 4  | 7  | 0 |
| DNAJC28       | 21 |  | 21q22.11       | 34860238  | 34864023  | 0.0152 | 0.0936 | 0.4895 | 5  | 6  | 0 |
| ZNF20         | 19 |  | 19p13.2        | 12242803  | 12251     |        |        |        |    |    |   |

Supplementary Table 6  
Page 13

|            |    |               |           |           |        |        |          |    |    |   |
|------------|----|---------------|-----------|-----------|--------|--------|----------|----|----|---|
| HIF1AN     | 10 | 10q24.31      | 102295616 | 102313680 | 0.0144 | 0.0905 | 0.4930   | 0  | 10 | 0 |
| STAT5A     | 17 | 17q21.2       | 40439565  | 40463958  | 0.0144 | 0.0904 | 0.4931   | 1  | 11 | 0 |
| SPHKAP     | 2  | 2p36.3        | 228844670 | 229046361 | 0.0144 | 0.0904 | 0.4931   | 2  | 9  | 0 |
| IPO11      | 5  | 5q12.1        | 61698877  | 61924415  | 0.0143 | 0.0904 | 0.4931   | 0  | 12 | 0 |
| KLRAO1     | 2  | 2p16.3        | 48667737  | 48742525  | 0.0143 | 0.0902 | 0.4932   | 7  | 2  | 0 |
| CYP2C8     | 10 | 10q23.33      | 96796529  | 96829254  | 0.0143 | 0.0901 | 0.4934   | 1  | 11 | 0 |
| C12orf23   | 12 | 12q23.3       | 107349544 | 107367811 | 0.0143 | 0.0901 | 0.4934   | 3  | 9  | 0 |
| TRIP12     | 2  | 2q36.3        | 230631930 | 230787955 | 0.0143 | 0.0900 | 0.4935   | 3  | 7  | 0 |
| CXorf39    | 23 | 23q22.2       | 103411301 | 103436125 | 0.0143 | 0.0900 | 0.4935   | 2  | 13 | 0 |
| GTSF1      | 12 | 12q13.13      | 54849738  | 54867386  | 0.0142 | 0.0899 | 0.4936   | 0  | 11 | 0 |
| SORBS3     | 8  | 8p21.3        | 22409251  | 22433007  | 0.0142 | 0.0899 | 0.4936   | 0  | 13 | 0 |
| STRN3      | 14 | 14q12         | 31363005  | 31495607  | 0.0142 | 0.0899 | 0.4936   | 4  | 4  | 0 |
| EIF2B1     | 12 | 12q24.31      | 124105570 | 124118247 | 0.0142 | 0.0899 | 0.4936   | 2  | 8  | 0 |
| HSPH1      | 13 | 13q12.3       | 31710762  | 31736502  | 0.0142 | 0.0899 | 0.4937   | 3  | 4  | 0 |
| SCAND2     | 15 | 15q25.2       | 85174691  | 85185694  | 0.0142 | 0.0898 | 0.4937   | 5  | 6  | 0 |
| DLD        | 7  | 7q31.1        | 107531586 | 107572175 | 0.0142 | 0.0898 | 0.4938   | 9  | 2  | 0 |
| XAGE3      | 23 | 23p11.22      | 52891560  | 52897119  | 0.0142 | 0.0897 | 0.4938   | 2  | 13 | 0 |
| DNAJA2     | 16 | 16q11.2-q12.1 | 46989274  | 47007625  | 0.0142 | 0.0896 | 0.4940   | 3  | 5  | 0 |
| PGM3       | 6  | 6q14.1-q14.2  | 83878630  | 83902971  | 0.0141 | 0.0896 | 0.4940   | 7  | 2  | 0 |
| ZFP64      | 20 | 20q13.2       | 50668202  | 50808524  | 0.0141 | 0.0895 | 0.4941   | 4  | 4  | 0 |
| C1orf2     | 1  | 1q22          | 155216997 | 155225274 | 0.0141 | 0.0891 | 0.4944   | 15 | 0  | 0 |
| C2CD3      | 11 | 11q13.4       | 73724430  | 73882064  | 0.0141 | 0.0890 | 0.4944   | 3  | 2  | 0 |
| SLC31A2    | 9  | 9q32          | 115913238 | 115926421 | 0.0141 | 0.0890 | 0.4944   | 2  | 8  | 0 |
| ENTPD5     | 14 | 14q24.3       | 74433193  | 74482634  | 0.0140 | 0.0889 | 0.4945   | 1  | 10 | 0 |
| CLIP1      | 12 | 12q24.31      | 122755981 | 122907116 | 0.0140 | 0.0889 | 0.4946   | 2  | 6  | 0 |
| PTER       | 10 | 10p13         | 16478964  | 16555736  | 0.0140 | 0.0889 | 0.4946   | 11 | 1  | 1 |
| PAF1       | 19 | 19q13.2       | 39876275  | 39881746  | 0.0140 | 0.0888 | 0.4947   | 4  | 6  | 0 |
| SFRP1      | 8  | 8p11.21       | 41119483  | 41166992  | 0.0140 | 0.0887 | 0.4947   | 8  | 2  | 0 |
| USP13      | 3  | 3q26.33       | 179370933 | 179507189 | 0.0140 | 0.0887 | 0.4948   | 16 | 0  | 0 |
| PUS7L      | 12 | 12q12         | 44122416  | 44152596  | 0.0140 | 0.0887 | 0.4948   | 3  | 7  | 0 |
| RAB25      | 1  | 1q22          | 156030966 | 156040293 | 0.0139 | 0.0886 | 0.4949   | 15 | 0  | 0 |
| AGPAT5     | 8  | 8p23.1        | 6565878   | 6619019   | 0.0139 | 0.0882 | 0.4952   | 1  | 12 | 0 |
| DHCR7      | 11 | 11q13.4       | 71145457  | 71159477  | 0.0139 | 0.0881 | 0.4953   | 9  | 2  | 1 |
| FCER1A     | 1  | 1q23.2        | 159259504 | 159278014 | 0.0139 | 0.0881 | 0.4953   | 19 | 0  | 2 |
| PDHB       | 3  | 3p14.3        | 58413354  | 58419565  | 0.0138 | 0.0880 | 0.4954   | 0  | 11 | 0 |
| ARHGAP28   | 18 | 18p11.31      | 6729821   | 6915699   | 0.0138 | 0.0880 | 0.4954   | 7  | 5  | 0 |
| PSRC1      | 1  | 1p13.3        | 109822176 | 109825808 | 0.0138 | 0.0880 | 0.4954   | 4  | 5  | 0 |
| BPHL       | 6  | 6p25.2        | 3118608   | 3153432   | 0.0138 | 0.0879 | 0.4955   | 12 | 3  | 0 |
| AC133961.3 | 4  | 4p15.2        | 25915528  | 25931500  | 0.0138 | 0.0878 | 0.4957   | 0  | 18 | 0 |
| SRPRB      | 3  | 3q22.1        | 133524665 | 133539523 | 0.0138 | 0.0877 | 0.4957   | 13 | 0  | 0 |
| RAC1       | 7  | 7p22.1        | 6414126   | 6443598   | 0.0138 | 0.0877 | 0.4957   | 3  | 1  | 0 |
| TRNT1      | 3  | 3p26.2        | 3168600   | 3192563   | 0.0138 | 0.0877 | 0.4957   | 6  | 7  | 1 |
| TRIM8      | 10 | 10q24.32      | 104404252 | 104418164 | 0.0137 | 0.0877 | 0.4958   | 0  | 7  | 0 |
| SLC35D2    | 9  | 9q22.32       | 99082989  | 99145992  | 0.0137 | 0.0877 | 0.4958   | 2  | 7  | 0 |
| SNRNP200   | 2  | 2q11.2        | 96940077  | 96971261  | 0.0137 | 0.0877 | 0.4958   | 7  | 4  | 1 |
| PCSK6      | 15 | 15q26.3       | 101844134 | 102030187 | 0.0137 | 0.0877 | 0.4959   | 11 | 2  | 0 |
| C6orf64    | 6  | 6p21.2        | 39071840  | 39082949  | 0.0137 | 0.0877 | 0.4959   | 12 | 1  | 0 |
| ZNF248     | 10 | 10p11.1       | 38117899  | 38147034  | 0.0137 | 0.0877 | 0.4959   | 8  | 1  | 0 |
| SRD5A1     | 5  | 5p15.31       | 6633500   | 6669673   | 0.0137 | 0.0875 | 0.4960   | 8  | 5  | 1 |
| ACAA1      | 3  | 3p22.2        | 38144620  | 38178733  | 0.0137 | 0.0874 | 0.4961   | 4  | 5  | 0 |
| DNM1L      | 12 | 12p11.21      | 32832137  | 32898584  | 0.0136 | 0.0872 | 0.4963   | 4  | 5  | 0 |
| GTPBP10    | 7  | 7q21.13       | 89969685  | 90016650  | 0.0136 | 0.0870 | 0.4965   | 8  | 0  | 0 |
| GNL3       | 3  | 3p21.1        | 52719936  | 52728508  | 0.0136 | 0.0869 | 0.4965   | 2  | 9  | 0 |
| CCDC28A    | 6  | 6q24.1        | 139094646 | 139114454 | 0.0136 | 0.0869 | 0.4965   | 7  | 3  | 1 |
| OIP5       | 15 | 15q15.1       | 41601470  | 41624819  | 0.0136 | 0.0869 | 0.4966   | 0  | 10 | 0 |
| AP006216.9 | 11 | 11q23.3       | 116714118 | 116969137 | 0.0136 | 0.0869 | 0.4966   | 5  | 5  | 0 |
| NNT        | 5  | 5p12          | 43602791  | 43705687  | 0.0136 | 0.0869 | 0.4966   | 6  | 4  | 0 |
| C17orf32   | 17 | 17q11.2       | 26864687  | 26728046  | 0.0136 | 0.0869 | 0.4966   | 1  | 9  | 0 |
| POLR2J3    | 7  | 7q22.1        | 102178366 | 102213075 | 0.0136 | 0.0869 | 0.4967   | 1  | 6  | 0 |
| CCDC42     | 17 | 17p13.1       | 8633252   | 8648154   | 0.0136 | 0.0869 | 0.4967   | 0  | 15 | 0 |
| CBLC       | 19 | 19q13.32      | 45281126  | 45303903  | 0.0135 | 0.0866 | 0.4969   | 3  | 7  | 0 |
| NF2        | 22 | 22q12.2       | 29999545  | 30094583  | 0.0135 | 0.0866 | 0.4969   | 2  | 7  | 0 |
| MTHFD2L    | 4  | 4q13.3        | 74979891  | 75168816  | 0.0135 | 0.0866 | 0.4969   | 4  | 3  | 0 |
| C5orf35    | 5  | 5q11.2        | 56205100  | 56213175  | 0.0135 | 0.0866 | 0.4969   | 0  | 15 | 0 |
| RPL23      | 17 | 17q12         | 37004118  | 37010053  | 0.0135 | 0.0866 | 0.4970   | 3  | 9  | 0 |
| RPP40      | 6  | 6p25.1        | 4995283   | 5004271   | 0.0135 | 0.0866 | 0.4971   | 8  | 3  | 0 |
| SLC35F5    | 2  | 2q14.1        | 114471930 | 114514400 | 0.0135 | 0.0865 | 0.4971   | 4  | 6  | 0 |
| GPR19      | 12 | 12p13.1       | 12813995  | 12849121  | 0.0135 | 0.0865 | 0.4971   | 7  | 5  | 0 |
| CCDC91     | 12 | 12p11.22      | 28410133  | 28703098  | 0.0134 | 0.0864 | 0.4972   | 7  | 5  | 0 |
| MFSD6      | 2  | 2q32.2        | 191273081 | 191373931 | 0.0134 | 0.0864 | 0.4973   | 5  | 2  | 0 |
| MAP3K19    | 1  | 1q42.2        | 233463514 | 233520894 | 0.0134 | 0.0864 | 0.4973   | 21 | 0  | 1 |
| ACOX1      | 17 | 17q25.1       | 73937596  | 73975444  | 0.0134 | 0.0863 | 0.4974   | 7  | 3  | 0 |
| RAD18      | 3  | 3p25.3        | 8817088   | 9005457   | 0.0134 | 0.0863 | 0.4974   | 7  | 4  | 0 |
| ADAM10     | 15 | 15q21.3       | 58888510  | 59042177  | 0.0134 | 0.0863 | 0.4974   | 1  | 6  | 0 |
| SMARCA4    | 19 | 19p13.2       | 11071598  | 11172958  | 0.0134 | 0.0863 | 0.4974   | 2  | 4  | 0 |
| ASPH       | 8  | 8q12.3        | 62413115  | 62627199  | 0.0134 | 0.0863 | 0.4975   | 14 | 1  | 0 |
| WDR7       | 18 | 18q21.31      | 54318616  | 54697042  | 0.0134 | 0.0862 | 0.4976   | 4  | 10 | 0 |
| UOCRH      | 1  | 1p34.1        | 46769370  | 46782445  | 0.0134 | 0.0862 | 0.4976   | 3  | 4  | 0 |
| ZNF135     | 19 | 19q13.43      | 58570607  | 58580771  | 0.0134 | 0.0862 | 0.4976   | 2  | 6  | 0 |
| CACYBP     | 1  | 1q25.1        | 174968571 | 174981163 | 0.0133 | 0.0862 | 0.4977   | 16 | 1  | 0 |
| LRP11      | 6  | 6q25.1        | 150139934 | 150185480 | 0.0133 | 0.0861 | 0.4978   | 3  | 8  | 0 |
| MAGOH      | 1  | 1p32.3        | 53692566  | 53704207  | 0.0133 | 0.0861 | 0.4978   | 8  | 6  | 1 |
| SFN        | 1  | 1p36.11       | 27189653  | 27190947  | 0.0133 | 0.0861 | 0.4978   | 0  | 10 | 0 |
| MRM1       | 17 | 17q12         | 34958001  | 34965397  | 0.0133 | 0.0860 | 0.4979   | 5  | 11 | 1 |
| EP38       | 12 | 12p12.3       | 15773076  | 15942510  | 0.0133 | 0.0860 | 0.4979   | 7  | 4  | 0 |
| GTF3C1     | 16 | 16p12.1       | 27471935  | 27581251  | 0.0133 | 0.0860 | 0.4980   | 3  | 3  | 0 |
| SNAPC5     | 15 | 15q22.31      | 66762666  | 66790146  | 0.0132 | 0.0857 | 0.4981   | 4  | 6  | 0 |
| TIMM50     | 19 | 19q13.2       | 39971052  | 39981528  | 0.0132 | 0.0856 | 0.4982   | 4  | 6  | 0 |
| IGSF9      | 1  | 1q23.2        | 159896829 | 159915394 | 0.0132 | 0.0856 | 0.4983   | 20 | 1  | 3 |
| C14orf28   | 14 | 14q21.2       | 45366507  | 45376460  | 0.0132 | 0.0855 | 0.4984   | 3  | 5  | 0 |
| MRPL48     | 11 | 11q13.4       | 73498917  | 73575655  | 0.0132 | 0.0855 | 0.4984   | 3  | 2  | 0 |
| LASP1      | 17 | 17q12         | 37026112  | 37078023  | 0.0132 | 0.0855 | 0.4984   | 3  | 9  | 0 |
| PXMP3      | 8  | 8q21.11       | 77892496  | 77912524  | 0.0132 | 0.0854 | 0.4985   | 14 | 1  | 1 |
| EXOSC5     | 19 | 19q13.2       | 41892281  | 41903256  | 0.0132 | 0.0854 | 0.4985   | 5  | 7  | 0 |
| PNRC1      | 6  | 6q15          | 89790429  | 89794879  | 0.0131 | 0.0853 | 0.4986   | 6  | 2  | 0 |
| RNGTT      | 6  | 6q15          | 89319989  | 89673348  | 0.0131 | 0.0853 | 0.4986   | 6  | 2  | 0 |
| GDPD1      | 17 | 17q22         | 57297834  | 57352559  | 0.0131 | 0.0853 | 0.4986   | 5  | 4  | 0 |
| FALZ       | 17 | 17q24.2       | 65821780  | 65980494  | 0.0131 | 0.0853 | 0.4986   | 6  | 2  | 0 |
| TRPV3      | 17 | 17p13.2       | 3416486   | 3461289   | 0.0131 | 0.0853 | 0.4987   | 0  | 11 | 0 |
| ZC3H14     | 14 | 14q31.3       | 89029314  | 89079852  | 0.0131 | 0.0853 | 0.4987   | 2  | 11 | 0 |
| FTS        | 16 | 16q12.2       | 53525192  | 53537170  | 0.0131 | 0.0853 | 0.4987   | 3  | 10 | 0 |
| ABCD3      | 1  | 1p21.3        | 94883933  | 94984219  | 0.0131 | 0.0853 | 0.4987   | 6  | 8  | 0 |
| PRDX1      | 1  | 1p34.1        | 45976708  | 45988719  | 0.0131 | 0.0852 | 0.4988   | 3  | 3  | 0 |
| MNAT1      | 14 | 14q23.1       | 61201470  | 61435396  | 0.0131 | 0.0852 | 0.4988   | 1  | 9  | 0 |
| B3GNT5     | 3  | 3q27.1        | 182971032 | 182991178 | 0.0131 | 0.0852 | 0.4989   | 12 | 1  | 1 |
| MAP1LC3B   | 16 | 16q24.2       | 87425801  | 87438369  | 0.0131 | 0.0851 | 0.4990   | 3  | 9  | 0 |
| PITRM1     | 10 | 10p15.2       | 3179922   | 3215003   | 0.0130 | 0.0851 | 0.4990   | 16 | 0  | 2 |
| TPD52      | 8  | 8q21.13       | 80947107  | 81083836  | 0.0130 | 0.0850 | 0.4991   | 12 | 1  | 1 |
| KCNK12     | 2  | 2p21          | 47747936  | 47797498  | 0.0130 | 0.0850 | 0.4991   | 6  | 3  | 0 |
| PRPF31     | 19 | 19q13.42      | 54618790  | 54635150  | 0.0130 | 0.0849 | 0.4992   | 3  | 5  | 0 |
| PIAS1      | 15 | 15q23         | 68346572  | 68480402  | 0.0130 | 0.0849 | 0.4992   | 5  | 4  | 0 |
| GULP1      | 2  | 2q32.1-q32.2  | 189156396 | 189460653 | 0.0130 | 0.0849 | 0.4992   | 4  | 2  | 0 |
| AIFM2      | 10 | 10q22.1       | 171857979 | 171892690 | 0.0130 | 0.0848 | 0.4994   | 7  | 3  | 1 |
| RPS25      | 11 | 11q23.3       | 11888425  | 118890567 | 0.0130 | 0.0848 | 0.4994</ |    |    |   |

Supplementary Table 6  
Page 14

|              |    |                 |           |           |        |        |        |    |    |   |
|--------------|----|-----------------|-----------|-----------|--------|--------|--------|----|----|---|
| OPRK1        | 8  | 8q11.23         | 54138276  | 54164194  | 0.0121 | 0.0812 | 0.5036 | 11 | 2  | 0 |
| VTCN1        | 1  | 1p13.1          | 117686209 | 117753549 | 0.0121 | 0.0812 | 0.5036 | 4  | 5  | 0 |
| MTIF2        | 2  | 2p16.1          | 55463731  | 55496483  | 0.0121 | 0.0812 | 0.5036 | 8  | 1  | 0 |
| ACBD7        | 10 | 10p13           | 15117475  | 15130775  | 0.0121 | 0.0812 | 0.5036 | 9  | 2  | 1 |
| G3BP1        | 5  | 5q33.1          | 151151476 | 151184913 | 0.0121 | 0.0812 | 0.5037 | 0  | 14 | 0 |
| DDX42        | 17 | 17q23.3         | 61851560  | 61896676  | 0.0121 | 0.0812 | 0.5037 | 6  | 2  | 0 |
| TFF3         | 21 | 21q22.3         | 43726682  | 43735706  | 0.0121 | 0.0812 | 0.5037 | 5  | 6  | 1 |
| RG9MTD2      | 4  | 4q23            | 100467874 | 100485189 | 0.0121 | 0.0811 | 0.5038 | 3  | 4  | 0 |
| TMEM131      | 2  | 2q11.2          | 98372796  | 98612354  | 0.0121 | 0.0810 | 0.5038 | 7  | 4  | 1 |
| NXF1         | 11 | 11q12.3         | 62559598  | 62572964  | 0.0121 | 0.0810 | 0.5039 | 1  | 2  | 0 |
| CARD15       | 16 | 16q12.1         | 50731050  | 50766987  | 0.0120 | 0.0809 | 0.5040 | 4  | 12 | 0 |
| RPAP3        | 12 | 12q13.11        | 48057075  | 48099774  | 0.0120 | 0.0808 | 0.5040 | 3  | 7  | 0 |
| PSMF1        | 20 | 20p13           | 1093906   | 1160596   | 0.0120 | 0.0808 | 0.5040 | 6  | 7  | 1 |
| YY1AP1       | 1  | 1q22            | 155584517 | 155658791 | 0.0120 | 0.0808 | 0.5041 | 15 | 0  | 0 |
| SAR1B        | 5  | 5q31.1          | 133942120 | 133968527 | 0.0120 | 0.0807 | 0.5042 | 0  | 12 | 0 |
| ZSWIM5       | 1  | 1p34.1          | 45482078  | 45672250  | 0.0120 | 0.0807 | 0.5042 | 3  | 3  | 0 |
| ANKRD36B     | 2  | 2q11.2          | 98121261  | 98206329  | 0.0120 | 0.0807 | 0.5042 | 7  | 4  | 1 |
| MRPS12       | 19 | 19q13.2         | 39421348  | 39423657  | 0.0120 | 0.0807 | 0.5043 | 4  | 6  | 0 |
| VDAC1        | 5  | 5q31.1          | 133307606 | 133340824 | 0.0120 | 0.0807 | 0.5043 | 1  | 14 | 0 |
| SEC24C       | 10 | 10q22.2         | 75504132  | 75531917  | 0.0120 | 0.0807 | 0.5043 | 3  | 3  | 0 |
| TRIM2        | 4  | 4q31.3          | 154073645 | 154260474 | 0.0120 | 0.0806 | 0.5044 | 1  | 8  | 0 |
| ATP6V1E1     | 22 | 22q11.21        | 18074902  | 18111588  | 0.0119 | 0.0805 | 0.5045 | 1  | 7  | 0 |
| SETD5        | 3  | 3p25.3          | 9439299   | 9520924   | 0.0119 | 0.0803 | 0.5046 | 7  | 2  | 0 |
| LRRRC8C      | 1  | 1p22.2          | 90098644  | 90185094  | 0.0119 | 0.0802 | 0.5047 | 6  | 7  | 0 |
| KLK10        | 19 | 19q13.41        | 51516001  | 51523431  | 0.0119 | 0.0802 | 0.5048 | 3  | 5  | 0 |
| RCC1         | 1  | 1p35.3          | 28832492  | 28865607  | 0.0119 | 0.0801 | 0.5049 | 0  | 9  | 0 |
| C14orf100    | 14 | 14q23.1         | 59951161  | 59972081  | 0.0119 | 0.0801 | 0.5049 | 2  | 9  | 0 |
| PRC2         | 13 | 13q34           | 113812968 | 113826694 | 0.0118 | 0.0800 | 0.5050 | 11 | 2  | 2 |
| C1orf127     | 1  | 1q31.1          | 186345001 | 186390499 | 0.0118 | 0.0799 | 0.5051 | 17 | 0  | 1 |
| UBR7         | 14 | 14q32.12        | 93673401  | 93695553  | 0.0118 | 0.0799 | 0.5051 | 3  | 10 | 0 |
| RPS6KC1      | 1  | 1q32.3          | 213224588 | 213446807 | 0.0118 | 0.0799 | 0.5051 | 17 | 2  | 0 |
| RNF2         | 1  | 1q25.3          | 185014551 | 185071740 | 0.0118 | 0.0798 | 0.5052 | 17 | 0  | 1 |
| FAM131A      | 3  | 3q27.1          | 184053714 | 184064065 | 0.0118 | 0.0798 | 0.5053 | 12 | 1  | 0 |
| GOSR2        | 17 | 17q21.32        | 45000486  | 45022263  | 0.0118 | 0.0797 | 0.5053 | 2  | 7  | 0 |
| ADCK1        | 14 | 14q24.3         | 78266426  | 78400296  | 0.0118 | 0.0797 | 0.5053 | 1  | 11 | 0 |
| C16orf44     | 16 | 16q24.1         | 84682131  | 84695915  | 0.0118 | 0.0797 | 0.5054 | 3  | 9  | 0 |
| ASPHD2       | 22 | 22q12.1         | 26825280  | 26840978  | 0.0118 | 0.0797 | 0.5054 | 3  | 11 | 0 |
| PCCB         | 3  | 3q22.3          | 135969167 | 136049011 | 0.0117 | 0.0796 | 0.5055 | 7  | 0  | 0 |
| ARNTL2       | 12 | 12p11.23        | 27485988  | 27573466  | 0.0117 | 0.0796 | 0.5055 | 7  | 5  | 0 |
| MTO1         | 6  | 6q13            | 74171454  | 74211177  | 0.0117 | 0.0796 | 0.5056 | 6  | 1  | 0 |
| GGPS1        | 1  | 1q42.3          | 235491753 | 235507840 | 0.0117 | 0.0795 | 0.5057 | 19 | 1  | 1 |
| RP5-834A16.1 | 23 | 23p11.22        | 54698419  | 54699071  | 0.0117 | 0.0795 | 0.5057 | 1  | 11 | 0 |
| AC021054.28  | 12 | 12p13.33        | 752148    | 755044    | 0.0117 | 0.0795 | 0.5057 | 15 | 2  | 2 |
| ARTN         | 1  | 1p34.1          | 44398992  | 44402911  | 0.0117 | 0.0794 | 0.5058 | 3  | 3  | 0 |
| TRPC6        | 11 | 11q22.1         | 101322295 | 101454659 | 0.0117 | 0.0794 | 0.5058 | 5  | 3  | 0 |
| PPPDE1       | 1  | 1q44            | 244816352 | 244872335 | 0.0116 | 0.0792 | 0.5060 | 18 | 0  | 1 |
| RAB35        | 12 | 12q24.23        | 120532899 | 120554599 | 0.0116 | 0.0791 | 0.5061 | 2  | 6  | 0 |
| PTAR1        | 9  | 9q21.12         | 72324439  | 72374876  | 0.0116 | 0.0791 | 0.5062 | 4  | 5  | 0 |
| EXOC3        | 5  | 5p15.33         | 446264    | 467407    | 0.0116 | 0.0790 | 0.5062 | 9  | 4  | 0 |
| PARD3        | 10 | 10p11.22-p11.21 | 34398489  | 35104249  | 0.0116 | 0.0790 | 0.5063 | 12 | 1  | 0 |
| STK17B       | 2  | 2q32.3          | 196998308 | 197041227 | 0.0116 | 0.0790 | 0.5063 | 5  | 4  | 0 |
| C1orf135     | 1  | 1p36.11         | 26160497  | 26185848  | 0.0116 | 0.0790 | 0.5063 | 1  | 12 | 0 |
| E1F4G3       | 1  | 1p36.12         | 21132972  | 21503377  | 0.0116 | 0.0790 | 0.5064 | 0  | 11 | 0 |
| PPP1R12B     | 1  | 1q32.1          | 202317836 | 202557697 | 0.0116 | 0.0790 | 0.5064 | 14 | 1  | 0 |
| C19orf12     | 19 | 19q12           | 30189794  | 30206452  | 0.0116 | 0.0790 | 0.5064 | 10 | 1  | 1 |
| MED26        | 19 | 19p13.1         | 16685718  | 16739015  | 0.0115 | 0.0788 | 0.5066 | 3  | 2  | 0 |
| ZNFX187      | 6  | 6p22.1          | 28234788  | 28245974  | 0.0115 | 0.0787 | 0.5067 | 8  | 0  | 0 |
| HDDC2        | 6  | 6q22.31         | 125596406 | 125623282 | 0.0115 | 0.0785 | 0.5069 | 12 | 2  | 2 |
| UBE2K        | 4  | 4p14            | 39699664  | 39794408  | 0.0115 | 0.0785 | 0.5069 | 1  | 13 | 0 |
| BUB1         | 2  | 2q13            | 111395409 | 111435684 | 0.0115 | 0.0784 | 0.5070 | 4  | 6  | 0 |
| ORC2L        | 2  | 2q33.1          | 201774895 | 201828410 | 0.0115 | 0.0784 | 0.5070 | 2  | 6  | 0 |
| PDGFD        | 11 | 11q22.3         | 103777915 | 104035027 | 0.0115 | 0.0784 | 0.5070 | 4  | 3  | 0 |
| PIGO         | 9  | 9q13.3          | 35088685  | 35096579  | 0.0115 | 0.0784 | 0.5070 | 5  | 9  | 0 |
| MRPL53       | 2  | 2p13.1          | 74699109  | 74699927  | 0.0115 | 0.0784 | 0.5070 | 3  | 2  | 0 |
| SPRR2F       | 1  | 1q21.3          | 153084612 | 153085989 | 0.0114 | 0.0781 | 0.5073 | 17 | 1  | 1 |
| HMGCS1       | 5  | 5p12            | 43289493  | 43313595  | 0.0114 | 0.0780 | 0.5074 | 4  | 4  | 0 |
| TM2D1        | 1  | 1p31.3          | 62146717  | 62191095  | 0.0114 | 0.0780 | 0.5074 | 7  | 3  | 0 |
| UBAP2        | 9  | 9p13.3          | 33921691  | 34048947  | 0.0114 | 0.0779 | 0.5075 | 3  | 9  | 0 |
| C8orf76      | 8  | 8q24.13         | 124232231 | 124253617 | 0.0113 | 0.0777 | 0.5077 | 17 | 0  | 1 |
| PSIP1        | 9  | 9p22.3          | 15464067  | 15511003  | 0.0113 | 0.0777 | 0.5077 | 6  | 9  | 0 |
| ITGAE        | 17 | 17p13.2         | 3617923   | 3704544   | 0.0113 | 0.0777 | 0.5077 | 0  | 10 | 0 |
| MCM4         | 8  | 8q11.21         | 48873494  | 48890068  | 0.0113 | 0.0776 | 0.5078 | 8  | 2  | 0 |
| XRCC2        | 7  | 7q36.1          | 152343589 | 152373250 | 0.0113 | 0.0774 | 0.5079 | 10 | 3  | 0 |
| RPL24        | 3  | 3q12.3          | 101399936 | 101405563 | 0.0113 | 0.0774 | 0.5080 | 4  | 2  | 0 |
| SDCBP2       | 20 | 20p13           | 1290619   | 1309838   | 0.0113 | 0.0774 | 0.5080 | 6  | 7  | 1 |
| OBSCN        | 1  | 1q42.13         | 228395861 | 228566575 | 0.0113 | 0.0774 | 0.5081 | 18 | 0  | 0 |
| SNX6         | 14 | 14q13.1         | 35030618  | 35099366  | 0.0112 | 0.0772 | 0.5082 | 3  | 4  | 0 |
| DMRTA1       | 9  | 9p21.3          | 22446840  | 22452472  | 0.0112 | 0.0772 | 0.5082 | 5  | 11 | 0 |
| FDPS         | 1  | 1q22            | 155278539 | 155290457 | 0.0112 | 0.0772 | 0.5083 | 15 | 0  | 0 |
| TPR          | 1  | 1q31.1          | 186280788 | 186344825 | 0.0112 | 0.0772 | 0.5083 | 17 | 0  | 1 |
| HSPBAP1      | 3  | 3q21.1          | 122458846 | 122512650 | 0.0112 | 0.0772 | 0.5083 | 7  | 3  | 0 |
| MRRF         | 9  | 9q33.2          | 125026935 | 125085743 | 0.0112 | 0.0772 | 0.5083 | 2  | 8  | 0 |
| CLCN6        | 1  | 1p36.22         | 11866207  | 11908136  | 0.0112 | 0.0772 | 0.5083 | 1  | 11 | 0 |
| DIO1         | 1  | 1p32.3          | 54359861  | 54376759  | 0.0112 | 0.0771 | 0.5084 | 6  | 7  | 0 |
| CR2          | 1  | 1q21.3          | 153920151 | 153931101 | 0.0112 | 0.0771 | 0.5085 | 15 | 1  | 0 |
| CGB7         | 19 | 19q13.33        | 49557548  | 49559036  | 0.0112 | 0.0771 | 0.5085 | 3  | 9  | 0 |
| OCLAD1       | 4  | 4p11            | 48833015  | 48863831  | 0.0112 | 0.0770 | 0.5086 | 0  | 9  | 0 |
| FDXACB1      | 11 | 11q23.1         | 111652919 | 111750153 | 0.0111 | 0.0769 | 0.5087 | 5  | 2  | 0 |
| PNXA1        | 3  | 3q21.1          | 122140748 | 122233786 | 0.0111 | 0.0769 | 0.5087 | 7  | 3  | 0 |
| NAGA         | 22 | 22q13.2         | 42428724  | 42466846  | 0.0111 | 0.0769 | 0.5087 | 2  | 6  | 0 |
| CALCRL       | 2  | 2q32.1          | 188207854 | 188313187 | 0.0111 | 0.0769 | 0.5088 | 4  | 2  | 0 |
| AC018892.4   | 2  | 2q11.2          | 97691712  | 97697373  | 0.0111 | 0.0769 | 0.5088 | 7  | 3  | 1 |
| MARCH7       | 2  | 2q24.2          | 160569000 | 160625083 | 0.0111 | 0.0769 | 0.5088 | 5  | 4  | 0 |
| PITPNB       | 22 | 22q12.1         | 28247658  | 28316122  | 0.0111 | 0.0768 | 0.5089 | 2  | 10 | 0 |
| ZBTB45       | 19 | 19q13.43        | 59024899  | 59030921  | 0.0111 | 0.0767 | 0.5090 | 2  | 5  | 0 |
| C15orf51     | 15 | 15q26.3         | 100330361 | 100347132 | 0.0111 | 0.0766 | 0.5091 | 13 | 2  | 0 |
| SOCS1        | 16 | 16p13.13        | 11348274  | 11350039  | 0.0111 | 0.0766 | 0.5091 | 3  | 4  | 0 |
| SEPT4        | 17 | 17q22           | 56597616  | 56616574  | 0.0110 | 0.0764 | 0.5093 | 6  | 4  | 0 |
| ACVR2A       | 2  | 2q22.3          | 148602185 | 148688393 | 0.0110 | 0.0764 | 0.5093 | 5  | 7  | 0 |
| SFRS16       | 19 | 19q13.32        | 45542298  | 45574213  | 0.0110 | 0.0764 | 0.5093 | 3  | 6  | 0 |
| LMO4         | 1  | 1p22.3          | 87794151  | 87814604  | 0.0110 | 0.0764 | 0.5093 | 6  | 8  | 1 |
| PSMA5        | 1  | 1p13.3          | 109944474 | 109969066 | 0.0110 | 0.0764 | 0.5093 | 4  | 5  | 0 |
| MEGF9        | 9  | 9q33.2          | 123363091 | 123476636 | 0.0110 | 0.0763 | 0.5094 | 3  | 7  | 0 |
| GIMAP8       | 7  | 7q36.1          | 150147962 | 150176480 | 0.0110 | 0.0763 | 0.5095 | 12 | 1  | 0 |
| STAG1        | 3  | 3q22.3          | 136055999 | 136471245 | 0.0110 | 0.0762 | 0.5095 | 7  | 0  | 0 |
| SF3B3        | 16 | 16q22.1         | 70557701  | 70606200  | 0.0110 | 0.0762 | 0.5095 | 6  | 7  | 0 |
| AL137003.12  | 6  | 6p22.3          | 16737085  | 16761721  | 0.0110 | 0.0762 | 0.5095 | 9  | 2  | 0 |
| BZW2         | 7  | 7p21.1          | 16685756  | 16746148  | 0.0110 | 0.0762 | 0.5096 | 4  | 4  | 0 |
| C21orf70     | 21 | 21q22.3         | 46359940  | 46396887  | 0.0110 | 0.0761 | 0.5097 | 7  | 6  | 0 |
| ERCC1        | 19 | 19q13.32        | 45912872  | 45927177  | 0.0109 | 0.0760 | 0.5098 | 3  | 7  | 0 |
| VPS13A       | 9  | 9q21.2          | 79792361  | 80032399  | 0.0109 | 0.0760 | 0.5098 | 3  | 6  | 0 |
| CAD          | 2  | 2p23.3          | 27440258  | 27466654  | 0.0109 | 0.0757 | 0.5100 | 5  | 1  | 0 |
| ILIR1L2      | 2  | 2q12.1          | 102803433 | 102855511 | 0.0109 | 0.0757 | 0.5100 | 5  | 5  | 1 |
| SIP1         | 14 | 14q21.1         | 395583488 | 39606175  | 0.0108 | 0.075  |        |    |    |   |

Supplementary Table 6  
Page 15

|           |    |                |           |           |        |        |        |    |    |   |
|-----------|----|----------------|-----------|-----------|--------|--------|--------|----|----|---|
| CWF19L2   | 11 | 11q22.3        | 107197074 | 107328572 | 0.0099 | 0.0709 | 0.5156 | 4  | 4  | 0 |
| MTCH2     | 11 | 11p11.2        | 47638858  | 47664206  | 0.0099 | 0.0709 | 0.5156 | 1  | 2  | 0 |
| RASA2     | 3  | 3q23           | 141205891 | 141331621 | 0.0099 | 0.0707 | 0.5158 | 13 | 0  | 0 |
| IRF2BP2   | 1  | 1q42.3         | 234740017 | 234745271 | 0.0099 | 0.0706 | 0.5159 | 20 | 1  | 2 |
| ETV6      | 12 | 12p13.2        | 11802788  | 12048321  | 0.0099 | 0.0706 | 0.5159 | 8  | 5  | 0 |
| INADL     | 1  | 1p31.3         | 62208149  | 62629592  | 0.0099 | 0.0706 | 0.5159 | 7  | 2  | 0 |
| SYTL5     | 23 | 23p11.4        | 37865835  | 37988069  | 0.0099 | 0.0706 | 0.5159 | 4  | 10 | 1 |
| FUBP3     | 9  | 9q34.11-q34.12 | 133454960 | 133513739 | 0.0098 | 0.0705 | 0.5160 | 3  | 7  | 0 |
| RNFT2     | 12 | 12q24.22       | 117176096 | 117291434 | 0.0098 | 0.0705 | 0.5160 | 3  | 9  | 0 |
| AKAP10    | 17 | 17p11.2        | 19808752  | 19881129  | 0.0098 | 0.0704 | 0.5161 | 0  | 11 | 0 |
| SMU1      | 9  | 9p21.1         | 33041850  | 33076714  | 0.0098 | 0.0703 | 0.5162 | 3  | 8  | 0 |
| AHNAK     | 11 | 11q12.3        | 62201016  | 62314332  | 0.0098 | 0.0703 | 0.5163 | 1  | 1  | 0 |
| R3HCC1    | 8  | 8p21.3         | 23145442  | 23153791  | 0.0098 | 0.0703 | 0.5163 | 0  | 13 | 0 |
| NOP56     | 20 | 20p13          | 2633178   | 2638976   | 0.0098 | 0.0702 | 0.5163 | 2  | 7  | 0 |
| NIN       | 14 | 14q22.1        | 51186481  | 51297847  | 0.0098 | 0.0702 | 0.5164 | 4  | 8  | 0 |
| PPIL5     | 14 | 14q21.3        | 50065415  | 50081389  | 0.0098 | 0.0702 | 0.5165 | 4  | 7  | 0 |
| ZNF408    | 11 | 11p11.2        | 46722368  | 46727461  | 0.0098 | 0.0700 | 0.5166 | 1  | 2  | 0 |
| LRRIC1    | 6  | 6p12.1         | 53659778  | 53788919  | 0.0097 | 0.0700 | 0.5166 | 9  | 1  | 0 |
| KATNA1    | 6  | 6q25.1         | 149916013 | 149970108 | 0.0097 | 0.0699 | 0.5167 | 3  | 8  | 0 |
| ATF2      | 2  | 2q31.1         | 175936978 | 176033110 | 0.0097 | 0.0699 | 0.5168 | 6  | 3  | 0 |
| FAM63B    | 15 | 15q21.3-q22.1  | 59063393  | 59149732  | 0.0097 | 0.0699 | 0.5168 | 1  | 6  | 0 |
| C1RL      | 12 | 12p13.31       | 7247153   | 7261793   | 0.0097 | 0.0698 | 0.5169 | 10 | 3  | 0 |
| CHMP4B    | 20 | 20q11.22       | 32399119  | 32442169  | 0.0097 | 0.0696 | 0.5171 | 0  | 3  | 0 |
| CECR5     | 22 | 22q11.1        | 17618411  | 17646177  | 0.0096 | 0.0694 | 0.5173 | 1  | 6  | 0 |
| NIP7      | 16 | 16q22.1        | 69373546  | 69377009  | 0.0096 | 0.0694 | 0.5173 | 6  | 7  | 0 |
| SIRT1     | 10 | 10q21.3        | 69644427  | 69678147  | 0.0096 | 0.0693 | 0.5174 | 3  | 2  | 0 |
| VAC14     | 16 | 16q22.1-q22.2  | 70721344  | 70835071  | 0.0096 | 0.0693 | 0.5174 | 7  | 5  | 0 |
| FKBP10    | 17 | 17q21.2        | 39968962  | 39979469  | 0.0096 | 0.0691 | 0.5176 | 2  | 11 | 0 |
| TMC01     | 1  | 1q24.1         | 165693530 | 165738135 | 0.0096 | 0.0691 | 0.5176 | 15 | 0  | 0 |
| NIPSNAP3A | 9  | 9q31.1         | 107509989 | 107522405 | 0.0096 | 0.0691 | 0.5176 | 2  | 6  | 0 |
| NIF507    | 19 | 19q13.11       | 32836514  | 32878572  | 0.0096 | 0.0691 | 0.5177 | 4  | 2  | 1 |
| BSDC1     | 1  | 1p35.1         | 32830707  | 32860062  | 0.0096 | 0.0690 | 0.5178 | 2  | 9  | 0 |
| ARFIP1    | 4  | 4q31.3         | 153701112 | 153833064 | 0.0095 | 0.0690 | 0.5178 | 1  | 8  | 0 |
| RPLP1     | 15 | 15q23          | 69745159  | 69747884  | 0.0095 | 0.0688 | 0.5180 | 5  | 5  | 0 |
| OSBPL11   | 3  | 3q21.2         | 125247713 | 125314381 | 0.0095 | 0.0688 | 0.5180 | 5  | 4  | 0 |
| PARK7     | 1  | 1p36.23        | 8021714   | 8045341   | 0.0095 | 0.0688 | 0.5180 | 1  | 11 | 0 |
| AIDA      | 1  | 1q41           | 222841357 | 222885864 | 0.0095 | 0.0688 | 0.5180 | 17 | 1  | 1 |
| DIS3L2    | 2  | 2q37.1         | 232826293 | 233208613 | 0.0095 | 0.0687 | 0.5181 | 1  | 10 | 0 |
| C12orf96  | 17 | 17q12          | 36827961  | 36831187  | 0.0095 | 0.0686 | 0.5183 | 3  | 9  | 0 |
| MAFG      | 17 | 17q25.3        | 79876149  | 79885588  | 0.0095 | 0.0686 | 0.5183 | 10 | 5  | 0 |
| ZNF559    | 19 | 19p13.2        | 9434873   | 9454519   | 0.0095 | 0.0685 | 0.5184 | 1  | 4  | 0 |
| EXOC8     | 1  | 1q42.2         | 231468480 | 231473598 | 0.0095 | 0.0685 | 0.5184 | 21 | 0  | 1 |
| KIF2C     | 1  | 1p34.1         | 45205490  | 45233439  | 0.0094 | 0.0683 | 0.5186 | 3  | 2  | 0 |
| RANBP9    | 6  | 6p23           | 13621735  | 13711953  | 0.0094 | 0.0682 | 0.5187 | 13 | 2  | 0 |
| TBCE      | 1  | 1q42.3         | 235530728 | 235612278 | 0.0094 | 0.0682 | 0.5187 | 20 | 0  | 1 |
| POLC2     | 1  | 1p36.13        | 19638740  | 19655793  | 0.0094 | 0.0682 | 0.5188 | 2  | 14 | 0 |
| PLBD1     | 12 | 12p13.1        | 14656597  | 14720791  | 0.0094 | 0.0682 | 0.5188 | 6  | 5  | 0 |
| IFI16     | 1  | 1q23.1         | 158969758 | 159024943 | 0.0094 | 0.0681 | 0.5190 | 19 | 0  | 2 |
| CPSF3     | 2  | 2p25.1         | 9563793   | 9613227   | 0.0094 | 0.0681 | 0.5190 | 5  | 2  | 0 |
| STT3A     | 11 | 11q24.2        | 125462739 | 125491280 | 0.0094 | 0.0681 | 0.5190 | 4  | 5  | 0 |
| RPS6KA5   | 14 | 14q32.11       | 91337172  | 91526993  | 0.0094 | 0.0681 | 0.5190 | 2  | 10 | 0 |
| GRSF1     | 4  | 4q13.3         | 71681504  | 71705627  | 0.0094 | 0.0681 | 0.5190 | 5  | 3  | 0 |
| FRYL      | 4  | 4p11           | 48499380  | 48782316  | 0.0093 | 0.0681 | 0.5191 | 2  | 6  | 0 |
| SLC25A13  | 7  | 7q21.3         | 95749533  | 95951459  | 0.0093 | 0.0681 | 0.5191 | 7  | 0  | 0 |
| TRIM32    | 9  | 9q33.1         | 119449581 | 119463579 | 0.0093 | 0.0679 | 0.5193 | 2  | 9  | 0 |
| DRHX7     | 2  | 2p22.1         | 39024877  | 39103075  | 0.0093 | 0.0679 | 0.5194 | 5  | 1  | 0 |
| TRIM37    | 17 | 17q22          | 57060002  | 57184266  | 0.0093 | 0.0677 | 0.5196 | 5  | 4  | 0 |
| ANKRD57   | 2  | 2q13.3         | 110371811 | 110376563 | 0.0092 | 0.0674 | 0.5198 | 3  | 7  | 1 |
| TMEM161A  | 19 | 19p13.11       | 19230429  | 19249270  | 0.0092 | 0.0674 | 0.5198 | 4  | 3  | 1 |
| SIAM2     | 3  | 3q25.1         | 150458921 | 150481263 | 0.0092 | 0.0672 | 0.5201 | 13 | 0  | 0 |
| WDR89     | 14 | 14q23.2        | 64063757  | 64108125  | 0.0092 | 0.0670 | 0.5202 | 1  | 9  | 0 |
| MAPK10    | 4  | 4q21.3         | 86937631  | 87374296  | 0.0092 | 0.0670 | 0.5203 | 3  | 4  | 0 |
| BET3L     | 6  | 6q22.1         | 116816150 | 116866677 | 0.0092 | 0.0670 | 0.5203 | 7  | 2  | 0 |
| POLR3E    | 16 | 16p12.2        | 22308741  | 22345339  | 0.0091 | 0.0670 | 0.5203 | 0  | 4  | 0 |
| RBM22     | 5  | 5q33.1         | 150070356 | 150080624 | 0.0091 | 0.0670 | 0.5203 | 0  | 14 | 0 |
| THAP6     | 4  | 4q21.1         | 76439654  | 76465137  | 0.0091 | 0.0670 | 0.5204 | 3  | 3  | 0 |
| POLS      | 5  | 5p15.31        | 6714718   | 6757161   | 0.0091 | 0.0670 | 0.5204 | 8  | 5  | 1 |
| AKAP6     | 14 | 14q12-q13.1    | 32798479  | 33302267  | 0.0091 | 0.0669 | 0.5205 | 4  | 4  | 0 |
| ZNF281    | 1  | 1q32.1         | 200375430 | 200379166 | 0.0091 | 0.0669 | 0.5205 | 15 | 2  | 1 |
| CDK4      | 12 | 12q14.1        | 58142005  | 58146164  | 0.0091 | 0.0669 | 0.5205 | 1  | 8  | 0 |
| CITED4    | 1  | 1p34.2         | 41326729  | 41328018  | 0.0091 | 0.0669 | 0.5205 | 2  | 3  | 0 |
| MYH14     | 19 | 19q13.33       | 50706885  | 50813799  | 0.0091 | 0.0668 | 0.5206 | 3  | 6  | 0 |
| C6orf192  | 6  | 6q23.2         | 133090507 | 133119747 | 0.0091 | 0.0668 | 0.5207 | 8  | 3  | 1 |
| ZNRF2     | 7  | 7p14.3         | 30323923  | 30452118  | 0.0091 | 0.0668 | 0.5207 | 4  | 7  | 0 |
| ZNF493    | 19 | 19p12          | 21579921  | 21610284  | 0.0091 | 0.0668 | 0.5207 | 6  | 3  | 0 |
| PILRB     | 7  | 7q22.1         | 99933737  | 99965454  | 0.0091 | 0.0667 | 0.5208 | 4  | 3  | 0 |
| PLCH1     | 3  | 3q25.31        | 155197671 | 155421997 | 0.0091 | 0.0667 | 0.5208 | 13 | 0  | 0 |
| AMN1      | 12 | 12p11.21       | 31824073  | 31882108  | 0.0091 | 0.0667 | 0.5209 | 5  | 4  | 0 |
| NRSN2     | 20 | 20p13          | 327370    | 335511    | 0.0091 | 0.0667 | 0.5209 | 2  | 6  | 1 |
| RECQL     | 12 | 12p12.1        | 21621845  | 21657515  | 0.0090 | 0.0666 | 0.5210 | 7  | 4  | 0 |
| BBS7      | 4  | 4q27           | 122745639 | 122791642 | 0.0090 | 0.0666 | 0.5210 | 4  | 2  | 0 |
| LPHN1     | 19 | 19p13.12       | 14258547  | 14316972  | 0.0090 | 0.0665 | 0.5211 | 5  | 3  | 0 |
| C4orf29   | 4  | 4q28.2         | 128886435 | 128957474 | 0.0090 | 0.0665 | 0.5211 | 5  | 2  | 0 |
| CYTH1     | 17 | 17q25.3        | 76670130  | 76778379  | 0.0090 | 0.0664 | 0.5212 | 11 | 4  | 0 |
| HS2T1     | 1  | 1p22.3         | 87380335  | 87634887  | 0.0090 | 0.0664 | 0.5212 | 6  | 8  | 1 |
| DNAJC3    | 13 | 13q32.1        | 96329402  | 96447241  | 0.0090 | 0.0663 | 0.5214 | 9  | 4  | 0 |
| POLR3GL   | 1  | 1q21.1         | 145456236 | 145470387 | 0.0090 | 0.0661 | 0.5216 | 16 | 1  | 0 |
| SSBP3     | 1  | 1p32.3         | 54692195  | 54872092  | 0.0089 | 0.0660 | 0.5217 | 6  | 7  | 0 |
| MR1       | 19 | 19p13.2        | 13875337  | 13885096  | 0.0089 | 0.0660 | 0.5217 | 5  | 3  | 0 |
| SUPV3L1   | 10 | 10q22.1        | 70939993  | 70968847  | 0.0089 | 0.0659 | 0.5218 | 1  | 2  | 0 |
| REEP4     | 8  | 8p21.3         | 21995533  | 21999448  | 0.0089 | 0.0659 | 0.5219 | 0  | 12 | 0 |
| SH2D2A    | 1  | 1q23.1         | 156776036 | 156786602 | 0.0089 | 0.0659 | 0.5219 | 16 | 0  | 1 |
| E2F3      | 6  | 6p22.3         | 20402137  | 20493945  | 0.0089 | 0.0659 | 0.5219 | 8  | 0  | 0 |
| ECHDC1    | 6  | 6q22.33        | 127609861 | 127664754 | 0.0089 | 0.0657 | 0.5221 | 11 | 3  | 1 |
| ST7L      | 1  | 1p13.2         | 113066143 | 113162040 | 0.0089 | 0.0657 | 0.5221 | 5  | 5  | 0 |
| FAM63A    | 1  | 1q21.3         | 150967549 | 150979333 | 0.0089 | 0.0657 | 0.5221 | 16 | 1  | 0 |
| NCKAP1    | 2  | 2q32.1         | 183789612 | 183903586 | 0.0089 | 0.0657 | 0.5221 | 6  | 2  | 0 |
| CYB5B     | 17 | 17q23.3        | 61509668  | 61523722  | 0.0089 | 0.0657 | 0.5221 | 6  | 3  | 0 |
| GRK6      | 5  | 5q35.3         | 176853687 | 176869850 | 0.0089 | 0.0657 | 0.5221 | 4  | 6  | 0 |
| SEC62     | 3  | 3q26.2         | 169684580 | 169716161 | 0.0088 | 0.0657 | 0.5223 | 15 | 0  | 1 |
| SLC35B1   | 17 | 17q21.33       | 47778682  | 47785526  | 0.0088 | 0.0657 | 0.5223 | 1  | 7  | 0 |
| LMNB2     | 19 | 19p13.3        | 2428165   | 2456958   | 0.0088 | 0.0657 | 0.5223 | 1  | 6  | 0 |
| PCM1      | 8  | 8p22           | 17780366  | 17887453  | 0.0088 | 0.0657 | 0.5223 | 1  | 10 | 0 |
| ZNF254    | 19 | 19p12          | 24269976  | 24312643  | 0.0088 | 0.0657 | 0.5223 | 6  | 4  | 0 |
| STAG3L4   | 7  | 7q11.21        | 66767624  | 66786513  | 0.0088 | 0.0657 | 0.5223 | 3  | 5  | 1 |
| FAM62A    | 12 | 12q13.2        | 56522054  | 56538452  | 0.0088 | 0.0656 | 0.5224 | 1  | 7  | 0 |
| SEC11L3   | 18 | 18q21.32       | 56807125  | 56826061  | 0.0088 | 0.0656 | 0.5224 | 2  | 8  | 0 |
| CDK6      | 7  | 7q21.2         | 92234239  | 92465941  | 0.0088 | 0.0654 | 0.5227 | 9  | 0  | 1 |
| NDNL2     | 15 | 15q13.1        | 29560353  | 29562033  | 0.0088 | 0.0654 | 0.5227 | 0  | 8  | 0 |
| FAM151B   | 5  | 5q14.1         | 79783800  | 79838206  | 0.0088 | 0.0653 | 0.5228 | 0  | 14 | 0 |
| NUP155    | 5  | 5p13.2         | 37291941  | 37371197  | 0.0087 | 0.0652 | 0.5229 | 6  | 3  | 0 |
| SDAD1     | 4  | 4q21.1         | 76971059  | 76912113  | 0.0087 | 0.0649 | 0.5232 | 3  | 3  | 0 |
| CPN2      | 16 | 16q13          | 57126506  | 57181876  | 0.0087 | 0.0648 | 0.5232 | 3  | 9  | 0 |
| CY22DA1   | 2  | 2q33.2         | 204103174 | 204117053 | 0.0087 | 0.0648 | 0.5233 | 2  | 6  |   |

Supplementary Table 6  
Page 16

|              |    |                 |          |           |           |        |        |        |    |    |   |
|--------------|----|-----------------|----------|-----------|-----------|--------|--------|--------|----|----|---|
| GRIN3A       | 9  |                 | 9q31.1   | 104331634 | 104500862 | 0.0081 | 0.0618 | 0.5275 | 2  | 6  | 0 |
| NMT2         | 10 |                 | 10p1.3   | 15132913  | 15210695  | 0.0081 | 0.0617 | 0.5276 | 9  | 2  | 1 |
| KAT2A        | 17 |                 | 17q21.2  | 40265129  | 40273382  | 0.0081 | 0.0617 | 0.5276 | 1  | 11 | 0 |
| TIPRL        | 1  |                 | 1q24.2   | 168148171 | 168171352 | 0.0081 | 0.0617 | 0.5276 | 16 | 1  | 1 |
| GRAMD1A      | 19 | 19q13.11-q13.12 |          | 35486927  | 35517373  | 0.0081 | 0.0617 | 0.5277 | 4  | 2  | 0 |
| CTH          | 1  |                 | 1p31.1   | 70876955  | 70905252  | 0.0080 | 0.0616 | 0.5278 | 6  | 4  | 0 |
| TLE1         | 9  |                 | 9q21.32  | 84198603  | 84303596  | 0.0080 | 0.0615 | 0.5279 | 4  | 6  | 0 |
| NDFIP2       | 13 |                 | 13q31.1  | 80055339  | 80130210  | 0.0080 | 0.0615 | 0.5280 | 6  | 3  | 0 |
| GCLC         | 6  |                 | 6p12.1   | 53362139  | 53409831  | 0.0080 | 0.0613 | 0.5282 | 10 | 1  | 0 |
| ARHGAP10     | 4  |                 | 4q31.23  | 148653453 | 148993926 | 0.0079 | 0.0610 | 0.5285 | 3  | 6  | 0 |
| TOMM6        | 6  |                 | 6p21.1   | 41755181  | 41757632  | 0.0079 | 0.0609 | 0.5286 | 13 | 1  | 0 |
| DDX54        | 12 |                 | 12q24.13 | 113594986 | 113623284 | 0.0079 | 0.0609 | 0.5286 | 3  | 8  | 0 |
| GRWD1        | 19 |                 | 19q13.33 | 48949062  | 48957154  | 0.0079 | 0.0609 | 0.5287 | 3  | 7  | 0 |
| MAPK14       | 6  |                 | 6p21.31  | 35995454  | 36079013  | 0.0079 | 0.0609 | 0.5287 | 11 | 0  | 0 |
| C17orf76     | 17 |                 | 17p11.2  | 16345328  | 16395480  | 0.0079 | 0.0608 | 0.5288 | 0  | 13 | 0 |
| GAB3         | 23 |                 | 23q28    | 153903531 | 153979348 | 0.0079 | 0.0608 | 0.5289 | 6  | 10 | 0 |
| SHANK2       | 11 | 11q13.3-q13.4   |          | 70313961  | 70963623  | 0.0079 | 0.0608 | 0.5289 | 9  | 2  | 1 |
| TADA3L       | 3  |                 | 3p25.3   | 9821648   | 9834695   | 0.0079 | 0.0608 | 0.5289 | 7  | 2  | 0 |
| NFRKB        | 11 |                 | 11q24.3  | 129733671 | 129762904 | 0.0079 | 0.0608 | 0.5289 | 4  | 5  | 0 |
| MBD4         | 3  |                 | 3q21.3   | 129149793 | 129158852 | 0.0079 | 0.0606 | 0.5291 | 6  | 2  | 0 |
| ZNF32        | 10 |                 | 10q11.21 | 44139308  | 44144326  | 0.0078 | 0.0605 | 0.5292 | 6  | 1  | 1 |
| SLC25A37     | 8  |                 | 8p21.2   | 23386363  | 23430063  | 0.0078 | 0.0605 | 0.5293 | 0  | 13 | 0 |
| NIPBL        | 5  |                 | 5p13.2   | 36876861  | 37065921  | 0.0078 | 0.0605 | 0.5293 | 8  | 3  | 0 |
| ATAD3A       | 1  |                 | 1p36.33  | 14475533  | 14700065  | 0.0078 | 0.0604 | 0.5294 | 2  | 8  | 0 |
| INTS9        | 8  |                 | 8p21.1   | 28625182  | 28747698  | 0.0078 | 0.0604 | 0.5294 | 2  | 12 | 0 |
| PAICS        | 4  |                 | 4q12     | 57301915  | 57327534  | 0.0078 | 0.0604 | 0.5295 | 4  | 5  | 0 |
| DUS3L        | 19 |                 | 19p13.3  | 5785151   | 5791194   | 0.0078 | 0.0604 | 0.5295 | 0  | 6  | 0 |
| AGXT2L2      | 5  |                 | 5q35.3   | 17763554  | 177659803 | 0.0078 | 0.0604 | 0.5295 | 5  | 5  | 0 |
| AFF4         | 5  |                 | 5q31.1   | 132211071 | 132299354 | 0.0078 | 0.0604 | 0.5295 | 2  | 16 | 0 |
| APLP2        | 11 |                 | 11q24.3  | 12939716  | 130014703 | 0.0078 | 0.0604 | 0.5295 | 4  | 6  | 0 |
| PLEKHG2      | 19 |                 | 19q13.2  | 39903750  | 39919054  | 0.0078 | 0.0603 | 0.5296 | 4  | 6  | 0 |
| CAGE1        | 6  |                 | 6p24.3   | 7326884   | 7389942   | 0.0078 | 0.0603 | 0.5296 | 9  | 3  | 0 |
| TMEM50A      | 1  |                 | 1p36.11  | 25664811  | 25688850  | 0.0078 | 0.0603 | 0.5297 | 0  | 12 | 0 |
| TMEM14C      | 6  |                 | 6p24.2   | 10723294  | 10731360  | 0.0077 | 0.0601 | 0.5299 | 10 | 4  | 0 |
| AP002478.3-1 | 18 |                 | 18p11.31 | 3594112   | 3598350   | 0.0077 | 0.0600 | 0.5300 | 6  | 5  | 0 |
| USP3         | 15 |                 | 15q22.31 | 63796810  | 63883659  | 0.0077 | 0.0599 | 0.5301 | 3  | 5  | 0 |
| EGF          | 4  |                 | 4q25     | 110834040 | 110933411 | 0.0077 | 0.0596 | 0.5304 | 3  | 3  | 0 |
| RPL7A        | 9  |                 | 9q34.2   | 136215069 | 136218281 | 0.0077 | 0.0595 | 0.5305 | 4  | 9  | 1 |
| LDLRAP1      | 1  |                 | 1p36.11  | 25870076  | 25895377  | 0.0076 | 0.0594 | 0.5307 | 1  | 12 | 0 |
| ZMAT5        | 22 |                 | 22q12.2  | 30126948  | 30162969  | 0.0076 | 0.0593 | 0.5308 | 2  | 7  | 0 |
| BRP44        | 1  |                 | 1q24.2   | 167887311 | 167906278 | 0.0076 | 0.0592 | 0.5310 | 16 | 1  | 0 |
| C13orf1      | 13 |                 | 13q14.2  | 50486842  | 50510626  | 0.0076 | 0.0590 | 0.5311 | 2  | 6  | 0 |
| OPA1         | 3  |                 | 3q29     | 193310933 | 193415599 | 0.0076 | 0.0589 | 0.5313 | 13 | 0  | 0 |
| C9orf80      | 9  |                 | 9q32     | 115448797 | 115480429 | 0.0075 | 0.0588 | 0.5313 | 2  | 8  | 0 |
| PDS5B        | 13 |                 | 13q13.1  | 33160592  | 33352157  | 0.0075 | 0.0587 | 0.5315 | 1  | 4  | 0 |
| HIF3A        | 19 |                 | 19q13.32 | 46800305  | 46846690  | 0.0075 | 0.0587 | 0.5316 | 3  | 9  | 0 |
| MOCOS        | 18 |                 | 18q12.2  | 33767480  | 33848684  | 0.0075 | 0.0586 | 0.5317 | 7  | 9  | 0 |
| ID4          | 6  |                 | 6p22.3   | 19837617  | 19840914  | 0.0075 | 0.0586 | 0.5317 | 8  | 0  | 0 |
| INTS6        | 13 |                 | 13q14.3  | 51935701  | 52027275  | 0.0075 | 0.0585 | 0.5317 | 2  | 6  | 0 |
| MRPS24       | 7  |                 | 7p13     | 43906157  | 43909145  | 0.0075 | 0.0585 | 0.5318 | 1  | 4  | 0 |
| CRISPLD2     | 16 |                 | 16q24.1  | 84853584  | 84943116  | 0.0075 | 0.0585 | 0.5318 | 3  | 9  | 0 |
| ARHGEF7      | 13 |                 | 13q34    | 111767624 | 111958078 | 0.0075 | 0.0585 | 0.5319 | 13 | 2  | 2 |
| PLEKH01      | 1  |                 | 1q21.2   | 150121373 | 150136916 | 0.0075 | 0.0585 | 0.5319 | 15 | 1  | 0 |
| ZFAND6       | 15 |                 | 15q25.1  | 80352021  | 80430712  | 0.0075 | 0.0585 | 0.5319 | 5  | 6  | 0 |
| YY1          | 14 |                 | 14q32.2  | 100705102 | 100744804 | 0.0075 | 0.0584 | 0.5320 | 2  | 10 | 0 |
| IL34         | 16 |                 | 16q22.1  | 46804668  | 46894584  | 0.0075 | 0.0584 | 0.5320 | 6  | 7  | 0 |
| GRIPAP1      | 23 |                 | 23p11.23 | 48930134  | 48958675  | 0.0074 | 0.0584 | 0.5321 | 2  | 13 | 0 |
| SMG5         | 1  |                 | 1q22     | 156219015 | 156252620 | 0.0074 | 0.0583 | 0.5322 | 15 | 0  | 0 |
| C9orf46      | 9  |                 | 9p24.1   | 5357873   | 5437878   | 0.0074 | 0.0583 | 0.5322 | 6  | 9  | 0 |
| ERF          | 19 |                 | 19q13.2  | 42751717  | 42759309  | 0.0074 | 0.0582 | 0.5323 | 3  | 7  | 0 |
| MCM5         | 22 |                 | 22q12.3  | 35796116  | 35820494  | 0.0074 | 0.0582 | 0.5323 | 1  | 8  | 0 |
| RANGAP1      | 22 |                 | 22q13.2  | 41641615  | 41698963  | 0.0074 | 0.0582 | 0.5323 | 2  | 6  | 0 |
| ENAH         | 1  |                 | 1q42.12  | 225674534 | 225840845 | 0.0074 | 0.0582 | 0.5324 | 17 | 0  | 0 |
| TOMM40       | 19 |                 | 19q13.32 | 45394477  | 45406935  | 0.0074 | 0.0582 | 0.5324 | 3  | 6  | 0 |
| EXOC4        | 7  |                 | 7q33     | 132937823 | 133750511 | 0.0074 | 0.0581 | 0.5325 | 10 | 1  | 0 |
| SEL1L        | 14 |                 | 14q31.1  | 81937893  | 82000133  | 0.0074 | 0.0580 | 0.5327 | 1  | 10 | 0 |
| NGLY1        | 3  |                 | 3p24.2   | 25760436  | 25831530  | 0.0073 | 0.0577 | 0.5330 | 8  | 5  | 0 |
| ITGAV        | 2  |                 | 2q32.1   | 187454790 | 187545627 | 0.0073 | 0.0577 | 0.5330 | 5  | 2  | 0 |
| UBE2D2       | 5  |                 | 5q31.2   | 138940751 | 139008016 | 0.0073 | 0.0577 | 0.5331 | 0  | 11 | 0 |
| SIPA1L3      | 19 |                 | 19q13.13 | 38397868  | 38699009  | 0.0073 | 0.0577 | 0.5331 | 4  | 4  | 1 |
| C1orf114     | 1  |                 | 1q24.2   | 169364114 | 169396700 | 0.0073 | 0.0576 | 0.5332 | 17 | 1  | 1 |
| UBXN7        | 3  |                 | 3q29     | 196080371 | 196159345 | 0.0073 | 0.0576 | 0.5332 | 8  | 1  | 0 |
| C1orf85      | 1  |                 | 1q22     | 156248142 | 156265463 | 0.0073 | 0.0576 | 0.5332 | 15 | 0  | 0 |
| RPL30        | 8  |                 | 8q22.2   | 99053954  | 99059858  | 0.0073 | 0.0576 | 0.5332 | 18 | 0  | 1 |
| KIAA0586     | 14 |                 | 14q23.1  | 58894120  | 59015546  | 0.0073 | 0.0574 | 0.5334 | 2  | 9  | 0 |
| SP1          | 12 |                 | 12q13.13 | 53773979  | 53810221  | 0.0073 | 0.0574 | 0.5334 | 0  | 11 | 0 |
| KIF3B        | 20 |                 | 20q11.21 | 30865467  | 30922807  | 0.0073 | 0.0573 | 0.5336 | 1  | 3  | 0 |
| ANKZF1       | 2  |                 | 2q35     | 220094479 | 220101391 | 0.0072 | 0.0573 | 0.5337 | 3  | 6  | 0 |
| GREM1        | 15 |                 | 15q13.3  | 33010205  | 33026866  | 0.0072 | 0.0573 | 0.5337 | 0  | 9  | 0 |
| CGN          | 1  |                 | 1q21.3   | 151483862 | 151511165 | 0.0072 | 0.0573 | 0.5337 | 16 | 1  | 0 |
| RAVER2       | 1  |                 | 1p31.3   | 65210778  | 65298912  | 0.0072 | 0.0571 | 0.5338 | 6  | 2  | 0 |
| PSMB2        | 1  |                 | 1p34.3   | 36035414  | 36107143  | 0.0072 | 0.0571 | 0.5339 | 0  | 6  | 0 |
| MCC          | 5  |                 | 5q22.2   | 112357796 | 112824527 | 0.0072 | 0.0571 | 0.5339 | 0  | 13 | 0 |
| C17orf47     | 17 |                 | 17q22    | 56818948  | 56821683  | 0.0072 | 0.0570 | 0.5341 | 6  | 4  | 0 |
| NEIL3        | 4  |                 | 4q34.3   | 178239891 | 178294092 | 0.0072 | 0.0570 | 0.5341 | 3  | 6  | 0 |
| TMPO         | 12 |                 | 12q23.1  | 38990405  | 38994287  | 0.0072 | 0.0570 | 0.5341 | 1  | 1  | 0 |
| MAP4K5       | 14 | 14q21.3-q22.1   |          | 50885249  | 50959376  | 0.0072 | 0.0570 | 0.5342 | 5  | 7  | 0 |
| CTBP2        | 10 |                 | 10q26.13 | 126676418 | 126849624 | 0.0072 | 0.0569 | 0.5342 | 5  | 9  | 0 |
| KDM2B        | 12 |                 | 12q24.31 | 121866902 | 122018889 | 0.0072 | 0.0569 | 0.5343 | 2  | 6  | 0 |
| CLEC4A       | 12 |                 | 12p13.31 | 8276226   | 8291203   | 0.0072 | 0.0569 | 0.5343 | 7  | 3  | 0 |
| DPM1         | 20 |                 | 20q13.13 | 49551412  | 49575087  | 0.0071 | 0.0569 | 0.5343 | 7  | 4  | 0 |
| PARP6        | 15 |                 | 15q23    | 72533523  | 72563628  | 0.0071 | 0.0568 | 0.5344 | 5  | 5  | 0 |
| FBL          | 19 |                 | 19q13.2  | 40325094  | 40337054  | 0.0071 | 0.0568 | 0.5345 | 3  | 7  | 0 |
| TH1L         | 20 |                 | 20q13.32 | 57556311  | 57570186  | 0.0071 | 0.0567 | 0.5345 | 9  | 5  | 0 |
| PROK2        | 3  |                 | 3p13     | 71820806  | 71834357  | 0.0071 | 0.0567 | 0.5346 | 3  | 9  | 0 |
| TRMT11       | 6  |                 | 6q22.32  | 126307576 | 126360418 | 0.0071 | 0.0566 | 0.5347 | 11 | 2  | 1 |
| CBX3         | 7  |                 | 7p15.2   | 26241099  | 26252976  | 0.0071 | 0.0565 | 0.5348 | 4  | 7  | 0 |
| ZNF33A       | 10 |                 | 10p11.1  | 38299578  | 38353045  | 0.0071 | 0.0565 | 0.5348 | 7  | 1  | 0 |
| TRIM38       | 6  |                 | 6p22.2   | 25963275  | 25985348  | 0.0071 | 0.0565 | 0.5348 | 8  | 0  | 0 |
| PLK4         | 4  |                 | 4q28.2   | 128802045 | 128820350 | 0.0071 | 0.0564 | 0.5350 | 5  | 2  | 0 |
| SCAMP1       | 5  |                 | 5q14.1   | 77656339  | 77776562  | 0.0071 | 0.0563 | 0.5351 | 0  | 15 | 0 |
| SNRNP48      | 6  |                 | 6p24.3   | 7590432   | 7612200   | 0.0071 | 0.0563 | 0.5351 | 9  | 3  | 0 |
| ARPC3        | 12 |                 | 12q24.11 | 110872707 | 110891802 | 0.0070 | 0.0563 | 0.5351 | 2  | 7  | 0 |
| TMEM79       | 1  |                 | 1q22     | 156252739 | 156262234 | 0.0070 | 0.0563 | 0.5352 | 15 | 0  | 0 |
| PICALM       | 11 |                 | 11q14.2  | 85668486  | 85780144  | 0.0070 | 0.0561 | 0.5354 | 6  | 3  | 0 |
| AC021649.18  | 3  |                 | 3q26.1   | 160801671 | 160823160 | 0.0070 | 0.0561 | 0.5354 | 16 | 0  | 1 |
| RBM39        | 20 |                 | 20q11.22 | 34291533  | 34330196  | 0.0070 | 0.0561 | 0.5354 | 0  | 6  | 0 |
| CITED2       | 6  |                 | 6q24.1   | 139693396 | 139695785 | 0.0070 | 0.0560 | 0.5355 | 7  | 3  | 1 |
| GIGYF2       | 2  |                 | 2q37.1   | 233562015 | 233725285 | 0.0070 | 0.0560 | 0.5356 | 1  | 10 | 0 |
| IFRD1        | 7  |                 | 7q31.1   | 112063023 | 112116244 | 0.0070 | 0.0559 |        |    |    |   |

Supplementary Table 6  
Page 17

|            |    |  |                |           |           |        |        |        |    |    |   |
|------------|----|--|----------------|-----------|-----------|--------|--------|--------|----|----|---|
| MITD1      | 2  |  | 2q11.2         | 99778410  | 99797513  | 0.0063 | 0.0524 | 0.5410 | 4  | 5  | 1 |
| ACLY       | 17 |  | 17q21.2        | 40023184  | 40075272  | 0.0063 | 0.0524 | 0.5410 | 2  | 11 | 0 |
| ATXN7L1    | 7  |  | 7q22.3         | 105245221 | 105517031 | 0.0063 | 0.0524 | 0.5411 | 8  | 3  | 0 |
| ALMS1P     | 2  |  | 2p13.1         | 73867998  | 73912703  | 0.0063 | 0.0523 | 0.5412 | 3  | 2  | 0 |
| CRY1       | 12 |  | 12q23.3        | 107385145 | 107487598 | 0.0063 | 0.0523 | 0.5412 | 2  | 9  | 0 |
| EIF4E2     | 2  |  | 2q37.1         | 233415357 | 233448354 | 0.0063 | 0.0522 | 0.5413 | 1  | 10 | 0 |
| DMTF1      | 7  |  | 7q21.12        | 86781677  | 86825648  | 0.0063 | 0.0522 | 0.5413 | 8  | 0  | 0 |
| USP22      | 17 |  | 17p11.2        | 20902906  | 20946369  | 0.0063 | 0.0522 | 0.5414 | 0  | 12 | 0 |
| GYG2       | 23 |  | 23p22.33       | 2746863   | 2800858   | 0.0063 | 0.0522 | 0.5414 | 4  | 13 | 0 |
| ZNF704     | 8  |  | 8q21.13        | 81550769  | 81787016  | 0.0063 | 0.0522 | 0.5414 | 12 | 1  | 2 |
| CABC1      | 1  |  | 1q42.13        | 227085237 | 227175246 | 0.0063 | 0.0521 | 0.5415 | 18 | 0  | 1 |
| WDR74      | 11 |  | 11q12.3        | 62600384  | 62607133  | 0.0063 | 0.0521 | 0.5416 | 1  | 2  | 0 |
| TXNDC9     | 2  |  | 2q11.2         | 99935489  | 99957165  | 0.0063 | 0.0520 | 0.5418 | 4  | 5  | 1 |
| TRAPPC2    | 23 |  | 23p22.2        | 13730363  | 13752742  | 0.0062 | 0.0519 | 0.5418 | 5  | 10 | 0 |
| AASDH      | 4  |  | 4q12           | 57204459  | 57253655  | 0.0062 | 0.0519 | 0.5418 | 4  | 5  | 0 |
| HIVEP1     | 6  |  | 6p24.1         | 12012571  | 12165232  | 0.0062 | 0.0519 | 0.5419 | 11 | 3  | 0 |
| SS18L1     | 20 |  | 20q13.33       | 60718822  | 60757563  | 0.0062 | 0.0518 | 0.5420 | 7  | 7  | 0 |
| PRNP       | 20 |  | 20p13          | 4666797   | 4690360   | 0.0062 | 0.0518 | 0.5420 | 2  | 8  | 0 |
| SMYD4      | 17 |  | 17p13.3        | 1682832   | 1733175   | 0.0062 | 0.0518 | 0.5421 | 1  | 10 | 0 |
| MPV17L     | 16 |  | 16p13.11       | 15489611  | 15503543  | 0.0062 | 0.0517 | 0.5421 | 4  | 2  | 0 |
| CAPN7      | 3  |  | 3p25.1         | 15247659  | 15294422  | 0.0062 | 0.0517 | 0.5422 | 6  | 3  | 0 |
| ZNF316     | 7  |  | 7p22.1         | 6676953   | 6694242   | 0.0062 | 0.0517 | 0.5422 | 3  | 1  | 0 |
| EIF3G      | 19 |  | 19p13.2        | 10225690  | 10230599  | 0.0062 | 0.0517 | 0.5422 | 2  | 4  | 0 |
| SLC12A4    | 16 |  | 16q22.1        | 67978230  | 68002525  | 0.0062 | 0.0516 | 0.5424 | 6  | 7  | 0 |
| ZCCHC7     | 9  |  | 9p13.2         | 37120469  | 37361947  | 0.0062 | 0.0516 | 0.5424 | 6  | 9  | 0 |
| PUF60      | 8  |  | 8q24.3         | 144898549 | 144911537 | 0.0062 | 0.0516 | 0.5424 | 14 | 1  | 0 |
| GFM1       | 3  |  | 3q25.32        | 158362317 | 158410361 | 0.0062 | 0.0516 | 0.5425 | 15 | 0  | 1 |
| TATDN2     | 3  |  | 3p25.3         | 10290372  | 10334334  | 0.0062 | 0.0516 | 0.5425 | 6  | 2  | 0 |
| ZC0orf54   | 20 |  | 20p13          | 749725    | 749228    | 0.0062 | 0.0516 | 0.5425 | 4  | 6  | 1 |
| POLQ       | 3  |  | 3q13.33        | 121150274 | 121265488 | 0.0062 | 0.0515 | 0.5426 | 5  | 4  | 1 |
| DIP2A      | 21 |  | 21q22.3        | 47878812  | 47989621  | 0.0061 | 0.0514 | 0.5427 | 5  | 7  | 0 |
| UGT3A1     | 5  |  | 5p13.2         | 35953210  | 35991499  | 0.0061 | 0.0513 | 0.5428 | 8  | 4  | 0 |
| ASNS       | 7  |  | 7q21.3         | 97481443  | 97501854  | 0.0061 | 0.0513 | 0.5429 | 3  | 2  | 0 |
| RAB6A      | 11 |  | 11q13.4        | 73386694  | 73472201  | 0.0061 | 0.0513 | 0.5429 | 3  | 2  | 0 |
| PACSN3     | 11 |  | 11p11.2        | 47199083  | 47207958  | 0.0061 | 0.0513 | 0.5430 | 3  | 2  | 0 |
| FNDCS1     | 1  |  | 1p35.1         | 33327869  | 33336347  | 0.0061 | 0.0513 | 0.5430 | 2  | 8  | 0 |
| CREB3      | 9  |  | 9p13.3         | 35732317  | 35737004  | 0.0061 | 0.0512 | 0.5431 | 5  | 9  | 0 |
| LMAN2L     | 2  |  | 2q11.2         | 97371669  | 97405813  | 0.0061 | 0.0512 | 0.5431 | 7  | 3  | 1 |
| CPSF4      | 7  |  | 7q22.1         | 99036563  | 99054994  | 0.0061 | 0.0510 | 0.5434 | 4  | 1  | 0 |
| OMA1       | 1  |  | 1p32.2-p32.1   | 58933599  | 59012474  | 0.0061 | 0.0510 | 0.5434 | 7  | 5  | 0 |
| ZNF277     | 7  |  | 7q31.1         | 111846643 | 111983980 | 0.0061 | 0.0510 | 0.5434 | 9  | 2  | 1 |
| TMEM48     | 1  |  | 1p32.3         | 54233392  | 54304175  | 0.0061 | 0.0510 | 0.5435 | 7  | 6  | 0 |
| SMCR7L     | 22 |  | 22q13.1        | 39896105  | 39914133  | 0.0061 | 0.0509 | 0.5435 | 2  | 6  | 0 |
| ZNF512B    | 20 |  | 20q13.33       | 62588055  | 62680113  | 0.0060 | 0.0509 | 0.5435 | 8  | 6  | 0 |
| PRSS16     | 6  |  | 6p22.1         | 27215508  | 27224348  | 0.0060 | 0.0509 | 0.5436 | 7  | 0  | 0 |
| DONSON     | 21 |  | 21q22.11       | 34931848  | 35288158  | 0.0060 | 0.0509 | 0.5436 | 5  | 6  | 0 |
| DDX23      | 12 |  | 12q13.12       | 49223540  | 49245957  | 0.0060 | 0.0509 | 0.5437 | 0  | 7  | 0 |
| H0XA6      | 7  |  | 7p15.2         | 27185116  | 27187368  | 0.0060 | 0.0509 | 0.5437 | 4  | 7  | 0 |
| SH3YL1     | 2  |  | 2p25.3         | 218149    | 264824    | 0.0060 | 0.0509 | 0.5437 | 9  | 3  | 0 |
| PIIB       | 15 |  | 15q22.31       | 64448017  | 64455354  | 0.0060 | 0.0508 | 0.5438 | 2  | 6  | 0 |
| NAF1       | 4  |  | 4q32.2         | 164047860 | 164088073 | 0.0060 | 0.0508 | 0.5438 | 2  | 5  | 1 |
| APOL1      | 22 |  | 22q12.3        | 36649117  | 36663576  | 0.0060 | 0.0508 | 0.5439 | 3  | 8  | 0 |
| ZFAND1     | 8  |  | 8q21.13        | 82613958  | 82633530  | 0.0060 | 0.0508 | 0.5439 | 12 | 1  | 2 |
| DNAJA4     | 15 |  | 15q25.1        | 78556487  | 78574534  | 0.0060 | 0.0508 | 0.5439 | 5  | 6  | 0 |
| CDC37L1    | 9  |  | 9p24.1         | 4679559   | 4707634   | 0.0060 | 0.0507 | 0.5441 | 6  | 9  | 0 |
| REM2       | 14 |  | 14q11.2        | 23352432  | 23356889  | 0.0060 | 0.0507 | 0.5441 | 3  | 4  | 0 |
| JAZF1      | 7  |  | 7p15.2-p15.1   | 27870192  | 28220437  | 0.0060 | 0.0506 | 0.5442 | 1  | 8  | 0 |
| CTNBNB1    | 20 |  | 20q11.23       | 36322434  | 36500531  | 0.0060 | 0.0506 | 0.5442 | 1  | 6  | 0 |
| IBTK       | 6  |  | 6q11.4         | 82879703  | 82957471  | 0.0060 | 0.0505 | 0.5443 | 7  | 2  | 0 |
| PHGDH      | 1  |  | 1p12           | 120254419 | 120286848 | 0.0060 | 0.0505 | 0.5444 | 10 | 4  | 0 |
| FUK        | 16 |  | 16q22.1        | 70488498  | 70514176  | 0.0059 | 0.0504 | 0.5445 | 6  | 7  | 0 |
| GNB5       | 15 |  | 15q21.2        | 52413123  | 52483565  | 0.0059 | 0.0504 | 0.5445 | 1  | 6  | 0 |
| TEX2       | 17 |  | 17q23.3        | 62224796  | 62340653  | 0.0059 | 0.0504 | 0.5446 | 6  | 2  | 0 |
| MAPKAP1    | 9  |  | 9q33.3         | 128199673 | 128469513 | 0.0059 | 0.0504 | 0.5446 | 1  | 7  | 0 |
| MTMR12     | 5  |  | 5p13.3         | 32227111  | 32313114  | 0.0059 | 0.0504 | 0.5446 | 8  | 4  | 0 |
| CCDC24     | 1  |  | 1p34.1         | 44457280  | 44462196  | 0.0059 | 0.0502 | 0.5448 | 3  | 3  | 0 |
| ZNF574     | 19 |  | 19q13.2        | 42572864  | 42585717  | 0.0059 | 0.0501 | 0.5449 | 4  | 7  | 0 |
| AC114273.2 | 19 |  | 19p13.12       | 16144564  | 16152945  | 0.0059 | 0.0501 | 0.5450 | 3  | 2  | 0 |
| CENPM      | 22 |  | 22q13.2        | 42334741  | 42343148  | 0.0059 | 0.0501 | 0.5450 | 2  | 6  | 0 |
| ZNF729     | 19 |  | 19p12          | 22486433  | 22499951  | 0.0059 | 0.0501 | 0.5451 | 6  | 4  | 0 |
| C17orf75   | 17 |  | 17q11.2        | 30658392  | 30669189  | 0.0059 | 0.0499 | 0.5453 | 0  | 7  | 0 |
| PIGL       | 17 |  | 17p11.2        | 16120509  | 16229561  | 0.0058 | 0.0498 | 0.5454 | 0  | 13 | 0 |
| CDS1       | 4  |  | 4q21.23        | 85504057  | 85572492  | 0.0058 | 0.0498 | 0.5455 | 3  | 4  | 0 |
| FOXP4      | 6  |  | 6p21.1         | 41514164  | 41570121  | 0.0058 | 0.0497 | 0.5456 | 13 | 2  | 0 |
| PAWR       | 12 |  | 12q21.2        | 79985747  | 80084790  | 0.0058 | 0.0497 | 0.5457 | 2  | 7  | 0 |
| ARID4B     | 1  |  | 1q42.3         | 235330210 | 235491532 | 0.0058 | 0.0495 | 0.5458 | 19 | 1  | 1 |
| C5         | 9  |  | 9q33.2         | 123714616 | 123837452 | 0.0058 | 0.0495 | 0.5459 | 3  | 7  | 0 |
| PDLIM1     | 10 |  | 10q23.33-q24.1 | 96997334  | 97050781  | 0.0058 | 0.0493 | 0.5461 | 1  | 11 | 0 |
| ANAPC13    | 3  |  | 3q22.2         | 134196547 | 134204863 | 0.0058 | 0.0493 | 0.5462 | 14 | 0  | 0 |
| PIK3C2A    | 11 |  | 11p15.1        | 17108129  | 17191354  | 0.0058 | 0.0492 | 0.5463 | 6  | 4  | 0 |
| NAP1L1     | 12 |  | 12q21.2        | 76438682  | 76478738  | 0.0057 | 0.0492 | 0.5463 | 0  | 6  | 0 |
| ADRA1D     | 20 |  | 20p13          | 4201278   | 4229659   | 0.0057 | 0.0491 | 0.5464 | 2  | 8  | 0 |
| FOLH1      | 11 |  | 11p11.12       | 49168188  | 49230222  | 0.0057 | 0.0491 | 0.5464 | 8  | 3  | 0 |
| STAR3NL    | 7  |  | 7p14.1         | 38217851  | 38270235  | 0.0057 | 0.0491 | 0.5465 | 3  | 9  | 0 |
| SDC2       | 8  |  | 8q22.1         | 97505882  | 97624037  | 0.0057 | 0.0491 | 0.5465 | 18 | 0  | 2 |
| HACE1      | 6  |  | 6q16.3         | 105175988 | 105308174 | 0.0057 | 0.0491 | 0.5465 | 8  | 3  | 0 |
| ATAD3B     | 1  |  | 1p36.33        | 1407143   | 1431581   | 0.0057 | 0.0491 | 0.5465 | 2  | 8  | 0 |
| SUB1       | 5  |  | 5p13.3         | 32585605  | 32604185  | 0.0057 | 0.0491 | 0.5466 | 9  | 4  | 0 |
| CCDC34     | 11 |  | 11p14.1        | 27360061  | 27384852  | 0.0057 | 0.0490 | 0.5466 | 5  | 2  | 0 |
| STK25      | 2  |  | 2q37.3         | 242434434 | 242449145 | 0.0057 | 0.0490 | 0.5467 | 4  | 7  | 0 |
| LSM1       | 8  |  | 8p11.23        | 38020861  | 38034026  | 0.0057 | 0.0489 | 0.5468 | 5  | 4  | 0 |
| DSCR3      | 21 |  | 21q22.13       | 38595728  | 38640262  | 0.0057 | 0.0488 | 0.5470 | 5  | 4  | 0 |
| PGLS       | 19 |  | 19p13.11       | 17622432  | 17632095  | 0.0057 | 0.0488 | 0.5470 | 3  | 4  | 0 |
| SSB        | 2  |  | 2q31.1         | 170648443 | 170688574 | 0.0057 | 0.0488 | 0.5470 | 6  | 4  | 0 |
| CANX       | 5  |  | 5q35.3         | 179125503 | 179158637 | 0.0057 | 0.0488 | 0.5471 | 5  | 4  | 0 |
| ZC3H13     | 13 |  | 13q14.13       | 46528600  | 46626894  | 0.0057 | 0.0488 | 0.5471 | 2  | 7  | 0 |
| VEZF1      | 17 |  | 17q22          | 56048910  | 56065615  | 0.0057 | 0.0488 | 0.5471 | 6  | 6  | 0 |
| ASCC3      | 6  |  | 6p16.3         | 100956070 | 101329240 | 0.0057 | 0.0488 | 0.5471 | 7  | 5  | 0 |
| RUVBL2     | 19 |  | 19q13.33       | 49497156  | 49519182  | 0.0056 | 0.0487 | 0.5473 | 3  | 7  | 0 |
| TRIP11     | 14 |  | 14q32.12       | 92435462  | 92506817  | 0.0056 | 0.0487 | 0.5473 | 2  | 9  | 0 |
| ARL2BP     | 16 |  | 16q13          | 57279038  | 57287545  | 0.0056 | 0.0486 | 0.5475 | 3  | 9  | 0 |
| KIAA1033   | 12 |  | 12q23.3        | 105501492 | 105562904 | 0.0056 | 0.0485 | 0.5475 | 1  | 9  | 0 |
| ZNF142     | 2  |  | 2q35           | 219502639 | 219524378 | 0.0056 | 0.0485 | 0.5476 | 2  | 7  | 0 |
| YWHAB      | 20 |  | 20q13.12       | 43514344  | 43537160  | 0.0056 | 0.0485 | 0.5476 | 4  | 8  | 0 |
| LARP7      | 4  |  | 4q25           | 113558120 | 113578741 | 0.0056 | 0.0485 | 0.5476 | 2  | 4  | 0 |
| C11orf59   | 11 |  | 11q13.4        | 71808339  | 71814322  | 0.0056 | 0.0485 | 0.5477 | 4  | 4  | 0 |
| C14orf10   | 14 |  | 14q13.2        | 35554704  | 35591637  | 0.0056 | 0.0484 | 0.5478 | 2  | 4  | 0 |
| LPP        | 3  |  | 3q27.3-q28     | 187871072 | 188597441 | 0.0056 | 0.0483 | 0.5479 | 10 | 2  | 0 |
| C18orf2    | 18 |  | 18p11.32       | 1269177   | 1359630   | 0.0056 | 0.0483 | 0.5479 | 8  | 4  | 0 |
| PRPF6      | 20 |  | 20q13.33       | 62612431  | 62664449  | 0.0056 | 0.0483 | 0.5480 | 8  | 6  | 0 |

Supplementary Table 6  
Page 18

|             |    |               |           |           |        |        |        |    |    |   |
|-------------|----|---------------|-----------|-----------|--------|--------|--------|----|----|---|
| RPL6P27     | 12 | 12q24.13      | 112842997 | 112847443 | 0.0050 | 0.0450 | 0.5537 | 2  | 7  | 0 |
| RALA        | 7  | 7p14.1        | 39663162  | 39747715  | 0.0050 | 0.0450 | 0.5537 | 3  | 9  | 0 |
| DUSP14      | 17 | 17q12         | 35849937  | 35873603  | 0.0050 | 0.0450 | 0.5537 | 3  | 9  | 0 |
| LMBRD1      | 6  | 6q13          | 70385698  | 70506888  | 0.0050 | 0.0449 | 0.5539 | 5  | 1  | 0 |
| NR2C2       | 3  | 3p25.1        | 14989091  | 15095107  | 0.0050 | 0.0449 | 0.5539 | 6  | 3  | 0 |
| RTCD1       | 1  | 1p21.2        | 100731714 | 100758323 | 0.0050 | 0.0449 | 0.5539 | 4  | 9  | 0 |
| DNMT3A      | 2  | 2p23.3        | 25455846  | 25565459  | 0.0050 | 0.0448 | 0.5540 | 6  | 1  | 0 |
| NACC1       | 19 | 19p13.2       | 13229109  | 13251955  | 0.0049 | 0.0446 | 0.5543 | 5  | 4  | 1 |
| MYST1       | 16 | 16p11.2       | 31128987  | 31142705  | 0.0049 | 0.0446 | 0.5543 | 3  | 1  | 0 |
| NARG2       | 15 | 15q22.2       | 60711808  | 60771344  | 0.0049 | 0.0446 | 0.5543 | 2  | 6  | 0 |
| BAX         | 19 | 19q13.33      | 49458117  | 49465052  | 0.0049 | 0.0446 | 0.5543 | 3  | 7  | 0 |
| ZDHC16      | 10 | 10q24.1       | 99205930  | 99217124  | 0.0049 | 0.0446 | 0.5544 | 1  | 9  | 0 |
| ANAPC10P    | 4  | 4q31.21       | 145916315 | 146019368 | 0.0049 | 0.0446 | 0.5544 | 4  | 6  | 0 |
| MTMR4       | 17 | 17q22         | 56566893  | 56595251  | 0.0049 | 0.0444 | 0.5547 | 6  | 4  | 0 |
| AAMP        | 2  | 2q35          | 219128852 | 219134901 | 0.0049 | 0.0442 | 0.5550 | 2  | 7  | 0 |
| RND3        | 2  | 2q23.3        | 151324709 | 151395525 | 0.0049 | 0.0442 | 0.5551 | 3  | 6  | 0 |
| LIMD1       | 3  | 3p21.31       | 45635816  | 45722755  | 0.0049 | 0.0442 | 0.5551 | 1  | 8  | 0 |
| NWD1        | 19 | 19p13.11      | 16830787  | 16928773  | 0.0049 | 0.0442 | 0.5551 | 3  | 2  | 0 |
| FAM119A     | 2  | 2q33.3        | 208445355 | 208490651 | 0.0049 | 0.0441 | 0.5552 | 2  | 3  | 0 |
| ZCCHC6      | 9  | 9q21.33       | 88902648  | 88969369  | 0.0049 | 0.0440 | 0.5553 | 4  | 6  | 0 |
| PRLR        | 5  | 5p13.2        | 35048864  | 35230794  | 0.0048 | 0.0440 | 0.5554 | 8  | 4  | 0 |
| MRPS15      | 1  | 1p34.3        | 36921362  | 36930040  | 0.0048 | 0.0439 | 0.5555 | 2  | 6  | 0 |
| CSNK2A2     | 16 | 16q21         | 58191819  | 58231782  | 0.0048 | 0.0439 | 0.5556 | 2  | 10 | 0 |
| ZNF407      | 18 | 18q22.3       | 72342919  | 72777628  | 0.0048 | 0.0439 | 0.5556 | 5  | 9  | 0 |
| ENPP4       | 6  | 6p21.1        | 46097701  | 46114435  | 0.0048 | 0.0439 | 0.5557 | 11 | 1  | 0 |
| RP33AP47    | 4  | 4q31.3        | 152020754 | 152025802 | 0.0048 | 0.0438 | 0.5558 | 1  | 8  | 0 |
| C17orf37    | 17 | 17q12         | 37885411  | 37886788  | 0.0048 | 0.0437 | 0.5559 | 3  | 9  | 0 |
| FAM120AOS   | 9  | 9q22.31       | 96208776  | 96215874  | 0.0048 | 0.0437 | 0.5559 | 3  | 8  | 0 |
| RAD21       | 8  | 8q24.11       | 117858174 | 117887105 | 0.0048 | 0.0437 | 0.5560 | 17 | 0  | 2 |
| HMGN4       | 6  | 6p22.2        | 26538572  | 26547160  | 0.0048 | 0.0436 | 0.5561 | 8  | 0  | 0 |
| RNF141      | 11 | 11p15.4       | 10533225  | 10562774  | 0.0048 | 0.0436 | 0.5561 | 4  | 6  | 0 |
| CIRH1A      | 16 | 16q22.1       | 69166499  | 69202936  | 0.0048 | 0.0435 | 0.5563 | 6  | 7  | 0 |
| MPZL2       | 11 | 11q23.3       | 118124137 | 118135009 | 0.0047 | 0.0434 | 0.5565 | 5  | 4  | 0 |
| GRK5        | 10 | 10q26.11      | 120967101 | 121215128 | 0.0047 | 0.0434 | 0.5565 | 3  | 7  | 0 |
| GGCT        | 7  | 7p14.3        | 30536237  | 30544452  | 0.0047 | 0.0433 | 0.5566 | 3  | 7  | 0 |
| PRLHR       | 10 | 10q26.11      | 120352916 | 120355160 | 0.0047 | 0.0433 | 0.5566 | 3  | 8  | 0 |
| MRPL55      | 1  | 1q42.13       | 228294380 | 228297013 | 0.0047 | 0.0433 | 0.5567 | 18 | 0  | 0 |
| SUGT1       | 13 | 13q14.3       | 53226831  | 53262433  | 0.0047 | 0.0432 | 0.5568 | 3  | 5  | 0 |
| CCDC18      | 1  | 1p22.1        | 93645920  | 93744287  | 0.0047 | 0.0431 | 0.5570 | 5  | 8  | 0 |
| CHCHD4      | 3  | 3p25.1        | 14153578  | 14166371  | 0.0047 | 0.0431 | 0.5570 | 7  | 3  | 0 |
| RPL22L1     | 3  | 3q26.2        | 170582667 | 170588045 | 0.0047 | 0.0430 | 0.5571 | 16 | 0  | 1 |
| SLAH1       | 16 | 16q12.1       | 48394442  | 48419229  | 0.0047 | 0.0430 | 0.5572 | 1  | 11 | 0 |
| C19orf53    | 19 | 19p13.2       | 13885257  | 13889582  | 0.0047 | 0.0430 | 0.5572 | 5  | 3  | 0 |
| TMEM5       | 12 | 12q14.2       | 64173664  | 64203300  | 0.0047 | 0.0430 | 0.5572 | 4  | 9  | 0 |
| AMDHD1      | 12 | 12q23.1       | 96337071  | 96362369  | 0.0047 | 0.0430 | 0.5573 | 1  | 5  | 0 |
| MED8        | 1  | 1p34.2        | 43849589  | 43855483  | 0.0047 | 0.0429 | 0.5573 | 3  | 3  | 0 |
| URM1        | 9  | 9q34.11       | 131133598 | 131153015 | 0.0047 | 0.0429 | 0.5573 | 3  | 7  | 0 |
| FTO         | 16 | 16q12.2       | 53737875  | 54148381  | 0.0047 | 0.0429 | 0.5574 | 2  | 13 | 0 |
| TKT         | 3  | 3p21.1        | 53258724  | 53290068  | 0.0047 | 0.0429 | 0.5575 | 0  | 11 | 0 |
| GSTCD       | 4  | 4q24          | 106629941 | 106768881 | 0.0046 | 0.0429 | 0.5575 | 2  | 4  | 0 |
| LSM14B      | 20 | 20q13.33      | 60697517  | 60710434  | 0.0046 | 0.0428 | 0.5576 | 7  | 7  | 0 |
| TNKS        | 8  | 8p23.1        | 9413445   | 9639856   | 0.0046 | 0.0428 | 0.5576 | 2  | 13 | 0 |
| RELT        | 11 | 11q13.4       | 73087405  | 73108518  | 0.0046 | 0.0428 | 0.5576 | 3  | 3  | 0 |
| BYSL        | 6  | 6p21.1        | 41888965  | 41900784  | 0.0046 | 0.0428 | 0.5577 | 11 | 1  | 0 |
| STRA13      | 17 | 17q25.3       | 79976580  | 79980773  | 0.0046 | 0.0427 | 0.5578 | 10 | 4  | 0 |
| MAPRE1      | 20 | 20q11.21      | 31407699  | 31438210  | 0.0046 | 0.0427 | 0.5578 | 3  | 3  | 0 |
| ZNF696      | 9  | 9q24.3        | 144373559 | 144438212 | 0.0046 | 0.0427 | 0.5578 | 14 | 1  | 0 |
| CR1L51      | 20 | 20p12.3       | 5989739   | 6020695   | 0.0046 | 0.0426 | 0.5581 | 3  | 8  | 0 |
| ZNF14       | 19 | 19p13.11      | 19821282  | 19843921  | 0.0046 | 0.0426 | 0.5581 | 6  | 3  | 0 |
| FGFBP3      | 10 | 10q23.32      | 93666345  | 93668258  | 0.0046 | 0.0425 | 0.5582 | 3  | 9  | 0 |
| SLC38A5     | 23 | 23p11.23      | 48316922  | 48328644  | 0.0046 | 0.0425 | 0.5582 | 2  | 13 | 0 |
| CISD2       | 4  | 4q24          | 103790135 | 103809913 | 0.0046 | 0.0425 | 0.5584 | 2  | 4  | 0 |
| PREP        | 6  | 6q21          | 105725506 | 105850969 | 0.0046 | 0.0425 | 0.5584 | 8  | 3  | 0 |
| DHRS7       | 14 | 14q23.1       | 60611502  | 60632211  | 0.0046 | 0.0424 | 0.5584 | 2  | 9  | 0 |
| LIG3        | 17 | 17q12         | 33307538  | 33332088  | 0.0046 | 0.0424 | 0.5585 | 2  | 11 | 0 |
| CCDC21      | 1  | 1p36.11       | 26560693  | 26605298  | 0.0046 | 0.0423 | 0.5586 | 0  | 11 | 0 |
| ECSIT       | 19 | 19p13.2       | 11616745  | 11639987  | 0.0045 | 0.0422 | 0.5588 | 2  | 4  | 0 |
| FAM120A     | 9  | 9q22.31       | 96214002  | 96328397  | 0.0045 | 0.0422 | 0.5588 | 3  | 8  | 0 |
| MAP3K2      | 2  | 2q14.3        | 128056306 | 128146041 | 0.0045 | 0.0422 | 0.5588 | 4  | 8  | 0 |
| TLR7        | 23 | 23p22.2       | 12885202  | 12908480  | 0.0045 | 0.0422 | 0.5589 | 5  | 10 | 0 |
| TPM4        | 19 | 19p13.12      | 16178317  | 16213813  | 0.0045 | 0.0421 | 0.5590 | 3  | 2  | 0 |
| OKI         | 6  | 6q26          | 163835675 | 163994896 | 0.0045 | 0.0421 | 0.5591 | 1  | 9  | 0 |
| TP53BP1     | 15 | 15q15.3       | 43699412  | 43802698  | 0.0045 | 0.0421 | 0.5591 | 0  | 10 | 0 |
| ARFGAP3     | 22 | 22q13.2       | 43192532  | 43411151  | 0.0045 | 0.0419 | 0.5593 | 2  | 6  | 0 |
| FBXW9       | 19 | 19p13.2       | 12799730  | 12807455  | 0.0045 | 0.0418 | 0.5595 | 4  | 4  | 0 |
| C20orf108   | 20 | 20q13.2       | 54933983  | 54943709  | 0.0045 | 0.0418 | 0.5595 | 4  | 7  | 0 |
| NECAP1      | 12 | 12p13.31      | 8234807   | 8250373   | 0.0045 | 0.0418 | 0.5596 | 8  | 4  | 0 |
| WTAP        | 6  | 6q25.3        | 160148152 | 160177349 | 0.0045 | 0.0418 | 0.5596 | 2  | 6  | 0 |
| AURKB       | 17 | 17p13.1       | 8108057   | 8113900   | 0.0044 | 0.0416 | 0.5600 | 0  | 13 | 0 |
| APH1A       | 1  | 1q21.2        | 150237799 | 150241532 | 0.0044 | 0.0414 | 0.5602 | 15 | 1  | 0 |
| HSO17B1     | 17 | 17q21.2       | 40701232  | 40707224  | 0.0044 | 0.0414 | 0.5602 | 1  | 11 | 0 |
| TRMT6       | 20 | 20p12.3       | 5918486   | 5931182   | 0.0044 | 0.0414 | 0.5602 | 3  | 7  | 0 |
| PROSC       | 8  | 8p11.23       | 37620101  | 37637285  | 0.0044 | 0.0414 | 0.5602 | 2  | 5  | 0 |
| SIT1        | 9  | 9p13.3        | 35649300  | 35650947  | 0.0044 | 0.0414 | 0.5603 | 5  | 9  | 0 |
| ARHGFE10    | 8  | 8q23.3        | 1772142   | 1908789   | 0.0044 | 0.0413 | 0.5604 | 2  | 12 | 0 |
| KIA0776     | 6  | 6p16.1        | 96969702  | 97003149  | 0.0044 | 0.0412 | 0.5607 | 8  | 5  | 0 |
| GALK2       | 15 | 15q21.1-q21.2 | 49447976  | 49622002  | 0.0044 | 0.0412 | 0.5607 | 1  | 7  | 0 |
| PCMT1       | 6  | 6q25.1        | 150070580 | 150132556 | 0.0044 | 0.0412 | 0.5608 | 3  | 7  | 0 |
| C6orf203    | 6  | 6q21          | 107349407 | 107372544 | 0.0044 | 0.0411 | 0.5608 | 7  | 3  | 0 |
| GSTA4       | 6  | 6p12.2        | 52842747  | 52860178  | 0.0044 | 0.0411 | 0.5608 | 11 | 1  | 0 |
| JDP2        | 14 | 14q24.3       | 75894509  | 75939402  | 0.0044 | 0.0411 | 0.5609 | 1  | 11 | 0 |
| AC048382.3  | 15 | 15q25.2       | 85070012  | 85114335  | 0.0043 | 0.0411 | 0.5609 | 5  | 6  | 0 |
| UBXD2       | 2  | 2q21.3        | 136499189 | 136542633 | 0.0043 | 0.0411 | 0.5610 | 4  | 9  | 0 |
| CEACAM7     | 19 | 19q13.2       | 42177233  | 42192199  | 0.0043 | 0.0411 | 0.5610 | 5  | 7  | 0 |
| TXNDC12     | 1  | 1p32.3        | 52485806  | 52521047  | 0.0043 | 0.0410 | 0.5611 | 6  | 6  | 0 |
| SMYD2       | 1  | 1q32.3-q41    | 214454536 | 214510479 | 0.0043 | 0.0410 | 0.5611 | 16 | 2  | 1 |
| JARID1B     | 1  | 1q32.1        | 202696533 | 202778563 | 0.0043 | 0.0410 | 0.5611 | 14 | 1  | 0 |
| STRBP       | 9  | 9q33.3        | 125886987 | 126030897 | 0.0043 | 0.0409 | 0.5613 | 1  | 8  | 0 |
| MLL         | 11 | 11q23.3       | 118307205 | 118395936 | 0.0043 | 0.0409 | 0.5613 | 6  | 3  | 0 |
| CDKN1B      | 12 | 12p13.1       | 12870302  | 12875305  | 0.0043 | 0.0407 | 0.5616 | 7  | 5  | 0 |
| PRPK1       | 6  | 6p25.2        | 3068741   | 3115421   | 0.0043 | 0.0407 | 0.5616 | 13 | 3  | 0 |
| PRDX6       | 1  | 1q25.1        | 173446486 | 173457946 | 0.0043 | 0.0406 | 0.5618 | 16 | 1  | 0 |
| PHIP        | 6  | 6q14.1        | 79644136  | 79788011  | 0.0043 | 0.0406 | 0.5618 | 7  | 1  | 0 |
| ANKRD27     | 19 | 19q13.11      | 33087907  | 33166102  | 0.0043 | 0.0406 | 0.5619 | 2  | 2  | 0 |
| C3orf55     | 3  | 3q25.32       | 157261159 | 157319022 | 0.0043 | 0.0406 | 0.5619 | 13 | 0  | 1 |
| UQC         | 20 | 20q11.22      | 33890369  | 33998834  | 0.0043 | 0.0406 | 0.5619 | 0  | 6  | 0 |
| RQCD1       | 2  | 2q35          | 219433303 | 219459619 | 0.0043 | 0.0406 | 0.5619 | 2  | 7  | 0 |
| NEK1        | 4  | 4q33          | 170314429 | 170533732 | 0.0043 | 0.0405 | 0.5620 | 2  | 6  | 1 |
| DFFB        | 1  | 1p36.32       | 3773845   | 3801993   | 0.0043 | 0.0405 | 0.5620 | 3  | 13 | 0 |
| AL441883.11 | 6  | 6p23          | 13615728  | 13621126  | 0.0043 | 0.0405 | 0.5620 | 13 | 2  | 0 |
| HSPBP1      | 19 | 19q13.42      | 55773592  | 55791751  | 0.0042 | 0.0405 | 0.5622 | 3  | 6  | 0 |
| MPZL1       | 1  | 1q24.2        | 167691208 | 167760058 | 0.0042 | 0.0404 | 0.5623 | 15 | 1  | 0 |
| JAGN1       | 3  | 3p25.3        | 9323271   | 9338033   | 0.0042 | 0.0404 | 0.5623 | 7  | 2  | 0 |
| PPP2R5E     | 14 | 14q23.2       | 63841355  | 64010079  | 0.0042 | 0.0403 | 0.5625 | 1  |    |   |

Supplementary Table 6  
Page 19

|              |    |  |              |           |           |        |        |        |    |    |   |
|--------------|----|--|--------------|-----------|-----------|--------|--------|--------|----|----|---|
| TSNAX        | 1  |  | 1q42.2       | 231664399 | 231702267 | 0.0038 | 0.0379 | 0.5674 | 21 | 0  | 1 |
| KIAA1012     | 18 |  | 18q12.1      | 29400137  | 29523091  | 0.0038 | 0.0378 | 0.5676 | 11 | 4  | 0 |
| C6orf167     | 6  |  | 6p16.1       | 97590037  | 97731052  | 0.0038 | 0.0377 | 0.5677 | 8  | 5  | 0 |
| SDCCAG1      | 14 |  | 14q21.3      | 50250532  | 50319539  | 0.0038 | 0.0377 | 0.5678 | 4  | 7  | 0 |
| ZNF43        | 19 |  | 19p12        | 21987754  | 22034830  | 0.0038 | 0.0376 | 0.5679 | 6  | 3  | 0 |
| OAT          | 10 |  | 10q26.13     | 126085872 | 126107519 | 0.0038 | 0.0375 | 0.5681 | 4  | 9  | 1 |
| SPINT2       | 19 |  | 19q13.2      | 38755202  | 38783108  | 0.0038 | 0.0375 | 0.5682 | 4  | 5  | 1 |
| C9orf21      | 9  |  | 9q22.33      | 99401859  | 99417599  | 0.0038 | 0.0374 | 0.5682 | 2  | 7  | 0 |
| USP7         | 16 |  | 16p13.2      | 8985951   | 9057341   | 0.0038 | 0.0374 | 0.5683 | 1  | 4  | 0 |
| NUDT2        | 9  |  | 9p13.3       | 34329504  | 34343709  | 0.0037 | 0.0372 | 0.5686 | 4  | 9  | 0 |
| NOL10        | 2  |  | 2p25.1       | 10710894  | 10830112  | 0.0037 | 0.0371 | 0.5687 | 6  | 4  | 0 |
| TMEM99       | 17 |  | 17q21.2      | 38975358  | 38992526  | 0.0037 | 0.0371 | 0.5687 | 3  | 10 | 0 |
| ARFIP2       | 11 |  | 11p15.4      | 6496928   | 6502595   | 0.0037 | 0.0371 | 0.5688 | 2  | 7  | 0 |
| TTC39C       | 18 |  | 18q11.2      | 21572737  | 21715573  | 0.0037 | 0.0370 | 0.5690 | 8  | 3  | 0 |
| SS18         | 18 |  | 18q11.2      | 23596219  | 23670611  | 0.0037 | 0.0370 | 0.5690 | 10 | 2  | 0 |
| ELMOD2       | 4  |  | 4q31.1       | 141445322 | 141474924 | 0.0037 | 0.0370 | 0.5690 | 5  | 6  | 0 |
| DEK          | 6  |  | 6p22.3       | 18224402  | 18264799  | 0.0037 | 0.0370 | 0.5691 | 10 | 0  | 0 |
| G3BP2        | 4  |  | 4q21.1       | 76567953  | 76598667  | 0.0037 | 0.0369 | 0.5692 | 3  | 3  | 0 |
| GPR18        | 13 |  | 13q32.3      | 99906968  | 99913998  | 0.0037 | 0.0369 | 0.5692 | 11 | 4  | 1 |
| MORN4        | 10 |  | 10q24.2      | 99374311  | 99393852  | 0.0037 | 0.0369 | 0.5692 | 1  | 9  | 1 |
| TMEM14A      | 6  |  | 6p12.2       | 52535884  | 52551386  | 0.0037 | 0.0369 | 0.5693 | 10 | 1  | 0 |
| ARPC2        | 2  |  | 2q35         | 219081864 | 219119070 | 0.0037 | 0.0369 | 0.5694 | 2  | 7  | 0 |
| PPP2CA       | 5  |  | 5q31.1       | 133532148 | 133561950 | 0.0037 | 0.0369 | 0.5694 | 0  | 13 | 0 |
| TRIAF1       | 12 |  | 12q24.31     | 120881765 | 120884215 | 0.0037 | 0.0368 | 0.5695 | 2  | 6  | 0 |
| DHRS2        | 14 |  | 14q11.2      | 24099378  | 24114846  | 0.0036 | 0.0366 | 0.5699 | 3  | 4  | 0 |
| TRMT2B       | 23 |  | 23q22.1      | 100264339 | 100307070 | 0.0036 | 0.0365 | 0.5699 | 1  | 13 | 0 |
| SEC24B       | 4  |  | 4q25         | 110354871 | 110461609 | 0.0036 | 0.0365 | 0.5700 | 3  | 3  | 0 |
| C18orf56     | 18 |  | 18p11.32     | 649621    | 658340    | 0.0036 | 0.0365 | 0.5700 | 9  | 4  | 0 |
| RBX1         | 22 |  | 22q13.2      | 41347385  | 41368668  | 0.0036 | 0.0365 | 0.5700 | 2  | 6  | 0 |
| ARHGAP19     | 10 |  | 10q24.1      | 98981933  | 99052413  | 0.0036 | 0.0365 | 0.5701 | 1  | 1  | 0 |
| C8orf59      | 8  |  | 8q21.2       | 86126288  | 86132643  | 0.0036 | 0.0364 | 0.5702 | 11 | 1  | 1 |
| CKK          | 4  |  | 4q13.3       | 71859265  | 71866627  | 0.0036 | 0.0363 | 0.5704 | 5  | 3  | 0 |
| RNF14        | 5  |  | 5q31.3       | 141346437 | 141368750 | 0.0036 | 0.0363 | 0.5705 | 0  | 14 | 0 |
| PRKD2        | 19 |  | 19q13.32     | 47177574  | 47220384  | 0.0036 | 0.0363 | 0.5705 | 3  | 9  | 0 |
| HTATIP2      | 11 |  | 11p15.1      | 20385231  | 20405329  | 0.0036 | 0.0363 | 0.5706 | 3  | 5  | 0 |
| BAT2D1       | 1  |  | 1q24.3       | 171454666 | 171562650 | 0.0036 | 0.0362 | 0.5707 | 16 | 1  | 1 |
| PTMA         | 2  |  | 2q37.1       | 232572340 | 232578245 | 0.0036 | 0.0361 | 0.5708 | 2  | 9  | 0 |
| YARS2        | 12 |  | 12p11.21     | 32899479  | 32908874  | 0.0036 | 0.0360 | 0.5710 | 4  | 5  | 0 |
| ZNF184       | 6  |  | 6p22.1       | 27418522  | 27440897  | 0.0036 | 0.0359 | 0.5712 | 8  | 0  | 0 |
| RIPX         | 4  |  | 4q13.3       | 71570654  | 71674335  | 0.0035 | 0.0357 | 0.5715 | 5  | 3  | 0 |
| GNPNAT1      | 14 |  | 14q22.1      | 53241912  | 53258386  | 0.0035 | 0.0357 | 0.5715 | 2  | 8  | 0 |
| EIF4E        | 4  |  | 4q23         | 99799607  | 99851786  | 0.0035 | 0.0357 | 0.5716 | 3  | 4  | 0 |
| NHLH2        | 1  |  | 1p13.1       | 116378998 | 116386538 | 0.0035 | 0.0357 | 0.5716 | 5  | 5  | 0 |
| SUMO2        | 17 |  | 17q25.1      | 73163825  | 73179098  | 0.0035 | 0.0357 | 0.5716 | 6  | 3  | 0 |
| TANC1        | 2  |  | 2q24.2       | 159825146 | 160089166 | 0.0035 | 0.0356 | 0.5717 | 6  | 4  | 0 |
| LACE1        | 6  |  | 6q21         | 108616098 | 108844320 | 0.0035 | 0.0355 | 0.5719 | 8  | 2  | 0 |
| IMP3         | 15 |  | 15q24.2      | 75931426  | 75941047  | 0.0035 | 0.0355 | 0.5720 | 4  | 5  | 0 |
| EIF2A        | 3  |  | 3q25.1       | 150264574 | 150303802 | 0.0035 | 0.0355 | 0.5720 | 13 | 1  | 0 |
| EEF1E1       | 6  |  | 6p24.3       | 8073593   | 8102828   | 0.0035 | 0.0355 | 0.5721 | 8  | 3  | 0 |
| GOSR1        | 17 |  | 17q11.2      | 28804426  | 28853831  | 0.0035 | 0.0354 | 0.5721 | 0  | 6  | 0 |
| USP37        | 2  |  | 2q35         | 219314974 | 219433084 | 0.0035 | 0.0354 | 0.5722 | 2  | 7  | 0 |
| HIBCH        | 2  |  | 2q32.2       | 191054461 | 191208919 | 0.0035 | 0.0354 | 0.5722 | 5  | 2  | 0 |
| C9orf72      | 9  |  | 9p21.2       | 27546544  | 27573842  | 0.0035 | 0.0353 | 0.5724 | 4  | 10 | 0 |
| PML          | 15 |  | 15q24.1      | 74287014  | 74340151  | 0.0035 | 0.0353 | 0.5724 | 7  | 6  | 1 |
| CCNC         | 6  |  | 6q16.2       | 99990264  | 100016690 | 0.0035 | 0.0353 | 0.5724 | 7  | 5  | 0 |
| DDX52        | 17 |  | 17q12        | 35972413  | 36003487  | 0.0035 | 0.0353 | 0.5724 | 3  | 10 | 0 |
| CLCN3        | 4  |  | 4q33         | 170541722 | 170642156 | 0.0035 | 0.0353 | 0.5724 | 2  | 6  | 1 |
| SOX4         | 6  |  | 6p22.3       | 21593972  | 21598847  | 0.0035 | 0.0353 | 0.5725 | 9  | 0  | 0 |
| RAB39B       | 4  |  | 4q31.1       | 140374961 | 140397061 | 0.0035 | 0.0353 | 0.5726 | 5  | 6  | 1 |
| A1BG         | 19 |  | 19q13.43     | 58858172  | 58964865  | 0.0035 | 0.0353 | 0.5726 | 3  | 5  | 0 |
| NCOA2        | 8  |  | 8q13.3       | 71015826  | 71316020  | 0.0034 | 0.0353 | 0.5727 | 13 | 2  | 0 |
| NMT1         | 17 |  | 17q21.31     | 43138680  | 43186377  | 0.0034 | 0.0351 | 0.5729 | 2  | 11 | 0 |
| C6orf115     | 6  |  | 6q24.1       | 139349819 | 139364439 | 0.0034 | 0.0350 | 0.5731 | 7  | 3  | 1 |
| ZC3H4        | 19 |  | 19q13.32     | 47567449  | 47617009  | 0.0034 | 0.0350 | 0.5732 | 3  | 9  | 0 |
| NSUN2        | 5  |  | 5p15.31      | 6599355   | 6633157   | 0.0034 | 0.0348 | 0.5734 | 8  | 5  | 1 |
| AC116353.2-1 | 5  |  | 5q31.3       | 140027384 | 140042064 | 0.0034 | 0.0348 | 0.5735 | 0  | 12 | 0 |
| NUP43        | 6  |  | 6q25.1       | 150045459 | 150067814 | 0.0034 | 0.0348 | 0.5735 | 3  | 8  | 0 |
| ZNF654       | 3  |  | 3p11.1       | 88188262  | 88193814  | 0.0034 | 0.0348 | 0.5735 | 6  | 2  | 0 |
| ZBTB5        | 9  |  | 9p13.2       | 37438102  | 37465407  | 0.0034 | 0.0347 | 0.5736 | 6  | 9  | 0 |
| RNF4         | 4  |  | 4p16.3       | 2470807   | 2517584   | 0.0034 | 0.0347 | 0.5737 | 1  | 8  | 0 |
| CCNA2        | 4  |  | 4q27         | 122737600 | 122745088 | 0.0034 | 0.0347 | 0.5738 | 4  | 2  | 0 |
| UBQLN4       | 1  |  | 1q22         | 156005093 | 156023516 | 0.0034 | 0.0346 | 0.5739 | 15 | 0  | 0 |
| RRP12        | 10 |  | 10q24.1      | 99116459  | 99161127  | 0.0034 | 0.0346 | 0.5739 | 1  | 9  | 0 |
| TBCA         | 5  |  | 5q14.1       | 76986995  | 77072185  | 0.0034 | 0.0345 | 0.5741 | 0  | 15 | 0 |
| GSPT1        | 16 |  | 16p13.13     | 11961987  | 12010519  | 0.0033 | 0.0343 | 0.5744 | 3  | 2  | 0 |
| PHKB         | 16 |  | 16q12.1      | 47495210  | 47735434  | 0.0033 | 0.0343 | 0.5744 | 2  | 10 | 0 |
| RAB21        | 12 |  | 12q21.1      | 72148658  | 72181150  | 0.0033 | 0.0343 | 0.5745 | 2  | 8  | 0 |
| CABLES1      | 18 |  | 18q11.2      | 20715727  | 20840434  | 0.0033 | 0.0343 | 0.5745 | 8  | 3  | 1 |
| POP1         | 8  |  | 8q22.2       | 99129540  | 99170642  | 0.0033 | 0.0343 | 0.5745 | 18 | 0  | 0 |
| KIAA1704     | 13 |  | 13q14.12     | 45563687  | 45607742  | 0.0033 | 0.0343 | 0.5745 | 2  | 7  | 0 |
| NDUFB6       | 9  |  | 9p21.1       | 32553523  | 32573182  | 0.0033 | 0.0343 | 0.5746 | 3  | 10 | 0 |
| COG5         | 7  |  | 7q22.3       | 106842991 | 107204485 | 0.0033 | 0.0343 | 0.5746 | 9  | 2  | 0 |
| SON          | 21 |  | 21q22.11     | 34915350  | 34949812  | 0.0033 | 0.0343 | 0.5747 | 5  | 6  | 0 |
| CXCR4        | 2  |  | 2q22.1       | 136871919 | 136875735 | 0.0033 | 0.0341 | 0.5749 | 4  | 8  | 0 |
| CHST10       | 2  |  | 2q11.2       | 101008330 | 101034118 | 0.0033 | 0.0341 | 0.5750 | 4  | 5  | 1 |
| SFRS1        | 17 |  | 17q22        | 56078284  | 56084707  | 0.0033 | 0.0341 | 0.5750 | 6  | 5  | 0 |
| PIAS3        | 1  |  | 1q21.1       | 145575233 | 145586546 | 0.0033 | 0.0340 | 0.5752 | 16 | 0  | 0 |
| ZYG11B       | 1  |  | 1p32.3       | 53192131  | 53293014  | 0.0033 | 0.0340 | 0.5752 | 7  | 6  | 0 |
| RPUSD2       | 15 |  | 15q15.1      | 40861498  | 40866658  | 0.0033 | 0.0340 | 0.5753 | 0  | 10 | 0 |
| RAP1GDS1     | 4  |  | 4q23         | 99182527  | 99365008  | 0.0033 | 0.0340 | 0.5753 | 3  | 4  | 0 |
| DDX19B       | 16 |  | 16q22.1      | 70328749  | 70367729  | 0.0033 | 0.0339 | 0.5755 | 6  | 7  | 0 |
| RAB2B        | 14 |  | 14q11.2      | 21927179  | 21945132  | 0.0033 | 0.0338 | 0.5756 | 2  | 4  | 0 |
| C3orf33      | 3  |  | 3q25.31      | 155480407 | 155524061 | 0.0032 | 0.0336 | 0.5760 | 13 | 0  | 0 |
| TMEM55B      | 14 |  | 14q11.2      | 20926012  | 20929637  | 0.0032 | 0.0336 | 0.5761 | 2  | 4  | 0 |
| AP1G1        | 16 |  | 16q22.2      | 71762903  | 71842979  | 0.0032 | 0.0336 | 0.5761 | 4  | 7  | 0 |
| JAK3         | 19 |  | 19p13.11     | 17927324  | 17958870  | 0.0032 | 0.0336 | 0.5761 | 3  | 3  | 0 |
| SERP1        | 3  |  | 3q25.1       | 150259781 | 150264428 | 0.0032 | 0.0336 | 0.5761 | 13 | 1  | 0 |
| PPP2R3B      | 23 |  | 23p22.33     | 294970    | 347893    | 0.0032 | 0.0335 | 0.5763 | 3  | 12 | 0 |
| CRYZL1       | 21 |  | 21q22.11     | 34961650  | 35016232  | 0.0032 | 0.0333 | 0.5766 | 5  | 6  | 0 |
| VIL2         | 6  |  | 6q25.3       | 159186774 | 159240456 | 0.0032 | 0.0333 | 0.5766 | 3  | 6  | 0 |
| PRKCI        | 3  |  | 3q26.2       | 169940220 | 170023770 | 0.0032 | 0.0333 | 0.5767 | 15 | 0  | 1 |
| GALNT14      | 2  |  | 2p23.1       | 31133334  | 31361571  | 0.0032 | 0.0332 | 0.5769 | 7  | 4  | 0 |
| RAB1F        | 1  |  | 1q32.1       | 202848088 | 202858263 | 0.0032 | 0.0332 | 0.5769 | 14 | 1  | 0 |
| SKIV2L2      | 5  |  | 5q11.2       | 54603576  | 54721406  | 0.0032 | 0.0331 | 0.5770 | 0  | 13 | 0 |
| BTBD10       | 11 |  | 11p15.2      | 13409558  | 13484838  | 0.0031 | 0.0330 | 0.5772 | 5  | 6  | 0 |
| FAM54B       | 1  |  | 1p36.11      | 26145131  | 26159432  | 0.0031 | 0.0330 | 0.5772 | 1  | 12 | 0 |
| MRPL22       | 5  |  | 5q32.3       | 154320633 | 154348970 | 0.0031 | 0.0330 | 0.5772 | 0  | 14 | 0 |
| DPY19L1      | 7  |  | 7p14.3-p14.2 | 34961081  | 35077653  | 0.0031 | 0.0330 | 0.5773 | 2  | 9  | 0 |
| C7orf44      | 7  |  | 7p13         | 43648083  | 43769316  | 0.0031 | 0.0330 | 0.5773 | 3  | 5  | 0 |
| CHIC2        | 4  |  | 4q12         | 54875963  | 54930788  | 0.0031 | 0.0330 | 0.5774 | 4  | 7  | 0 |

Supplementary Table 6  
Page 20

|              |    |  |                 |           |           |        |        |        |    |    |   |
|--------------|----|--|-----------------|-----------|-----------|--------|--------|--------|----|----|---|
| TRIM33       | 1  |  | 1p13.2          | 114935399 | 115053781 | 0.0028 | 0.0305 | 0.5833 | 5  | 5  | 0 |
| TOMM22       | 22 |  | 22q13.1         | 39077954  | 39080763  | 0.0028 | 0.0305 | 0.5833 | 2  | 6  | 0 |
| ZNF398       | 7  |  | 7q36.1          | 14877977  | 148880116 | 0.0028 | 0.0305 | 0.5834 | 10 | 1  | 0 |
| TLK2         | 17 |  | 17q23.2         | 60556386  | 60692839  | 0.0028 | 0.0305 | 0.5834 | 5  | 3  | 0 |
| FBXL5        | 4  |  | 4p15.32         | 15606154  | 15657013  | 0.0027 | 0.0303 | 0.5837 | 0  | 17 | 0 |
| HOMER1       | 5  |  | 5q14.1          | 78669787  | 78809700  | 0.0027 | 0.0303 | 0.5838 | 0  | 13 | 0 |
| PPIL4        | 6  |  | 6q25.1          | 149825631 | 149867171 | 0.0027 | 0.0303 | 0.5838 | 3  | 8  | 0 |
| PHF20        | 20 |  | 20q11.22-q11.23 | 34359923  | 34538288  | 0.0027 | 0.0303 | 0.5838 | 0  | 6  | 0 |
| WTIP         | 19 |  | 19q13.11        | 34971874  | 34992085  | 0.0027 | 0.0303 | 0.5839 | 5  | 2  | 0 |
| CNPY2        | 12 |  | 12q13.3         | 56704217  | 56710120  | 0.0027 | 0.0303 | 0.5839 | 1  | 7  | 0 |
| APBP1        | 16 |  | 16q22.1         | 66836783  | 66864879  | 0.0027 | 0.0303 | 0.5840 | 8  | 7  | 0 |
| CCT7         | 2  |  | 2p13.2          | 73461405  | 73480147  | 0.0027 | 0.0301 | 0.5843 | 4  | 1  | 0 |
| MRPL10       | 17 |  | 17q21.32        | 45900639  | 45908903  | 0.0027 | 0.0300 | 0.5845 | 1  | 7  | 0 |
| UGCGL2       | 13 |  | 13q32.1         | 96453838  | 96705637  | 0.0027 | 0.0299 | 0.5847 | 9  | 4  | 1 |
| EBPL         | 13 |  | 13q14.2         | 50234859  | 50265618  | 0.0027 | 0.0299 | 0.5848 | 2  | 6  | 0 |
| C1orf79      | 17 |  | 17q11.2         | 30178885  | 30186326  | 0.0027 | 0.0297 | 0.5850 | 0  | 7  | 0 |
| RBMS1        | 2  |  | 2q24.2          | 161130515 | 161350305 | 0.0027 | 0.0297 | 0.5850 | 5  | 4  | 0 |
| MRPL36       | 5  |  | 5p15.33         | 1798503   | 1799956   | 0.0027 | 0.0297 | 0.5851 | 11 | 4  | 2 |
| SYDE1        | 19 |  | 19p13.12        | 15218214  | 15225789  | 0.0027 | 0.0297 | 0.5851 | 4  | 2  | 2 |
| NSF          | 17 |  | 17q21.31        | 44668038  | 44834833  | 0.0027 | 0.0297 | 0.5851 | 2  | 8  | 0 |
| MKL2         | 16 |  | 16p13.12        | 14173145  | 14360629  | 0.0027 | 0.0297 | 0.5852 | 5  | 2  | 0 |
| ACP1         | 2  |  | 2p25.3          | 264869    | 278278    | 0.0027 | 0.0297 | 0.5852 | 9  | 3  | 0 |
| C11orf74     | 11 |  | 11p12           | 36616070  | 36680821  | 0.0026 | 0.0295 | 0.5856 | 5  | 2  | 0 |
| DCP1A        | 3  |  | 3p21.1          | 53317450  | 53381637  | 0.0026 | 0.0295 | 0.5856 | 0  | 12 | 0 |
| C19orf56     | 19 |  | 19p13.2         | 12778881  | 12780465  | 0.0026 | 0.0295 | 0.5857 | 4  | 4  | 0 |
| UCK1         | 9  |  | 9q34.13         | 134399184 | 134406662 | 0.0026 | 0.0295 | 0.5857 | 3  | 9  | 0 |
| NET1         | 10 |  | 10p15.1         | 5454518   | 5500401   | 0.0026 | 0.0295 | 0.5857 | 15 | 0  | 1 |
| HDSF         | 1  |  | 1q23.1          | 156711902 | 156722240 | 0.0026 | 0.0295 | 0.5858 | 16 | 0  | 1 |
| UBE3C        | 7  |  | 7q36.3          | 156931655 | 157082062 | 0.0026 | 0.0295 | 0.5858 | 14 | 2  | 0 |
| FCRL3        | 1  |  | 1q23.1          | 157644111 | 157670775 | 0.0026 | 0.0294 | 0.5859 | 19 | 0  | 1 |
| CNNM3        | 2  |  | 2q11.2          | 97481985  | 97501121  | 0.0026 | 0.0294 | 0.5859 | 7  | 3  | 1 |
| SYT1         | 12 |  | 12q21.2         | 79257773  | 79845787  | 0.0026 | 0.0294 | 0.5860 | 1  | 7  | 0 |
| UOCRB        | 8  |  | 8q22.1          | 97239310  | 97247862  | 0.0026 | 0.0293 | 0.5861 | 18 | 0  | 2 |
| GMD5         | 6  |  | 6p25.3          | 1624041   | 2245846   | 0.0026 | 0.0293 | 0.5861 | 11 | 4  | 0 |
| PDCD2L       | 19 |  | 19q13.11        | 34895303  | 34917070  | 0.0026 | 0.0293 | 0.5863 | 5  | 2  | 0 |
| FAM20B       | 1  |  | 1q25.2          | 178994939 | 179045697 | 0.0026 | 0.0291 | 0.5866 | 17 | 0  | 0 |
| XRN2         | 20 |  | 20p11.23-p11.22 | 21283922  | 21370463  | 0.0026 | 0.0291 | 0.5866 | 4  | 6  | 0 |
| C4orf33      | 4  |  | 4q28.2          | 130014829 | 130033842 | 0.0026 | 0.0291 | 0.5866 | 4  | 2  | 0 |
| IQCB1        | 3  |  | 3q13.33         | 121488610 | 121553926 | 0.0026 | 0.0291 | 0.5867 | 5  | 3  | 0 |
| FXR1         | 3  |  | 3q26.33         | 180630452 | 180694948 | 0.0026 | 0.0291 | 0.5868 | 14 | 1  | 0 |
| GEMIN8       | 23 |  | 23p22.2         | 14024845  | 14048035  | 0.0026 | 0.0291 | 0.5868 | 5  | 10 | 0 |
| RAB43        | 3  |  | 3q21.3          | 128806412 | 128880029 | 0.0026 | 0.0291 | 0.5868 | 7  | 2  | 0 |
| DHPS         | 19 |  | 19p13.2         | 12786537  | 12792682  | 0.0026 | 0.0291 | 0.5869 | 4  | 4  | 0 |
| BTN2A1       | 6  |  | 6p22.2          | 26458189  | 26469865  | 0.0026 | 0.0290 | 0.5869 | 8  | 0  | 0 |
| SDCBP        | 8  |  | 8q12.1          | 59465728  | 59495418  | 0.0026 | 0.0290 | 0.5870 | 14 | 2  | 1 |
| PWP2H        | 21 |  | 21q22.3         | 45527208  | 45565605  | 0.0026 | 0.0290 | 0.5871 | 4  | 6  | 0 |
| NADK         | 1  |  | 1p36.33         | 1682671   | 1711508   | 0.0026 | 0.0289 | 0.5873 | 4  | 8  | 0 |
| SS18L2       | 3  |  | 3p22.1          | 42623332  | 42636606  | 0.0026 | 0.0289 | 0.5873 | 3  | 7  | 0 |
| PDIA4        | 7  |  | 7q36.1          | 148700138 | 148725782 | 0.0025 | 0.0289 | 0.5873 | 10 | 1  | 0 |
| URB1         | 21 |  | 21q22.11        | 33683330  | 33765312  | 0.0025 | 0.0289 | 0.5873 | 4  | 6  | 0 |
| C10orf97     | 10 |  | 10p13           | 15820169  | 15902519  | 0.0025 | 0.0289 | 0.5873 | 10 | 1  | 1 |
| FAM60A       | 12 |  | 12p11.21        | 31433529  | 31479159  | 0.0025 | 0.0288 | 0.5875 | 5  | 4  | 0 |
| C1orf25      | 1  |  | 1q25.3          | 185087220 | 185126116 | 0.0025 | 0.0288 | 0.5875 | 17 | 0  | 1 |
| DBHD2        | 8  |  | 8p11.23         | 38089107  | 38120279  | 0.0025 | 0.0288 | 0.5876 | 5  | 4  | 0 |
| VPS13D       | 1  |  | 1p36.22         | 12290113  | 12572099  | 0.0025 | 0.0288 | 0.5876 | 0  | 11 | 0 |
| TTK          | 6  |  | 6q14.1          | 80714357  | 80752239  | 0.0025 | 0.0288 | 0.5877 | 7  | 1  | 0 |
| ZNF600       | 19 |  | 19q13.41        | 53267471  | 53320016  | 0.0025 | 0.0288 | 0.5877 | 4  | 5  | 0 |
| USP21        | 1  |  | 1q23.3          | 161128254 | 161135513 | 0.0025 | 0.0287 | 0.5879 | 19 | 0  | 2 |
| CXorf23      | 23 |  | 23p22.12        | 19931267  | 19988382  | 0.0025 | 0.0286 | 0.5880 | 5  | 12 | 0 |
| PHKG1        | 7  |  | 7p11.2          | 56147977  | 56160645  | 0.0025 | 0.0286 | 0.5880 | 3  | 2  | 0 |
| FERMT3       | 11 |  | 11q13.1         | 63974152  | 63991363  | 0.0025 | 0.0286 | 0.5880 | 5  | 3  | 0 |
| PTPN1        | 20 |  | 20q13.13        | 49126891  | 49201088  | 0.0025 | 0.0285 | 0.5883 | 7  | 4  | 0 |
| SNX13        | 7  |  | 7q21.1          | 17830385  | 17980131  | 0.0025 | 0.0285 | 0.5884 | 5  | 5  | 0 |
| SUPT4H1      | 17 |  | 17q22           | 56422539  | 56429563  | 0.0025 | 0.0285 | 0.5884 | 7  | 4  | 0 |
| ENDOD1       | 11 |  | 11q21           | 94823017  | 94865815  | 0.0025 | 0.0285 | 0.5884 | 6  | 3  | 0 |
| TRAPPC3      | 1  |  | 1p34.3          | 36602175  | 36615098  | 0.0025 | 0.0285 | 0.5885 | 0  | 5  | 0 |
| SMC4         | 3  |  | 3q25.33         | 160117430 | 160152739 | 0.0025 | 0.0285 | 0.5885 | 16 | 0  | 1 |
| TDP1         | 14 |  | 14q32.11        | 90422246  | 90511106  | 0.0025 | 0.0285 | 0.5886 | 3  | 10 | 0 |
| EED          | 11 |  | 11q14.2         | 85955815  | 85989778  | 0.0025 | 0.0285 | 0.5886 | 6  | 3  | 0 |
| KIAA1429     | 8  |  | 8q22.1          | 95500600  | 95565688  | 0.0025 | 0.0284 | 0.5887 | 14 | 0  | 2 |
| RRM2B        | 8  |  | 8q22.3          | 103216732 | 103251346 | 0.0025 | 0.0284 | 0.5887 | 19 | 0  | 2 |
| AHCY         | 20 |  | 20q11.22        | 32822646  | 32891150  | 0.0025 | 0.0284 | 0.5888 | 0  | 4  | 0 |
| ZNF292       | 6  |  | 6q14.3          | 87862552  | 87973406  | 0.0025 | 0.0284 | 0.5889 | 7  | 2  | 0 |
| PCNP         | 3  |  | 3q12.3          | 101293042 | 101313279 | 0.0025 | 0.0284 | 0.5889 | 4  | 2  | 0 |
| POLB         | 8  |  | 8p11.21         | 42196009  | 42229325  | 0.0025 | 0.0283 | 0.5892 | 5  | 4  | 0 |
| BCS1L        | 2  |  | 2q35            | 219523487 | 219528166 | 0.0024 | 0.0283 | 0.5892 | 2  | 6  | 0 |
| COPE         | 19 |  | 19p13.11        | 19010323  | 19030199  | 0.0024 | 0.0282 | 0.5894 | 4  | 3  | 0 |
| RP11-613F7.1 | 6  |  | 6q25.1          | 151546685 | 151547082 | 0.0024 | 0.0281 | 0.5895 | 3  | 7  | 0 |
| COMMD3       | 10 |  | 10p12.2         | 22605299  | 22609237  | 0.0024 | 0.0279 | 0.5900 | 12 | 1  | 0 |
| PRELID1      | 5  |  | 5q35.3          | 176730835 | 176733949 | 0.0024 | 0.0279 | 0.5900 | 4  | 6  | 0 |
| RBM9         | 22 |  | 22q12.3         | 36134784  | 36424585  | 0.0024 | 0.0278 | 0.5902 | 2  | 8  | 0 |
| TMEM192      | 4  |  | 4q32.3          | 165997231 | 166034024 | 0.0024 | 0.0278 | 0.5902 | 2  | 5  | 1 |
| ASXL2        | 2  |  | 2p23.3          | 25960561  | 26101335  | 0.0024 | 0.0278 | 0.5902 | 7  | 1  | 0 |
| TMEM112B     | 22 |  | 22q13.33        | 50941378  | 50946113  | 0.0024 | 0.0278 | 0.5903 | 6  | 5  | 0 |
| CHMP7        | 8  |  | 8p21.3          | 23101150  | 23119512  | 0.0024 | 0.0278 | 0.5904 | 0  | 13 | 0 |
| CCRK         | 9  |  | 9q22.1          | 90581363  | 90589657  | 0.0024 | 0.0277 | 0.5905 | 3  | 6  | 0 |
| SLC35E3      | 12 |  | 12p15           | 69139936  | 69159853  | 0.0024 | 0.0277 | 0.5906 | 3  | 8  | 0 |
| RNASEH2A     | 19 |  | 19p13.2         | 12917428  | 12924462  | 0.0024 | 0.0277 | 0.5906 | 4  | 4  | 0 |
| LMBRD2       | 5  |  | 5p13.2          | 36103414  | 36152015  | 0.0024 | 0.0276 | 0.5908 | 8  | 4  | 0 |
| MBIP         | 14 |  | 14q13.3         | 36767764  | 36789882  | 0.0024 | 0.0275 | 0.5910 | 2  | 5  | 0 |
| RHOT1        | 17 |  | 17q11.2         | 30469473  | 30552746  | 0.0024 | 0.0275 | 0.5910 | 0  | 7  | 0 |
| SRPK1        | 6  |  | 6p21.31         | 35800811  | 35888964  | 0.0024 | 0.0275 | 0.5911 | 10 | 0  | 0 |
| SNAP47       | 1  |  | 1q42.13         | 227916358 | 227968932 | 0.0023 | 0.0274 | 0.5912 | 18 | 0  | 0 |
| FAT1         | 4  |  | 4q35.2          | 187508938 | 187644987 | 0.0023 | 0.0273 | 0.5914 | 4  | 9  | 0 |
| NTAN1        | 16 |  | 16p13.11        | 15131711  | 15149843  | 0.0023 | 0.0272 | 0.5916 | 4  | 2  | 0 |
| SEC63        | 6  |  | 6q21            | 108188960 | 108279482 | 0.0023 | 0.0272 | 0.5916 | 8  | 2  | 0 |
| SPEF1        | 20 |  | 20p13           | 3758152   | 3762102   | 0.0023 | 0.0271 | 0.5919 | 2  | 8  | 0 |
| AC015871.7   | 15 |  | 15q25.1         | 80282247  | 80282948  | 0.0023 | 0.0271 | 0.5919 | 5  | 6  | 0 |
| NOB1         | 16 |  | 16q22.1         | 69775775  | 69788829  | 0.0023 | 0.0271 | 0.5919 | 6  | 7  | 0 |
| DYNLL2       | 17 |  | 17q22           | 56160799  | 56166811  | 0.0023 | 0.0269 | 0.5923 | 7  | 4  | 0 |
| HYOU1        | 11 |  | 11q23.3         | 118914896 | 118927925 | 0.0023 | 0.0269 | 0.5923 | 4  | 4  | 0 |
| LRRC45       | 17 |  | 17q25.3         | 79981280  | 79989024  | 0.0023 | 0.0269 | 0.5923 | 10 | 4  | 0 |
| NMU          | 4  |  | 4q12            | 56461414  | 56502465  | 0.0023 | 0.0269 | 0.5924 | 4  | 6  | 0 |
| MRPS10       | 6  |  | 6p21.1          | 42174540  | 42185633  | 0.0023 | 0.0269 | 0.5925 | 11 | 1  | 0 |
| C9orf127     | 9  |  | 9p13.3          | 35814448  | 35854843  | 0.0023 | 0.0268 | 0.5926 | 5  | 9  | 0 |
| FAM134B      | 5  |  | 5p15.1          | 16473148  | 16617118  | 0.0023 | 0.0268 | 0.5927 | 7  | 5  | 0 |
| SFMBT2       | 10 |  | 10p14           | 7200586   | 7453450   | 0.0023 | 0.0268 | 0.5927 | 16 | 1  | 1 |
| ZNF227       | 19 |  | 19q13.31        | 44716691  | 44741420  | 0.0023 | 0.0268 | 0.5927 | 3  | 7  | 0 |
| C18orf4      | 18 |  | 18q22.1         | 65173819  | 65184217  | 0.0023 | 0.0267 | 0.5929 | 7  | 6  | 0 |
| C1orf9       | 1  |  | 1q24.3          | 172501613 | 172580971 | 0.0023 | 0.0267 | 0.59   |    |    |   |

Supplementary Table 6  
Page 21

|             |    |                |            |            |        |        |        |    |    |   |
|-------------|----|----------------|------------|------------|--------|--------|--------|----|----|---|
| SURF4       | 9  | 9q34.2         | 1362228341 | 136242970  | 0.0020 | 0.0249 | 0.5983 | 4  | 9  | 1 |
| COO5        | 12 | 12q24.31       | 120941083  | 120966964  | 0.0020 | 0.0249 | 0.5983 | 2  | 6  | 0 |
| DENND4C     | 9  | 9q22.1         | 19276173   | 19374139   | 0.0020 | 0.0249 | 0.5983 | 4  | 9  | 0 |
| TA6L        | 11 | 11q12.3        | 62538865   | 62554811   | 0.0020 | 0.0249 | 0.5983 | 1  | 2  | 0 |
| DHX36       | 3  | 3q25.2         | 153993458  | 154042286  | 0.0020 | 0.0248 | 0.5985 | 13 | 0  | 0 |
| DCTN3       | 9  | 9p13.3         | 34613548   | 34620496   | 0.0020 | 0.0247 | 0.5987 | 5  | 9  | 0 |
| C10orf119   | 10 | 10q26.11       | 121588972  | 121632394  | 0.0020 | 0.0247 | 0.5988 | 2  | 7  | 0 |
| N6AMT2      | 13 | 13q12.11       | 21302870   | 21348088   | 0.0020 | 0.0246 | 0.5990 | 0  | 2  | 0 |
| HIATL1      | 9  | 9q22.32        | 97136833   | 97223201   | 0.0020 | 0.0246 | 0.5990 | 2  | 7  | 0 |
| HABP4       | 9  | 9q22.32        | 99212414   | 99253617   | 0.0020 | 0.0246 | 0.5991 | 2  | 7  | 0 |
| KPNA4       | 3  | 3q25.33        | 160217964  | 160283376  | 0.0020 | 0.0246 | 0.5991 | 16 | 0  | 1 |
| FTSJ2       | 7  | 7p22.3         | 2273928    | 2281848    | 0.0020 | 0.0246 | 0.5992 | 4  | 7  | 0 |
| CLINT1      | 5  | 5q33.3         | 157213297  | 157286168  | 0.0020 | 0.0245 | 0.5993 | 0  | 14 | 0 |
| WSB2        | 12 | 12q24.23       | 118470499  | 118499967  | 0.0020 | 0.0244 | 0.5995 | 2  | 7  | 0 |
| SUFU        | 10 | 10q24.32       | 104263764  | 104393209  | 0.0020 | 0.0244 | 0.5995 | 0  | 7  | 0 |
| COQ6        | 14 | 14q24.3        | 74416643   | 74429811   | 0.0020 | 0.0244 | 0.5995 | 1  | 10 | 0 |
| STK3        | 8  | 8q22.2         | 99466861   | 99895984   | 0.0020 | 0.0244 | 0.5997 | 19 | 0  | 1 |
| RPL8        | 8  | 8q24.3         | 146015155  | 146017805  | 0.0020 | 0.0244 | 0.5997 | 17 | 1  | 0 |
| EIF4G2      | 11 | 11p15.3        | 10818593   | 10830582   | 0.0020 | 0.0244 | 0.5997 | 4  | 6  | 0 |
| NDUFB3      | 2  | 2q33.1         | 201936156  | 201950473  | 0.0020 | 0.0244 | 0.5997 | 2  | 6  | 0 |
| ZNFR827     | 4  | 4q31.21-q31.22 | 146681892  | 146859787  | 0.0020 | 0.0244 | 0.5997 | 4  | 6  | 0 |
| MTERFD2     | 2  | 2q37.3         | 242026507  | 242041747  | 0.0020 | 0.0244 | 0.5997 | 5  | 7  | 0 |
| GABARAPL2   | 16 | 16q23.1        | 75600249   | 75611778   | 0.0019 | 0.0243 | 0.6001 | 2  | 8  | 0 |
| CHMP2B      | 3  | 3p11.2         | 87276413   | 87304695   | 0.0019 | 0.0242 | 0.6003 | 5  | 2  | 0 |
| NOL8        | 9  | 9q22.31        | 95059640   | 95087876   | 0.0019 | 0.0242 | 0.6004 | 3  | 8  | 0 |
| ARID1A      | 1  | 1p36.11        | 27022522   | 27108601   | 0.0019 | 0.0242 | 0.6004 | 0  | 11 | 0 |
| ABHD4       | 14 | 14q11.2        | 23067146   | 23081257   | 0.0019 | 0.0242 | 0.6004 | 3  | 4  | 0 |
| KEAF1       | 19 | 19p13.2        | 10596796   | 10614054   | 0.0019 | 0.0241 | 0.6005 | 3  | 4  | 0 |
| MEG22       | 9  | 9q34.2         | 136207756  | 136214972  | 0.0019 | 0.0241 | 0.6005 | 4  | 9  | 1 |
| STOM        | 9  | 9q33.2         | 124101357  | 124132545  | 0.0019 | 0.0241 | 0.6006 | 3  | 7  | 0 |
| DMKN        | 19 | 19q13.12       | 35988122   | 36004560   | 0.0019 | 0.0239 | 0.6010 | 5  | 1  | 0 |
| MAP7        | 6  | 6q23.3         | 136663873  | 136871792  | 0.0019 | 0.0239 | 0.6011 | 8  | 3  | 1 |
| SUMO1       | 2  | 2q33.1         | 203070910  | 203103331  | 0.0019 | 0.0239 | 0.6011 | 2  | 6  | 0 |
| FNTA        | 8  | 8p11.21        | 42911442   | 42940923   | 0.0019 | 0.0239 | 0.6012 | 5  | 3  | 0 |
| BLMH        | 17 | 17q11.2        | 28575223   | 28619074   | 0.0019 | 0.0238 | 0.6014 | 0  | 7  | 0 |
| RAD51AP1    | 12 | 12p13.32       | 4647950    | 4669213    | 0.0019 | 0.0237 | 0.6015 | 14 | 6  | 0 |
| RFWDD       | 16 | 16q23.1        | 74655297   | 74700779   | 0.0019 | 0.0237 | 0.6016 | 2  | 9  | 0 |
| RAB11A      | 15 | 15q22.31       | 66161789   | 66181792   | 0.0019 | 0.0237 | 0.6016 | 3  | 6  | 0 |
| TRAF3       | 14 | 14q32.32       | 103243816  | 103372628  | 0.0019 | 0.0237 | 0.6017 | 1  | 8  | 0 |
| FREQ        | 9  | 9q34.11        | 132934857  | 132999583  | 0.0019 | 0.0237 | 0.6017 | 3  | 7  | 0 |
| RAB32       | 6  | 6q24.3         | 146864828  | 146876088  | 0.0019 | 0.0237 | 0.6017 | 5  | 5  | 1 |
| FTSJD2      | 6  | 6p21.2         | 37400907   | 37450603   | 0.0019 | 0.0237 | 0.6018 | 11 | 2  | 0 |
| LEFTY1      | 1  | 1q42.12        | 226073983  | 226111965  | 0.0019 | 0.0236 | 0.6019 | 17 | 0  | 0 |
| CGNL1       | 15 | 15q21.3        | 57668705   | 57842920   | 0.0019 | 0.0236 | 0.6020 | 1  | 5  | 0 |
| COX6B1      | 19 | 19q13.12       | 36139155   | 36149683   | 0.0019 | 0.0236 | 0.6020 | 5  | 1  | 0 |
| ING2        | 4  | 4q35.1         | 184426220  | 184432249  | 0.0018 | 0.0235 | 0.6022 | 2  | 9  | 0 |
| ARID1B      | 6  | 6q25.3         | 157099064  | 157530401  | 0.0018 | 0.0235 | 0.6022 | 4  | 8  | 0 |
| PPP1R2      | 3  | 3q29           | 195241225  | 195270224  | 0.0018 | 0.0235 | 0.6023 | 11 | 2  | 0 |
| LRRCD3      | 12 | 12p13.31       | 6982553    | 7023405    | 0.0018 | 0.0235 | 0.6023 | 11 | 3  | 0 |
| GLT2SD1     | 19 | 19p13.11       | 17666460   | 17693965   | 0.0018 | 0.0233 | 0.6028 | 3  | 3  | 0 |
| KLHL3       | 5  | 5q31.2         | 136953189  | 137071779  | 0.0018 | 0.0233 | 0.6029 | 2  | 15 | 0 |
| RP11-63L7.3 | 6  | 6q15           | 89805679   | 89827800   | 0.0018 | 0.0233 | 0.6029 | 6  | 2  | 0 |
| WDR34       | 9  | 9q34.11        | 131395940  | 131419129  | 0.0018 | 0.0233 | 0.6029 | 3  | 7  | 0 |
| ERP27       | 12 | 12p12.3        | 15066974   | 15091483   | 0.0018 | 0.0233 | 0.6029 | 7  | 5  | 0 |
| ZNFR622     | 5  | 5p15.1         | 16451629   | 16465898   | 0.0018 | 0.0232 | 0.6030 | 8  | 5  | 0 |
| SUDS3       | 12 | 12q24.23       | 118814358  | 118855940  | 0.0018 | 0.0232 | 0.6032 | 1  | 7  | 0 |
| RNF168      | 16 | 16q24.3        | 38763910   | 387772811  | 0.0018 | 0.0232 | 0.6032 | 2  | 2  | 0 |
| AC130686.6  | 17 | 17q21.2        | 39958199   | 39968815   | 0.0018 | 0.0231 | 0.6033 | 2  | 11 | 0 |
| ZC3HC1      | 7  | 7q32.2         | 128658127  | 128691233  | 0.0018 | 0.0231 | 0.6034 | 9  | 0  | 0 |
| TA5FL       | 1  | 1q42.13        | 229728958  | 229761794  | 0.0018 | 0.0231 | 0.6034 | 18 | 0  | 1 |
| ITPKA       | 15 | 15q15.1        | 41785591   | 41795743   | 0.0018 | 0.0231 | 0.6036 | 0  | 10 | 0 |
| DCP1B       | 12 | 12p13.33       | 2055216    | 2113677    | 0.0018 | 0.0231 | 0.6037 | 16 | 3  | 2 |
| PALLD       | 4  | 4q32.3         | 169418217  | 169849608  | 0.0018 | 0.0230 | 0.6037 | 2  | 6  | 1 |
| SDN1        | 7  | 7q32.1         | 127292202  | 127732658  | 0.0018 | 0.0230 | 0.6038 | 10 | 1  | 0 |
| BAG1        | 9  | 9p13.3         | 33252477   | 33264761   | 0.0018 | 0.0230 | 0.6038 | 3  | 9  | 0 |
| DEDD        | 1  | 1q23.3         | 161090767  | 161102478  | 0.0018 | 0.0229 | 0.6041 | 19 | 0  | 2 |
| EIF1        | 17 | 17q21.2        | 39845127   | 39847898   | 0.0018 | 0.0228 | 0.6043 | 2  | 11 | 0 |
| SNRPD2      | 19 | 19q13.32       | 46190719   | 46195442   | 0.0018 | 0.0228 | 0.6045 | 3  | 9  | 0 |
| MTR         | 1  | 1q43           | 236958581  | 237067281  | 0.0018 | 0.0228 | 0.6045 | 22 | 0  | 2 |
| ZNFR2       | 7  | 7q11.21        | 64838752   | 64866038   | 0.0018 | 0.0228 | 0.6045 | 5  | 1  | 2 |
| EEF1B2      | 2  | 2q33.3         | 207024318  | 207027651  | 0.0018 | 0.0228 | 0.6045 | 2  | 4  | 0 |
| MCM7        | 7  | 7q22.1         | 99690404   | 99699427   | 0.0017 | 0.0227 | 0.6047 | 4  | 2  | 0 |
| FASTKD5     | 20 | 20p13          | 3127167    | 3140532    | 0.0017 | 0.0227 | 0.6048 | 2  | 7  | 0 |
| EIF3D       | 22 | 22q12.3        | 36891826   | 36925277   | 0.0017 | 0.0227 | 0.6048 | 3  | 7  | 0 |
| C20orf196   | 20 | 20p12.3        | 5731047    | 5845020    | 0.0017 | 0.0227 | 0.6048 | 3  | 7  | 0 |
| HDHD2       | 18 | 18q21.1        | 44633782   | 44676871   | 0.0017 | 0.0227 | 0.6049 | 6  | 7  | 0 |
| BTBD1       | 15 | 15q25.2        | 83685185   | 83736106   | 0.0017 | 0.0226 | 0.6049 | 5  | 6  | 0 |
| TMEM147     | 19 | 19q13.12       | 36036532   | 36038428   | 0.0017 | 0.0226 | 0.6049 | 5  | 1  | 0 |
| TOPBP1      | 3  | 3q22.1         | 133319450  | 133380737  | 0.0017 | 0.0225 | 0.6053 | 9  | 0  | 0 |
| EVIS        | 1  | 1p22.1         | 92974253   | 93257961   | 0.0017 | 0.0225 | 0.6053 | 5  | 8  | 0 |
| DYNC112     | 2  | 2q31.1         | 172543919  | 172604930  | 0.0017 | 0.0225 | 0.6054 | 6  | 3  | 0 |
| PTPN2       | 18 | 18p11.21       | 12785485   | 12884334   | 0.0017 | 0.0225 | 0.6054 | 5  | 2  | 0 |
| C20orf94    | 20 | 20p12.2        | 10415949   | 10604027   | 0.0017 | 0.0225 | 0.6055 | 3  | 7  | 1 |
| DENR        | 12 | 12q24.31       | 123237371  | 123255953  | 0.0017 | 0.0225 | 0.6056 | 2  | 6  | 0 |
| RIN2        | 20 | 20p11.23       | 19867314   | 19963100   | 0.0017 | 0.0225 | 0.6056 | 4  | 6  | 0 |
| VASH2       | 1  | 1q32.3         | 213123854  | 213454927  | 0.0017 | 0.0224 | 0.6058 | 17 | 2  | 0 |
| HINT1       | 5  | 5q23.3         | 130494975  | 130501034  | 0.0017 | 0.0223 | 0.6061 | 2  | 15 | 0 |
| CBY1        | 22 | 22q13.1        | 39052645   | 39069851   | 0.0017 | 0.0222 | 0.6062 | 2  | 6  | 0 |
| ACTL6A      | 3  | 3q26.33        | 179280708  | 179306188  | 0.0017 | 0.0222 | 0.6063 | 16 | 0  | 0 |
| MOBK13      | 2  | 2q33.1         | 198380305  | 198417505  | 0.0017 | 0.0222 | 0.6064 | 3  | 6  | 0 |
| C11orf51    | 11 | 11q13.4        | 71820635   | 71823826   | 0.0017 | 0.0221 | 0.6065 | 4  | 4  | 0 |
| CRKRS       | 17 | 17q12          | 37617739   | 37690799   | 0.0017 | 0.0221 | 0.6066 | 3  | 9  | 0 |
| SLC39A10    | 2  | 2q32.3         | 196440701  | 196602426  | 0.0017 | 0.0220 | 0.6067 | 5  | 3  | 0 |
| MMACHC      | 1  | 1p34.1         | 45965725   | 45976739   | 0.0017 | 0.0219 | 0.6070 | 3  | 3  | 0 |
| VTA1        | 6  | 6q24.1         | 142468394  | 142542083  | 0.0017 | 0.0219 | 0.6070 | 7  | 3  | 1 |
| TERF2IP     | 16 | 16q23.1        | 75681684   | 75691328   | 0.0017 | 0.0219 | 0.6072 | 2  | 8  | 0 |
| AC106900.1  | 2  | 2q31.1         | 175212749  | 175260443  | 0.0016 | 0.0219 | 0.6073 | 6  | 3  | 0 |
| SMNDC1      | 10 | 10q25.2        | 112052799  | 112064707  | 0.0016 | 0.0218 | 0.6075 | 4  | 8  | 1 |
| C15orf40    | 15 | 15q25.2        | 83673394   | 83680358   | 0.0016 | 0.0217 | 0.6076 | 5  | 6  | 0 |
| ATRN        | 20 | 20p13          | 3451665    | 3631760    | 0.0016 | 0.0217 | 0.6077 | 2  | 8  | 0 |
| LPAR2       | 19 | 19p13.11       | 19734468   | 19739039   | 0.0016 | 0.0217 | 0.6078 | 4  | 3  | 0 |
| HSPB11      | 1  | 1p32.3         | 54387234   | 54411975   | 0.0016 | 0.0217 | 0.6078 | 6  | 7  | 0 |
| GLRX        | 5  | 5q15           | 95149554   | 95158577   | 0.0016 | 0.0216 | 0.6081 | 0  | 13 | 0 |
| CDC14B      | 9  | 9q22.32-q22.33 | 99258569   | 99382112   | 0.0016 | 0.0214 | 0.6084 | 2  | 7  | 0 |
| RNF149      | 2  | 2q11.2         | 101887684  | 101925163  | 0.0016 | 0.0214 | 0.6085 | 4  | 5  | 1 |
| TRPC4AP     | 20 | 20q11.22       | 33590215   | 33680618   | 0.0016 | 0.0214 | 0.6085 | 0  | 6  | 0 |
| ENOSF1      | 18 | 18p11.32       | 672557     | 712676     | 0.0016 | 0.0214 | 0.6085 | 9  | 4  | 0 |
| L2HGDH      | 14 | 14q21.3        | 50704314   | 50778947   | 0.0016 | 0.0214 | 0.6086 | 4  | 7  | 0 |
| SMAD1       | 4  | 4q31.21        | 146402951  | 146480323  | 0.0016 | 0.0214 | 0.6086 | 4  | 6  | 0 |
| CSDA        | 12 | 12p13.2        | 10851676   | 10875953   | 0.0016 | 0.0214 | 0.6087 | 7  | 5  | 0 |
| DNAJC2      | 7  | 7q22.1         | 102952921  | 102985320  | 0.0016 | 0.0214 | 0.6087 | 7  | 4  | 0 |
| LAFM4B      | 8  | 8q22.1         | 38787809   | 38964826   | 0.0016 | 0.0214 | 0.6088 | 18 | 0  | 1 |
| UXS1        | 2  | 2q12.2         | 106707870  | 1068610795 | 0.0016 | 0.0214 | 0.6088 | 5  | 6  | 1 |
| PRMT2       | 21 | 21q22.3        | 48055527   |            |        |        |        |    |    |   |

Supplementary Table 6  
Page 22

|            |    |  |          |           |           |        |        |        |    |    |   |
|------------|----|--|----------|-----------|-----------|--------|--------|--------|----|----|---|
| PHACTR4    | 1  |  | 1p35.3   | 28696093  | 28826878  | 0.0013 | 0.0188 | 0.6167 | 0  | 9  | 0 |
| PRR11      | 17 |  | 17q22    | 57233101  | 57279924  | 0.0013 | 0.0187 | 0.6171 | 5  | 4  | 0 |
| HIBADH     | 7  |  | 7p15.2   | 27565063  | 27702602  | 0.0013 | 0.0185 | 0.6175 | 4  | 6  | 0 |
| ELF1       | 13 |  | 13q14.11 | 41506056  | 41635576  | 0.0013 | 0.0185 | 0.6176 | 2  | 6  | 0 |
| SSPN       | 12 |  | 12p12.1  | 26348269  | 26387706  | 0.0013 | 0.0185 | 0.6178 | 8  | 4  | 0 |
| PI4KB      | 1  |  | 1q21.3   | 151264413 | 151299912 | 0.0013 | 0.0184 | 0.6178 | 16 | 1  | 0 |
| SPG21      | 15 |  | 15q22.31 | 65255364  | 65282251  | 0.0013 | 0.0184 | 0.6179 | 2  | 5  | 0 |
| UBE2V2     | 8  |  | 8q11.21  | 48920995  | 48974450  | 0.0013 | 0.0184 | 0.6181 | 9  | 2  | 0 |
| WDR37      | 10 |  | 10p15.3  | 1095478   | 1178237   | 0.0013 | 0.0184 | 0.6182 | 13 | 0  | 0 |
| FGG        | 4  |  | 4q31.3   | 155525289 | 155534119 | 0.0013 | 0.0183 | 0.6183 | 1  | 8  | 1 |
| OCLAD2     | 4  |  | 4p11     | 48887407  | 48908815  | 0.0013 | 0.0182 | 0.6187 | 0  | 9  | 0 |
| ADSS       | 1  |  | 1q44     | 244538402 | 244615413 | 0.0013 | 0.0181 | 0.6189 | 18 | 0  | 1 |
| CCDC43     | 17 |  | 17q21.31 | 42754805  | 42767165  | 0.0013 | 0.0181 | 0.6189 | 1  | 11 | 0 |
| ZDHHC7     | 16 |  | 16q24.1  | 85008069  | 85045141  | 0.0013 | 0.0181 | 0.6190 | 3  | 9  | 0 |
| PARP2      | 14 |  | 14q11.2  | 20811773  | 20826062  | 0.0013 | 0.0180 | 0.6191 | 2  | 4  | 0 |
| GUCY1A3    | 4  |  | 4q32.1   | 156587862 | 156658213 | 0.0013 | 0.0180 | 0.6192 | 1  | 6  | 1 |
| RRS1       | 8  |  | 8q13.1   | 67341263  | 67342966  | 0.0012 | 0.0179 | 0.6194 | 16 | 1  | 0 |
| GPR180     | 13 |  | 13q32.1  | 95254104  | 95281946  | 0.0012 | 0.0178 | 0.6198 | 9  | 4  | 1 |
| SERF2      | 15 |  | 15q15.3  | 44069298  | 44095241  | 0.0012 | 0.0178 | 0.6198 | 0  | 10 | 0 |
| MRPS35     | 12 |  | 12p11.22 | 27863729  | 27909227  | 0.0012 | 0.0178 | 0.6199 | 8  | 5  | 0 |
| NCAPH2     | 22 |  | 22q13.33 | 50946645  | 50961911  | 0.0012 | 0.0177 | 0.6200 | 6  | 5  | 0 |
| ATP1B1     | 1  |  | 1q24.2   | 169074935 | 169101960 | 0.0012 | 0.0177 | 0.6200 | 17 | 1  | 1 |
| MTDH       | 8  |  | 8q22.1   | 98656407  | 98742488  | 0.0012 | 0.0177 | 0.6201 | 18 | 0  | 1 |
| ASNSD1     | 2  |  | 2q32.2   | 190526125 | 190535556 | 0.0012 | 0.0177 | 0.6201 | 6  | 2  | 0 |
| HARS2      | 5  |  | 5q31.3   | 140071018 | 140078889 | 0.0012 | 0.0177 | 0.6202 | 0  | 12 | 0 |
| HERC2      | 15 |  | 15q13.1  | 28356186  | 28567295  | 0.0012 | 0.0177 | 0.6202 | 2  | 8  | 0 |
| ARIH1      | 15 |  | 15q24.1  | 72766667  | 72878895  | 0.0012 | 0.0177 | 0.6203 | 5  | 6  | 0 |
| PEBP1      | 12 |  | 12q24.23 | 118573670 | 118583367 | 0.0012 | 0.0177 | 0.6203 | 2  | 7  | 0 |
| WWP1       | 8  |  | 8q21.3   | 87386270  | 87479705  | 0.0012 | 0.0177 | 0.6204 | 11 | 1  | 1 |
| UBAP2L     | 1  |  | 1q21.3   | 154192655 | 154243986 | 0.0012 | 0.0176 | 0.6205 | 15 | 0  | 0 |
| LATS2      | 13 |  | 13q12.11 | 21547178  | 21635722  | 0.0012 | 0.0176 | 0.6207 | 1  | 2  | 0 |
| CCT3       | 1  |  | 1q22     | 156278752 | 156337664 | 0.0012 | 0.0176 | 0.6207 | 15 | 0  | 0 |
| ZNFB10     | 19 |  | 19q13.41 | 52839561  | 52870366  | 0.0012 | 0.0175 | 0.6209 | 3  | 5  | 0 |
| RAD23A     | 19 |  | 19p13.2  | 13056654  | 13064448  | 0.0012 | 0.0175 | 0.6210 | 4  | 4  | 0 |
| AC008806.4 | 19 |  | 19q13.12 | 37825568  | 37855355  | 0.0012 | 0.0174 | 0.6212 | 5  | 3  | 1 |
| SNX25      | 4  |  | 4q35.1   | 186131284 | 186290948 | 0.0012 | 0.0174 | 0.6212 | 4  | 10 | 0 |
| CCT5       | 5  |  | 5p15.2   | 10250282  | 10266501  | 0.0012 | 0.0174 | 0.6213 | 9  | 6  | 1 |
| RNF13      | 3  |  | 3q25.1   | 149530475 | 149679926 | 0.0012 | 0.0174 | 0.6214 | 14 | 1  | 0 |
| UPF1       | 19 |  | 19p13.11 | 18942744  | 18979038  | 0.0012 | 0.0174 | 0.6215 | 4  | 3  | 0 |
| HARS       | 5  |  | 5q31.3   | 140053491 | 140070971 | 0.0012 | 0.0174 | 0.6216 | 0  | 12 | 0 |
| C1orf74    | 1  |  | 1q32.2   | 209955661 | 209957904 | 0.0012 | 0.0174 | 0.6216 | 17 | 3  | 0 |
| FAM98C     | 19 |  | 19q13.2  | 38893775  | 38899728  | 0.0012 | 0.0174 | 0.6216 | 4  | 6  | 1 |
| SLC25A4    | 4  |  | 4q35.1   | 186064398 | 186068424 | 0.0012 | 0.0173 | 0.6217 | 4  | 10 | 0 |
| P2RY5      | 13 |  | 13q14.2  | 48985184  | 49018840  | 0.0012 | 0.0173 | 0.6217 | 2  | 7  | 0 |
| ROCK2      | 2  |  | 2p25.1   | 11321778  | 11484711  | 0.0012 | 0.0173 | 0.6218 | 6  | 4  | 0 |
| WDR40A     | 9  |  | 9p13.3   | 34086386  | 34134694  | 0.0012 | 0.0173 | 0.6218 | 3  | 9  | 0 |
| NAG        | 2  |  | 2p24.3   | 15307032  | 15701454  | 0.0012 | 0.0173 | 0.6219 | 4  | 2  | 0 |
| ARHGEF11   | 1  |  | 1q23.1   | 156904633 | 157015162 | 0.0012 | 0.0173 | 0.6219 | 17 | 0  | 1 |
| MEF2A      | 15 |  | 15q26.3  | 100106133 | 100256627 | 0.0012 | 0.0173 | 0.6220 | 13 | 2  | 0 |
| YTHDF1     | 20 |  | 20q13.33 | 61826784  | 61847538  | 0.0012 | 0.0173 | 0.6221 | 9  | 7  | 0 |
| TTC1       | 5  |  | 5q33.3   | 159436180 | 159492550 | 0.0012 | 0.0172 | 0.6224 | 1  | 12 | 0 |
| CYBRD1     | 2  |  | 2q31.1   | 172378757 | 172414643 | 0.0012 | 0.0171 | 0.6225 | 6  | 3  | 0 |
| YTHDF3     | 8  |  | 8q12.3   | 64081437  | 64100416  | 0.0012 | 0.0171 | 0.6226 | 16 | 1  | 0 |
| TRIM59     | 3  |  | 3q25.33  | 160153292 | 160167626 | 0.0012 | 0.0171 | 0.6228 | 16 | 0  | 1 |
| WRNIP1     | 6  |  | 6p25.2   | 2765666   | 2786939   | 0.0011 | 0.0170 | 0.6231 | 12 | 3  | 0 |
| PERLD1     | 17 |  | 17q12    | 37827376  | 37844310  | 0.0011 | 0.0170 | 0.6232 | 3  | 9  | 0 |
| P2RX5      | 17 |  | 17p13.2  | 3575748   | 3589583   | 0.0011 | 0.0170 | 0.6233 | 0  | 10 | 0 |
| H2AFZ      | 4  |  | 4q23     | 100869242 | 100871512 | 0.0011 | 0.0170 | 0.6234 | 3  | 4  | 0 |
| LRRCS8     | 1  |  | 1p36.21  | 13801470  | 13840242  | 0.0011 | 0.0168 | 0.6237 | 0  | 13 | 0 |
| SLBP       | 4  |  | 4p16.3   | 1694527   | 1714037   | 0.0011 | 0.0168 | 0.6239 | 1  | 8  | 0 |
| C9orf100   | 9  |  | 9p13.3   | 35659341  | 35669610  | 0.0011 | 0.0167 | 0.6241 | 5  | 9  | 0 |
| ACTR1A     | 10 |  | 10q24.32 | 104238987 | 104262512 | 0.0011 | 0.0167 | 0.6241 | 0  | 7  | 0 |
| MRPS30     | 5  |  | 5p12     | 44809027  | 44815614  | 0.0011 | 0.0167 | 0.6241 | 5  | 4  | 0 |
| DXH40      | 17 |  | 17q23.1  | 57642886  | 57685702  | 0.0011 | 0.0167 | 0.6242 | 5  | 4  | 0 |
| FADD       | 11 |  | 11q13.3  | 70049269  | 70053508  | 0.0011 | 0.0167 | 0.6242 | 9  | 2  | 2 |
| FAF2       | 5  |  | 5q35.2   | 175875356 | 175937065 | 0.0011 | 0.0167 | 0.6242 | 4  | 7  | 0 |
| CPEB4      | 5  |  | 5q35.2   | 173315331 | 173387313 | 0.0011 | 0.0167 | 0.6242 | 1  | 12 | 0 |
| ELP4       | 11 |  | 11p13    | 31531297  | 31805327  | 0.0011 | 0.0167 | 0.6243 | 5  | 1  | 0 |
| POLR2F     | 22 |  | 22q13.1  | 38349674  | 38437113  | 0.0011 | 0.0167 | 0.6244 | 1  | 7  | 0 |
| VPS29      | 12 |  | 12q24.11 | 110929330 | 110939916 | 0.0011 | 0.0167 | 0.6244 | 2  | 7  | 0 |
| MAGOHB     | 12 |  | 12p13.2  | 10756794  | 10766193  | 0.0011 | 0.0166 | 0.6246 | 7  | 4  | 0 |
| BCL2L10    | 15 |  | 15q21.2  | 52401822  | 52404972  | 0.0011 | 0.0166 | 0.6246 | 1  | 6  | 0 |
| TRAF3IP2   | 6  |  | 6q21     | 111877657 | 111927264 | 0.0011 | 0.0166 | 0.6247 | 7  | 2  | 0 |
| LTB4R      | 14 |  | 14q12    | 24780705  | 24787242  | 0.0011 | 0.0166 | 0.6248 | 3  | 4  | 0 |
| C17orf71   | 17 |  | 17q22    | 57287371  | 57292608  | 0.0011 | 0.0166 | 0.6249 | 5  | 4  | 0 |
| SMG7       | 1  |  | 1q25.3   | 183441634 | 183523325 | 0.0011 | 0.0165 | 0.6250 | 16 | 1  | 1 |
| TMEM208    | 16 |  | 16q22.1  | 67261016  | 67263182  | 0.0011 | 0.0165 | 0.6251 | 7  | 7  | 0 |
| IARS       | 9  |  | 9q22.31  | 94972625  | 95056038  | 0.0011 | 0.0165 | 0.6252 | 3  | 8  | 0 |
| BUD13      | 11 |  | 11q23.3  | 116618886 | 116643704 | 0.0011 | 0.0164 | 0.6253 | 5  | 5  | 0 |
| ECHDC3     | 10 |  | 10p14    | 11784356  | 11806062  | 0.0011 | 0.0164 | 0.6254 | 13 | 1  | 1 |
| IPO4       | 14 |  | 14q12    | 24649432  | 24658124  | 0.0011 | 0.0164 | 0.6255 | 3  | 4  | 0 |
| BRI3BP     | 12 |  | 12q24.31 | 125478251 | 125511045 | 0.0011 | 0.0164 | 0.6256 | 3  | 9  | 0 |
| AARS2      | 6  |  | 6p21.1   | 44266463  | 44281063  | 0.0011 | 0.0164 | 0.6257 | 14 | 2  | 0 |
| PHLPP      | 18 |  | 18q21.33 | 60382734  | 60647666  | 0.0011 | 0.0164 | 0.6257 | 6  | 8  | 0 |
| TCF8       | 8  |  | 8q21.11  | 74858634  | 74884346  | 0.0011 | 0.0164 | 0.6257 | 13 | 1  | 0 |
| RPS6       | 9  |  | 9p22.1   | 1937624   | 19380235  | 0.0011 | 0.0164 | 0.6257 | 4  | 9  | 0 |
| APOL2      | 22 |  | 22q12.3  | 36822255  | 36836000  | 0.0011 | 0.0163 | 0.6259 | 4  | 8  | 0 |
| DENND1B    | 1  |  | 1q31.3   | 197473878 | 197744763 | 0.0011 | 0.0163 | 0.6260 | 16 | 2  | 0 |
| MYST2      | 17 |  | 17q21.33 | 47866058  | 47906456  | 0.0011 | 0.0163 | 0.6260 | 1  | 7  | 0 |
| LRRC42     | 1  |  | 1p32.3   | 54411750  | 54433841  | 0.0011 | 0.0163 | 0.6261 | 6  | 7  | 0 |
| ATP9B      | 18 |  | 18q23    | 76829397  | 77138278  | 0.0011 | 0.0162 | 0.6263 | 4  | 10 | 0 |
| USP5       | 12 |  | 12p13.31 | 6961285   | 6975793   | 0.0011 | 0.0162 | 0.6265 | 11 | 3  | 0 |
| ATP2C1     | 3  |  | 3q22.1   | 130613434 | 130735553 | 0.0011 | 0.0162 | 0.6265 | 7  | 0  | 0 |
| USP28      | 11 |  | 11q23.2  | 113668598 | 113746256 | 0.0011 | 0.0162 | 0.6265 | 5  | 4  | 0 |
| TNFRSF10B  | 8  |  | 8p21.3   | 22877653  | 22926700  | 0.0011 | 0.0162 | 0.6265 | 0  | 13 | 0 |
| PIGS       | 17 |  | 17q11.2  | 26880405  | 26898887  | 0.0011 | 0.0162 | 0.6266 | 1  | 9  | 0 |
| C11orf46   | 11 |  | 11p14.1  | 30344656  | 30359768  | 0.0010 | 0.0161 | 0.6267 | 6  | 1  | 0 |
| PPP1R15B   | 1  |  | 1q32.1   | 204372494 | 204380944 | 0.0010 | 0.0161 | 0.6268 | 15 | 1  | 0 |
| C1orf198   | 1  |  | 1q42.2   | 230972876 | 231005335 | 0.0010 | 0.0160 | 0.6272 | 19 | 0  | 1 |
| PKIA       | 8  |  | 8q21.12  | 79428336  | 79515485  | 0.0010 | 0.0160 | 0.6273 | 12 | 1  | 1 |
| TEP1       | 14 |  | 14q11.2  | 20835926  | 20881580  | 0.0010 | 0.0160 | 0.6274 | 2  | 4  | 0 |
| FOXO3      | 6  |  | 6q21     | 108881026 | 109005971 | 0.0010 | 0.0159 | 0.6275 | 8  | 2  | 0 |
| NUDC       | 1  |  | 1p36.11  | 27226729  | 27272888  | 0.0010 | 0.0159 | 0.6275 | 0  | 10 | 0 |
| CARHSP1    | 16 |  | 16p13.2  | 8946802   | 8962863   | 0.0010 | 0.0159 | 0.6275 | 1  | 5  | 0 |
| SPAG9      | 17 |  | 17q21.33 | 49039535  | 49198226  | 0.0010 | 0.0159 | 0.6278 | 2  | 6  | 0 |
| ZNFI80     | 19 |  | 19q13.31 | 44979861  | 45004574  | 0.0010 | 0.0158 | 0.6279 | 3  | 7  | 0 |
| ASH2L      | 8  |  | 8p11.23  | 37963011  | 37997225  | 0.0010 | 0.0158 | 0.6280 | 5  | 4  | 0 |
| FAM53C     | 5  |  | 5q31.2   | 137673224 | 137685418 | 0.0010 | 0.0158 | 0.6280 | 1  | 12 | 0 |
| USP10      | 16 |  | 16q24.1  | 84733555  | 84813525  | 0.0010 | 0.0158 | 0.6281 | 3  | 9  | 0 |
| TMEM70     | 8  |  | 8q21.11  | 74888430  | 74895011  | 0.0010 | 0      |        |    |    |   |

Supplementary Table 6  
Page 23

|           |    |  |                 |           |           |        |        |        |    |    |   |
|-----------|----|--|-----------------|-----------|-----------|--------|--------|--------|----|----|---|
| MOCS2     | 5  |  | 5q11.2          | 52391509  | 52405598  | 0.0009 | 0.0147 | 0.6336 | 0  | 12 | 0 |
| BRPF1     | 3  |  | 3p25.3          | 9773429   | 9789669   | 0.0009 | 0.0147 | 0.6337 | 7  | 2  | 0 |
| FAM96B    | 16 |  | 16q22.1         | 66965959  | 66968320  | 0.0009 | 0.0147 | 0.6338 | 8  | 7  | 0 |
| C6orf225  | 6  |  | 6q21            | 112408674 | 112423992 | 0.0009 | 0.0146 | 0.6339 | 7  | 2  | 0 |
| MXD3      | 5  |  | 5q35.3          | 176732501 | 176739292 | 0.0009 | 0.0146 | 0.6339 | 4  | 6  | 0 |
| ATP5G3    | 2  |  | 2q31.1          | 176040991 | 176046490 | 0.0009 | 0.0146 | 0.6340 | 6  | 3  | 0 |
| E1F3K     | 19 |  | 19q13.2         | 39109722  | 39127595  | 0.0009 | 0.0146 | 0.6340 | 4  | 6  | 0 |
| NPC1      | 18 |  | 18q11.2         | 21111465  | 21166470  | 0.0009 | 0.0146 | 0.6342 | 8  | 3  | 1 |
| PDCD11    | 10 |  | 10q24.33        | 105156412 | 105206019 | 0.0009 | 0.0145 | 0.6344 | 0  | 8  | 0 |
| KIAA1147  | 7  |  | 7q34            | 141356528 | 141401953 | 0.0009 | 0.0145 | 0.6344 | 11 | 0  | 0 |
| ATP5A1    | 18 |  | 18q21.1         | 43664110  | 43684199  | 0.0009 | 0.0145 | 0.6344 | 3  | 9  | 0 |
| NUP153    | 6  |  | 6p22.3          | 17615269  | 17706818  | 0.0009 | 0.0145 | 0.6346 | 10 | 0  | 0 |
| PTPN3     | 9  |  | 9q31.3          | 112137746 | 112260593 | 0.0009 | 0.0144 | 0.6348 | 1  | 10 | 0 |
| TARS2     | 1  |  | 1q21.3          | 150459893 | 150480078 | 0.0009 | 0.0144 | 0.6348 | 15 | 1  | 0 |
| INTS10    | 8  |  | 8p21.3          | 19674918  | 19709584  | 0.0009 | 0.0144 | 0.6349 | 1  | 11 | 0 |
| PSMC4     | 19 |  | 19q13.2         | 40477073  | 40487351  | 0.0009 | 0.0144 | 0.6350 | 3  | 7  | 0 |
| OSBP      | 11 |  | 11q12.1         | 59341871  | 59383617  | 0.0009 | 0.0144 | 0.6350 | 7  | 1  | 0 |
| NFYA      | 6  |  | 6p21.1          | 41040707  | 41076133  | 0.0008 | 0.0143 | 0.6354 | 14 | 2  | 0 |
| PTPRA     | 20 |  | 20p13           | 2844841   | 3019320   | 0.0008 | 0.0142 | 0.6354 | 2  | 7  | 0 |
| FAM136A   | 2  |  | 2p13.3          | 70523109  | 70529220  | 0.0008 | 0.0142 | 0.6355 | 4  | 0  | 0 |
| NKIRAS2   | 17 |  | 17q21.2         | 40169038  | 40177654  | 0.0008 | 0.0142 | 0.6355 | 1  | 11 | 0 |
| FAIM3     | 1  |  | 1q32.1          | 207076636 | 207096592 | 0.0008 | 0.0142 | 0.6357 | 16 | 1  | 0 |
| CXorf56   | 23 |  | 23q24           | 118672112 | 118699364 | 0.0008 | 0.0142 | 0.6358 | 1  | 11 | 0 |
| PSMB1     | 6  |  | 6q27            | 170844205 | 170862417 | 0.0008 | 0.0142 | 0.6358 | 2  | 7  | 0 |
| AP1GBP1   | 17 |  | 17q12           | 35877940  | 35969520  | 0.0008 | 0.0142 | 0.6358 | 3  | 10 | 0 |
| FBXO45    | 3  |  | 3q29            | 196295482 | 196315928 | 0.0008 | 0.0142 | 0.6359 | 11 | 1  | 0 |
| SENP6     | 6  |  | 6q14.1          | 76311600  | 76427997  | 0.0008 | 0.0142 | 0.6359 | 7  | 1  | 0 |
| WAPAL     | 10 |  | 10q23.2         | 88195013  | 88281572  | 0.0008 | 0.0142 | 0.6360 | 4  | 5  | 0 |
| TMEM18    | 2  |  | 2p25.3          | 687973    | 6771439   | 0.0008 | 0.0141 | 0.6361 | 9  | 3  | 0 |
| ZNRF15    | 19 |  | 19q13.41        | 52467594  | 52627345  | 0.0008 | 0.0141 | 0.6361 | 3  | 5  | 0 |
| PRPF4B    | 6  |  | 6p25.2          | 4021569   | 4065217   | 0.0008 | 0.0141 | 0.6361 | 9  | 3  | 0 |
| PTPN11    | 12 |  | 12q24.13        | 112856536 | 112947716 | 0.0008 | 0.0141 | 0.6361 | 2  | 8  | 0 |
| ZADH2     | 18 |  | 18q22.3         | 72910489  | 72921117  | 0.0008 | 0.0141 | 0.6361 | 5  | 9  | 0 |
| NME7      | 1  |  | 1q24.2          | 169101775 | 169337186 | 0.0008 | 0.0141 | 0.6362 | 17 | 1  | 1 |
| ITFG2     | 12 |  | 12p13.33        | 2921863   | 2934106   | 0.0008 | 0.0141 | 0.6363 | 13 | 4  | 0 |
| RFK       | 9  |  | 9q21.13         | 79000433  | 79009444  | 0.0008 | 0.0141 | 0.6363 | 3  | 6  | 0 |
| PPAN      | 19 |  | 19p13.2         | 10216899  | 10226065  | 0.0008 | 0.0141 | 0.6365 | 2  | 4  | 0 |
| LGTN      | 1  |  | 1q32.1          | 206764977 | 206785904 | 0.0008 | 0.0140 | 0.6367 | 16 | 1  | 0 |
| PANK3     | 5  |  | 5q34            | 167982630 | 168006588 | 0.0008 | 0.0140 | 0.6367 | 2  | 14 | 0 |
| MUS81     | 11 |  | 11q13.1         | 65627872  | 65633912  | 0.0008 | 0.0140 | 0.6370 | 5  | 1  | 0 |
| CALCOCO2  | 17 |  | 17q21.32        | 46908372  | 46942228  | 0.0008 | 0.0139 | 0.6372 | 1  | 7  | 0 |
| ZNF672    | 1  |  | 1q44            | 249132530 | 249143713 | 0.0008 | 0.0139 | 0.6373 | 17 | 0  | 1 |
| CREBZF    | 11 |  | 11q14.1         | 85371885  | 85376146  | 0.0008 | 0.0139 | 0.6373 | 6  | 3  | 0 |
| MFSND     | 2  |  | 2q12.1          | 103333497 | 103353347 | 0.0008 | 0.0139 | 0.6374 | 4  | 6  | 1 |
| IL27RA    | 19 |  | 19p13.12        | 14142262  | 14164026  | 0.0008 | 0.0139 | 0.6375 | 5  | 3  | 0 |
| MUT       | 6  |  | 6p12.3          | 49398999  | 49431031  | 0.0008 | 0.0138 | 0.6375 | 11 | 0  | 0 |
| JOSD1     | 22 |  | 22q13.1         | 39081548  | 39097561  | 0.0008 | 0.0137 | 0.6378 | 2  | 6  | 0 |
| PPARBP    | 17 |  | 17q12           | 37560549  | 37607527  | 0.0008 | 0.0137 | 0.6378 | 3  | 9  | 0 |
| RTN4IP1   | 6  |  | 6q21            | 107018903 | 107077373 | 0.0008 | 0.0137 | 0.6378 | 7  | 3  | 0 |
| VPS16     | 20 |  | 20p13           | 2821373   | 2847377   | 0.0008 | 0.0137 | 0.6378 | 2  | 7  | 0 |
| NAPEPLD   | 7  |  | 7q22.1          | 102740023 | 102790007 | 0.0008 | 0.0137 | 0.6380 | 7  | 3  | 0 |
| INSIG2    | 2  |  | 2q14.2          | 118846028 | 118867596 | 0.0008 | 0.0136 | 0.6384 | 2  | 10 | 0 |
| ACAP2     | 3  |  | 3q29            | 194995475 | 195163817 | 0.0008 | 0.0136 | 0.6385 | 11 | 2  | 0 |
| CHST12    | 7  |  | 7p22.3          | 2443207   | 2473693   | 0.0008 | 0.0136 | 0.6386 | 4  | 6  | 0 |
| TRIM14    | 9  |  | 9q22.33         | 100831557 | 100881492 | 0.0008 | 0.0136 | 0.6386 | 3  | 8  | 0 |
| PANK4     | 1  |  | 1p36.32         | 2439975   | 2458050   | 0.0008 | 0.0136 | 0.6387 | 4  | 13 | 0 |
| RPAP2     | 1  |  | 1p22.1          | 92764605  | 92853729  | 0.0008 | 0.0135 | 0.6390 | 5  | 8  | 0 |
| RNF20     | 9  |  | 9q31.1          | 104293613 | 104325626 | 0.0008 | 0.0135 | 0.6390 | 2  | 6  | 0 |
| SNRNP70   | 19 |  | 19q13.33        | 49588465  | 49611869  | 0.0008 | 0.0135 | 0.6392 | 3  | 7  | 0 |
| ASB13     | 10 |  | 10p15.1         | 5674917   | 5708558   | 0.0008 | 0.0135 | 0.6392 | 15 | 0  | 1 |
| FOXJ2     | 12 |  | 12p13.31        | 8185359   | 8208117   | 0.0008 | 0.0135 | 0.6392 | 8  | 4  | 0 |
| COQ2      | 4  |  | 4q21.23         | 84184979  | 84206067  | 0.0008 | 0.0135 | 0.6392 | 3  | 5  | 0 |
| CMC1      | 3  |  | 3p24.1          | 28283109  | 28361264  | 0.0008 | 0.0135 | 0.6393 | 6  | 5  | 0 |
| TOMM5     | 9  |  | 9p13.2          | 37588417  | 37592636  | 0.0008 | 0.0134 | 0.6394 | 7  | 9  | 0 |
| SBF2      | 11 |  | 11p15.4         | 9800216   | 10315754  | 0.0008 | 0.0134 | 0.6394 | 3  | 5  | 0 |
| AGAP1     | 2  |  | 2q37.2          | 236402733 | 237035198 | 0.0008 | 0.0134 | 0.6395 | 2  | 11 | 0 |
| MAK16     | 8  |  | 8p12            | 33342685  | 33358775  | 0.0008 | 0.0134 | 0.6395 | 2  | 10 | 0 |
| MYO10     | 5  |  | 5p15.1          | 16662019  | 16936385  | 0.0008 | 0.0134 | 0.6396 | 6  | 4  | 0 |
| PTGR1     | 9  |  | 9q31.3          | 114325253 | 114362135 | 0.0008 | 0.0134 | 0.6397 | 2  | 8  | 0 |
| TIAL1     | 10 |  | 10q26.11        | 121332980 | 121356541 | 0.0008 | 0.0134 | 0.6397 | 2  | 7  | 0 |
| RAB11FIP2 | 10 |  | 10q26.11        | 119764429 | 119806114 | 0.0008 | 0.0134 | 0.6399 | 3  | 7  | 0 |
| AARSD1    | 17 |  | 17q21.31        | 41102547  | 41132545  | 0.0008 | 0.0133 | 0.6400 | 1  | 11 | 0 |
| WDR25     | 14 |  | 14q32.2         | 100842793 | 100996640 | 0.0008 | 0.0133 | 0.6401 | 2  | 10 | 0 |
| CLPX      | 15 |  | 15q22.31        | 65442784  | 65477563  | 0.0008 | 0.0133 | 0.6402 | 2  | 5  | 0 |
| C11orf16  | 11 |  | 11p15.4         | 8941624   | 8954553   | 0.0008 | 0.0133 | 0.6402 | 4  | 6  | 0 |
| CDC73     | 1  |  | 1q31.2          | 193090919 | 193221056 | 0.0008 | 0.0133 | 0.6402 | 16 | 1  | 1 |
| DYNC1L1   | 3  |  | 3p22.3          | 32567469  | 32612350  | 0.0008 | 0.0133 | 0.6402 | 6  | 5  | 0 |
| ZC3H11A   | 1  |  | 1q32.1          | 203764751 | 203823255 | 0.0007 | 0.0133 | 0.6404 | 14 | 1  | 1 |
| CAMK2D    | 4  |  | 4q26            | 114372188 | 114683083 | 0.0007 | 0.0133 | 0.6404 | 3  | 4  | 0 |
| ZNHIT3    | 17 |  | 17q12           | 34842473  | 34851662  | 0.0007 | 0.0133 | 0.6404 | 4  | 11 | 1 |
| TXNRD1    | 12 |  | 12q23.3         | 104609559 | 104744055 | 0.0007 | 0.0133 | 0.6405 | 1  | 10 | 0 |
| RP9P      | 7  |  | 7p14.3          | 32956427  | 32982788  | 0.0007 | 0.0133 | 0.6406 | 2  | 8  | 0 |
| ATP5B     | 12 |  | 12q13.3         | 57031963  | 57039852  | 0.0007 | 0.0132 | 0.6407 | 1  | 7  | 0 |
| POT1      | 7  |  | 7q31.33         | 124462440 | 124570037 | 0.0007 | 0.0132 | 0.6410 | 12 | 0  | 0 |
| AURP      | 2  |  | 2p13.1          | 74753772  | 74756974  | 0.0007 | 0.0131 | 0.6413 | 3  | 2  | 0 |
| NOP16     | 5  |  | 5q35.2          | 175810984 | 175815607 | 0.0007 | 0.0130 | 0.6415 | 4  | 8  | 0 |
| TUBD1     | 17 |  | 17q23.1         | 57836851  | 57970296  | 0.0007 | 0.0130 | 0.6418 | 5  | 4  | 0 |
| PET112L   | 4  |  | 4q31.3          | 152591805 | 152682134 | 0.0007 | 0.0129 | 0.6420 | 1  | 9  | 0 |
| LRFN1     | 19 |  | 19q13.2         | 39797208  | 39805976  | 0.0007 | 0.0129 | 0.6420 | 4  | 6  | 0 |
| ATP2B4    | 1  |  | 1q32.1          | 203595928 | 203713207 | 0.0007 | 0.0129 | 0.6420 | 14 | 1  | 0 |
| PPP1R14A  | 19 |  | 19q13.2         | 38741877  | 38747231  | 0.0007 | 0.0129 | 0.6421 | 4  | 5  | 1 |
| RB1       | 13 |  | 13q14.2         | 48877883  | 49056026  | 0.0007 | 0.0129 | 0.6422 | 2  | 7  | 0 |
| CXorf3    | 23 |  | 23p22.33        | 1710486   | 1721409   | 0.0007 | 0.0129 | 0.6423 | 3  | 12 | 0 |
| C17orf95  | 17 |  | 17q25.1         | 74722940  | 74729961  | 0.0007 | 0.0129 | 0.6423 | 9  | 4  | 0 |
| SMARCD2   | 17 |  | 17q23.3         | 61909441  | 61920351  | 0.0007 | 0.0129 | 0.6424 | 6  | 2  | 0 |
| SEC23IP   | 10 |  | 10q26.11-q26.12 | 121652223 | 121701245 | 0.0007 | 0.0129 | 0.6425 | 2  | 7  | 0 |
| MRPL1     | 4  |  | 4q21.1          | 78783805  | 78873944  | 0.0007 | 0.0129 | 0.6425 | 4  | 5  | 0 |
| S100A11   | 1  |  | 1q21.3          | 152004982 | 152009511 | 0.0007 | 0.0129 | 0.6425 | 17 | 1  | 1 |
| C15orf56  | 15 |  | 15q15.1         | 40542868  | 40545110  | 0.0007 | 0.0129 | 0.6425 | 0  | 9  | 0 |
| SLC22A4   | 5  |  | 5q31.1          | 131630145 | 131679892 | 0.0007 | 0.0128 | 0.6427 | 3  | 16 | 0 |
| RPL34     | 4  |  | 4q25            | 109541722 | 109551637 | 0.0007 | 0.0127 | 0.6430 | 3  | 3  | 0 |
| RAH4      | 5  |  | 5p13.2          | 34656518  | 34832716  | 0.0007 | 0.0127 | 0.6431 | 9  | 4  | 0 |
| QSER1     | 11 |  | 11p13           | 32914792  | 33001816  | 0.0007 | 0.0126 | 0.6437 | 5  | 3  | 0 |
| C20orf29  | 20 |  | 20p13           | 3801178   | 3805954   | 0.0007 | 0.0125 | 0.6440 | 2  | 8  | 0 |
| TSN       | 2  |  | 2q14.3          | 122494679 | 122525429 | 0.0007 | 0.0125 | 0.6440 | 2  | 7  | 0 |
| FAM108C1  | 15 |  | 15q25.1         | 80987652  | 81047958  | 0.0007 | 0.0125 | 0.6443 | 5  | 6  | 0 |
| MRPL17    | 11 |  | 11p15.4         | 6701616   | 6704632   | 0.0007 | 0.0124 | 0.6444 | 2  | 7  | 0 |
| OGDH      | 7  |  | 7p13            | 44646171  | 44748668  | 0.0007 | 0.0123 | 0.6448 | 1  | 6  | 0 |
| ZDHHC6    | 10 |  | 10q25.2         | 114190062 | 114206672 | 0.0007 | 0.0123 | 0.6449 | 4  | 8  | 0 |
| POLE3     | 9  |  | 9q32            | 116169521 | 116173029 | 0.0007 | 0.0123 | 0.6451 | 2  |    |   |

Supplementary Table 6  
Page 24

|            |    |              |           |           |        |        |        |    |    |   |
|------------|----|--------------|-----------|-----------|--------|--------|--------|----|----|---|
| C20orf72   | 20 | 20p11.23     | 17949716  | 17971765  | 0.0006 | 0.0109 | 0.6523 | 5  | 6  | 0 |
| QXSR1      | 3  | 3p22.2       | 38206986  | 38296979  | 0.0006 | 0.0109 | 0.6523 | 4  | 5  | 0 |
| ENY2       | 8  | 8p23.1       | 110346570 | 110355898 | 0.0006 | 0.0109 | 0.6523 | 19 | 0  | 2 |
| A2LD1      | 13 | 13q32.3      | 101183801 | 101236251 | 0.0005 | 0.0109 | 0.6525 | 11 | 4  | 1 |
| PPTC7      | 12 | 12q24.11     | 110972237 | 111021064 | 0.0005 | 0.0109 | 0.6526 | 2  | 7  | 0 |
| BCL9       | 1  | 1q21.2       | 147013182 | 147098017 | 0.0005 | 0.0108 | 0.6526 | 18 | 1  | 1 |
| THAP11     | 16 | 16q22.1      | 67876213  | 67878097  | 0.0005 | 0.0108 | 0.6527 | 6  | 7  | 0 |
| RBM18      | 9  | 9q33.2       | 125002289 | 125027118 | 0.0005 | 0.0108 | 0.6527 | 2  | 8  | 0 |
| SPAG5      | 17 | 17q11.2      | 26904585  | 26926056  | 0.0005 | 0.0108 | 0.6528 | 1  | 9  | 0 |
| ACD        | 16 | 16q22.1      | 67691416  | 67694718  | 0.0005 | 0.0108 | 0.6529 | 6  | 7  | 0 |
| AMZ2       | 17 | 17q24.2      | 66244145  | 66265039  | 0.0005 | 0.0108 | 0.6530 | 8  | 2  | 0 |
| NCBP2      | 3  | 3q29         | 196662273 | 196669465 | 0.0005 | 0.0108 | 0.6531 | 12 | 1  | 0 |
| SEN2       | 3  | 3q27.2       | 185300284 | 185348883 | 0.0005 | 0.0108 | 0.6532 | 11 | 1  | 0 |
| DAAM1      | 14 | 14q23.1      | 59655399  | 59838123  | 0.0005 | 0.0107 | 0.6534 | 2  | 9  | 0 |
| C20orf43   | 20 | 20q13.31     | 55043647  | 55093942  | 0.0005 | 0.0107 | 0.6534 | 4  | 7  | 0 |
| TBP        | 6  | 6q27         | 170863390 | 170881946 | 0.0005 | 0.0107 | 0.6535 | 3  | 6  | 0 |
| VKORC1L1   | 7  | 7q11.21      | 65338324  | 65422817  | 0.0005 | 0.0107 | 0.6537 | 3  | 3  | 1 |
| ATP5C1     | 10 | 10p14        | 7830093   | 7849755   | 0.0005 | 0.0107 | 0.6538 | 16 | 1  | 2 |
| FDX1L      | 19 | 19p13.2      | 10416103  | 10426691  | 0.0005 | 0.0106 | 0.6540 | 2  | 4  | 0 |
| CD99       | 23 | 23p22.33     | 2609228   | 2659348   | 0.0005 | 0.0106 | 0.6540 | 4  | 13 | 0 |
| RAB4A      | 1  | 1q42.13      | 229406879 | 229440517 | 0.0005 | 0.0106 | 0.6542 | 18 | 0  | 1 |
| COPA       | 1  | 1q23.2       | 160258377 | 160313354 | 0.0005 | 0.0106 | 0.6542 | 19 | 0  | 2 |
| NSMCE4A    | 10 | 10q26.13     | 123716611 | 123734710 | 0.0005 | 0.0106 | 0.6542 | 3  | 8  | 2 |
| TIMM8B     | 11 | 11q23.1      | 111955873 | 111957469 | 0.0005 | 0.0106 | 0.6543 | 5  | 2  | 0 |
| VDAC3      | 8  | 8p11.21      | 42249346  | 42263411  | 0.0005 | 0.0106 | 0.6543 | 5  | 4  | 0 |
| CARM1      | 19 | 19p13.2      | 10982253  | 11033448  | 0.0005 | 0.0106 | 0.6544 | 2  | 4  | 0 |
| ARFGEF1    | 8  | 8q13.2       | 68109897  | 68255912  | 0.0005 | 0.0106 | 0.6545 | 16 | 1  | 0 |
| TRIO       | 5  | 5p15.2       | 14143829  | 14509448  | 0.0005 | 0.0106 | 0.6545 | 9  | 5  | 1 |
| OSRP2BP    | 20 | 20p11.33     | 18118527  | 18169031  | 0.0005 | 0.0106 | 0.6546 | 4  | 6  | 0 |
| BRD1       | 22 | 22q13.33     | 50166931  | 50221190  | 0.0005 | 0.0106 | 0.6547 | 3  | 8  | 0 |
| CCDC123    | 19 | 19q13.11     | 33369908  | 33462869  | 0.0005 | 0.0106 | 0.6548 | 2  | 2  | 0 |
| COPS5      | 8  | 8q13.1       | 67955317  | 67974562  | 0.0005 | 0.0106 | 0.6548 | 16 | 1  | 0 |
| SNRPE      | 1  | 1q32.1       | 203830740 | 203840278 | 0.0005 | 0.0106 | 0.6548 | 14 | 1  | 1 |
| TUFT1      | 1  | 1q21.3       | 151512781 | 151556058 | 0.0005 | 0.0105 | 0.6550 | 16 | 1  | 0 |
| ECHDC2     | 1  | 1p32.3       | 53361904  | 53387446  | 0.0005 | 0.0105 | 0.6552 | 7  | 6  | 0 |
| PTGES2     | 9  | 9q34.11      | 130882973 | 130890712 | 0.0005 | 0.0105 | 0.6553 | 3  | 7  | 0 |
| ARMC10     | 7  | 7q22.1       | 102715328 | 102740205 | 0.0005 | 0.0105 | 0.6553 | 8  | 3  | 0 |
| TNFSF5IP1  | 18 | 18p11.21     | 12703055  | 12725737  | 0.0005 | 0.0105 | 0.6553 | 5  | 2  | 0 |
| ZNF236     | 18 | 18q23        | 74536116  | 74682680  | 0.0005 | 0.0105 | 0.6554 | 5  | 8  | 0 |
| ZNF333     | 19 | 19p13.12     | 14800870  | 14831772  | 0.0005 | 0.0104 | 0.6556 | 5  | 3  | 2 |
| ECE2       | 3  | 3q27.1       | 183967445 | 184010818 | 0.0005 | 0.0104 | 0.6556 | 12 | 1  | 0 |
| UBQLN1     | 9  | 9q21.32      | 86274879  | 86323168  | 0.0005 | 0.0104 | 0.6556 | 4  | 6  | 0 |
| MLLT1      | 19 | 19p13.3      | 6212966   | 6279959   | 0.0005 | 0.0104 | 0.6557 | 0  | 6  | 0 |
| DVL3       | 3  | 3q27.1       | 183873284 | 183891398 | 0.0005 | 0.0104 | 0.6559 | 12 | 1  | 1 |
| UBE2Q2     | 15 | 15q24.2      | 76135622  | 76193380  | 0.0005 | 0.0104 | 0.6560 | 4  | 5  | 0 |
| C20orf46   | 20 | 20p13        | 1161215   | 1165319   | 0.0005 | 0.0104 | 0.6560 | 6  | 7  | 1 |
| METTL13    | 1  | 1q24.3       | 171750761 | 171766857 | 0.0005 | 0.0104 | 0.6561 | 16 | 1  | 1 |
| ARF1       | 1  | 1q42.13      | 228270361 | 228286912 | 0.0005 | 0.0104 | 0.6562 | 18 | 0  | 0 |
| SIL1       | 5  | 5q31.2       | 138282427 | 138534065 | 0.0005 | 0.0104 | 0.6562 | 0  | 12 | 0 |
| WRN        | 8  | 8p12         | 30890778  | 31031276  | 0.0005 | 0.0104 | 0.6562 | 2  | 11 | 0 |
| RWDD1      | 6  | 6q22.1       | 116892583 | 116914751 | 0.0005 | 0.0103 | 0.6564 | 7  | 2  | 0 |
| PPIH       | 1  | 1p34.2       | 43124048  | 43142428  | 0.0005 | 0.0103 | 0.6565 | 3  | 3  | 0 |
| ATP6V1H    | 8  | 8q11.23      | 54628116  | 54755850  | 0.0005 | 0.0103 | 0.6566 | 11 | 2  | 0 |
| UBAP1      | 9  | 9p13.3       | 34179011  | 34252520  | 0.0005 | 0.0103 | 0.6567 | 4  | 9  | 0 |
| SCYE1      | 4  | 4q24         | 107236767 | 107270377 | 0.0005 | 0.0103 | 0.6567 | 2  | 4  | 0 |
| FANCC      | 9  | 9q22.32      | 97861337  | 98079991  | 0.0005 | 0.0103 | 0.6568 | 2  | 7  | 0 |
| GTTF2A2    | 15 | 15q22.2      | 59930261  | 59949737  | 0.0005 | 0.0103 | 0.6568 | 1  | 6  | 0 |
| NUP93      | 16 | 16q13        | 56764017  | 56879876  | 0.0005 | 0.0102 | 0.6572 | 3  | 9  | 0 |
| TABP1      | 12 | 12p13.31     | 6561177   | 6571484   | 0.0005 | 0.0102 | 0.6573 | 12 | 3  | 0 |
| FASTKD2    | 2  | 2q33.3       | 207630089 | 207660913 | 0.0005 | 0.0102 | 0.6574 | 2  | 4  | 0 |
| C12orf43   | 12 | 12q24.31     | 121440848 | 121454300 | 0.0005 | 0.0101 | 0.6576 | 2  | 6  | 0 |
| ALG5       | 13 | 13q13.3      | 37523912  | 37573504  | 0.0005 | 0.0101 | 0.6576 | 1  | 4  | 0 |
| GHITM      | 10 | 10q23.1      | 85899185  | 85913311  | 0.0005 | 0.0101 | 0.6578 | 2  | 9  | 0 |
| FEN1       | 11 | 11q12.2      | 61560150  | 61564708  | 0.0005 | 0.0101 | 0.6579 | 3  | 3  | 0 |
| SMARCAL1   | 2  | 2q35         | 217277137 | 217347772 | 0.0005 | 0.0101 | 0.6579 | 1  | 6  | 0 |
| RPL35      | 9  | 9q33.3       | 127620158 | 127624240 | 0.0005 | 0.0100 | 0.6582 | 1  | 7  | 0 |
| NUDT1      | 7  | 7p22.3       | 2281857   | 2290780   | 0.0005 | 0.0100 | 0.6582 | 4  | 7  | 0 |
| C6orf153   | 6  | 6p21.1       | 429899373 | 42997334  | 0.0005 | 0.0099 | 0.6587 | 11 | 1  | 0 |
| TMEM33     | 4  | 4p13         | 41937137  | 41962824  | 0.0005 | 0.0099 | 0.6589 | 2  | 11 | 0 |
| MBOAT1     | 6  | 6p22.3       | 20100935  | 20212670  | 0.0005 | 0.0099 | 0.6590 | 8  | 0  | 0 |
| CHMP4C     | 8  | 8q21.13      | 82644688  | 82671750  | 0.0005 | 0.0099 | 0.6590 | 12 | 1  | 2 |
| BTAF1      | 10 | 10q23.32     | 93683736  | 93790078  | 0.0005 | 0.0099 | 0.6592 | 3  | 8  | 0 |
| UBE2R2     | 9  | 9p13.3       | 33817182  | 33920401  | 0.0005 | 0.0098 | 0.6593 | 3  | 9  | 0 |
| CASP6      | 4  | 4q25         | 110609785 | 110624629 | 0.0005 | 0.0098 | 0.6594 | 3  | 3  | 0 |
| ERCC5      | 13 | 13q33.1      | 103498174 | 103528345 | 0.0005 | 0.0098 | 0.6595 | 11 | 3  | 0 |
| KRT10      | 17 | 17q21.2      | 38974370  | 38978863  | 0.0005 | 0.0098 | 0.6595 | 3  | 10 | 0 |
| TRAF3IP1   | 2  | 2q37.3       | 239229177 | 239309537 | 0.0005 | 0.0098 | 0.6595 | 3  | 12 | 0 |
| PPAT       | 4  | 4q12         | 57259531  | 57301845  | 0.0005 | 0.0097 | 0.6599 | 4  | 5  | 0 |
| ALAD       | 9  | 9q32         | 116148595 | 116163618 | 0.0004 | 0.0097 | 0.6600 | 2  | 8  | 0 |
| GPR107     | 9  | 9q34.11      | 132815705 | 132902448 | 0.0004 | 0.0097 | 0.6600 | 3  | 7  | 0 |
| G14orf129  | 14 | 14q32.2      | 96829863  | 96853623  | 0.0004 | 0.0097 | 0.6600 | 3  | 11 | 0 |
| CMAS       | 12 | 12p12.1      | 22199159  | 22218602  | 0.0004 | 0.0097 | 0.6600 | 7  | 4  | 0 |
| EIF2B5     | 3  | 3q27.1       | 183852810 | 184402546 | 0.0004 | 0.0097 | 0.6601 | 12 | 1  | 0 |
| MFF        | 4  | 4q12         | 228189867 | 22822549  | 0.0004 | 0.0097 | 0.6601 | 2  | 8  | 0 |
| POLR2B     | 4  | 4q12         | 57843888  | 57897324  | 0.0004 | 0.0097 | 0.6601 | 4  | 5  | 0 |
| STAT5B     | 17 | 17q21.2      | 40351196  | 40428725  | 0.0004 | 0.0097 | 0.6601 | 1  | 11 | 0 |
| TYK2       | 19 | 19p13.2      | 10461205  | 10489184  | 0.0004 | 0.0097 | 0.6603 | 2  | 4  | 0 |
| RM1        | 9  | 9q21.32      | 86595626  | 86618978  | 0.0004 | 0.0097 | 0.6604 | 4  | 6  | 0 |
| TLCD1      | 17 | 17q11.2      | 27051377  | 27053826  | 0.0004 | 0.0096 | 0.6609 | 1  | 9  | 0 |
| TRIB3      | 20 | 20p13        | 361308    | 378197    | 0.0004 | 0.0096 | 0.6611 | 2  | 6  | 1 |
| ZCRB1      | 12 | 12q12        | 42705888  | 42719932  | 0.0004 | 0.0096 | 0.6612 | 4  | 6  | 0 |
| IMMT       | 2  | 2p11.2       | 86371055  | 86422893  | 0.0004 | 0.0096 | 0.6612 | 4  | 0  | 0 |
| MAP2K4     | 17 | 17p12        | 11924141  | 12047140  | 0.0004 | 0.0095 | 0.6614 | 1  | 16 | 0 |
| GNB2L1     | 5  | 5q35.3       | 180663930 | 180670906 | 0.0004 | 0.0095 | 0.6616 | 5  | 4  | 0 |
| NARG1      | 4  | 4q31.1       | 140222676 | 140312522 | 0.0004 | 0.0095 | 0.6617 | 5  | 4  | 0 |
| TTC8       | 14 | 14q31.3      | 89290978  | 89344334  | 0.0004 | 0.0094 | 0.6619 | 2  | 10 | 0 |
| GPR56      | 16 | 16q21        | 57662419  | 57698944  | 0.0004 | 0.0094 | 0.6620 | 3  | 10 | 0 |
| PIGX       | 3  | 3q29         | 196366646 | 196462855 | 0.0004 | 0.0093 | 0.6624 | 11 | 1  | 0 |
| C19orf72   | 19 | 19p13.12     | 14063304  | 14072254  | 0.0004 | 0.0093 | 0.6624 | 5  | 3  | 0 |
| CCDC93     | 2  | 2q14.1       | 118673147 | 118771709 | 0.0004 | 0.0093 | 0.6624 | 2  | 10 | 0 |
| GORASP2    | 2  | 2q31.1       | 171785707 | 171823636 | 0.0004 | 0.0093 | 0.6624 | 6  | 3  | 0 |
| RALGDS     | 9  | 9q34.2       | 135973107 | 136024588 | 0.0004 | 0.0093 | 0.6628 | 4  | 10 | 1 |
| PPIL1      | 6  | 6p21.2       | 36822608  | 36842800  | 0.0004 | 0.0092 | 0.6629 | 11 | 1  | 0 |
| CHD7       | 8  | 8q12.1-q12.2 | 61591339  | 61779463  | 0.0004 | 0.0092 | 0.6629 | 14 | 1  | 0 |
| TMEM97     | 17 | 17q11.2      | 26646121  | 26655710  | 0.0004 | 0.0092 | 0.6630 | 1  | 9  | 0 |
| ZNF776     | 19 | 19q13.43     | 58258164  | 58269527  | 0.0004 | 0.0092 | 0.6631 | 2  | 6  | 0 |
| AP002373.3 | 11 | 11q23.2      | 114271338 | 114279646 | 0.0004 | 0.0092 | 0.6632 | 5  | 4  | 0 |
| VPS33A     | 12 | 12q24.31     | 122716096 | 122751068 | 0.0004 | 0.0092 | 0.6633 | 2  | 6  | 0 |
| DOPEY2     | 21 | 21q22.12     | 37529080  | 37711195  | 0.0004 | 0.0092 | 0.6634 | 6  | 4  | 0 |
| ZNF137     | 19 | 19q13.41     | 53095291  | 53103405  | 0.0004 | 0.0092 | 0.6636 | 4  | 5  | 0 |
| JMJD2C     | 9  | 9p24.1       | 6757641   | 7175647   | 0.0004 | 0.0091 | 0.6639 | 6  | 9  | 0 |
| RGF1       | 9  | 9p13.3       | 35749203  | 35757908  | 0.0004 | 0.0091 | 0.6640 | 5  | 9  | 0 |
| ITGA3      | 16 | 16p11.2      | 31366509  | 313934318 | 0.0004 | 0.0091 | 0.6640 | 4  | 1  | 0 |
| ZFP82      | 19 | 19q13.12     | 36874593  | 36909558  | 0.0004 | 0.0090 | 0.6642 | 5  |    |   |

Supplementary Table 6  
Page 25

|            |    |  |               |           |           |        |        |        |    |    |   |
|------------|----|--|---------------|-----------|-----------|--------|--------|--------|----|----|---|
| GLO1       | 6  |  | 8p21.2        | 38643704  | 38670952  | 0.0003 | 0.0078 | 0.6728 | 10 | 1  | 0 |
| C9orf30    | 9  |  | 9q31.1        | 103189438 | 103339914 | 0.0003 | 0.0078 | 0.6729 | 2  | 7  | 0 |
| ALG8       | 11 |  | 11q14.1       | 77811988  | 77850699  | 0.0003 | 0.0078 | 0.6730 | 5  | 2  | 0 |
| ATG7       | 3  |  | 3p25.3        | 11313995  | 11599132  | 0.0003 | 0.0078 | 0.6730 | 6  | 2  | 0 |
| CLN8       | 8  |  | 8p23.3        | 1711870   | 1734727   | 0.0003 | 0.0078 | 0.6731 | 2  | 12 | 0 |
| DCLRE1A    | 10 |  | 10q25.3       | 115594484 | 115614142 | 0.0003 | 0.0077 | 0.6733 | 4  | 7  | 0 |
| PFN2       | 3  |  | 3q25.1        | 149682694 | 149688741 | 0.0003 | 0.0077 | 0.6735 | 14 | 1  | 0 |
| GADD45GIP1 | 19 |  | 19p13.2       | 13064972  | 13068050  | 0.0003 | 0.0076 | 0.6741 | 4  | 4  | 0 |
| RYBP       | 3  |  | 3p13          | 72423748  | 72495774  | 0.0003 | 0.0076 | 0.6742 | 3  | 9  | 0 |
| MMS19      | 10 |  | 10q24.1       | 99218081  | 99258513  | 0.0003 | 0.0076 | 0.6743 | 1  | 9  | 0 |
| LIG4       | 13 |  | 13q33.3       | 108859794 | 108870716 | 0.0003 | 0.0076 | 0.6744 | 15 | 2  | 1 |
| MED29      | 19 |  | 19q13.2       | 39881963  | 39891201  | 0.0003 | 0.0076 | 0.6745 | 4  | 6  | 0 |
| CSNK1E     | 22 |  | 22q13.1       | 38686698  | 38794934  | 0.0003 | 0.0075 | 0.6747 | 2  | 6  | 0 |
| UFSP2      | 4  |  | 4q35.1        | 186321443 | 186347068 | 0.0003 | 0.0075 | 0.6747 | 4  | 10 | 0 |
| MKRN2      | 3  |  | 3p25.2        | 12598557  | 12625205  | 0.0003 | 0.0075 | 0.6749 | 5  | 2  | 0 |
| PDSS2      | 6  |  | 6q21          | 107473761 | 107780779 | 0.0003 | 0.0075 | 0.6750 | 8  | 2  | 0 |
| NDUFV2     | 18 |  | 18p11.22      | 9102675   | 9134343   | 0.0003 | 0.0075 | 0.6750 | 6  | 4  | 0 |
| CTDP1      | 18 |  | 18q23         | 77439801  | 77514507  | 0.0003 | 0.0075 | 0.6752 | 6  | 10 | 0 |
| HMG20A     | 15 |  | 15q24.3       | 77713230  | 77777943  | 0.0003 | 0.0075 | 0.6752 | 4  | 6  | 0 |
| C9orf114   | 9  |  | 9q34.11       | 131584346 | 131592085 | 0.0003 | 0.0075 | 0.6753 | 3  | 7  | 0 |
| TCP11L1    | 11 |  | 11p13         | 33060963  | 33106666  | 0.0003 | 0.0075 | 0.6753 | 5  | 3  | 0 |
| NDUFS6     | 5  |  | 5p15.33       | 1801509   | 1816161   | 0.0003 | 0.0074 | 0.6758 | 11 | 4  | 2 |
| URG4       | 7  |  | 7p13          | 43915505  | 43966010  | 0.0003 | 0.0074 | 0.6759 | 1  | 4  | 0 |
| CHRNA5     | 15 |  | 15q25.1       | 78857906  | 78886438  | 0.0003 | 0.0074 | 0.6759 | 5  | 6  | 0 |
| CCDC146    | 7  |  | 7q11.23       | 76751751  | 76924533  | 0.0003 | 0.0073 | 0.6762 | 5  | 1  | 0 |
| PTGER1     | 19 |  | 19p13.12      | 14583279  | 14586174  | 0.0003 | 0.0073 | 0.6764 | 5  | 3  | 2 |
| PPID       | 4  |  | 4q32.1        | 159630280 | 159644552 | 0.0003 | 0.0073 | 0.6765 | 2  | 5  | 1 |
| HEATR5A    | 14 |  | 14q12         | 31760994  | 31889739  | 0.0003 | 0.0073 | 0.6765 | 4  | 4  | 0 |
| CTC2       | 12 |  | 12p15         | 69879208  | 69895357  | 0.0003 | 0.0073 | 0.6766 | 2  | 8  | 0 |
| PTEN       | 10 |  | 10q23.31      | 89623195  | 89728531  | 0.0003 | 0.0073 | 0.6768 | 3  | 8  | 0 |
| DYRK4      | 12 |  | 12p13.32      | 4699486   | 4723030   | 0.0003 | 0.0073 | 0.6768 | 14 | 6  | 0 |
| CDH1       | 16 |  | 16q22.1       | 68771195  | 68869444  | 0.0003 | 0.0073 | 0.6769 | 6  | 7  | 0 |
| KCNAB1     | 3  |  | 3q25.31       | 155838401 | 156256927 | 0.0003 | 0.0073 | 0.6770 | 14 | 0  | 1 |
| PDCL       | 9  |  | 9q33.2        | 125560668 | 125590867 | 0.0003 | 0.0073 | 0.6771 | 1  | 8  | 0 |
| ZRANB1     | 10 |  | 10q26.13      | 126605712 | 126676005 | 0.0003 | 0.0073 | 0.6771 | 5  | 9  | 0 |
| LARP5      | 10 |  | 10p15.3       | 855484    | 977564    | 0.0003 | 0.0073 | 0.6772 | 13 | 0  | 0 |
| TSPAN17    | 5  |  | 5q35.2        | 176074388 | 176086058 | 0.0003 | 0.0073 | 0.6773 | 5  | 7  | 0 |
| CDC6       | 17 |  | 17q21.2       | 38444146  | 38459413  | 0.0003 | 0.0072 | 0.6774 | 2  | 10 | 0 |
| WDR4       | 21 |  | 21q22.3       | 44263206  | 44299678  | 0.0003 | 0.0072 | 0.6775 | 2  | 7  | 0 |
| C1orf123   | 1  |  | 1p32.3        | 53679774  | 53686289  | 0.0003 | 0.0072 | 0.6776 | 7  | 7  | 1 |
| NP         | 14 |  | 14q11.2       | 20937542  | 20945242  | 0.0003 | 0.0072 | 0.6778 | 2  | 4  | 0 |
| NCAPD3     | 11 |  | 11q25         | 134022337 | 134094426 | 0.0003 | 0.0072 | 0.6780 | 3  | 5  | 0 |
| NDUFC2     | 11 |  | 11q14.1       | 77779403  | 77791265  | 0.0003 | 0.0071 | 0.6784 | 5  | 2  | 0 |
| NARS       | 18 |  | 18q21.31      | 55267896  | 55289177  | 0.0003 | 0.0071 | 0.6785 | 2  | 10 | 0 |
| SASH1      | 6  |  | 6q24.3        | 148593440 | 148873184 | 0.0003 | 0.0070 | 0.6789 | 4  | 6  | 0 |
| MFAP3L     | 4  |  | 4q33          | 170907750 | 170948361 | 0.0003 | 0.0069 | 0.6793 | 2  | 6  | 1 |
| ZFYVE9     | 1  |  | 1p32.3        | 52608046  | 52812358  | 0.0003 | 0.0069 | 0.6793 | 7  | 6  | 0 |
| ITM2B      | 13 |  | 13q14.2       | 48807308  | 48836225  | 0.0003 | 0.0069 | 0.6795 | 2  | 7  | 0 |
| SSR1       | 6  |  | 6p24.3        | 7281290   | 7313541   | 0.0003 | 0.0069 | 0.6796 | 9  | 3  | 0 |
| LRRFIP2    | 3  |  | 3p22.2        | 37094117  | 37218023  | 0.0003 | 0.0069 | 0.6796 | 5  | 5  | 0 |
| FAM103A1   | 15 |  | 15q25.2       | 83654971  | 83659791  | 0.0003 | 0.0069 | 0.6798 | 5  | 6  | 0 |
| TOR1A      | 9  |  | 9q34.11       | 132575222 | 132586460 | 0.0003 | 0.0069 | 0.6799 | 3  | 7  | 0 |
| TIGD2      | 4  |  | 4q22.1        | 90033968  | 90036050  | 0.0003 | 0.0069 | 0.6800 | 3  | 4  | 0 |
| MELK       | 9  |  | 9p13.2        | 36572873  | 36677678  | 0.0003 | 0.0069 | 0.6801 | 6  | 9  | 0 |
| VPS4A      | 16 |  | 16q22.1       | 69345279  | 69358951  | 0.0003 | 0.0069 | 0.6801 | 6  | 7  | 0 |
| ATG5       | 6  |  | 6q21          | 106632351 | 106773995 | 0.0003 | 0.0069 | 0.6802 | 8  | 3  | 0 |
| TXNL1      | 18 |  | 18q21.31      | 54270055  | 54305920  | 0.0003 | 0.0069 | 0.6803 | 4  | 11 | 0 |
| LIFT1      | 2  |  | 2q11.2        | 99771718  | 99779811  | 0.0003 | 0.0068 | 0.6803 | 4  | 5  | 1 |
| STX6       | 1  |  | 1q25.3        | 180913178 | 180992046 | 0.0003 | 0.0068 | 0.6804 | 17 | 1  | 0 |
| ASB8       | 12 |  | 12q13.11      | 48541574  | 48551377  | 0.0003 | 0.0068 | 0.6804 | 2  | 9  | 0 |
| CLP1       | 11 |  | 11q12.1       | 57425216  | 57429334  | 0.0003 | 0.0068 | 0.6805 | 6  | 2  | 0 |
| MTFR1      | 8  |  | 8q13.1        | 66556974  | 66622796  | 0.0003 | 0.0068 | 0.6807 | 16 | 1  | 0 |
| RAPGEF2    | 4  |  | 4q32.1        | 160188998 | 160281297 | 0.0003 | 0.0068 | 0.6808 | 2  | 5  | 1 |
| SLC37A1    | 21 |  | 21q22.3       | 43916118  | 44001550  | 0.0002 | 0.0068 | 0.6810 | 5  | 6  | 1 |
| MRPL50     | 9  |  | 9q31.1        | 104152249 | 104160919 | 0.0002 | 0.0068 | 0.6812 | 2  | 7  | 0 |
| CLASP1     | 2  |  | 2q14.2-q14.3  | 122095352 | 122407163 | 0.0002 | 0.0067 | 0.6816 | 2  | 8  | 0 |
| SERINC3    | 20 |  | 20q13.12      | 43124862  | 43150726  | 0.0002 | 0.0067 | 0.6817 | 3  | 9  | 0 |
| THOC7      | 3  |  | 3p14.1        | 63819547  | 63849597  | 0.0002 | 0.0067 | 0.6819 | 2  | 12 | 0 |
| USP53      | 4  |  | 4q26          | 120133791 | 120216672 | 0.0002 | 0.0067 | 0.6822 | 5  | 3  | 0 |
| TM9SF2     | 13 |  | 13q32.3       | 100153671 | 100215634 | 0.0002 | 0.0066 | 0.6823 | 11 | 4  | 1 |
| GAR1       | 4  |  | 4q25          | 110736666 | 110745891 | 0.0002 | 0.0066 | 0.6825 | 3  | 3  | 0 |
| LRP8       | 1  |  | 1p32.3        | 53711212  | 53793821  | 0.0002 | 0.0066 | 0.6825 | 8  | 6  | 1 |
| SPATA2     | 20 |  | 20q13.13      | 48519931  | 48532080  | 0.0002 | 0.0066 | 0.6825 | 7  | 4  | 0 |
| PTPMT1     | 11 |  | 11p11.2       | 47586982  | 47595012  | 0.0002 | 0.0066 | 0.6827 | 1  | 2  | 0 |
| INPP5F     | 10 |  | 10q26.11      | 121485569 | 121588658 | 0.0002 | 0.0066 | 0.6827 | 2  | 7  | 0 |
| TMEM209    | 7  |  | 7q32.2        | 129804555 | 129845338 | 0.0002 | 0.0066 | 0.6829 | 9  | 0  | 0 |
| FRK        | 6  |  | 6q22.1        | 116262696 | 116381921 | 0.0002 | 0.0066 | 0.6829 | 7  | 2  | 0 |
| ZNF259     | 11 |  | 11q23.3       | 116648436 | 116658755 | 0.0002 | 0.0066 | 0.6830 | 5  | 5  | 0 |
| MRP63      | 13 |  | 13q12.11      | 21750372  | 21753203  | 0.0002 | 0.0066 | 0.6830 | 2  | 2  | 0 |
| NCAPG2     | 7  |  | 7q36.3        | 158424003 | 158497520 | 0.0002 | 0.0066 | 0.6830 | 15 | 3  | 0 |
| MYNN       | 3  |  | 3q26.2        | 169490853 | 169505333 | 0.0002 | 0.0066 | 0.6830 | 15 | 0  | 1 |
| ATP11A     | 13 |  | 13q34         | 113344643 | 113541482 | 0.0002 | 0.0066 | 0.6831 | 11 | 2  | 2 |
| NSMAF      | 8  |  | 8q12.1        | 59496070  | 59572404  | 0.0002 | 0.0066 | 0.6834 | 14 | 2  | 0 |
| PDXDC1     | 16 |  | 16p13.11      | 15068833  | 15131550  | 0.0002 | 0.0066 | 0.6834 | 4  | 2  | 0 |
| ACACA      | 17 |  | 17q12         | 35441493  | 35766902  | 0.0002 | 0.0065 | 0.6836 | 3  | 9  | 0 |
| PIM1       | 6  |  | 6p21.2        | 37137322  | 37143302  | 0.0002 | 0.0065 | 0.6838 | 11 | 1  | 0 |
| POP4       | 19 |  | 19q12         | 30097201  | 30106706  | 0.0002 | 0.0065 | 0.6839 | 9  | 3  | 1 |
| C3orf10    | 3  |  | 3p25.3        | 10157333  | 10168871  | 0.0002 | 0.0065 | 0.6840 | 6  | 2  | 0 |
| MARK3      | 14 |  | 14q32.32      | 103851701 | 103970164 | 0.0002 | 0.0065 | 0.6841 | 1  | 8  | 0 |
| GKAP1      | 9  |  | 9q21.32       | 86354336  | 86432752  | 0.0002 | 0.0065 | 0.6843 | 4  | 6  | 0 |
| RUFY1      | 5  |  | 5q35.3        | 178977559 | 179037027 | 0.0002 | 0.0065 | 0.6844 | 5  | 4  | 0 |
| EXOSC2     | 9  |  | 9q34.12       | 133569158 | 133580444 | 0.0002 | 0.0064 | 0.6846 | 3  | 7  | 0 |
| SLC33A1    | 3  |  | 3q25.31       | 155544338 | 155572195 | 0.0002 | 0.0064 | 0.6847 | 13 | 0  | 0 |
| PSMA4      | 15 |  | 15q25.1       | 78832747  | 78841560  | 0.0002 | 0.0064 | 0.6851 | 5  | 6  | 0 |
| ZNF189     | 9  |  | 9q31.1        | 104161163 | 104172942 | 0.0002 | 0.0063 | 0.6853 | 2  | 7  | 0 |
| FARS2      | 6  |  | 6p25.1        | 5261584   | 5771816   | 0.0002 | 0.0063 | 0.6855 | 8  | 3  | 0 |
| LNX2       | 13 |  | 13q12.2       | 28120050  | 28194720  | 0.0002 | 0.0063 | 0.6856 | 0  | 4  | 0 |
| TARS       | 5  |  | 5p13.3        | 33440898  | 33468196  | 0.0002 | 0.0062 | 0.6859 | 9  | 4  | 0 |
| TRIM13     | 13 |  | 13q14.2       | 50570024  | 50592603  | 0.0002 | 0.0062 | 0.6861 | 2  | 6  | 0 |
| TMEM126B   | 11 |  | 11q14.1       | 85339639  | 85347532  | 0.0002 | 0.0062 | 0.6861 | 6  | 3  | 0 |
| ETFA       | 15 |  | 15q24.2-q24.3 | 76508633  | 76603810  | 0.0002 | 0.0062 | 0.6862 | 4  | 5  | 0 |
| MFN1       | 3  |  | 3q26.33       | 179065480 | 179111006 | 0.0002 | 0.0062 | 0.6865 | 16 | 0  | 0 |
| COTL1      | 16 |  | 16q24.1       | 84599237  | 84651702  | 0.0002 | 0.0062 | 0.6866 | 3  | 9  | 0 |
| MKKS       | 20 |  | 20p12.2       | 10385428  | 10414866  | 0.0002 | 0.0061 | 0.6869 | 3  | 7  | 1 |
| NAT10      | 11 |  | 11p13         | 34127111  | 34168457  | 0.0002 | 0.0061 | 0.6869 | 5  | 3  | 0 |
| SBDS       | 7  |  | 7q11.21       | 66452690  | 66460588  | 0.0002 | 0.0061 | 0.6869 | 3  | 4  | 1 |
| MRPL16     | 11 |  | 11q12.1       | 59573612  | 59578345  | 0.0002 | 0.0061 | 0.6870 | 7  | 1  | 0 |
| DDX28      | 16 |  | 16q22.1       | 68055174  | 68057959  | 0.0002 | 0.0061 | 0.6871 | 6  | 8  | 0 |
| SEH1L      | 18 |  | 18p11.21      | 12947983  | 12987533  | 0.0002 | 0.0061 | 0.6873 | 5  | 1  | 0 |
| RAD1       | 5  |  | 5p13.2        | 34905365  | 34918382  | 0.0002 | 0.0061 | 0.6874 | 9  | 4  |   |

Supplementary Table 6  
Page 26

|          |    |                 |           |           |        |        |        |    |    |   |
|----------|----|-----------------|-----------|-----------|--------|--------|--------|----|----|---|
| PSMC1    | 14 | 14q32.11        | 90722894  | 90738966  | 0.0001 | 0.0050 | 0.6987 | 3  | 10 | 0 |
| ATPF51   | 1  | 1p13.2          | 111991743 | 112004521 | 0.0001 | 0.0050 | 0.6990 | 4  | 5  | 0 |
| RNF146   | 6  | 6q22.33         | 127587755 | 127609712 | 0.0001 | 0.0050 | 0.6990 | 11 | 3  | 1 |
| FTSJ3    | 17 | 17q23.3         | 61896795  | 61905031  | 0.0001 | 0.0050 | 0.6990 | 6  | 2  | 0 |
| OXA1L    | 14 | 14q11.2         | 23235731  | 23240998  | 0.0001 | 0.0050 | 0.6991 | 3  | 4  | 0 |
| ZNF529   | 19 | 19q13.12        | 37034518  | 37064197  | 0.0001 | 0.0050 | 0.6991 | 4  | 3  | 0 |
| AEBP2    | 12 | 12p12.3         | 19592608  | 19675173  | 0.0001 | 0.0050 | 0.6993 | 6  | 3  | 0 |
| RCN2     | 15 | 15q24.3         | 77224116  | 77242247  | 0.0001 | 0.0050 | 0.6994 | 4  | 6  | 0 |
| ZNF30    | 19 | 19q13.11        | 35417807  | 35436074  | 0.0001 | 0.0049 | 0.6996 | 4  | 2  | 0 |
| LRFN3    | 19 | 19q13.12        | 36427750  | 36436084  | 0.0001 | 0.0049 | 0.6996 | 5  | 1  | 0 |
| C9orf23  | 9  | 9p13.3          | 34610493  | 34612101  | 0.0001 | 0.0049 | 0.7001 | 5  | 9  | 0 |
| SFRS9    | 12 | 12q24.31        | 120899472 | 120907558 | 0.0001 | 0.0049 | 0.7003 | 2  | 6  | 0 |
| NPTN     | 15 | 15q24.1         | 73852357  | 73925753  | 0.0001 | 0.0049 | 0.7004 | 5  | 6  | 0 |
| SEPT2    | 2  | 2q37.3          | 242254685 | 242293442 | 0.0001 | 0.0048 | 0.7010 | 5  | 7  | 0 |
| PRMT7    | 16 | 16q22.1         | 68344945  | 68391162  | 0.0001 | 0.0048 | 0.7011 | 6  | 8  | 0 |
| COX6C    | 8  | 8q22.2          | 100890372 | 100905895 | 0.0001 | 0.0048 | 0.7012 | 19 | 0  | 2 |
| MAP3K7   | 6  | 6q15            | 91225353  | 91296907  | 0.0001 | 0.0048 | 0.7013 | 8  | 2  | 0 |
| NDUFB9   | 8  | 8q24.13         | 125551343 | 125562226 | 0.0001 | 0.0048 | 0.7014 | 17 | 0  | 1 |
| SEPT10   | 2  | 2q13            | 110300380 | 110371783 | 0.0001 | 0.0047 | 0.7015 | 3  | 7  | 1 |
| PPP1CC   | 12 | 12q24.11        | 111157615 | 111180757 | 0.0001 | 0.0047 | 0.7017 | 2  | 7  | 0 |
| AASDHPPT | 11 | 11q22.3         | 105948285 | 105969419 | 0.0001 | 0.0047 | 0.7019 | 5  | 3  | 0 |
| MED4     | 13 | 13q14.2         | 48650092  | 48669267  | 0.0001 | 0.0047 | 0.7020 | 2  | 7  | 0 |
| VANGL2   | 1  | 1q23.2          | 160370364 | 160398464 | 0.0001 | 0.0047 | 0.7020 | 19 | 0  | 2 |
| ZNF211   | 19 | 19q13.43        | 58141761  | 58154147  | 0.0001 | 0.0047 | 0.7021 | 2  | 6  | 0 |
| SCAMP3   | 1  | 1q22            | 155225773 | 155232195 | 0.0001 | 0.0047 | 0.7024 | 15 | 0  | 0 |
| MRPL44   | 2  | 2q36.1          | 224822121 | 224832429 | 0.0001 | 0.0047 | 0.7024 | 1  | 6  | 0 |
| ZNF551   | 19 | 19q13.43        | 58193357  | 58201167  | 0.0001 | 0.0047 | 0.7025 | 2  | 6  | 0 |
| FAIM12B  | 14 | 14q11.2         | 21236586  | 21239107  | 0.0001 | 0.0047 | 0.7026 | 2  | 4  | 0 |
| IFT74    | 9  | 9p21.2          | 26947037  | 27062923  | 0.0001 | 0.0046 | 0.7032 | 4  | 11 | 0 |
| C1orf66  | 21 | 21q22.11        | 34106213  | 34144169  | 0.0001 | 0.0046 | 0.7032 | 4  | 3  | 5 |
| C1orf6   | 18 | 18q11.2         | 21083462  | 21111746  | 0.0001 | 0.0046 | 0.7037 | 8  | 3  | 1 |
| SMARCE1  | 17 | 17q21.2         | 38783985  | 38804760  | 0.0001 | 0.0046 | 0.7037 | 3  | 10 | 0 |
| C1orf163 | 1  | 1p32.3          | 53152514  | 53164038  | 0.0001 | 0.0046 | 0.7039 | 7  | 6  | 0 |
| PDCDC    | 5  | 5p15.33         | 271736    | 438392    | 0.0001 | 0.0045 | 0.7042 | 9  | 4  | 0 |
| DRGK1    | 20 | 20p13           | 3171021   | 3185331   | 0.0001 | 0.0045 | 0.7042 | 2  | 8  | 0 |
| SYNCRIP  | 6  | 6q14.3          | 86322600  | 86353510  | 0.0001 | 0.0045 | 0.7046 | 8  | 3  | 0 |
| MORC3    | 21 | 21q22.12        | 37692487  | 37748944  | 0.0001 | 0.0044 | 0.7050 | 6  | 4  | 0 |
| RNMT     | 18 | 18p11.21        | 13726660  | 13764557  | 0.0001 | 0.0044 | 0.7050 | 6  | 2  | 0 |
| TAF10    | 11 | 11p15.4         | 6632073   | 6633445   | 0.0001 | 0.0044 | 0.7052 | 2  | 7  | 0 |
| GPBP1    | 5  | 5q11.2          | 56469775  | 56559408  | 0.0001 | 0.0044 | 0.7053 | 0  | 16 | 0 |
| NCOA4    | 10 | 10q11.23        | 51565108  | 51590734  | 0.0001 | 0.0044 | 0.7057 | 3  | 5  | 0 |
| FBXW2    | 9  | 9q33.2          | 123519254 | 123555740 | 0.0001 | 0.0044 | 0.7057 | 3  | 7  | 0 |
| ODC1     | 2  | 2p25.1          | 10580508  | 10588453  | 0.0001 | 0.0044 | 0.7057 | 7  | 3  | 0 |
| BHLHE41  | 12 | 12p12.1         | 26272961  | 26278003  | 0.0001 | 0.0044 | 0.7060 | 8  | 4  | 0 |
| PRPSAP1  | 17 | 17q25.1         | 74306868  | 74380602  | 0.0001 | 0.0044 | 0.7060 | 7  | 3  | 0 |
| YIF1B    | 19 | 19q13.2         | 38795744  | 38806606  | 0.0001 | 0.0043 | 0.7062 | 4  | 6  | 1 |
| JMJD6    | 17 | 17q25.1         | 74708914  | 74722881  | 0.0001 | 0.0043 | 0.7068 | 9  | 4  | 0 |
| C9orf40  | 9  | 9q21.13         | 77561500  | 77567802  | 0.0001 | 0.0043 | 0.7069 | 3  | 6  | 0 |
| SHFM1    | 7  | 7q21.3          | 96251874  | 96339203  | 0.0001 | 0.0043 | 0.7070 | 7  | 0  | 0 |
| AP1M1    | 19 | 19p13.11        | 16308665  | 16346156  | 0.0001 | 0.0043 | 0.7071 | 3  | 2  | 0 |
| FZD7     | 2  | 2q33.1          | 202899310 | 202903160 | 0.0001 | 0.0042 | 0.7076 | 2  | 5  | 0 |
| EIF3M    | 11 | 11p13           | 32605391  | 32624012  | 0.0001 | 0.0042 | 0.7076 | 5  | 3  | 0 |
| MAK10    | 9  | 9q21.33         | 88556057  | 88637203  | 0.0001 | 0.0042 | 0.7077 | 4  | 6  | 0 |
| XPR1     | 1  | 1q25.3          | 180601146 | 180859413 | 0.0001 | 0.0042 | 0.7078 | 17 | 1  | 0 |
| EAPP     | 14 | 14q13.1         | 34985136  | 35008943  | 0.0001 | 0.0042 | 0.7078 | 3  | 4  | 0 |
| C19orf43 | 19 | 19p13.2         | 12841455  | 12845529  | 0.0001 | 0.0042 | 0.7081 | 4  | 4  | 0 |
| ZNF302   | 19 | 19q13.11        | 35168567  | 35177299  | 0.0001 | 0.0042 | 0.7083 | 5  | 2  | 0 |
| POLG     | 15 | 15q26.1         | 89859537  | 89878026  | 0.0001 | 0.0041 | 0.7088 | 7  | 4  | 0 |
| ANKLE2   | 12 | 12q24.33        | 133302255 | 133338451 | 0.0001 | 0.0041 | 0.7089 | 1  | 6  | 0 |
| ZBTB44   | 11 | 11q24.3         | 130096579 | 130184607 | 0.0001 | 0.0041 | 0.7090 | 4  | 6  | 0 |
| FN3KRP   | 17 | 17q25.3         | 80674582  | 80685892  | 0.0001 | 0.0041 | 0.7090 | 9  | 4  | 0 |
| TAF15    | 17 | 17q12           | 34136488  | 34174237  | 0.0001 | 0.0041 | 0.7091 | 3  | 11 | 1 |
| ZW10     | 11 | 11q23.2         | 113603913 | 113644425 | 0.0001 | 0.0041 | 0.7093 | 5  | 4  | 0 |
| ZNF229   | 19 | 19q13.31        | 44930426  | 44952665  | 0.0001 | 0.0041 | 0.7095 | 3  | 7  | 0 |
| GLPC1    | 19 | 19p13.12        | 14588572  | 14606944  | 0.0001 | 0.0041 | 0.7096 | 5  | 3  | 2 |
| C4orf43  | 4  | 4q32.2          | 164415673 | 164441690 | 0.0001 | 0.0041 | 0.7098 | 2  | 5  | 1 |
| NUP133   | 1  | 1q42.13         | 229577044 | 229644088 | 0.0001 | 0.0041 | 0.7098 | 18 | 0  | 1 |
| RDM1     | 17 | 17q12           | 34245070  | 34257780  | 0.0001 | 0.0040 | 0.7103 | 3  | 11 | 1 |
| CAND1    | 12 | 12q14.3-q15     | 67663061  | 67708388  | 0.0001 | 0.0040 | 0.7103 | 5  | 8  | 0 |
| IGF2R    | 6  | 6q25.3          | 160390131 | 160527583 | 0.0001 | 0.0040 | 0.7104 | 2  | 6  | 0 |
| ZNF573   | 19 | 19q13.12-q13.13 | 38229203  | 38307940  | 0.0001 | 0.0040 | 0.7105 | 5  | 5  | 1 |
| POLR1E   | 9  | 9p13.2          | 37485945  | 37506561  | 0.0001 | 0.0040 | 0.7108 | 6  | 9  | 0 |
| PRPF18   | 10 | 10p13           | 13628939  | 13697929  | 0.0001 | 0.0040 | 0.7111 | 12 | 2  | 1 |
| CC2D1A   | 19 | 19p13.12        | 14016956  | 14041693  | 0.0001 | 0.0039 | 0.7112 | 5  | 3  | 0 |
| SPIN1    | 9  | 9q22.1          | 91003297  | 91093623  | 0.0001 | 0.0039 | 0.7113 | 3  | 6  | 0 |
| SERINC1  | 6  | 6q22.31         | 122764496 | 122907269 | 0.0001 | 0.0039 | 0.7116 | 10 | 1  | 1 |
| ZNF641   | 12 | 12q13.11        | 48733911  | 48744554  | 0.0001 | 0.0039 | 0.7117 | 0  | 8  | 0 |
| MARCH6   | 5  | 5p15.2          | 10353828  | 10435491  | 0.0001 | 0.0039 | 0.7117 | 9  | 6  | 1 |
| SRP72    | 4  | 4q12            | 57333762  | 57369846  | 0.0001 | 0.0039 | 0.7117 | 4  | 5  | 0 |
| ATP5S    | 14 | 14q21.3         | 50779047  | 50802276  | 0.0001 | 0.0039 | 0.7118 | 5  | 7  | 0 |
| GTFC3    | 2  | 2q33.1          | 197628672 | 197684449 | 0.0001 | 0.0038 | 0.7127 | 4  | 5  | 0 |
| ODF2     | 9  | 9q34.11         | 131218371 | 131263238 | 0.0001 | 0.0038 | 0.7129 | 3  | 7  | 0 |
| PUS3     | 11 | 11q24.2         | 125763381 | 125773116 | 0.0001 | 0.0038 | 0.7131 | 4  | 5  | 0 |
| RPL7     | 8  | 8q21.11         | 74202519  | 74213303  | 0.0001 | 0.0037 | 0.7137 | 13 | 1  | 0 |
| MRPL52   | 14 | 14q11.2         | 23299082  | 23304239  | 0.0001 | 0.0037 | 0.7138 | 3  | 4  | 0 |
| CDH3     | 16 | 16q22.1         | 68878151  | 68732957  | 0.0001 | 0.0037 | 0.7138 | 6  | 8  | 0 |
| SLC25A6  | 23 | 23p22.33        | 1505045   | 1511626   | 0.0001 | 0.0037 | 0.7140 | 3  | 12 | 0 |
| ATIC     | 2  | 2q35            | 216176679 | 216214487 | 0.0001 | 0.0037 | 0.7144 | 2  | 2  | 0 |
| DERA     | 12 | 12p12.3         | 16084106  | 16190314  | 0.0001 | 0.0037 | 0.7147 | 7  | 4  | 0 |
| CPT2     | 1  | 1p32.3          | 53662101  | 53679867  | 0.0001 | 0.0037 | 0.7147 | 7  | 7  | 1 |
| HIPK3    | 11 | 11p13           | 33279168  | 33375939  | 0.0001 | 0.0037 | 0.7148 | 5  | 2  | 0 |
| BXDC2    | 5  | 5p13.2          | 34915820  | 34925785  | 0.0001 | 0.0037 | 0.7149 | 8  | 4  | 0 |
| ILKAP    | 2  | 2q37.3          | 239079044 | 239112349 | 0.0001 | 0.0037 | 0.7150 | 3  | 11 | 0 |
| PTPRK    | 6  | 6q22.33         | 128289925 | 128841870 | 0.0001 | 0.0037 | 0.7151 | 11 | 3  | 1 |
| LEMD3    | 12 | 12q14.3         | 65563371  | 65642107  | 0.0001 | 0.0036 | 0.7152 | 3  | 8  | 0 |
| CASP8AP2 | 6  | 6q15            | 90539619  | 90581122  | 0.0001 | 0.0036 | 0.7154 | 6  | 2  | 0 |
| HEBP1    | 12 | 12p13.1         | 13127803  | 13153221  | 0.0001 | 0.0036 | 0.7154 | 7  | 5  | 0 |
| SNUPN    | 15 | 15q24.2         | 75890424  | 75918446  | 0.0001 | 0.0036 | 0.7156 | 4  | 5  | 0 |
| PSMC5    | 17 | 17q23.3         | 61904810  | 61909386  | 0.0001 | 0.0036 | 0.7157 | 6  | 2  | 0 |
| MAPK6    | 15 | 15q21.2         | 52311411  | 52358462  | 0.0001 | 0.0036 | 0.7158 | 1  | 6  | 0 |
| ADPRHL1  | 13 | 13q34           | 114076262 | 114107752 | 0.0001 | 0.0035 | 0.7165 | 10 | 2  | 2 |
| RCCD1    | 15 | 15q26.1         | 91498106  | 91506353  | 0.0001 | 0.0035 | 0.7169 | 8  | 3  | 0 |
| UBE3A    | 15 | 15q11.2         | 25582396  | 25684128  | 0.0001 | 0.0035 | 0.7172 | 1  | 7  | 0 |
| TULP4    | 6  | 6q25.3          | 158733692 | 158932854 | 0.0001 | 0.0035 | 0.7173 | 3  | 6  | 0 |
| DHTKD1   | 10 | 10p14           | 12110934  | 12165223  | 0.0001 | 0.0035 | 0.7173 | 11 | 2  | 1 |
| ZNF706   | 8  | 8q22.3          | 102209268 | 102217960 | 0.0001 | 0.0035 | 0.7174 | 19 | 0  | 2 |
| SHQ1     | 3  | 3p13            | 72798432  | 72897599  | 0.0001 | 0.0034 | 0.7184 | 2  | 8  | 0 |
| DNAJC15  | 13 | 13q14.11        | 43597362  | 43683304  | 0.0001 | 0.0034 | 0.7184 | 2  | 7  | 0 |
| RFX3     | 9  | 9p24.2          | 3224649   | 3526004   | 0.0001 | 0.0034 | 0.7185 | 6  | 10 | 0 |
| XRCC1    | 19 | 19q13.31        | 44047464  | 44079730  | 0.0001 | 0.0034 | 0.7186 | 4  | 7  | 0 |
| NSFL1C   | 20 | 20p13           | 1422811   | 1448417   | 0.0001 | 0.0034 | 0.7186 | 6  | 7  | 1 |
| SMARCA5  | 4  | 4q31.21         | 144434616 | 144474566 | 0.0001 | 0.0034 | 0.7187 | 4  | 6  | 0 |
| FAM8A1   | 6  | 6q22.3          | 17600518  | 17611948  | 0.0001 | 0.0033 | 0.7185 | 10 | 0  | 0 |
| FKBP15   | 9  | 9q32            | 11592326  | 115983641 | 0.0001 | 0.0033 | 0.71   |    |    |   |

Supplementary Table 6  
Page 27

|            |    |  |                 |           |           |        |        |        |    |    |   |
|------------|----|--|-----------------|-----------|-----------|--------|--------|--------|----|----|---|
| SARS       | 1  |  | 1p13.3          | 109756540 | 109780785 | 0.0000 | 0.0022 | 0.7381 | 4  | 4  | 0 |
| SCOC       | 4  |  | 4q31.1          | 141178440 | 141303708 | 0.0000 | 0.0022 | 0.7383 | 5  | 6  | 0 |
| WHAMM      | 15 |  | 15q25.2         | 83477793  | 83503613  | 0.0000 | 0.0022 | 0.7383 | 5  | 6  | 0 |
| ACADSB     | 10 |  | 10q26.13        | 124768429 | 124817806 | 0.0000 | 0.0022 | 0.7384 | 5  | 9  | 2 |
| STOML2     | 9  |  | 9p13.3          | 35099891  | 35103154  | 0.0000 | 0.0021 | 0.7391 | 5  | 9  | 0 |
| INTS4      | 11 |  | 11q14.1         | 77589768  | 77705717  | 0.0000 | 0.0021 | 0.7395 | 5  | 2  | 0 |
| KIAA0100   | 17 |  | 17q11.2         | 26941459  | 26972173  | 0.0000 | 0.0021 | 0.7400 | 1  | 9  | 0 |
| RAF1       | 3  |  | 3p25.2          | 12625102  | 12705700  | 0.0000 | 0.0021 | 0.7401 | 5  | 2  | 0 |
| ZNF354A    | 5  |  | 5q35.3          | 178138531 | 178157703 | 0.0000 | 0.0021 | 0.7402 | 5  | 4  | 0 |
| ADAR       | 1  |  | 1q21.3          | 154554538 | 154600474 | 0.0000 | 0.0021 | 0.7403 | 18 | 0  | 1 |
| PGRMC2     | 4  |  | 4q28.2          | 129190397 | 129209984 | 0.0000 | 0.0021 | 0.7404 | 5  | 2  | 0 |
| SEC14L1    | 17 |  | 17q25.2         | 75137005  | 75213183  | 0.0000 | 0.0020 | 0.7416 | 9  | 4  | 0 |
| MRPL3      | 3  |  | 3q22.1          | 131181046 | 131221829 | 0.0000 | 0.0020 | 0.7418 | 7  | 0  | 0 |
| RPS12      | 6  |  | 6q23.2          | 133135681 | 133138703 | 0.0000 | 0.0020 | 0.7420 | 8  | 3  | 1 |
| FBXO22     | 15 |  | 15q24.2         | 76196200  | 76226944  | 0.0000 | 0.0020 | 0.7422 | 4  | 5  | 0 |
| FAM82B     | 8  |  | 8q21.3          | 87484578  | 87521009  | 0.0000 | 0.0020 | 0.7423 | 11 | 1  | 1 |
| UNG        | 12 |  | 12q24.11        | 109535415 | 109548798 | 0.0000 | 0.0020 | 0.7426 | 4  | 8  | 0 |
| PRCC       | 1  |  | 1q23.1          | 156737274 | 156770602 | 0.0000 | 0.0020 | 0.7429 | 16 | 0  | 1 |
| APIP       | 11 |  | 11p13           | 34903845  | 34937939  | 0.0000 | 0.0020 | 0.7430 | 5  | 2  | 0 |
| GAB1       | 4  |  | 4q31.21         | 144257983 | 144395717 | 0.0000 | 0.0019 | 0.7432 | 4  | 6  | 0 |
| FKBP3      | 14 |  | 14q21.2         | 45584803  | 45604522  | 0.0000 | 0.0019 | 0.7436 | 3  | 5  | 0 |
| TIMM44     | 19 |  | 19p13.2         | 7991604   | 8008538   | 0.0000 | 0.0019 | 0.7440 | 1  | 5  | 0 |
| PCK2       | 14 |  | 14q11.2         | 24563483  | 24573339  | 0.0000 | 0.0019 | 0.7442 | 3  | 4  | 0 |
| PSMD5      | 9  |  | 9q33.2          | 123577774 | 123605206 | 0.0000 | 0.0019 | 0.7444 | 3  | 7  | 0 |
| METAP1     | 4  |  | 4q23            | 99916788  | 99983959  | 0.0000 | 0.0019 | 0.7444 | 3  | 4  | 0 |
| UBE4A      | 11 |  | 11q23.3         | 118230302 | 118269922 | 0.0000 | 0.0019 | 0.7445 | 6  | 4  | 0 |
| C10orf47   | 10 |  | 10p14           | 11865397  | 11914274  | 0.0000 | 0.0019 | 0.7445 | 11 | 2  | 1 |
| TGFBRAF1   | 2  |  | 2q12.1          | 105880871 | 105946491 | 0.0000 | 0.0019 | 0.7446 | 5  | 6  | 1 |
| RPL39L     | 3  |  | 3q27.3          | 186883676 | 18688996  | 0.0000 | 0.0019 | 0.7446 | 11 | 2  | 0 |
| U2AF1L4    | 19 |  | 19q13.12        | 36233430  | 36236336  | 0.0000 | 0.0019 | 0.7447 | 5  | 1  | 0 |
| UDUF85     | 3  |  | 3q26.33         | 179322575 | 179342287 | 0.0000 | 0.0019 | 0.7453 | 16 | 0  | 0 |
| ISG20L2    | 1  |  | 1q23.1          | 156692395 | 156698591 | 0.0000 | 0.0019 | 0.7455 | 16 | 0  | 1 |
| LIG1       | 19 |  | 19q13.33        | 48618703  | 48673560  | 0.0000 | 0.0019 | 0.7456 | 3  | 9  | 0 |
| ZFX        | 23 |  | 23p22.11        | 24167746  | 24234206  | 0.0000 | 0.0019 | 0.7457 | 3  | 11 | 0 |
| AP2M1      | 3  |  | 3q27.1          | 183892634 | 183901878 | 0.0000 | 0.0019 | 0.7458 | 12 | 1  | 1 |
| CDC123     | 10 |  | 10p13           | 12237961  | 12292588  | 0.0000 | 0.0018 | 0.7460 | 12 | 2  | 1 |
| C19orf57   | 19 |  | 19p13.13-p13.12 | 13993168  | 14016909  | 0.0000 | 0.0018 | 0.7468 | 5  | 3  | 0 |
| EFTUD2     | 17 |  | 17q21.31        | 42927655  | 42976993  | 0.0000 | 0.0018 | 0.7473 | 2  | 11 | 0 |
| RPL31      | 2  |  | 2q11.2          | 101618691 | 101640494 | 0.0000 | 0.0017 | 0.7487 | 4  | 5  | 1 |
| DNAJB1     | 19 |  | 19p13.12        | 14625582  | 14629201  | 0.0000 | 0.0017 | 0.7493 | 5  | 3  | 2 |
| LLPH       | 12 |  | 12q14.3         | 66516842  | 66524533  | 0.0000 | 0.0017 | 0.7493 | 3  | 8  | 0 |
| C13orf16   | 13 |  | 13q34           | 111973015 | 111996594 | 0.0000 | 0.0017 | 0.7497 | 13 | 2  | 2 |
| ADIPOR1    | 1  |  | 1q32.1          | 202909963 | 202927700 | 0.0000 | 0.0017 | 0.7497 | 14 | 1  | 0 |
| ZNF212     | 7  |  | 7q36.1          | 148936742 | 148952686 | 0.0000 | 0.0017 | 0.7498 | 10 | 1  | 0 |
| FBXO33     | 14 |  | 14q21.1         | 39866877  | 39901704  | 0.0000 | 0.0016 | 0.7500 | 2  | 6  | 0 |
| NHP2L1     | 22 |  | 22q13.2         | 42069940  | 42086508  | 0.0000 | 0.0016 | 0.7502 | 2  | 6  | 0 |
| VEPH1      | 3  |  | 3q25.31-q25.32  | 156977534 | 157221136 | 0.0000 | 0.0016 | 0.7504 | 13 | 0  | 1 |
| MRPL46     | 15 |  | 15q25.3         | 89002709  | 89010633  | 0.0000 | 0.0016 | 0.7505 | 7  | 4  | 0 |
| DCUN1D2    | 13 |  | 13q34           | 114110134 | 114145023 | 0.0000 | 0.0016 | 0.7506 | 10 | 2  | 2 |
| PAXIP1     | 7  |  | 7q36.2          | 154735397 | 154794794 | 0.0000 | 0.0016 | 0.7506 | 14 | 2  | 0 |
| MRPL45     | 17 |  | 17q12           | 36452998  | 36479100  | 0.0000 | 0.0016 | 0.7510 | 3  | 11 | 0 |
| XRCC5      | 2  |  | 2q35            | 216972187 | 217071026 | 0.0000 | 0.0016 | 0.7511 | 1  | 6  | 0 |
| ACTR10     | 14 |  | 14q23.1         | 58666833  | 58702351  | 0.0000 | 0.0016 | 0.7512 | 2  | 9  | 0 |
| GTPBP4     | 10 |  | 10p15.3         | 1034349   | 1063688   | 0.0000 | 0.0016 | 0.7513 | 13 | 0  | 0 |
| UTP18      | 17 |  | 17q21.33        | 49337897  | 49375290  | 0.0000 | 0.0016 | 0.7514 | 3  | 6  | 0 |
| DBR1       | 3  |  | 3q22.3          | 137879857 | 137893773 | 0.0000 | 0.0016 | 0.7515 | 9  | 0  | 0 |
| PPPS5      | 19 |  | 19q13.32        | 46865024  | 46864109  | 0.0000 | 0.0016 | 0.7519 | 3  | 9  | 0 |
| SFT2D1     | 6  |  | 6q27            | 166733224 | 166756028 | 0.0000 | 0.0016 | 0.7523 | 3  | 7  | 0 |
| LTV1       | 6  |  | 6q24.2          | 144164487 | 144184928 | 0.0000 | 0.0015 | 0.7529 | 7  | 4  | 1 |
| NCK2       | 2  |  | 2q12.2          | 106361354 | 106510705 | 0.0000 | 0.0015 | 0.7530 | 5  | 6  | 1 |
| SEMA4C     | 2  |  | 2q11.2          | 97525474  | 97536494  | 0.0000 | 0.0015 | 0.7532 | 7  | 3  | 1 |
| LYRM1      | 16 |  | 16p12.3         | 20911557  | 20936328  | 0.0000 | 0.0015 | 0.7534 | 1  | 4  | 0 |
| ZNF71      | 19 |  | 19q13.43        | 57106664  | 57135540  | 0.0000 | 0.0015 | 0.7535 | 3  | 5  | 0 |
| PSMB5      | 14 |  | 14q11.2         | 23495060  | 23504429  | 0.0000 | 0.0015 | 0.7537 | 3  | 4  | 0 |
| SNRPF      | 12 |  | 12q23.1         | 96252709  | 96260233  | 0.0000 | 0.0015 | 0.7538 | 1  | 5  | 0 |
| PSMB3      | 17 |  | 17q12           | 36909002  | 36920477  | 0.0000 | 0.0015 | 0.7540 | 3  | 9  | 0 |
| ZNF318     | 6  |  | 6p21.1          | 43299513  | 43337181  | 0.0000 | 0.0015 | 0.7540 | 12 | 1  | 0 |
| SLCO1A2    | 12 |  | 12p12.1         | 21417535  | 21572518  | 0.0000 | 0.0015 | 0.7541 | 7  | 4  | 0 |
| FBXO18     | 10 |  | 10p15.1         | 5932194   | 5979556   | 0.0000 | 0.0015 | 0.7542 | 15 | 0  | 1 |
| TNKS2      | 10 |  | 10q23.32        | 93558151  | 93625232  | 0.0000 | 0.0015 | 0.7545 | 3  | 9  | 0 |
| HEATR6     | 17 |  | 17q23.1         | 58120562  | 58156292  | 0.0000 | 0.0015 | 0.7548 | 5  | 4  | 0 |
| TDRD7      | 9  |  | 9q22.33         | 100174302 | 100258401 | 0.0000 | 0.0015 | 0.7551 | 3  | 8  | 0 |
| PTDSS1     | 8  |  | 8q22.1          | 97274164  | 97346774  | 0.0000 | 0.0015 | 0.7551 | 18 | 0  | 2 |
| ZNF416     | 19 |  | 19q13.43        | 58082935  | 58090243  | 0.0000 | 0.0015 | 0.7552 | 2  | 6  | 0 |
| MRPS6      | 21 |  | 21q22.11        | 35445823  | 35732332  | 0.0000 | 0.0015 | 0.7555 | 4  | 6  | 0 |
| TINF2      | 14 |  | 14q12           | 24708853  | 24711880  | 0.0000 | 0.0015 | 0.7556 | 3  | 4  | 0 |
| FAM175B    | 10 |  | 10q26.13        | 126490354 | 126525238 | 0.0000 | 0.0015 | 0.7559 | 5  | 8  | 0 |
| ALDH18A1   | 10 |  | 10q24.1         | 97365687  | 97416567  | 0.0000 | 0.0014 | 0.7566 | 2  | 10 | 0 |
| WARS2      | 1  |  | 1p12            | 119573839 | 119683295 | 0.0000 | 0.0014 | 0.7569 | 7  | 4  | 1 |
| GATAD2A    | 19 |  | 19p13.11        | 19496639  | 19619740  | 0.0000 | 0.0014 | 0.7571 | 4  | 3  | 0 |
| WDR61      | 15 |  | 15q25.1         | 78575580  | 78591940  | 0.0000 | 0.0014 | 0.7572 | 5  | 6  | 0 |
| AD000671.3 | 19 |  | 19q13.12        | 36208921  | 36229779  | 0.0000 | 0.0014 | 0.7577 | 5  | 1  | 0 |
| ZNF592     | 15 |  | 15q25.3         | 85325885  | 85349659  | 0.0000 | 0.0013 | 0.7592 | 5  | 6  | 0 |
| NUP85      | 17 |  | 17q25.1         | 73201597  | 73231854  | 0.0000 | 0.0013 | 0.7601 | 6  | 3  | 0 |
| AFDC1      | 10 |  | 10q23.31        | 89512874  | 89577917  | 0.0000 | 0.0013 | 0.7602 | 3  | 6  | 0 |
| CHERP      | 19 |  | 19p13.11        | 16628700  | 16653263  | 0.0000 | 0.0013 | 0.7608 | 3  | 2  | 0 |
| TTC17      | 11 |  | 11p12-p11.2     | 43380491  | 43515493  | 0.0000 | 0.0013 | 0.7610 | 5  | 3  | 0 |
| CLTC       | 17 |  | 17q23.1         | 57697050  | 57774317  | 0.0000 | 0.0013 | 0.7611 | 5  | 4  | 0 |
| ING4       | 12 |  | 12p13.31        | 6759705   | 6772308   | 0.0000 | 0.0013 | 0.7612 | 12 | 3  | 0 |
| UPF2       | 10 |  | 10p14           | 11962021  | 12085023  | 0.0000 | 0.0013 | 0.7616 | 11 | 2  | 1 |
| TSHZ1      | 18 |  | 18q22.3         | 72922731  | 73001898  | 0.0000 | 0.0013 | 0.7619 | 5  | 9  | 0 |
| ZNF514     | 2  |  | 2q11.1          | 95813400  | 95831158  | 0.0000 | 0.0012 | 0.7625 | 6  | 3  | 1 |
| FYTTD1     | 3  |  | 3q29            | 197464050 | 197511184 | 0.0000 | 0.0012 | 0.7625 | 11 | 2  | 0 |
| BIRC5      | 17 |  | 17q25.3         | 76210277  | 76221715  | 0.0000 | 0.0012 | 0.7627 | 10 | 4  | 0 |
| PSMD2      | 3  |  | 3q27.1          | 184016986 | 184026840 | 0.0000 | 0.0012 | 0.7632 | 12 | 1  | 0 |
| FXN        | 9  |  | 9q21.11         | 71650344  | 71688937  | 0.0000 | 0.0012 | 0.7636 | 5  | 5  | 0 |
| DHX32      | 10 |  | 10q26.2         | 127524906 | 127585005 | 0.0000 | 0.0012 | 0.7639 | 4  | 9  | 0 |
| IER2       | 19 |  | 19p13.2         | 13261282  | 13265716  | 0.0000 | 0.0012 | 0.7641 | 5  | 4  | 1 |
| CKS2       | 9  |  | 9q22.2          | 91926113  | 91931617  | 0.0000 | 0.0012 | 0.7643 | 4  | 7  | 0 |
| SEC23B     | 20 |  | 20p11.23        | 18488137  | 18542059  | 0.0000 | 0.0012 | 0.7646 | 4  | 6  | 0 |
| YARS       | 1  |  | 1p35.1          | 33240840  | 33283633  | 0.0000 | 0.0012 | 0.7650 | 2  | 8  | 0 |
| AKAP8      | 19 |  | 19p13.12        | 15464341  | 15490603  | 0.0000 | 0.0012 | 0.7651 | 4  | 2  | 1 |
| PHGDHL1    | 13 |  | 13q32.3         | 99852679  | 100038751 | 0.0000 | 0.0011 | 0.7654 | 11 | 4  | 1 |
| MRPL18     | 6  |  | 6q25.3          | 160211492 | 160219460 | 0.0000 | 0.0011 | 0.7655 | 2  | 6  | 0 |
| ALG6       | 1  |  | 1p31.3          | 63833261  | 63904233  | 0.0000 | 0.0011 | 0.7656 | 7  | 2  | 0 |
| ABCF8      | 3  |  | 3q27.1          | 183903863 | 183911795 | 0.0000 | 0.0011 | 0.7656 | 12 | 1  | 1 |
| NDUFA8     | 9  |  | 9q33.2          | 124906340 | 124922098 | 0.0000 | 0.0011 | 0.7659 | 2  | 8  | 0 |
| ARHGAP12   | 10 |  | 10p11.22        | 32094365  | 32217770  | 0.0000 | 0.0011 | 0.7664 | 11 | 1  | 0 |
| USP6NL     | 10 |  | 10p14           | 11502509  | 11653753  | 0.0000 | 0.0011 | 0.7664 | 13 | 1  | 2 |
| MCM3AP     | 21 |  | 21q22.3         |           |           |        |        |        |    |    |   |

Supplementary Table 6  
Page 28

|           |    |               |           |           |        |        |        |    |    |   |
|-----------|----|---------------|-----------|-----------|--------|--------|--------|----|----|---|
| IRS2      | 13 | 13q34         | 110406186 | 110438914 | 0.0000 | 0.0004 | 0.8000 | 13 | 2  | 2 |
| CUL4A     | 13 | 13q34         | 113863086 | 113919398 | 0.0000 | 0.0004 | 0.8005 | 10 | 2  | 2 |
| KLHL12    | 1  | 1q32.1        | 202860230 | 202897764 | 0.0000 | 0.0004 | 0.8018 | 14 | 1  | 0 |
| DNAJA5    | 5  | 5p13.2        | 34829698  | 34959068  | 0.0000 | 0.0004 | 0.8018 | 8  | 4  | 0 |
| CDYL      | 6  | 6p25.1        | 4706393   | 4955775   | 0.0000 | 0.0004 | 0.8019 | 8  | 3  | 0 |
| PEX12     | 17 | 17q12         | 33897849  | 33905656  | 0.0000 | 0.0004 | 0.8020 | 3  | 11 | 1 |
| ARL8B     | 3  | 3p26.1        | 5163930   | 5222597   | 0.0000 | 0.0004 | 0.8026 | 6  | 6  | 1 |
| ICT1      | 17 | 17q25.1       | 73008776  | 73017355  | 0.0000 | 0.0004 | 0.8027 | 6  | 3  | 0 |
| C14orf153 | 14 | 14q32.33      | 104029299 | 104167887 | 0.0000 | 0.0004 | 0.8031 | 1  | 8  | 0 |
| RPP38     | 10 | 10p13         | 15139179  | 15181817  | 0.0000 | 0.0004 | 0.8033 | 9  | 2  | 1 |
| UPF3A     | 13 | 13q34         | 115047078 | 115071261 | 0.0000 | 0.0004 | 0.8036 | 11 | 2  | 2 |
| RPS13P2   | 11 | 11p15.1       | 17095939  | 17099220  | 0.0000 | 0.0004 | 0.8039 | 6  | 4  | 0 |
| PEX3      | 6  | 6q24.2        | 143771918 | 143812504 | 0.0000 | 0.0004 | 0.8040 | 7  | 5  | 1 |
| NOP2      | 12 | 12p13.31      | 6666029   | 6677480   | 0.0000 | 0.0004 | 0.8048 | 12 | 3  | 0 |
| PWP1      | 12 | 12q23.3       | 108079590 | 108106257 | 0.0000 | 0.0003 | 0.8057 | 2  | 10 | 0 |
| CSTF1     | 20 | 20q13.2       | 54967427  | 54979582  | 0.0000 | 0.0003 | 0.8062 | 4  | 7  | 0 |
| CAB39     | 2  | 2q37.1        | 231577557 | 231685789 | 0.0000 | 0.0003 | 0.8066 | 2  | 7  | 0 |
| BRD4      | 19 | 19p13.12      | 15348301  | 15391262  | 0.0000 | 0.0003 | 0.8068 | 4  | 2  | 2 |
| UMPS      | 3  | 3q21.2        | 124449213 | 124464040 | 0.0000 | 0.0003 | 0.8072 | 7  | 3  | 0 |
| WDR11     | 10 | 10q26.12      | 122610695 | 122669036 | 0.0000 | 0.0003 | 0.8091 | 3  | 8  | 1 |
| TBRG4     | 7  | 7p13          | 45139700  | 45151317  | 0.0000 | 0.0003 | 0.8093 | 3  | 6  | 0 |
| CCDC44    | 17 | 17q23.3       | 61678243  | 61685724  | 0.0000 | 0.0003 | 0.8094 | 6  | 3  | 0 |
| TUBGCP3   | 13 | 13q34         | 113139326 | 113242481 | 0.0000 | 0.0003 | 0.8101 | 12 | 2  | 2 |
| MRPL32    | 7  | 7p14.1        | 42971939  | 42977456  | 0.0000 | 0.0003 | 0.8104 | 3  | 9  | 0 |
| NCBP1     | 9  | 9q22.33       | 100395705 | 100436030 | 0.0000 | 0.0003 | 0.8109 | 3  | 8  | 0 |
| SEC61G    | 7  | 7p11.2        | 54819944  | 54827667  | 0.0000 | 0.0003 | 0.8114 | 2  | 4  | 0 |
| FBXO30    | 6  | 6q24.3        | 146119276 | 146135921 | 0.0000 | 0.0003 | 0.8118 | 6  | 6  | 1 |
| NUDT5     | 10 | 10p13         | 12208723  | 12238143  | 0.0000 | 0.0003 | 0.8119 | 11 | 2  | 1 |
| ZFYVE27   | 10 | 10q24.2       | 99496880  | 99520652  | 0.0000 | 0.0003 | 0.8134 | 1  | 9  | 1 |
| CCDC138   | 2  | 2q12.3        | 109403217 | 109493032 | 0.0000 | 0.0003 | 0.8142 | 5  | 6  | 1 |
| SNRFB2    | 20 | 20p12.1       | 16710629  | 16722390  | 0.0000 | 0.0003 | 0.8147 | 4  | 7  | 0 |
| SEC61B    | 9  | 9q22.33       | 101984559 | 101982894 | 0.0000 | 0.0003 | 0.8155 | 3  | 9  | 1 |
| NDUFS4    | 5  | 5q11.2        | 52856465  | 52979171  | 0.0000 | 0.0003 | 0.8156 | 0  | 12 | 0 |
| PANK2     | 20 | 20p13         | 3869486   | 3904502   | 0.0000 | 0.0002 | 0.8179 | 2  | 8  | 0 |
| IPO5      | 13 | 13q32.2       | 98605929  | 98676551  | 0.0000 | 0.0002 | 0.8180 | 10 | 4  | 1 |
| STAT1P1   | 18 | 18q12.2       | 33709884  | 33754618  | 0.0000 | 0.0002 | 0.8185 | 7  | 9  | 0 |
| C7orf64   | 7  | 7q21.2        | 92158087  | 92166822  | 0.0000 | 0.0002 | 0.8196 | 9  | 0  | 1 |
| FGFR2     | 10 | 10q26.13      | 123237848 | 123357972 | 0.0000 | 0.0002 | 0.8202 | 3  | 8  | 2 |
| C18orf21  | 18 | 18q12.2       | 33552588  | 33559241  | 0.0000 | 0.0002 | 0.8204 | 7  | 9  | 0 |
| MORF4L1   | 15 | 15q25.1       | 79132903  | 79190072  | 0.0000 | 0.0002 | 0.8209 | 5  | 6  | 0 |
| GATAD1    | 7  | 7q21.2        | 92076765  | 92120924  | 0.0000 | 0.0002 | 0.8236 | 9  | 0  | 1 |
| CLNS1A    | 11 | 11q14.1       | 77327197  | 77348851  | 0.0000 | 0.0002 | 0.8246 | 4  | 2  | 0 |
| TYW1      | 7  | 7q11.21       | 66461807  | 66704499  | 0.0000 | 0.0002 | 0.8253 | 3  | 4  | 1 |
| NSUN6     | 10 | 10p12.31      | 18802044  | 18948196  | 0.0000 | 0.0002 | 0.8266 | 11 | 1  | 0 |
| PARL      | 3  | 3q27.1        | 183547176 | 183602696 | 0.0000 | 0.0001 | 0.8305 | 11 | 1  | 1 |
| CCDC90B   | 11 | 11q14.1       | 82972504  | 82997377  | 0.0000 | 0.0001 | 0.8314 | 7  | 3  | 0 |
| ANAPC1    | 2  | 2q13          | 112523848 | 112641741 | 0.0000 | 0.0001 | 0.8324 | 3  | 7  | 0 |
| PIK3C3    | 18 | 18q12.3       | 39535199  | 39661444  | 0.0000 | 0.0001 | 0.8331 | 4  | 9  | 0 |
| RANBP2    | 2  | 2q12.3        | 109335902 | 109402267 | 0.0000 | 0.0001 | 0.8341 | 5  | 6  | 1 |
| METTL10   | 10 | 10q26.13      | 126447406 | 126480439 | 0.0000 | 0.0001 | 0.8344 | 5  | 8  | 1 |
| DAD1      | 14 | 14q11.2       | 23033807  | 23058143  | 0.0000 | 0.0001 | 0.8357 | 3  | 4  | 0 |
| BUB3      | 10 | 10q26.13      | 124913760 | 124924886 | 0.0000 | 0.0001 | 0.8369 | 5  | 9  | 2 |
| PSMD8     | 19 | 19q13.2       | 38865190  | 38874463  | 0.0000 | 0.0001 | 0.8370 | 4  | 6  | 1 |
| TEX10     | 9  | 9q31.1        | 103064372 | 103115174 | 0.0000 | 0.0001 | 0.8375 | 2  | 7  | 0 |
| CCDC49    | 17 | 17q12         | 36957447  | 36981589  | 0.0000 | 0.0001 | 0.8376 | 3  | 9  | 0 |
| MCCC1     | 3  | 3q27.1        | 182733008 | 182817365 | 0.0000 | 0.0001 | 0.8389 | 12 | 1  | 1 |
| PPP4R2    | 3  | 3p13          | 73045391  | 73116290  | 0.0000 | 0.0001 | 0.8391 | 2  | 6  | 0 |
| MAPKAPK2  | 1  | 1q32.1        | 206858289 | 206907626 | 0.0000 | 0.0001 | 0.8401 | 16 | 1  | 0 |
| CDK6RAP2  | 9  | 9q33.2        | 123151147 | 123342437 | 0.0000 | 0.0001 | 0.8410 | 2  | 9  | 0 |
| NDUFB7    | 19 | 19p13.12      | 14676892  | 14682886  | 0.0000 | 0.0001 | 0.8426 | 5  | 3  | 2 |
| LSG1      | 3  | 3q29          | 194361518 | 194393206 | 0.0000 | 0.0001 | 0.8427 | 12 | 2  | 0 |
| GTF2F2    | 8  | 8p12          | 30436035  | 30515738  | 0.0000 | 0.0001 | 0.8435 | 2  | 12 | 0 |
| REPS1     | 6  | 6q24.1        | 139225620 | 139309398 | 0.0000 | 0.0001 | 0.8444 | 7  | 3  | 1 |
| ABHD13    | 13 | 13q33.3       | 108870763 | 108886602 | 0.0000 | 0.0001 | 0.8449 | 15 | 2  | 1 |
| DNAJB11   | 3  | 3q27.3        | 186285192 | 186314892 | 0.0000 | 0.0001 | 0.8472 | 11 | 1  | 0 |
| FARP1     | 13 | 13q32.2       | 98795434  | 99102016  | 0.0000 | 0.0001 | 0.8472 | 10 | 4  | 1 |
| CNNM4     | 2  | 2q11.2        | 97426639  | 97477624  | 0.0000 | 0.0001 | 0.8489 | 7  | 3  | 1 |
| STX10     | 19 | 19p13.2       | 13254903  | 13261052  | 0.0000 | 0.0001 | 0.8499 | 5  | 4  | 1 |
| TACC2     | 10 | 10q26.13      | 123748709 | 124014059 | 0.0000 | 0.0001 | 0.8513 | 4  | 9  | 2 |
| PAK1      | 11 | 11q13.5-q14.1 | 77033061  | 77185108  | 0.0000 | 0.0001 | 0.8519 | 4  | 2  | 0 |
| DDX39     | 19 | 19p13.12      | 14519633  | 14530171  | 0.0000 | 0.0000 | 0.8580 | 5  | 3  | 2 |
| C12orf30  | 12 | 12q24.13      | 112464494 | 112546597 | 0.0000 | 0.0000 | 0.8589 | 2  | 7  | 0 |
| RFC4      | 3  | 3q27.3        | 186507669 | 186524847 | 0.0000 | 0.0000 | 0.8594 | 11 | 1  | 0 |
| MRPL51    | 12 | 12p13.31      | 6601318   | 6602471   | 0.0000 | 0.0000 | 0.8602 | 12 | 3  | 0 |
| DDX56     | 7  | 7p13          | 44605403  | 44614650  | 0.0000 | 0.0000 | 0.8612 | 1  | 6  | 0 |
| ARID5A    | 2  | 2q11.2        | 97202464  | 97218371  | 0.0000 | 0.0000 | 0.8626 | 7  | 4  | 1 |
| NDUFA9    | 12 | 12p13.32      | 4758283   | 4796397   | 0.0000 | 0.0000 | 0.8638 | 14 | 6  | 0 |
| TXLNA     | 1  | 1p35.1        | 32645287  | 32663886  | 0.0000 | 0.0000 | 0.8696 | 2  | 9  | 0 |
| ADIPOR2   | 12 | 12p13.33      | 1800193   | 1897844   | 0.0000 | 0.0000 | 0.8703 | 16 | 3  | 1 |
| CDC27     | 17 | 17q21.32      | 45195310  | 45266665  | 0.0000 | 0.0000 | 0.8704 | 2  | 7  | 0 |
| NOTCH3    | 19 | 19p13.12      | 15270445  | 15311792  | 0.0000 | 0.0000 | 0.8707 | 4  | 2  | 2 |
| VPS4B     | 18 | 18q21.33      | 61056427  | 61089752  | 0.0000 | 0.0000 | 0.8726 | 7  | 8  | 0 |
| PCID2     | 13 | 13q34         | 113831891 | 113863029 | 0.0000 | 0.0000 | 0.8735 | 10 | 2  | 2 |
| CARS2     | 13 | 13q34         | 111293759 | 111358463 | 0.0000 | 0.0000 | 0.8755 | 13 | 2  | 2 |
| LRAT      | 4  | 4q32.1        | 155665152 | 155674270 | 0.0000 | 0.0000 | 0.8781 | 1  | 8  | 1 |
| MCF2L     | 13 | 13q34         | 113548692 | 113754053 | 0.0000 | 0.0000 | 0.8864 | 11 | 2  | 2 |
| TAF3      | 10 | 10p14         | 7860501   | 8056714   | 0.0000 | 0.0000 | 0.8880 | 16 | 1  | 2 |
| LTBR      | 12 | 12p13.31      | 6493334   | 6500733   | 0.0000 | 0.0000 | 0.8995 | 12 | 3  | 0 |
| DDX47     | 12 | 12p13.1       | 12966280  | 12982909  | 0.0000 | 0.0000 | 0.9016 | 7  | 5  | 0 |
| CDC16     | 13 | 13q34         | 115000362 | 115038198 | 0.0000 | 0.0000 | 0.9134 | 11 | 2  | 2 |
| GD12      | 10 | 10p15.1       | 5807187   | 5884095   | 0.0000 | 0.0000 | 0.9163 | 15 | 0  | 1 |
| SH3RF1    | 4  | 4q32.3-q33    | 170015407 | 170192249 | 0.0000 | 0.0000 | 0.9173 | 2  | 6  | 1 |
| PLEKHA1   | 10 | 10q26.13      | 124134220 | 124191867 | 0.0000 | 0.0000 | 0.9228 | 5  | 9  | 2 |
| IKZF5     | 10 | 10q26.13      | 124751965 | 124768321 | 0.0000 | 0.0000 | 0.9308 | 5  | 9  | 2 |
| ATE1      | 10 | 10q26.13      | 123502626 | 123687977 | 0.0000 | 0.0000 | 0.9345 | 3  | 8  | 2 |
| C13orf8   | 13 | 13q34         | 115079988 | 115092796 | 0.0000 | 0.0000 | 0.9420 | 11 | 2  | 2 |
