# Supplementary material
Source: PubMed Central journal article supplement (PMC2852518)
Supplement: NIHMS28236-supplement-7.pdf [file NIHMS28236-supplement-7.pdf]

Supplementary Table 7: Genes that were significantly upregulated when gained or downregulated when lost (Mann-Whitney U test adjusted p&lt;0.05).

| Gains     |            |          |            |           |                                |       |        | Losses         |          |            |          |            |           |                                |       |        |                |
|-----------|------------|----------|------------|-----------|--------------------------------|-------|--------|----------------|----------|------------|----------|------------|-----------|--------------------------------|-------|--------|----------------|
| Symbol    | Chromosome | Cytoband | Start (bp) | End (bp)  | Man-Whitney U adjusted p value | Gains | Losses | Amplifications | Symbol   | Chromosome | Cytoband | Start (bp) | End (bp)  | Man-Whitney U adjusted p value | Gains | Losses | Amplifications |
| PANK4     | 1          | p36.32   | 243975     | 246505    | 0.000                          | 4     | 13     | 0              | ANKK1    | 9          | q12.2    | 106361354  | 106510705 | 0.048                          | 5     | 6      | 1              |
| IPD3      | 1          | p34.1    | 4441211    | 4443303   | 0.07                           | 3     | 3      | 0              | NANP1    | 2          | q13      | 11225248   | 112617471 | 0.048                          | 3     | 7      | 0              |
| HCTD3     | 1          | p44.22   | 4546229    | 4547702   | 0.06                           | 4     | 0      | 0              | SLC39P5  | 2          | q14.1    | 114471300  | 114514400 | 0.048                          | 4     | 6      | 0              |
| NBP1      | 1          | p32.3    | 5225483    | 5234609   | 0.000                          | 6     | 6      | 0              | TSR1     | 2          | q14.3    | 12248670   | 122525429 | 0.048                          | 2     | 7      | 0              |
| CFP2      | 1          | p32.3    | 5267101    | 5271961   | 0.000                          | 7     | 7      | 1              | PRK3     | 2          | q34.3    | 12846597   | 128461385 | 0.048                          | 4     | 8      | 0              |
| C16orf123 | 1          | p12.3    | 53679774   | 53682629  | 0.000                          | 7     | 7      | 1              | ORC25    | 2          | q36      | 216972187  | 217071026 | 0.048                          | 1     | 6      | 0              |
| LRR       | 1          | p12.3    | 53700000   | 53700000  | 0.000                          | 7     | 7      | 0              | BRP44    | 2          | q38.1    | 224822117  | 224824210 | 0.048                          | 2     | 6      | 0              |
| LRRIC42   | 1          | p12.3    | 54417750   | 54433841  | 0.001                          | 6     | 7      | 0              | CAB39    | 2          | q37.1    | 221767557  | 221857593 | 0.048                          | 2     | 7      | 0              |
| CTH17     | 1          | p12.3    | 55141138   | 55152021  | 0.004                          | 6     | 7      | 0              | PRK4     | 2          | q38.1    | 224822117  | 224824210 | 0.048                          | 2     | 6      | 0              |
| DHC24     | 1          | p12.3    | 55141138   | 55152021  | 0.004                          | 6     | 7      | 0              | FECCS3   | 3          | p23.3    | 15668      | 15668     | 0.011                          | 3     | 12     | 0              |
| NINL      | 1          | p11.3    | 6133091    | 61345405  | 0.007                          | 7     | 3      | 1              | CTH6     | 8          | p12      | 3013813    | 30141058  | 0.011                          | 2     | 12     | 0              |
| NAL       | 1          | p11.3    | 6208149    | 6209252   | 0.007                          | 7     | 3      | 1              | THF12    | 9          | q12      | 3543635    | 3551758   | 0.002                          | 2     | 12     | 0              |
| ALP       | 1          | p11.3    | 6208149    | 6209252   | 0.007                          | 7     | 3      | 0              | CDH22    | 9          | p12.2    | 2684895    | 26852725  | 0.033                          | 4     | 11     | 0              |
| ALP       | 1          | p11.3    | 6208149    | 6209252   | 0.007                          | 7     | 3      | 0              | PLA      | 9          | p12.2    | 2684895    | 26852725  | 0.033                          | 4     | 11     | 0              |
| SH3L1     | 1          | p22.3    | 87770265   | 8771367   | 0.000                          | 5     | 7      | 0              | UBE2D    | 9          | p13.3    | 33871752   | 33924001  | 0.005                          | 3     | 9      | 0              |
| MTL1L     | 1          | q24.3    | 117792761  | 117796527 | 0.000                          | 16    | 1      | 1              | UCP      | 9          | p13.3    | 35056965   | 35072738  | 0.033                          | 5     | 9      | 0              |
| C2H1A     | 1          | q24.1    | 118375511  | 11838555  | 0.000                          | 16    | 1      | 1              | C1A      | 9          | p13.3    | 35189893   | 35212595  | 0.042                          | 9     | 9      | 0              |
| MAPKAP2   | 1          | q24.1    | 118375511  | 11838555  | 0.000                          | 16    | 1      | 1              | POLR1E   | 9          | p13.2    | 37483945   | 37506661  | 0.048                          | 6     | 9      | 0              |
| AP1       | 1          | q24.1    | 118375511  | 11838555  | 0.000                          | 16    | 1      | 1              | P30      | 9          | q21.11   | 1765334    | 1765334   | 0.032                          | 5     | 6      | 0              |
| TAF1L     | 1          | q24.1    | 120728684  | 120761754 | 0.002                          | 18    | 0      | 1              | CDNF47   | 9          | q22.1    | 9165573    | 91611055  | 0.048                          | 4     | 7      | 0              |
| LMRF1     | 2          | q27.3    | 22852624   | 22852028  | 0.000                          | 3     | 10     | 0              | SEMA4D   | 9          | q22.2    | 9192506    | 9212088   | 0.048                          | 4     | 7      | 0              |
| TRAF3P1   | 2          | q27.3    | 22852624   | 22852028  | 0.000                          | 3     | 10     | 0              | MBE5     | 9          | q22.31   | 9672525    | 9682525   | 0.032                          | 2     | 8      | 0              |
| NDUF10    | 2          | q27.3    | 24831967   | 24854788  | 0.008                          | 3     | 14     | 0              | TEXD     | 8          | q11.1    | 102004272  | 103115174 | 0.032                          | 2     | 7      | 0              |
| CAH10     | 2          | q27.3    | 24831967   | 24854788  | 0.008                          | 3     | 14     | 0              | EPH4L4B  | 9          | q13.3    | 111834541  | 111938251 | 0.034                          | 10    | 10     | 0              |
| PRK       | 2          | q27.3    | 24831967   | 24854788  | 0.008                          | 3     | 14     | 0              | PRPF4    | 9          | q28      | 116037974  | 11605554  | 0.033                          | 2     | 8      | 0              |
| CHRN      | 2          | q27.3    | 24831967   | 24854788  | 0.008                          | 3     | 14     | 0              | URB3A    | 9          | q24.11   | 121443391  | 121500131 | 0.033                          | 2     | 7      | 0              |
| ARBB      | 3          | p26.1    | 5163900    | 5222597   | 0.000                          | 6     | 6      | 1              | ME27     | 9          | q24.13   | 12473644   | 12485255  | 0.005                          | 2     | 10     | 0              |
| TRAPPC1   | 3          | p26.3    | 52653      | 52652     | 0.000                          | 6     | 6      | 1              | FXC1     | 11         | p15.4    | 6202677    | 6202677   | 0.002                          | 2     | 7      | 0              |
| DGSI      | 3          | p26.3    | 5791638    | 5801903   | 0.000                          | 7     | 2      | 0              | TAF10    | 11         | p15.4    | 6632073    | 6633445   | 0.049                          | 2     | 7      | 0              |
| FANCD2    | 3          | p26.3    | 5791638    | 5801903   | 0.000                          | 7     | 2      | 0              | PCAF16B  | 11         | q24.1    | 1728215    | 1733545   | 0.002                          | 2     | 10     | 0              |
| TATDN2    | 3          | p26.3    | 10290372   | 10343334  | 0.000                          | 6     | 2      | 0              | C18orf21 | 18         | q12.2    | 33522588   | 33559241  | 0.000                          | 7     | 9      | 0              |
| TRDN      | 3          | p26.3    | 10290372   | 10343334  | 0.000                          | 6     | 2      | 0              | FYI1     | 18         | q11.33   | 6999471    | 6105406   | 0.034                          | 7     | 8      | 0              |
| RAF1      | 3          | p26.3    | 10290372   | 10343334  | 0.000                          | 6     | 2      | 0              | FYI1     | 18         | q11.33   | 6999471    | 6105406   | 0.034                          | 7     | 8      | 0              |
| TOR2B     | 3          | p24.2    | 25638476   | 2573638   | 0.001                          | 6     | 5      | 0              | NEOT1    | 18         | q22.2    | 70414267   | 70534810  | 0.035                          | 7     | 8      | 0              |
| NSG1      | 3          | p24.2    | 25638476   | 2573638   | 0.001                          | 6     | 5      | 0              | TFE      | 11         | q11.1    | 1096510    | 1096510   | 0.002                          | 2     | 7      | 0              |
| STTB      | 3          | p25      | 31574130   | 31679112  | 0.000                          | 7     | 5      | 0              | SFA1     | 22         | q12.2    | 30272979   | 30278913  | 0.043                          | 2     | 7      | 0              |
| STTB      | 3          | p25      | 31574130   | 31679112  | 0.000                          | 7     | 5      | 0              | NR2F1    | 22         | q12.2    | 30272979   | 30278913  | 0.043                          | 2     | 7      | 0              |
| DYNLL1    | 3          | p22.3    | 32567469   | 32612550  | 0.001                          | 6     | 5      | 0              | NHPDL1   | 22         | q13.2    | 42069460   | 42069568  | 0.023                          | 2     | 6      | 0              |
| LSBP2P    | 3          | p22.3    | 32567469   | 32612550  | 0.001                          | 6     | 5      | 0              | CCPCH2   | 22         | q13.3    | 5046465    | 50461911  | 0.043                          | 5     | 5      | 0              |
| SSUBL2    | 3          | p22.1    | 4262332    | 4263606   | 0.003                          | 3     | 7      | 0              |          |            |          |            |           |                                |       |        |                |
| CDK5      | 3          | p21.2    | 4262332    | 4263606   | 0.003                          | 3     | 7      | 0              |          |            |          |            |           |                                |       |        |                |
| UMPS      | 3          | q21.2    | 124449213  | 124464440 | 0.000                          | 7     | 3      | 0              |          |            |          |            |           |                                |       |        |                |
| TOPBP1    | 3          | q24      | 148705239  | 148745301 | 0.004                          | 15    | 0      | 0              |          |            |          |            |           |                                |       |        |                |
| CVG1      | 3          | q25.1    | 14908665   | 14909558  | 0.003                          | 18    | 1      | 2              |          |            |          |            |           |                                |       |        |                |
| TM6SF1    | 3          | q25.1    | 14908665   | 14909558  | 0.003                          | 18    | 1      | 2              |          |            |          |            |           |                                |       |        |                |
| CDH10     | 3          | q25.1    | 14908665   | 14909558  | 0.003                          | 18    | 1      | 2              |          |            |          |            |           |                                |       |        |                |
| EC2       | 3          | q26.31   | 17246513   | 17247455  | 0.000                          | 17    | 0      | 1              |          |            |          |            |           |                                |       |        |                |
| PRK       | 3          | q26.33   | 18033452   | 18034448  | 0.000                          | 14    | 0      | 0              |          |            |          |            |           |                                |       |        |                |
| FXR1      | 3          | q26.33   | 18033452   | 18034448  | 0.000                          | 14    | 0      | 0              |          |            |          |            |           |                                |       |        |                |
| DNAC13    | 3          | q26.33   | 18033452   | 18034448  | 0.000                          | 14    | 0      | 0              |          |            |          |            |           |                                |       |        |                |
| VEAT2     | 3          | q27.1    | 18341560   | 18353043  | 0.000                          | 11    | 1      | 1              |          |            |          |            |           |                                |       |        |                |
| PARL      | 3          | q27.1    | 18341560   | 18353043  | 0.000                          | 11    | 1      | 1              |          |            |          |            |           |                                |       |        |                |
| PARL      | 3          | q27.1    | 18341560   | 18353043  | 0.000                          | 11    | 1      | 1              |          |            |          |            |           |                                |       |        |                |
| PCOLCE    | 3          | q27.1    | 18341560   | 18353043  | 0.000                          | 11    | 1      | 1              |          |            |          |            |           |                                |       |        |                |
| SENP1     | 3          | q27.2    | 18532054   | 18534883  | 0.001                          | 11    | 1      | 0              |          |            |          |            |           |                                |       |        |                |
| SENP1     | 3          | q27.2    | 18532054   | 18534883  | 0.001                          | 11    | 1      | 0              |          |            |          |            |           |                                |       |        |                |
| TRPC1     | 3          | q27.2    | 18532054   | 18534883  | 0.001                          | 11    | 1      | 0              |          |            |          |            |           |                                |       |        |                |
| DNABP1    | 3          | q27.3    | 186285192  | 186314892 | 0.000                          | 11    | 1      | 0              |          |            |          |            |           |                                |       |        |                |
| PRC4      | 3          | q27.3    | 186285192  | 186314892 | 0.000                          | 11    | 1      | 0              |          |            |          |            |           |                                |       |        |                |
| RPL3L     | 3          | q27.3    | 186836739  | 18689596  | 0.000                          | 11    | 2      | 0              |          |            |          |            |           |                                |       |        |                |
| ATP13A3   | 3          | q28      | 184214401  | 18422522  | 0.000                          | 11    | 2      | 0              |          |            |          |            |           |                                |       |        |                |
| LSG1      | 3          | q29      | 184361518  | 184393206 | 0.000                          | 12    | 2      | 0              |          |            |          |            |           |                                |       |        |                |
| LYG1      | 3          | q29      | 184361518  | 184393206 | 0.000                          | 12    | 2      | 0              |          |            |          |            |           |                                |       |        |                |
| FYTD1     | 3          | q29      | 187445500  | 187511184 | 0.000                          | 11    | 2      | 0              |          |            |          |            |           |                                |       |        |                |
| TM6SF3    | 4          | q21.1    | 11971137   | 11972651  | 0.000                          | 4     | 3      | 0              |          |            |          |            |           |                                |       |        |                |
| STBD1     | 4          | q21.1    | 7727577    | 77275283  | 0.001                          | 4     | 3      | 0              |          |            |          |            |           |                                |       |        |                |
| CDL1      | 4          | q21.2    | 8502687    | 8527493   | 0.006                          | 3     | 4      | 0              |          |            |          |            |           |                                |       |        |                |
| CANX      | 4          | q25      | 11669788   | 116624261 | 0.000                          | 3     | 0      | 1              |          |            |          |            |           |                                |       |        |                |
| CANX2C    | 4          | q26      | 114372188  | 114683083 | 0.000                          | 3     | 4      | 0              |          |            |          |            |           |                                |       |        |                |
| CANX2C    | 4          | q26      | 114372188  | 114683083 | 0.000                          | 3     | 4      | 0              |          |            |          |            |           |                                |       |        |                |
| USP3      | 4          | q26      | 12913791   | 12913872  | 0.000                          | 8     | 3      | 0              |          |            |          |            |           |                                |       |        |                |
| EXOSC2    | 4          | q27      | 122722472  | 122738176 | 0.006                          | 12    | 2      | 1              |          |            |          |            |           |                                |       |        |                |
| RKAT109   | 4          | q27      | 122874488  | 122883607 | 0.001                          | 4     | 2      | 0              |          |            |          |            |           |                                |       |        |                |
| KAT109    | 4          | q27      | 122874488  | 122883607 | 0.001                          | 4     | 2      | 0              |          |            |          |            |           |                                |       |        |                |
| MGIC2     | 4          | q28.2    | 129194997  | 129209844 | 0.000                          | 5     | 2      | 0              |          |            |          |            |           |                                |       |        |                |
| SCOC      | 4          | q31.1    | 142142040  | 142155448 | 0.000                          | 4     | 6      | 0              |          |            |          |            |           |                                |       |        |                |
| ZNF330    | 4          | q31.21   | 142142040  | 142155448 | 0.000                          | 4     | 6      | 0              |          |            |          |            |           |                                |       |        |                |
| GM1       | 4          | q31.21   | 142142040  | 142155448 | 0.000                          | 4     | 6      | 0              |          |            |          |            |           |                                |       |        |                |
| GM1       | 4          | q31.21   | 142142040  | 142155448 | 0.000                          | 4     | 6      | 0              |          |            |          |            |           |                                |       |        |                |
| SMACCA5   | 4          | q31.21   | 144345616  | 14474568  | 0.000                          | 4     | 6      | 0              |          |            |          |            |           |                                |       |        |                |
| FAM178B   | 5          | p15.2    | 10268458   | 10269241  | 0.000                          | 9     | 6      | 1              |          |            |          |            |           |                                |       |        |                |
| CHML      | 5          | p15.2    | 10268458   | 10269241  | 0.000                          | 9     | 6      | 1              |          |            |          |            |           |                                |       |        |                |
| SETF      | 5          | p15.2    | 10335328   | 10335451  | 0.000                          | 9     | 6      | 1              |          |            |          |            |           |                                |       |        |                |
| SETF      | 5          | p15.2    | 10335328   | 10335451  | 0.000                          | 9     | 6      | 1              |          |            |          |            |           |                                |       |        |                |
| SNP       | 5          | p15.2    | 10335328   | 10335451  | 0.000                          | 9     | 6      | 1              |          |            |          |            |           |                                |       |        |                |
| ZNF22     | 5          | p15.1    | 16451629   | 16455858  | 0.002                          | 8     | 5      | 0              |          |            |          |            |           |                                |       |        |                |
| RUSC1     | 5          | p13.3    | 32227111   | 32313114  | 0.000                          | 8     | 4      | 0              |          |            |          |            |           |                                |       |        |                |
| MTMR12    | 5          | p13.3    | 32227111   | 32313114  | 0.000                          | 8     | 4      | 0              |          |            |          |            |           |                                |       |        |                |
