# Supplementary material
Source: PubMed Central journal article supplement (PMC2852518)
Supplement: NIHMS28236-supplement-8.pdf [file NIHMS28236-supplement-8.pdf]

**Supplementary Table 8: Networks and canonical pathways enriched for genes significantly upregulated when gained (Mann-Whitney U test adjusted p<0.05).**

| Networks |                                                                                                                                                                                                                                                             |       |                 |                                                                                                               |
|----------|-------------------------------------------------------------------------------------------------------------------------------------------------------------------------------------------------------------------------------------------------------------|-------|-----------------|---------------------------------------------------------------------------------------------------------------|
| ID       | Molecules in Network                                                                                                                                                                                                                                        | Score | Focus Molecules | Top Functions                                                                                                 |
| 1        | Akt,CASP6,COPB1,DDX54,ERC1,ESR1,GAB1,hCG,HSPE1,IKBKB,IL6,MAPK9,MAPKAPK2,MBD2,MEF2A (includes EG:4205),MMS19,PMS1,PMS2,PSD2,PTH,RAD51AP1,RANBP9,RFC2,RFC4,SBF2,TFF2,TGFB1,TM4SF1,TNF,TNFSF10,UBA52,UBR5,UNG,USP5,ZNF330                                      | 18    | 16              | Cell Death, Connective Tissue Disorders, Skeletal and Muscular Disorders                                      |
| 2        | CD9,CDH1,CREBL2,CREM,CSDA,DHCR7,DUSP14,E2f,EHMT1,FANCD2,FSH,GNAS,GPR56,GPRC5A,HDAC5,Histone h3,IgG,LDLR,Mi2,NCAPD2,PAWR,PGRMC1,PSMD3,PTPRF,RAD21,RNASEN,SF3B3,SMARCA5,SMC4,STAR,STK24,TNFAIP3,TOB1,VCL,ZEB1                                                 | 13    | 13              | Lipid Metabolism, Molecular Transport, Small Molecule Biochemistry                                            |
| 3        | ARPC1B,ATM,BIRC2,BIRC5,CASP1,CASP9,CLTC,CORO1C,DNMT1,E2F1,EIF2B1,H2AFX,IFNB1,IL1RN,IRF1,JAK2,KIN,LGALS1,LTF,MBNL2,PAK1,PHB2,PHB (includes EG:5245),POLG,PTK2,RPL19 (includes EG:6143),STRAP,TNFRSF1B,TP53,TP63,TP73,XPA,XPC                                 | 13    | 13              | Cancer, Cell Death, Hematological Disease                                                                     |
| 4        | ACTB,ANXA5,APP,CAT,CCL20,CCNB2,CDKN1A,CSF1R,FOXO1,HDAC1,ICOS,IFNG,IL5,IL33,IPO5,IP08,JAK1,JAK2,LGALS3,MGST1,MHC Class I (complex),MS4A2,MUC1,OGG1,RAD9A,RAF1,Ras,RPL23A (includes EG:6147),SOCS1,SRP19,STOML2,SUMO2,TCF7L2 (includes EG:6934),TOPBP1,USP6NL | 12    | 12              | Cellular Growth and Proliferation, Skeletal and Muscular Disorders, Lymphoid Tissue Structure and Development |
| 5        | PEX5,PEX12                                                                                                                                                                                                                                                  | 3     | 2               | Genetic Disorder, Metabolic Disease, Cellular Assembly and Organization                                       |

| Canonical Pathways |                                                            |        |          |                                                                       |
|--------------------|------------------------------------------------------------|--------|----------|-----------------------------------------------------------------------|
| Canonical Pathways | Ingenuity Canonical Pathways                               | p      | Ratio    | Molecules                                                             |
| 1                  | Angiopoietin Signaling                                     | 0.0030 | 7.35E-02 | PTK2,PAK1,FOXO1,PIK3C3,BIRC5                                          |
| 2                  | HGF Signaling                                              | 0.0047 | 5.94E-02 | PTK2,RAF1,PAK1,GAB1,PIK3C3,MAPK9                                      |
| 3                  | NRF2-mediated Oxidative Stress Response                    | 0.0059 | 4.42E-02 | RAF1,MGST1,PIK3C3,DNAJB11,DNAJC19,CAT,MAPK9,MAFG                      |
| 4                  | Molecular Mechanisms of Cancer                             | 0.0065 | 3.37E-02 | PTK2,CASP6,RAF1,CDH1,PAK1,CAMK2D,FANCD2,FOXO1,GAB1,PIK3C3,MAPK9,BIRC2 |
| 5                  | Estrogen Receptor Signaling                                | 0.0068 | 5.04E-02 | RAF1,TAF15,TAF5L,PHB2,H3F3B,POLR2H                                    |
| 6                  | G12/13 $\pm$ Signaling                                     | 0.0081 | 5.04E-02 | PTK2,RAF1,CDH1,PIK3C3,MEF2A (includes EG:4205),MAPK9                  |
| 7                  | FAK Signaling                                              | 0.0102 | 5.32E-02 | PTK2,RAF1,PAK1,PIK3C3,CAPN10                                          |
| 8                  | Amyotrophic Lateral Sclerosis Signaling                    | 0.0123 | 5.38E-02 | PAK1,PIK3C3,CAT,CAPN10,BIRC2                                          |
| 9                  | D-arginine and D-ornithine Metabolism                      | 0.0158 | 1.00E+00 | DAO                                                                   |
| 10                 | Fc Epsilon RI Signaling                                    | 0.0182 | 5.05E-02 | RAF1,GAB1,PIK3C3,MS4A2,MAPK9                                          |
| 11                 | Pyrimidine Metabolism                                      | 0.0186 | 3.95E-02 | NUDT5,POLR1E,POLG,POLR2H,UMPS,UNG                                     |
| 12                 | Mechanisms of Viral Exit from Host Cells                   | 0.0219 | 7.69E-02 | CHMP4C,SH3GLB1,VPS4A                                                  |
| 13                 | Renal Cell Carcinoma Signaling                             | 0.0240 | 5.63E-02 | RAF1,PAK1,GAB1,PIK3C3                                                 |
| 14                 | IL-3 Signaling                                             | 0.0251 | 5.56E-02 | RAF1,PAK1,FOXO1,PIK3C3                                                |
| 15                 | Renin-Angiotensin Signaling                                | 0.0257 | 4.59E-02 | PTK2,RAF1,PAK1,PIK3C3,MAPK9                                           |
| 16                 | LPS-stimulated MAPK Signaling                              | 0.0263 | 5.19E-02 | RAF1,PAK1,PIK3C3,MAPK9                                                |
| 17                 | Purine Metabolism                                          | 0.0324 | 2.96E-02 | NUDT5,DLG1,ATP5C1,DDX39,POLR1E,POLG,SMARCA5,POLR2H,VPS4B              |
| 18                 | Role of Oct4 in Mammalian Embryonic Stem Cell Pluripotency | 0.0339 | 6.67E-02 | CASP6,MEF2A (includes EG:4205),SH3GLB1                                |
| 19                 | Protein Ubiquitination Pathway                             | 0.0363 | 3.55E-02 | PSMB3,USP53,USP5,USP38,PSMA4,PSMD3,BIRC2                              |
| 20                 | FGF Signaling                                              | 0.0380 | 4.76E-02 | RAF1,GAB1,PIK3C3,MAPKAPK2                                             |
| 21                 | Polyamine Regulation in Colon Cancer                       | 0.0407 | 5.77E-02 | PSMB3,PSMA4,PSMD3                                                     |
| 22                 | Apoptosis Signaling                                        | 0.0427 | 4.44E-02 | CASP6,RAF1,CAPN10,BIRC2                                               |
| 23                 | VEGF Signaling                                             | 0.0427 | 4.49E-02 | PTK2,RAF1,FOXO1,PIK3C3                                                |
| 24                 | GNRH Signaling                                             | 0.0457 | 3.85E-02 | PTK2,RAF1,PAK1,CAMK2D,MAPK9                                           |
| 25                 | Endometrial Cancer Signaling                               | 0.0490 | 5.45E-02 | RAF1,CDH1,PIK3C3                                                      |
| 26                 | p53 Signaling                                              | 0.0490 | 4.49E-02 | CASP6,PIK3C3,C12ORF5,BIRC5                                            |
| 27                 | IGF-1 Signaling                                            | 0.0490 | 4.26E-02 | PTK2,RAF1,FOXO1,PIK3C3                                                |
