# Supplementary material
Source: PubMed Central journal article supplement (PMC2852518)
Supplement: NIHMS28236-supplement-9.pdf [file NIHMS28236-supplement-9.pdf]

**Supplementary Table 9: Networks and canonical pathways enriched for genes significantly downregulated when lost (Mann-Whitney U test adjusted p<0.05).**

| <b>Networks</b> |                                                         |              |                        |                                                                                        |
|-----------------|---------------------------------------------------------|--------------|------------------------|----------------------------------------------------------------------------------------|
| <b>ID</b>       | <b>Molecules in Network</b>                             | <b>Score</b> | <b>Focus Molecules</b> | <b>Top Functions</b>                                                                   |
| 1               | PARP1,PRKDC,TERF2,VCP,WRN(includes EG:7486),XRCC5,XRCC6 | 4            | 2                      | DNA Replication, Recombination, and Repair, Cellular Assembly and Organization, Cancer |
