# Supplementary material
Source: PubMed Central journal article supplement (PMC2852518)
Supplement: NIHMS28236-supplement-10.pdf [file NIHMS28236-supplement-10.pdf]

Supplementary Table 10: Genes whose expression correlates with copy number (Pearson's correlation adjusted p<0.05) and are recurrently amplified.

| Symbol     | Chromosome | cytoband | Start (bp) | End (bp)  | Pearson's p value | Pearson's adjusted p value | Pearson r value | Gains | Losses | Amplifications |
|------------|------------|----------|------------|-----------|-------------------|----------------------------|-----------------|-------|--------|----------------|
| IFI16      | 1          | q23.1    | 158969758  | 159024943 | 0.002             | 0.022                      | 0.608           | 19    | 0      | 2              |
| COPA       | 1          | q23.2    | 160258377  | 160313354 | 0.001             | 0.011                      | 0.654           | 19    | 0      | 2              |
| VANGL2     | 1          | q23.2    | 160370364  | 160398464 | 0.000             | 0.005                      | 0.702           | 19    | 0      | 2              |
| F11R       | 1          | q23.3    | 160965001  | 161008734 | 0.000             | 0.006                      | 0.689           | 19    | 0      | 2              |
| ARHGAP30   | 1          | q23.3    | 161016732  | 161039760 | 0.002             | 0.021                      | 0.610           | 19    | 0      | 2              |
| DEDD       | 1          | q23.3    | 161090767  | 161102478 | 0.002             | 0.023                      | 0.604           | 19    | 0      | 2              |
| USP21      | 1          | q23.3    | 161129254  | 161135513 | 0.003             | 0.029                      | 0.588           | 19    | 0      | 2              |
| PPOX       | 1          | q23.3    | 161136181  | 161146872 | 0.004             | 0.040                      | 0.564           | 19    | 0      | 2              |
| B4GALT3    | 1          | q23.3    | 161141101  | 161147314 | 0.003             | 0.035                      | 0.572           | 19    | 0      | 2              |
| DUSP12     | 1          | q23.3    | 161719581  | 161726949 | 0.001             | 0.015                      | 0.633           | 19    | 0      | 2              |
| ATF6       | 1          | q23.3    | 161736084  | 161928852 | 0.005             | 0.047                      | 0.551           | 19    | 0      | 2              |
| MTR        | 1          | q43      | 236958581  | 237067281 | 0.002             | 0.023                      | 0.604           | 22    | 0      | 2              |
| TM4SF1     | 3          | q25.1    | 149086805  | 149095568 | 0.003             | 0.031                      | 0.582           | 16    | 1      | 2              |
| MRPL36     | 5          | p15.33   | 1798503    | 1799956   | 0.003             | 0.030                      | 0.585           | 11    | 4      | 2              |
| NDUFS6     | 5          | p15.33   | 1801509    | 1816161   | 0.000             | 0.007                      | 0.676           | 11    | 4      | 2              |
| TPD52L1    | 6          | q22.31   | 125474879  | 125585553 | 0.003             | 0.032                      | 0.580           | 12    | 2      | 2              |
| HDDC2      | 6          | q22.31   | 125596496  | 125623282 | 0.000             | 0.000                      | 0.808           | 12    | 2      | 2              |
| ZNF92      | 7          | q11.21   | 64838752   | 64866038  | 0.002             | 0.023                      | 0.604           | 5     | 1      | 2              |
| IMPA1      | 8          | q21.13   | 82569151   | 82598589  | 0.001             | 0.015                      | 0.633           | 12    | 1      | 2              |
| ZFAND1     | 8          | q21.13   | 82613958   | 82633530  | 0.000             | 0.007                      | 0.681           | 12    | 1      | 2              |
| CHMP4C     | 8          | q21.13   | 82644688   | 82671750  | 0.000             | 0.010                      | 0.659           | 12    | 1      | 2              |
| DECR1      | 8          | q21.3    | 91013580   | 91064227  | 0.002             | 0.025                      | 0.598           | 14    | 1      | 2              |
| OTUD6B     | 8          | q21.3    | 92082424   | 92099319  | 0.003             | 0.033                      | 0.578           | 14    | 1      | 2              |
| KIAA1429   | 8          | q22.1    | 95500600   | 95565688  | 0.002             | 0.028                      | 0.589           | 14    | 0      | 2              |
| ESRP1      | 8          | q22.1    | 95653364   | 95719694  | 0.000             | 0.008                      | 0.673           | 14    | 0      | 2              |
| INTS8      | 8          | q22.1    | 95835534   | 95892720  | 0.004             | 0.038                      | 0.566           | 14    | 0      | 2              |
| UQCRB      | 8          | q22.1    | 97239310   | 97247862  | 0.003             | 0.029                      | 0.586           | 18    | 0      | 2              |
| MTERFD1    | 8          | q22.1    | 97251663   | 97273817  | 0.002             | 0.025                      | 0.596           | 18    | 0      | 2              |
| PTDSS1     | 8          | q22.1    | 97274164   | 97346774  | 0.000             | 0.001                      | 0.755           | 18    | 0      | 2              |
| SDC2       | 8          | q22.1    | 97505882   | 97624037  | 0.006             | 0.049                      | 0.546           | 18    | 0      | 2              |
| AP003117.2 | 8          | q22.1    | 97657499   | 98155718  | 0.005             | 0.048                      | 0.549           | 18    | 0      | 2              |
| COX6C      | 8          | q22.2    | 100890372  | 100905895 | 0.000             | 0.005                      | 0.701           | 19    | 0      | 2              |
| ZNF706     | 8          | q22.3    | 102209268  | 102217960 | 0.000             | 0.003                      | 0.717           | 19    | 0      | 2              |
| RRM2B      | 8          | q22.3    | 103216732  | 103251346 | 0.002             | 0.028                      | 0.589           | 19    | 0      | 2              |
| UBR5       | 8          | q22.3    | 103265572  | 103424495 | 0.000             | 0.000                      | 0.835           | 19    | 0      | 2              |
| ATP6V1C1   | 8          | q22.3    | 104033248  | 104085285 | 0.005             | 0.045                      | 0.553           | 19    | 0      | 2              |
| ABRA       | 8          | q23.1    | 107771712  | 107782472 | 0.004             | 0.036                      | -0.570          | 18    | 0      | 2              |
| ENY2       | 8          | q23.1    | 110346570  | 110355898 | 0.001             | 0.011                      | 0.652           | 19    | 0      | 2              |
| EBAG9      | 8          | q23.2    | 110551929  | 110577387 | 0.000             | 0.006                      | 0.691           | 19    | 0      | 2              |
| UTP23      | 8          | q24.11   | 117778742  | 117798816 | 0.002             | 0.026                      | 0.596           | 17    | 0      | 2              |
| RAD21      | 8          | q24.11   | 117858174  | 117887105 | 0.005             | 0.044                      | 0.556           | 17    | 0      | 2              |
| ASAP1      | 8          | q24.21   | 131064353  | 131414217 | 0.000             | 0.002                      | 0.753           | 18    | 1      | 2              |
| PHF20L1    | 8          | q24.22   | 133787604  | 133861052 | 0.000             | 0.007                      | 0.681           | 19    | 1      | 2              |
| ST3GAL1    | 8          | q24.22   | 134467091  | 134584183 | 0.002             | 0.026                      | 0.596           | 19    | 2      | 2              |
| PITRM1     | 10         | p15.2    | 3179922    | 3215003   | 0.000             | 0.006                      | 0.691           | 16    | 0      | 2              |
| KIN        | 10         | p14      | 7797367    | 7829944   | 0.000             | 0.001                      | 0.767           | 16    | 1      | 2              |
| ATP5C1     | 10         | p14      | 7830093    | 7849755   | 0.001             | 0.011                      | 0.654           | 16    | 1      | 2              |
| TAF3       | 10         | p14      | 7860501    | 8056714   | 0.000             | 0.000                      | 0.888           | 16    | 1      | 2              |
| USP6NL     | 10         | p14      | 11502509   | 11653753  | 0.000             | 0.001                      | 0.766           | 13    | 1      | 2              |
| SGPL1      | 10         | q22.1    | 72575704   | 72640930  | 0.000             | 0.006                      | 0.691           | 9     | 4      | 2              |
| PCBD1      | 10         | q22.1    | 72643267   | 72648541  | 0.004             | 0.040                      | 0.563           | 9     | 4      | 2              |
| GFRR2      | 10         | q26.13   | 123237848  | 123357972 | 0.000             | 0.000                      | 0.820           | 3     | 8      | 2              |
| ATE1       | 10         | q26.13   | 123502626  | 123687977 | 0.000             | 0.000                      | 0.935           | 3     | 8      | 2              |
| NSMCE4A    | 10         | q26.13   | 123716611  | 123734710 | 0.001             | 0.011                      | 0.654           | 3     | 8      | 2              |
| TACC2      | 10         | q26.13   | 123748709  | 124014059 | 0.000             | 0.000                      | 0.851           | 4     | 9      | 2              |
| PLEKHA1    | 10         | q26.13   | 124134220  | 124191867 | 0.000             | 0.000                      | 0.923           | 5     | 9      | 2              |
| CUZD1      | 10         | q26.13   | 124591665  | 124610309 | 0.001             | 0.020                      | 0.612           | 5     | 9      | 2              |
| PSTK       | 10         | q26.13   | 124739556  | 124749908 | 0.000             | 0.005                      | 0.694           | 5     | 9      | 2              |
| IKZF5      | 10         | q26.13   | 124751965  | 124768321 | 0.000             | 0.000                      | 0.931           | 5     | 9      | 2              |
| ACADSB     | 10         | q26.13   | 124768429  | 124817806 | 0.000             | 0.002                      | 0.738           | 5     | 9      | 2              |
| BUB3       | 10         | q26.13   | 124913760  | 124924886 | 0.000             | 0.000                      | 0.837           | 5     | 9      | 2              |
| FADD       | 11         | q13.3    | 70049269   | 70053508  | 0.001             | 0.017                      | 0.624           | 9     | 2      | 2              |
| PPFIA1     | 11         | q13.3    | 70116823   | 70230500  | 0.000             | 0.003                      | 0.720           | 9     | 2      | 2              |
| WNK1       | 12         | p13.33   | 862225     | 1020618   | 0.003             | 0.035                      | 0.572           | 15    | 2      | 2              |
| DCP1B      | 12         | p13.33   | 2055216    | 2113677   | 0.002             | 0.023                      | 0.604           | 16    | 3      | 2              |
| IRS2       | 13         | q34      | 110406186  | 110438914 | 0.000             | 0.000                      | 0.800           | 13    | 2      | 2              |
| RAB20      | 13         | q34      | 111175419  | 111214080 | 0.000             | 0.009                      | 0.668           | 13    | 2      | 2              |
| CARS2      | 13         | q34      | 111293759  | 111358463 | 0.000             | 0.000                      | 0.876           | 13    | 2      | 2              |
| ING1       | 13         | q34      | 111365083  | 111373420 | 0.002             | 0.026                      | 0.595           | 13    | 2      | 2              |
| ANKRD10    | 13         | q34      | 111530887  | 111567416 | 0.002             | 0.023                      | 0.604           | 13    | 2      | 2              |
| ARHGEF7    | 13         | q34      | 111767624  | 111958078 | 0.000             | 0.000                      | 0.795           | 13    | 2      | 2              |
| C13orf16   | 13         | q34      | 111973015  | 111996594 | 0.000             | 0.002                      | 0.750           | 13    | 2      | 2              |
| TUBGCP3    | 13         | q34      | 113139326  | 113242481 | 0.000             | 0.000                      | 0.810           | 12    | 2      | 2              |
| ATP11A     | 13         | q34      | 113344643  | 113541482 | 0.000             | 0.007                      | 0.683           | 11    | 2      | 2              |
| MCF2L      | 13         | q34      | 113548692  | 113754053 | 0.000             | 0.000                      | 0.886           | 11    | 2      | 2              |
| PCID2      | 13         | q34      | 113831891  | 113863029 | 0.000             | 0.000                      | 0.874           | 10    | 2      | 2              |
| CUL4A      | 13         | q34      | 113863086  | 113919399 | 0.000             | 0.000                      | 0.800           | 10    | 2      | 2              |
| GRTP1      | 13         | q34      | 113978506  | 114018463 | 0.000             | 0.001                      | 0.786           | 10    | 2      | 2              |
| ADPRHL1    | 13         | q34      | 114076262  | 114107752 | 0.000             | 0.004                      | 0.717           | 10    | 2      | 2              |
| DCUN1D2    | 13         | q34      | 114110134  | 114145023 | 0.000             | 0.002                      | 0.751           | 10    | 2      | 2              |
| TMCO3      | 13         | q34      | 114145308  | 114204542 | 0.000             | 0.000                      | 0.794           | 10    | 2      | 2              |
| CDC16      | 13         | q34      | 115000362  | 115038198 | 0.000             | 0.000                      | 0.913           | 11    | 2      | 2              |
| UPF3A      | 13         | q34      | 115047078  | 115071261 | 0.000             | 0.000                      | 0.804           | 11    | 2      | 2              |
| C13orf8    | 13         | q34      | 115079988  | 115092796 | 0.000             | 0.000                      | 0.942           | 11    | 2      | 2              |
| CD97       | 19         | p13.12   | 14492213   | 14519531  | 0.002             | 0.021                      | 0.610           | 5     | 3      | 2              |
| DDX39      | 19         | p13.12   | 14519633   | 14530171  | 0.000             | 0.000                      | 0.858           | 5     | 3      | 2              |
| PKN1       | 19         | p13.12   | 14544166   | 14582678  | 0.000             | 0.001                      | 0.791           | 5     | 3      | 2              |
| PTGER1     | 19         | p13.12   | 14583279   | 14586174  | 0.000             | 0.007                      | 0.676           | 5     | 3      | 2              |
| GIPC1      | 19         | p13.12   | 14588572   | 14606944  | 0.000             | 0.004                      | 0.710           | 5     | 3      | 2              |
| DNAJB1     | 19         | p13.12   | 14625582   | 14629201  | 0.000             | 0.002                      | 0.749           | 5     | 3      | 2              |
| NDUFB7     | 19         | p13.12   | 14676892   | 14682886  | 0.000             | 0.000                      | 0.843           | 5     | 3      | 2              |
| ZNF333     | 19         | p13.12   | 14800870   | 14831772  | 0.001             | 0.010                      | 0.656           | 5     | 3      | 2              |
| OR7C2      | 19         | p13.12   | 15052301   | 15053260  | 0.001             | 0.016                      | 0.629           | 4     | 3      | 2              |
| SYDE1      | 19         | p13.12   | 15218214   | 15225789  | 0.003             | 0.030                      | 0.585           | 4     | 2      | 2              |
| ILVBL      | 19         | p13.12   | 15225789   | 15236577  | 0.000             | 0.003                      | 0.725           | 4     | 2      | 2              |
| NOTCH3     | 19         | p13.12   | 15270445   | 15311792  | 0.000             | 0.000                      | 0.871           | 4     | 2      | 2              |
| BRD4       | 19         | p13.12   | 15348301   | 15391262  | 0.000             | 0.000                      | 0.807           | 4     | 2      | 2              |
